# Supplementary material for: LABEL: Fast and Accurate Lineage Assignment with Assessment of H5N1 and H9N2 Influenza A Hemagglutinins
Source: PLoS One. 2014 Jan 23;9(1):e86921. doi: 10.1371/journal.pone.0086921 (PMC3900692; doi:10.1371/journal.pone.0086921)
Supplement: File S2 — H9 dataset information & GISAID acknowledgement. (XLSX) [file pone.0086921.s009.xlsx]

## Sheet: Main Result
Accession	Strain	Annotation	Prediction	Correct
EPI_ISL_1278	A/quail/Arkansas/29209-1/93	AR29209	AR29209	TRUE
EPI_ISL_1276	A/Shorebird/Delaware/9/96	AR29209	AR29209	TRUE
EPI_ISL_99516	A/shorebird/Delaware_Bay/260/1996	AR29209	AR29209	TRUE
EPI_ISL_99402	A/shorebird/Delaware_Bay/31/1996	AR29209	AR29209	TRUE
EPI_ISL_1277	A/turkey/Minnesota/38391-6/95	AR29209	AR29209	TRUE
EPI_ISL_1270	A/chicken/Beijing/1/94	Chk_Bei	Chk_Bei	TRUE
EPI_ISL_84314	A/chicken/Hebei/11/2002	Chk_Bei	Chk_Bei	TRUE
EPI_ISL_7377	A/chicken/Hunan/4246/2005	Chk_Bei	Chk_Bei	TRUE
EPI_ISL_7324	A/chicken/Shantou/6786/2004	Chk_Bei	Chk_Bei	TRUE
EPI_ISL_7412	A/chukkar/Shantou/1039/2003	Chk_Bei	Chk_Bei	TRUE
EPI_ISL_7399	A/chukkar/Shantou/1059/2002	Chk_Bei	Chk_Bei	TRUE
EPI_ISL_7432	A/chukkar/Shantou/107/2004	Chk_Bei	Chk_Bei	TRUE
EPI_ISL_7437	A/chukkar/Shantou/1447/2004	Chk_Bei	Chk_Bei	TRUE
EPI_ISL_7440	A/chukkar/Shantou/2226/2004	Chk_Bei	Chk_Bei	TRUE
EPI_ISL_7433	A/chukkar/Shantou/290/2004	Chk_Bei	Chk_Bei	TRUE
EPI_ISL_7343	A/chukkar/Shantou/338/2002	Chk_Bei	Chk_Bei	TRUE
EPI_ISL_7418	A/chukkar/Shantou/3980/2003	Chk_Bei	Chk_Bei	TRUE
EPI_ISL_7424	A/chukkar/Shantou/4350/2003	Chk_Bei	Chk_Bei	TRUE
EPI_ISL_7365	A/chukkar/Shantou/465/2002	Chk_Bei	Chk_Bei	TRUE
EPI_ISL_7376	A/chukkar/Shantou/469/2002	Chk_Bei	Chk_Bei	TRUE
EPI_ISL_7448	A/chukkar/Shantou/6288/2004	Chk_Bei	Chk_Bei	TRUE
EPI_ISL_7451	A/chukkar/Shantou/6571/2004	Chk_Bei	Chk_Bei	TRUE
EPI_ISL_2303	A/duck/Shantou/2134/00	Chk_Bei	Chk_Bei	TRUE
EPI_ISL_7401	A/duck/Shantou/3658/2003	Chk_Bei	Chk_Bei	TRUE
EPI_ISL_9788	A/Gf/HK/SSP607/2003	Chk_Bei	Chk_Bei	TRUE
EPI_ISL_3046	A/Guangzhou/333/99	Chk_Bei	Chk_Bei	TRUE
EPI_ISL_7463	A/Guinea_fowl/Shantou/630/2005	Chk_Bei	Chk_Bei	TRUE
EPI_ISL_4465	A/guineafowl/HongKong/NT184/03	Chk_Bei	Chk_Bei	TRUE
EPI_ISL_9786	A/HK/2108/2003	Chk_Bei	Chk_Bei	TRUE
EPI_ISL_7436	A/partridge/Shantou/1405/2004	Chk_Bei	Chk_Bei	TRUE
EPI_ISL_7439	A/partridge/Shantou/1651/2004	Chk_Bei	Chk_Bei	TRUE
EPI_ISL_7416	A/partridge/Shantou/1800/2000	Chk_Bei	Chk_Bei	TRUE
EPI_ISL_7427	A/partridge/Shantou/2063/2000	Chk_Bei	Chk_Bei	TRUE
EPI_ISL_7438	A/partridge/Shantou/2158/2000	Chk_Bei	Chk_Bei	TRUE
EPI_ISL_7469	A/partridge/Shantou/22102/2005	Chk_Bei	Chk_Bei	TRUE
EPI_ISL_7287	A/partridge/Shantou/24/2000	Chk_Bei	Chk_Bei	TRUE
EPI_ISL_7430	A/partridge/Shantou/25/2004	Chk_Bei	Chk_Bei	TRUE
EPI_ISL_7354	A/partridge/Shantou/354/2002	Chk_Bei	Chk_Bei	TRUE
EPI_ISL_7407	A/partridge/Shantou/3811/2002	Chk_Bei	Chk_Bei	TRUE
EPI_ISL_7420	A/partridge/Shantou/4093/2003	Chk_Bei	Chk_Bei	TRUE
EPI_ISL_7310	A/partridge/Shantou/4541/2001	Chk_Bei	Chk_Bei	TRUE
EPI_ISL_7321	A/partridge/Shantou/4829/2001	Chk_Bei	Chk_Bei	TRUE
EPI_ISL_7429	A/partridge/Shantou/4889/2003	Chk_Bei	Chk_Bei	TRUE
EPI_ISL_7387	A/partridge/Shantou/545/2002	Chk_Bei	Chk_Bei	TRUE
EPI_ISL_7411	A/partridge/Shantou/600/2003	Chk_Bei	Chk_Bei	TRUE
EPI_ISL_7434	A/partridge/Shantou/688/2004	Chk_Bei	Chk_Bei	TRUE
EPI_ISL_7457	A/partridge/Shantou/7343/2004	Chk_Bei	Chk_Bei	TRUE
EPI_ISL_9787	A/Ph/HK/CSW1323/2003	Chk_Bei	Chk_Bei	TRUE
EPI_ISL_7464	A/pheasant/Shantou/1578/2005	Chk_Bei	Chk_Bei	TRUE
EPI_ISL_7467	A/pheasant/Shantou/17033/2005	Chk_Bei	Chk_Bei	TRUE
EPI_ISL_7468	A/pheasant/Shantou/21583/2005	Chk_Bei	Chk_Bei	TRUE
EPI_ISL_7441	A/pheasant/Shantou/2290/2004	Chk_Bei	Chk_Bei	TRUE
EPI_ISL_7415	A/pheasant/Shantou/3530/2003	Chk_Bei	Chk_Bei	TRUE
EPI_ISL_7421	A/pheasant/Shantou/4116/2003	Chk_Bei	Chk_Bei	TRUE
EPI_ISL_7409	A/pheasant/Shantou/443/2003	Chk_Bei	Chk_Bei	TRUE
EPI_ISL_7425	A/pheasant/Shantou/4469/2003	Chk_Bei	Chk_Bei	TRUE
EPI_ISL_7428	A/pheasant/Shantou/4709/2003	Chk_Bei	Chk_Bei	TRUE
EPI_ISL_7410	A/pheasant/Shantou/511/2003	Chk_Bei	Chk_Bei	TRUE
EPI_ISL_7454	A/pheasant/Shantou/6893/2004	Chk_Bei	Chk_Bei	TRUE
EPI_ISL_7458	A/pheasant/Shantou/7501/2004	Chk_Bei	Chk_Bei	TRUE
EPI_ISL_7459	A/pheasant/Shantou/7814/2004	Chk_Bei	Chk_Bei	TRUE
EPI_ISL_7435	A/pheasant/Shantou/841/2004	Chk_Bei	Chk_Bei	TRUE
EPI_ISL_11297	A/quail/Shantou/1038/2002	Chk_Bei	Chk_Bei	TRUE
EPI_ISL_11305	A/quail/Shantou/1140/2003	Chk_Bei	Chk_Bei	TRUE
EPI_ISL_11272	A/quail/Shantou/1318/2000	Chk_Bei	Chk_Bei	TRUE
EPI_ISL_11281	A/quail/Shantou/1425/2001	Chk_Bei	Chk_Bei	TRUE
EPI_ISL_11282	A/quail/Shantou/1461/2001	Chk_Bei	Chk_Bei	TRUE
EPI_ISL_11338	A/quail/Shantou/15892/2005	Chk_Bei	Chk_Bei	TRUE
EPI_ISL_11306	A/quail/Shantou/1780/2003	Chk_Bei	Chk_Bei	TRUE
EPI_ISL_11307	A/quail/Shantou/1978/2003	Chk_Bei	Chk_Bei	TRUE
EPI_ISL_11340	A/quail/Shantou/20787/2005	Chk_Bei	Chk_Bei	TRUE
EPI_ISL_11269	A/quail/Shantou/243/2000	Chk_Bei	Chk_Bei	TRUE
EPI_ISL_11308	A/quail/Shantou/2608/2003	Chk_Bei	Chk_Bei	TRUE
EPI_ISL_11293	A/quail/Shantou/365/2002	Chk_Bei	Chk_Bei	TRUE
EPI_ISL_11313	A/quail/Shantou/3700/2003	Chk_Bei	Chk_Bei	TRUE
EPI_ISL_11295	A/quail/Shantou/396/2002	Chk_Bei	Chk_Bei	TRUE
EPI_ISL_11287	A/quail/Shantou/4179/2001	Chk_Bei	Chk_Bei	TRUE
EPI_ISL_11289	A/quail/Shantou/4762/2001	Chk_Bei	Chk_Bei	TRUE
EPI_ISL_11319	A/quail/Shantou/5/2004	Chk_Bei	Chk_Bei	TRUE
EPI_ISL_7311	A/silky_chicken/Shantou/473/2004	Chk_Bei	Chk_Bei	TRUE
EPI_ISL_7312	A/silky_chicken/Shantou/999/2004	Chk_Bei	Chk_Bei	TRUE
EPI_ISL_98399	A/green-winged_teal/209/Texas/2009	DB277	DB277	TRUE
EPI_ISL_82526	A/northern_shoveler/California/44363-062/2007	DB277	DB277	TRUE
EPI_ISL_82487	A/northern_shoveler/Washington/44249-604/2006	DB277	DB277	TRUE
EPI_ISL_67878	A/ruddy_turnstone/Delaware/1070/2002	DB277	DB277	TRUE
EPI_ISL_99349	A/shorebird/Delaware_Bay/277/2000	DB277	DB277	TRUE
EPI_ISL_77913	A/thick-billed_murre/Alaska/44085-155/2006	DB277	DB277	TRUE
EPI_ISL_77917	A/thick-billed_murre/Alaska/44145-186/2006	DB277	DB277	TRUE
EPI_ISL_7470	A/chukkar/Shantou/22116/2005	G1_Asia	G1_Asia	TRUE
EPI_ISL_66541	A/ferret/Maryland/P10-UMD/2008	G1_Asia	G1_Asia	TRUE
EPI_ISL_3215	A/guinea_fowl/Hong_Kong/WF10/99	G1_Asia	G1_Asia	TRUE
EPI_ISL_7471	A/Guinea_fowl/Shantou/2076/2001	G1_Asia	G1_Asia	TRUE
EPI_ISL_140	A/Hong_Kong/1073/99	G1_Asia	G1_Asia	TRUE
EPI_ISL_68651	A/Hong_Kong/1074/1997	G1_Asia	G1_Asia	TRUE
EPI_ISL_69733	A/Hong_Kong/33982/2009	G1_Asia	G1_Asia	TRUE
EPI_ISL_69734	A/Hong_Kong/35820/2009	G1_Asia	G1_Asia	TRUE
EPI_ISL_7288	A/partridge/Shantou/2875/2001	G1_Asia	G1_Asia	TRUE
EPI_ISL_1268	A/quail/Hong_Kong/G1/97	G1_Asia	G1_Asia	TRUE
EPI_ISL_11336	A/quail/Shantou/11195/2005	G1_Asia	G1_Asia	TRUE
EPI_ISL_11279	A/quail/Shantou/1235/2001	G1_Asia	G1_Asia	TRUE
EPI_ISL_11280	A/quail/Shantou/1242/2001	G1_Asia	G1_Asia	TRUE
EPI_ISL_11271	A/quail/Shantou/1310/2000	G1_Asia	G1_Asia	TRUE
EPI_ISL_11337	A/quail/Shantou/13425/2005	G1_Asia	G1_Asia	TRUE
EPI_ISL_11321	A/quail/Shantou/1475/2004	G1_Asia	G1_Asia	TRUE
EPI_ISL_11298	A/quail/Shantou/1551/2002	G1_Asia	G1_Asia	TRUE
EPI_ISL_11283	A/quail/Shantou/1555/2001	G1_Asia	G1_Asia	TRUE
EPI_ISL_11322	A/quail/Shantou/1865/2004	G1_Asia	G1_Asia	TRUE
EPI_ISL_11323	A/quail/Shantou/1883/2004	G1_Asia	G1_Asia	TRUE
EPI_ISL_11284	A/quail/Shantou/1912/2001	G1_Asia	G1_Asia	TRUE
EPI_ISL_11339	A/quail/Shantou/19506/2005	G1_Asia	G1_Asia	TRUE
EPI_ISL_11274	A/quail/Shantou/2061/2000	G1_Asia	G1_Asia	TRUE
EPI_ISL_11285	A/quail/Shantou/2111/2001	G1_Asia	G1_Asia	TRUE
EPI_ISL_11341	A/quail/Shantou/21605/2005	G1_Asia	G1_Asia	TRUE
EPI_ISL_11276	A/quail/Shantou/222/2001	G1_Asia	G1_Asia	TRUE
EPI_ISL_11286	A/quail/Shantou/2462/2001	G1_Asia	G1_Asia	TRUE
EPI_ISL_11275	A/quail/Shantou/2816/2000	G1_Asia	G1_Asia	TRUE
EPI_ISL_11310	A/quail/Shantou/3008/2003	G1_Asia	G1_Asia	TRUE
EPI_ISL_11324	A/quail/Shantou/3060/2004	G1_Asia	G1_Asia	TRUE
EPI_ISL_11303	A/quail/Shantou/308/2003	G1_Asia	G1_Asia	TRUE
EPI_ISL_11311	A/quail/Shantou/3308/2003	G1_Asia	G1_Asia	TRUE
EPI_ISL_11304	A/quail/Shantou/335/2003	G1_Asia	G1_Asia	TRUE
EPI_ISL_11314	A/quail/Shantou/3768/2003	G1_Asia	G1_Asia	TRUE
EPI_ISL_11299	A/quail/Shantou/3851/2002	G1_Asia	G1_Asia	TRUE
EPI_ISL_11320	A/quail/Shantou/403/2004	G1_Asia	G1_Asia	TRUE
EPI_ISL_11317	A/quail/Shantou/4044/2003	G1_Asia	G1_Asia	TRUE
EPI_ISL_11300	A/quail/Shantou/4203/2002	G1_Asia	G1_Asia	TRUE
EPI_ISL_11288	A/quail/Shantou/4641/2001	G1_Asia	G1_Asia	TRUE
EPI_ISL_11318	A/quail/Shantou/4850/2003	G1_Asia	G1_Asia	TRUE
EPI_ISL_11292	A/quail/Shantou/69/2002	G1_Asia	G1_Asia	TRUE
EPI_ISL_11270	A/quail/Shantou/782/2000	G1_Asia	G1_Asia	TRUE
EPI_ISL_1493	A/chicken/Germany/R45/98	G1_ME_A-like	G1_ME_A-like	TRUE
EPI_ISL_2850	A/chicken/Saudi_Arabia/AG516/2000	G1_ME_A-like	G1_ME_A-like	TRUE
EPI_ISL_80956	A/chicken/Saudi_Arabia/EPD-22-01/2002	G1_ME_A-like	G1_ME_A-like	TRUE
EPI_ISL_85783	A/quail/Saudi_Arabia/08vir3489-46-as104/2006	G1_ME_A-like	G1_ME_A-like	TRUE
EPI_ISL_63448	A/chicken/Iran/THLBM864/2007	G1_ME_B-D-like	G1_ME_B-D-like	TRUE
EPI_ISL_19625	A/avian/Israel/584/2005	G1_Mideast_A	G1_Mideast_A	TRUE
EPI_ISL_9494	A/chicken/Beit-Aran/29/05	G1_Mideast_A	G1_Mideast_A	TRUE
EPI_ISL_9488	A/chicken/Ein_Habsor/1808/04	G1_Mideast_A	G1_Mideast_A	TRUE
EPI_ISL_9474	A/chicken/Iarah/1376/03	G1_Mideast_A	G1_Mideast_A	TRUE
EPI_ISL_85797	A/chicken/Iraq/09vir579-8/2005	G1_Mideast_A	G1_Mideast_A	TRUE
EPI_ISL_63454	A/chicken/Israel/114/2007	G1_Mideast_A	G1_Mideast_A	TRUE
EPI_ISL_19621	A/chicken/Israel/178/2006	G1_Mideast_A	G1_Mideast_A	TRUE
EPI_ISL_10376	A/chicken/Israel/1953/2004	G1_Mideast_A	G1_Mideast_A	TRUE
EPI_ISL_10377	A/chicken/Israel/1966/2004	G1_Mideast_A	G1_Mideast_A	TRUE
EPI_ISL_19622	A/chicken/Israel/282/2005	G1_Mideast_A	G1_Mideast_A	TRUE
EPI_ISL_30443	A/chicken/Israel/375/2007	G1_Mideast_A	G1_Mideast_A	TRUE
EPI_ISL_19624	A/chicken/Israel/554/2005	G1_Mideast_A	G1_Mideast_A	TRUE
EPI_ISL_19620	A/chicken/Israel/793/2005	G1_Mideast_A	G1_Mideast_A	TRUE
EPI_ISL_19627	A/chicken/Israel/853/2005	G1_Mideast_A	G1_Mideast_A	TRUE
EPI_ISL_19629	A/chicken/Israel/909/2005	G1_Mideast_A	G1_Mideast_A	TRUE
EPI_ISL_85779	A/chicken/Jordan/09vir579-2/2007	G1_Mideast_A	G1_Mideast_A	TRUE
EPI_ISL_85778	A/chicken/Jordan/09vir579-3/2007	G1_Mideast_A	G1_Mideast_A	TRUE
EPI_ISL_85772	A/chicken/Jordan/1436-1451/2004	G1_Mideast_A	G1_Mideast_A	TRUE
EPI_ISL_85774	A/chicken/Jordan/1436-643/2004	G1_Mideast_A	G1_Mideast_A	TRUE
EPI_ISL_85775	A/chicken/Jordan/1436-997/2004	G1_Mideast_A	G1_Mideast_A	TRUE
EPI_ISL_9357	A/chicken/Maale_HaHamisha/90658/00	G1_Mideast_A	G1_Mideast_A	TRUE
EPI_ISL_68504	A/chicken/Middle_East/ED-1/1999	G1_Mideast_A	G1_Mideast_A	TRUE
EPI_ISL_9367	A/chicken/Pardes-Hana-Carcur/1475/03	G1_Mideast_A	G1_Mideast_A	TRUE
EPI_ISL_4534	A/chicken/Talmei_Elazar/1304/03	G1_Mideast_A	G1_Mideast_A	TRUE
EPI_ISL_3802	A/chicken/Tel_Adashim/786/01	G1_Mideast_A	G1_Mideast_A	TRUE
EPI_ISL_85773	A/duck/Jordan/1436-890/2004	G1_Mideast_A	G1_Mideast_A	TRUE
EPI_ISL_4535	A/ostrich/Eshkol/1436/03	G1_Mideast_A	G1_Mideast_A	TRUE
EPI_ISL_3794	A/turkey/Beit_HaLevi/1562/04	G1_Mideast_A	G1_Mideast_A	TRUE
EPI_ISL_9485	A/turkey/Bezat/89/05	G1_Mideast_A	G1_Mideast_A	TRUE
EPI_ISL_3795	A/turkey/Givat_Haim/965/02	G1_Mideast_A	G1_Mideast_A	TRUE
EPI_ISL_10375	A/turkey/Israel/1209/2003	G1_Mideast_A	G1_Mideast_A	TRUE
EPI_ISL_19623	A/turkey/Israel/425/2005	G1_Mideast_A	G1_Mideast_A	TRUE
EPI_ISL_19626	A/turkey/Israel/747/2005	G1_Mideast_A	G1_Mideast_A	TRUE
EPI_ISL_10373	A/turkey/Israel/810/2001	G1_Mideast_A	G1_Mideast_A	TRUE
EPI_ISL_19628	A/turkey/Israel/884/2005	G1_Mideast_A	G1_Mideast_A	TRUE
EPI_ISL_9505	A/turkey/Mishmar_Hasharon/619/02	G1_Mideast_A	G1_Mideast_A	TRUE
EPI_ISL_9342	A/turkey/Naharia/1013/02	G1_Mideast_A	G1_Mideast_A	TRUE
EPI_ISL_3790	A/turkey/Neve_Ilan/90710/00	G1_Mideast_A	G1_Mideast_A	TRUE
EPI_ISL_9481	A/turkey/Shadmot_Dvorah/1567/04	G1_Mideast_A	G1_Mideast_A	TRUE
EPI_ISL_62976	A/avian/Israel/313/2008	G1_Mideast_B	G1_Mideast_B	TRUE
EPI_ISL_62977	A/avian/Israel/314/2008	G1_Mideast_B	G1_Mideast_B	TRUE
EPI_ISL_80921	A/avian/Saudi_Arabia/910134/2006	G1_Mideast_B	G1_Mideast_B	TRUE
EPI_ISL_80922	A/avian/Saudi_Arabia/910135/2006	G1_Mideast_B	G1_Mideast_B	TRUE
EPI_ISL_80923	A/avian/Saudi_Arabia/910136/2006	G1_Mideast_B	G1_Mideast_B	TRUE
EPI_ISL_63781	A/chicken/Afghanistan/329-2vir09-AFG-Khost1/2008	G1_Mideast_B	G1_Mideast_B	TRUE
EPI_ISL_63782	A/chicken/Afghanistan/329-3vir09-AFG-Khost2/2008	G1_Mideast_B	G1_Mideast_B	TRUE
EPI_ISL_63783	A/chicken/Afghanistan/329-4vir09-AFG-Khost3/2008	G1_Mideast_B	G1_Mideast_B	TRUE
EPI_ISL_63784	A/chicken/Afghanistan/329-5vir09-AFG-Khost4/2008	G1_Mideast_B	G1_Mideast_B	TRUE
EPI_ISL_63785	A/chicken/Afghanistan/329-6vir09-AFG-Khost9/2008	G1_Mideast_B	G1_Mideast_B	TRUE
EPI_ISL_63786	A/chicken/Afghanistan/329-7vir09-AFG-Heart6/2009	G1_Mideast_B	G1_Mideast_B	TRUE
EPI_ISL_63787	A/chicken/Afghanistan/329-8vir09-AFG-Heart7/2009	G1_Mideast_B	G1_Mideast_B	TRUE
EPI_ISL_78703	A/chicken/Chandigarh/2048/2003	G1_Mideast_B	G1_Mideast_B	TRUE
EPI_ISL_85790	A/chicken/Dubai/09vir3771-3/2008	G1_Mideast_B	G1_Mideast_B	TRUE
EPI_ISL_78704	A/chicken/Gujarat/3697/2004	G1_Mideast_B	G1_Mideast_B	TRUE
EPI_ISL_27603	A/chicken/Gujarat/3724/2004	G1_Mideast_B	G1_Mideast_B	TRUE
EPI_ISL_27600	A/chicken/Haryana/2051/2003	G1_Mideast_B	G1_Mideast_B	TRUE
EPI_ISL_78705	A/chicken/Haryana/2424/2004	G1_Mideast_B	G1_Mideast_B	TRUE
EPI_ISL_97221	A/chicken/India/IVRI-0004/2010	G1_Mideast_B	G1_Mideast_B	TRUE
EPI_ISL_97215	A/chicken/India/IVRI-0011/2011	G1_Mideast_B	G1_Mideast_B	TRUE
EPI_ISL_85792	A/chicken/Iran/10VIR854-3/2009	G1_Mideast_B	G1_Mideast_B	TRUE
EPI_ISL_85794	A/chicken/Iran/10VIR854-4/2009	G1_Mideast_B	G1_Mideast_B	TRUE
EPI_ISL_85791	A/chicken/Iran/10VIR854-5/2008	G1_Mideast_B	G1_Mideast_B	TRUE
EPI_ISL_65650	A/chicken/Iran/133/2004	G1_Mideast_B	G1_Mideast_B	TRUE
EPI_ISL_64311	A/chicken/Iran/20/2006	G1_Mideast_B	G1_Mideast_B	TRUE
EPI_ISL_67377	A/chicken/Iran/320/2003	G1_Mideast_B	G1_Mideast_B	TRUE
EPI_ISL_64312	A/chicken/Iran/68/2006	G1_Mideast_B	G1_Mideast_B	TRUE
EPI_ISL_11184	A/chicken/Iran/B102/2005	G1_Mideast_B	G1_Mideast_B	TRUE
EPI_ISL_11185	A/chicken/Iran/B11A/2005	G1_Mideast_B	G1_Mideast_B	TRUE
EPI_ISL_11180	A/chicken/Iran/B308B/2004	G1_Mideast_B	G1_Mideast_B	TRUE
EPI_ISL_11186	A/chicken/Iran/B326/2005	G1_Mideast_B	G1_Mideast_B	TRUE
EPI_ISL_11182	A/chicken/Iran/B76/2004	G1_Mideast_B	G1_Mideast_B	TRUE
EPI_ISL_11183	A/chicken/Iran/B99/2005	G1_Mideast_B	G1_Mideast_B	TRUE
EPI_ISL_97042	A/chicken/Iran/EBGV-88/2010	G1_Mideast_B	G1_Mideast_B	TRUE
EPI_ISL_10545	A/chicken/Iran/L248/03	G1_Mideast_B	G1_Mideast_B	TRUE
EPI_ISL_63003	A/chicken/Iran/RZ28/2008	G1_Mideast_B	G1_Mideast_B	TRUE
EPI_ISL_63004	A/chicken/Iran/RZ36/2008	G1_Mideast_B	G1_Mideast_B	TRUE
EPI_ISL_63005	A/chicken/Iran/RZ37/2008	G1_Mideast_B	G1_Mideast_B	TRUE
EPI_ISL_63006	A/chicken/Iran/RZ42/2008	G1_Mideast_B	G1_Mideast_B	TRUE
EPI_ISL_63007	A/chicken/Iran/RZ53/2008	G1_Mideast_B	G1_Mideast_B	TRUE
EPI_ISL_63444	A/chicken/Iran/SH2/2007	G1_Mideast_B	G1_Mideast_B	TRUE
EPI_ISL_29276	A/chicken/Iran/SS2/2008	G1_Mideast_B	G1_Mideast_B	TRUE
EPI_ISL_15732	A/chicken/Iran/TH186/2007	G1_Mideast_B	G1_Mideast_B	TRUE
EPI_ISL_15730	A/chicken/Iran/TH286/2007	G1_Mideast_B	G1_Mideast_B	TRUE
EPI_ISL_15731	A/chicken/Iran/TH386/2007	G1_Mideast_B	G1_Mideast_B	TRUE
EPI_ISL_29274	A/chicken/Iran/TH486-masoumi/2007	G1_Mideast_B	G1_Mideast_B	TRUE
EPI_ISL_15729	A/chicken/Iran/TH85/2007	G1_Mideast_B	G1_Mideast_B	TRUE
EPI_ISL_63445	A/chicken/Iran/THLBM861/2007	G1_Mideast_B	G1_Mideast_B	TRUE
EPI_ISL_63446	A/chicken/Iran/THLBM862/2007	G1_Mideast_B	G1_Mideast_B	TRUE
EPI_ISL_63447	A/chicken/Iran/THLBM863/2007	G1_Mideast_B	G1_Mideast_B	TRUE
EPI_ISL_63449	A/chicken/Iran/THLBM865/2007	G1_Mideast_B	G1_Mideast_B	TRUE
EPI_ISL_63450	A/chicken/Iran/THLBM866/2007	G1_Mideast_B	G1_Mideast_B	TRUE
EPI_ISL_63451	A/chicken/Iran/THLBM867/2007	G1_Mideast_B	G1_Mideast_B	TRUE
EPI_ISL_63452	A/chicken/Iran/THLBM868/2007	G1_Mideast_B	G1_Mideast_B	TRUE
EPI_ISL_63453	A/chicken/Israel/1033/2007	G1_Mideast_B	G1_Mideast_B	TRUE
EPI_ISL_30437	A/chicken/Israel/1040/2007	G1_Mideast_B	G1_Mideast_B	TRUE
EPI_ISL_64314	A/chicken/Israel/1525/2006	G1_Mideast_B	G1_Mideast_B	TRUE
EPI_ISL_64315	A/chicken/Israel/1548/2006	G1_Mideast_B	G1_Mideast_B	TRUE
EPI_ISL_64316	A/chicken/Israel/1638/2006	G1_Mideast_B	G1_Mideast_B	TRUE
EPI_ISL_30439	A/chicken/Israel/182/2008	G1_Mideast_B	G1_Mideast_B	TRUE
EPI_ISL_30440	A/chicken/Israel/184/2009	G1_Mideast_B	G1_Mideast_B	TRUE
EPI_ISL_63455	A/chicken/Israel/215/2007	G1_Mideast_B	G1_Mideast_B	TRUE
EPI_ISL_63008	A/chicken/Israel/292/2008	G1_Mideast_B	G1_Mideast_B	TRUE
EPI_ISL_30441	A/chicken/Israel/310/2008	G1_Mideast_B	G1_Mideast_B	TRUE
EPI_ISL_30442	A/chicken/Israel/330/2008	G1_Mideast_B	G1_Mideast_B	TRUE
EPI_ISL_63456	A/chicken/Israel/386/2007	G1_Mideast_B	G1_Mideast_B	TRUE
EPI_ISL_63457	A/chicken/Israel/402/2007	G1_Mideast_B	G1_Mideast_B	TRUE
EPI_ISL_63458	A/chicken/Israel/449/2007	G1_Mideast_B	G1_Mideast_B	TRUE
EPI_ISL_63009	A/chicken/Israel/524/2008	G1_Mideast_B	G1_Mideast_B	TRUE
EPI_ISL_30438	A/chicken/Israel/54/2008	G1_Mideast_B	G1_Mideast_B	TRUE
EPI_ISL_30445	A/chicken/Israel/694/2008	G1_Mideast_B	G1_Mideast_B	TRUE
EPI_ISL_30446	A/chicken/Israel/702/2008	G1_Mideast_B	G1_Mideast_B	TRUE
EPI_ISL_63459	A/chicken/Israel/728/2007	G1_Mideast_B	G1_Mideast_B	TRUE
EPI_ISL_30447	A/chicken/Israel/869/2007	G1_Mideast_B	G1_Mideast_B	TRUE
EPI_ISL_30448	A/chicken/Israel/883/2008	G1_Mideast_B	G1_Mideast_B	TRUE
EPI_ISL_63460	A/chicken/Israel/933/2007	G1_Mideast_B	G1_Mideast_B	TRUE
EPI_ISL_30449	A/chicken/Israel/951/2007	G1_Mideast_B	G1_Mideast_B	TRUE
EPI_ISL_30450	A/chicken/Israel/953/2007	G1_Mideast_B	G1_Mideast_B	TRUE
EPI_ISL_85776	A/chicken/Jordan/436-1/2010	G1_Mideast_B	G1_Mideast_B	TRUE
EPI_ISL_85777	A/chicken/Jordan/436-2/2010	G1_Mideast_B	G1_Mideast_B	TRUE
EPI_ISL_85795	A/chicken/Kurdistan/4693-88/2009	G1_Mideast_B	G1_Mideast_B	TRUE
EPI_ISL_85796	A/chicken/Kurdistan/4693-9/2009	G1_Mideast_B	G1_Mideast_B	TRUE
EPI_ISL_78706	A/chicken/Orissa/2317/2004	G1_Mideast_B	G1_Mideast_B	TRUE
EPI_ISL_29787	A/chicken/Pakistan/UDL-01/2005	G1_Mideast_B	G1_Mideast_B	TRUE
EPI_ISL_29789	A/chicken/Pakistan/UDL-01/2006	G1_Mideast_B	G1_Mideast_B	TRUE
EPI_ISL_29785	A/chicken/Pakistan/UDL-01/2007	G1_Mideast_B	G1_Mideast_B	TRUE
EPI_ISL_29793	A/chicken/Pakistan/UDL-01/2008	G1_Mideast_B	G1_Mideast_B	TRUE
EPI_ISL_29788	A/chicken/Pakistan/UDL-02/2005	G1_Mideast_B	G1_Mideast_B	TRUE
EPI_ISL_29790	A/chicken/Pakistan/UDL-02/2006	G1_Mideast_B	G1_Mideast_B	TRUE
EPI_ISL_29794	A/chicken/Pakistan/UDL-02/2008	G1_Mideast_B	G1_Mideast_B	TRUE
EPI_ISL_29791	A/chicken/Pakistan/UDL-03/2005	G1_Mideast_B	G1_Mideast_B	TRUE
EPI_ISL_29795	A/chicken/Pakistan/UDL-03/2008	G1_Mideast_B	G1_Mideast_B	TRUE
EPI_ISL_29786	A/chicken/Pakistan/UDL-04/2006	G1_Mideast_B	G1_Mideast_B	TRUE
EPI_ISL_29796	A/chicken/Pakistan/UDL-04/2007	G1_Mideast_B	G1_Mideast_B	TRUE
EPI_ISL_27601	A/chicken/Punjab/2063/2003	G1_Mideast_B	G1_Mideast_B	TRUE
EPI_ISL_85798	A/chicken/Qatar/4576-4/2008	G1_Mideast_B	G1_Mideast_B	TRUE
EPI_ISL_85780	A/chicken/Saudi_Arabia/08vir3489-33-as638/2005	G1_Mideast_B	G1_Mideast_B	TRUE
EPI_ISL_85781	A/chicken/Saudi_Arabia/08vir3489-38-as92/2005	G1_Mideast_B	G1_Mideast_B	TRUE
EPI_ISL_85782	A/chicken/Saudi_Arabia/08vir3489-44-as253/2006	G1_Mideast_B	G1_Mideast_B	TRUE
EPI_ISL_85786	A/chicken/Saudi_Arabia/08vir3489-47-as215/2007	G1_Mideast_B	G1_Mideast_B	TRUE
EPI_ISL_85785	A/chicken/Saudi_Arabia/08vir3489-48-as997/2007	G1_Mideast_B	G1_Mideast_B	TRUE
EPI_ISL_85788	A/chicken/Saudi_Arabia/08vir3489-50-as118/2008	G1_Mideast_B	G1_Mideast_B	TRUE
EPI_ISL_85787	A/chicken/Saudi_Arabia/08vir3489-51-as366/2008	G1_Mideast_B	G1_Mideast_B	TRUE
EPI_ISL_83300	A/chicken/Tripura/105131/2008	G1_Mideast_B	G1_Mideast_B	TRUE
EPI_ISL_76225	A/chicken/Uchal/8286/2006	G1_Mideast_B	G1_Mideast_B	TRUE
EPI_ISL_76224	A/chicken/Uchal/8293/2006	G1_Mideast_B	G1_Mideast_B	TRUE
EPI_ISL_27602	A/chicken/Uttar_Pradesh/2543/2004	G1_Mideast_B	G1_Mideast_B	TRUE
EPI_ISL_78707	A/chicken/Uttar_Pradesh/2544/2004	G1_Mideast_B	G1_Mideast_B	TRUE
EPI_ISL_85784	A/falcon/Saudi_Arabia/08vir3489-40-as977/2006	G1_Mideast_B	G1_Mideast_B	TRUE
EPI_ISL_93285	A/quail/Lebanon/272/2010	G1_Mideast_B	G1_Mideast_B	TRUE
EPI_ISL_93286	A/quail/Lebanon/273/2010	G1_Mideast_B	G1_Mideast_B	TRUE
EPI_ISL_64478	A/turkey/Israel/1608/2006	G1_Mideast_B	G1_Mideast_B	TRUE
EPI_ISL_30444	A/turkey/Israel/689/2008	G1_Mideast_B	G1_Mideast_B	TRUE
EPI_ISL_63640	A/turkey/Israel/900/2007	G1_Mideast_B	G1_Mideast_B	TRUE
EPI_ISL_69121	A/watercoot/Haryana/5844/2005	G1_Mideast_B	G1_Mideast_B	TRUE
EPI_ISL_11172	A/chicken/Dubai/338/2001	G1_Mideast_C	G1_Mideast_C	TRUE
EPI_ISL_11173	A/chicken/Dubai/339/2001	G1_Mideast_C	G1_Mideast_C	TRUE
EPI_ISL_11174	A/chicken/Dubai/383/2002	G1_Mideast_C	G1_Mideast_C	TRUE
EPI_ISL_11175	A/chicken/Dubai/463/2003	G1_Mideast_C	G1_Mideast_C	TRUE
EPI_ISL_83544	A/chicken/Emirates/R66/2002	G1_Mideast_C	G1_Mideast_C	TRUE
EPI_ISL_2848	A/chicken/United_Arab_Emirates/AG537/99	G1_Mideast_C	G1_Mideast_C	TRUE
EPI_ISL_11169	A/quail/Dubai/301/2000	G1_Mideast_C	G1_Mideast_C	TRUE
EPI_ISL_11170	A/quail/Dubai/302/2000	G1_Mideast_C	G1_Mideast_C	TRUE
EPI_ISL_11171	A/quail/Dubai/303/2000	G1_Mideast_C	G1_Mideast_C	TRUE
EPI_ISL_85793	A/chicken/Iran/10VIR854-1/2002	G1_Mideast_D	G1_Mideast_D	TRUE
EPI_ISL_64828	A/chicken/Iran/119/2005	G1_Mideast_D	G1_Mideast_D	TRUE
EPI_ISL_1498	A/chicken/Iran/11T/99	G1_Mideast_D	G1_Mideast_D	TRUE
EPI_ISL_65651	A/chicken/Iran/152/2004	G1_Mideast_D	G1_Mideast_D	TRUE
EPI_ISL_68019	A/chicken/Iran/233/2001	G1_Mideast_D	G1_Mideast_D	TRUE
EPI_ISL_67727	A/chicken/Iran/284/2002	G1_Mideast_D	G1_Mideast_D	TRUE
EPI_ISL_68020	A/chicken/Iran/450/2001	G1_Mideast_D	G1_Mideast_D	TRUE
EPI_ISL_67728	A/chicken/Iran/466/2002	G1_Mideast_D	G1_Mideast_D	TRUE
EPI_ISL_68363	A/chicken/Iran/565/2000	G1_Mideast_D	G1_Mideast_D	TRUE
EPI_ISL_68364	A/chicken/Iran/584/2000	G1_Mideast_D	G1_Mideast_D	TRUE
EPI_ISL_68591	A/chicken/Iran/661/1998	G1_Mideast_D	G1_Mideast_D	TRUE
EPI_ISL_68592	A/chicken/Iran/698/1998	G1_Mideast_D	G1_Mideast_D	TRUE
EPI_ISL_68496	A/chicken/Iran/705/1999	G1_Mideast_D	G1_Mideast_D	TRUE
EPI_ISL_68497	A/chicken/Iran/772/1999	G1_Mideast_D	G1_Mideast_D	TRUE
EPI_ISL_64829	A/chicken/Iran/86/2005	G1_Mideast_D	G1_Mideast_D	TRUE
EPI_ISL_67378	A/chicken/Iran/92/2003	G1_Mideast_D	G1_Mideast_D	TRUE
EPI_ISL_2849	A/chicken/Iran/AG541/2000	G1_Mideast_D	G1_Mideast_D	TRUE
EPI_ISL_11177	A/chicken/Iran/B263/2003	G1_Mideast_D	G1_Mideast_D	TRUE
EPI_ISL_11179	A/chicken/Iran/B308A/2004	G1_Mideast_D	G1_Mideast_D	TRUE
EPI_ISL_11178	A/chicken/Iran/B314/2003	G1_Mideast_D	G1_Mideast_D	TRUE
EPI_ISL_11181	A/chicken/Iran/B322/2004	G1_Mideast_D	G1_Mideast_D	TRUE
EPI_ISL_11176	A/chicken/Iran/L252/2003	G1_Mideast_D	G1_Mideast_D	TRUE
EPI_ISL_63443	A/chicken/Iran/SH1/2007	G1_Mideast_D	G1_Mideast_D	TRUE
EPI_ISL_29275	A/chicken/Iran/SS1/1998	G1_Mideast_D	G1_Mideast_D	TRUE
EPI_ISL_15728	A/chicken/Iran/TH77/1998	G1_Mideast_D	G1_Mideast_D	TRUE
EPI_ISL_15734	A/chicken/Iran/TH78/1999	G1_Mideast_D	G1_Mideast_D	TRUE
EPI_ISL_15735	A/chicken/Iran/TH79/2000	G1_Mideast_D	G1_Mideast_D	TRUE
EPI_ISL_15736	A/chicken/Iran/TH80/2000	G1_Mideast_D	G1_Mideast_D	TRUE
EPI_ISL_15733	A/chicken/Iran/TH81/2002	G1_Mideast_D	G1_Mideast_D	TRUE
EPI_ISL_87538	A/chicken/Saudi_Arabia/CP7/1998	G1_Mideast_D	G1_Mideast_D	TRUE
EPI_ISL_2910	A/feral_duck/Iran/G94/03	G1_Mideast_D	G1_Mideast_D	TRUE
EPI_ISL_86198	A/garganey/Iran/K8/2003	G1_Mideast_D	G1_Mideast_D	TRUE
EPI_ISL_127	A/parakeet/Chiba/1/97	G1_Mideast_D	G1_Mideast_D	TRUE
EPI_ISL_128	A/parakeet/Narita/92A/98	G1_Mideast_D	G1_Mideast_D	TRUE
EPI_ISL_2909	A/shovelar/Iran/G54/03	G1_Mideast_D	G1_Mideast_D	TRUE
EPI_ISL_1501	A/chicken/Pakistan/2/99	G1_PK519	G1_PK519	TRUE
EPI_ISL_1503	A/chicken/Pakistan/4/99	G1_PK519	G1_PK519	TRUE
EPI_ISL_1504	A/chicken/Pakistan/5/99	G1_PK519	G1_PK519	TRUE
EPI_ISL_2847	A/chicken/Pakistan/AG519/98	G1_PK519	G1_PK519	TRUE
EPI_ISL_3213	A/duck/Hong_Kong/147/77	HK147	HK147	TRUE
EPI_ISL_1272	A/duck/Hong_Kong/168/77	HK147	HK147	TRUE
EPI_ISL_2307	A/duck/Hong_Kong/289/78	HK147	HK147	TRUE
EPI_ISL_2308	A/duck/Hong_Kong/552/79	HK147	HK147	TRUE
EPI_ISL_2310	A/duck/Hong_Kong/610/79	HK147	HK147	TRUE
EPI_ISL_69882	A/duck/Hong_Kong/702/1979-quail_adapted	HK147	HK147	TRUE
EPI_ISL_139	A/duck/Hong_Kong/702/79	HK147	HK147	TRUE
EPI_ISL_2309	A/duck/Hong_Kong/86/76	HK147	HK147	TRUE
EPI_ISL_8942	A/duck/NZL/76/1984	HK147	HK147	TRUE
EPI_ISL_2311	A/duck/Hong_Kong/366/78	HK448	HK448	TRUE
EPI_ISL_138	A/duck/Hong_Kong/448/78	HK448	HK448	TRUE
EPI_ISL_3217	A/duck/Hong_Kong/644/79	HK448	HK448	TRUE
EPI_ISL_1273	A/duck/Hong_Kong/784/1979	HK448	HK448	TRUE
EPI_ISL_3214	A/quail/Hong_Kong/A28945/88	HK448	HK448	TRUE
EPI_ISL_1271	A/quail/Hong_Kong/AF157/92	HK448	HK448	TRUE
EPI_ISL_244	A/duck/Hokkaido/49/98	HK-like	HK-like	TRUE
EPI_ISL_1267	A/duck/Hong_Kong/Y439/97	HK-like	HK-like	TRUE
EPI_ISL_10141	A/chicken/Cheongju/ADL0401/2004	KR38349	KR38349	TRUE
EPI_ISL_13845	A/chicken/Korea/01310/2001	KR38349	KR38349	TRUE
EPI_ISL_10526	A/chicken/Korea/164/04	KR38349	KR38349	TRUE
EPI_ISL_1275	A/chicken/Korea/25232-96006/96	KR38349	KR38349	TRUE
EPI_ISL_1274	A/chicken/Korea/38349-p96323/96	KR38349	KR38349	TRUE
EPI_ISL_77209	A/chicken/Korea/A170/2009	KR38349	KR38349	TRUE
EPI_ISL_70424	A/chicken/Korea/ADL050895/2005	KR38349	KR38349	TRUE
EPI_ISL_70425	A/chicken/Korea/ADL060050/2006	KR38349	KR38349	TRUE
EPI_ISL_70426	A/chicken/Korea/ADL060162/2006	KR38349	KR38349	TRUE
EPI_ISL_70427	A/chicken/Korea/ADL060168/2006	KR38349	KR38349	TRUE
EPI_ISL_70428	A/chicken/Korea/ADL060196/2006	KR38349	KR38349	TRUE
EPI_ISL_70429	A/chicken/Korea/ADL060580/2006	KR38349	KR38349	TRUE
EPI_ISL_70439	A/chicken/Korea/ADL060831/2006	KR38349	KR38349	TRUE
EPI_ISL_70430	A/chicken/Korea/ADL060845/2006	KR38349	KR38349	TRUE
EPI_ISL_70431	A/chicken/Korea/ADL060865/2006	KR38349	KR38349	TRUE
EPI_ISL_70432	A/chicken/Korea/ADL062128/2006	KR38349	KR38349	TRUE
EPI_ISL_70433	A/chicken/Korea/ADL062203/2006	KR38349	KR38349	TRUE
EPI_ISL_70434	A/chicken/Korea/ADL070097/2007	KR38349	KR38349	TRUE
EPI_ISL_70438	A/chicken/Korea/ADL070121/2007	KR38349	KR38349	TRUE
EPI_ISL_70435	A/chicken/Korea/ADL070575/2007	KR38349	KR38349	TRUE
EPI_ISL_70436	A/chicken/Korea/ADL070801/2007	KR38349	KR38349	TRUE
EPI_ISL_70440	A/chicken/Korea/ADL071783/2007	KR38349	KR38349	TRUE
EPI_ISL_68688	A/chicken/Korea/AI-96004/1996	KR38349	KR38349	TRUE
EPI_ISL_86563	A/chicken/Korea/GH2/2007	KR38349	KR38349	TRUE
EPI_ISL_84597	A/chicken/Korea/HC0410/2009	KR38349	KR38349	TRUE
EPI_ISL_84582	A/chicken/Korea/HC09/2009	KR38349	KR38349	TRUE
EPI_ISL_98913	A/chicken/Korea/KNUGJ09/2009	KR38349	KR38349	TRUE
EPI_ISL_98908	A/chicken/Korea/KNUSWR09/2009	KR38349	KR38349	TRUE
EPI_ISL_1446	A/chicken/Korea/MS96/96	KR38349	KR38349	TRUE
EPI_ISL_68689	A/chicken/Korea/MS96-CE6/1996	KR38349	KR38349	TRUE
EPI_ISL_4618	A/chicken/Korea/S1/2003	KR38349	KR38349	TRUE
EPI_ISL_4675	A/chicken/Korea/S18/03	KR38349	KR38349	TRUE
EPI_ISL_9886	A/chicken/Korea/S21/04	KR38349	KR38349	TRUE
EPI_ISL_4668	A/chicken/Korea/S4/03	KR38349	KR38349	TRUE
EPI_ISL_84581	A/chicken/Korea/SH0802/2008	KR38349	KR38349	TRUE
EPI_ISL_84583	A/chicken/Korea/SH0902/2009	KR38349	KR38349	TRUE
EPI_ISL_84584	A/chicken/Korea/SH0903/2009	KR38349	KR38349	TRUE
EPI_ISL_84586	A/chicken/Korea/SH0905/2009	KR38349	KR38349	TRUE
EPI_ISL_84587	A/chicken/Korea/SH0906/2009	KR38349	KR38349	TRUE
EPI_ISL_84588	A/chicken/Korea/SH0907/2009	KR38349	KR38349	TRUE
EPI_ISL_84591	A/chicken/Korea/SH0910/2009	KR38349	KR38349	TRUE
EPI_ISL_84592	A/chicken/Korea/SH0911/2009	KR38349	KR38349	TRUE
EPI_ISL_84594	A/chicken/Korea/SH0913/2009	KR38349	KR38349	TRUE
EPI_ISL_84595	A/chicken/Korea/SH0914/2009	KR38349	KR38349	TRUE
EPI_ISL_77207	A/duck/Korea/A174/2009	KR38349	KR38349	TRUE
EPI_ISL_98907	A/duck/Korea/KNUDPJ09/2009	KR38349	KR38349	TRUE
EPI_ISL_4671	A/duck/Korea/S13/03	KR38349	KR38349	TRUE
EPI_ISL_84585	A/duck/Korea/SH0904/2009	KR38349	KR38349	TRUE
EPI_ISL_84589	A/duck/Korea/SH0908/2009	KR38349	KR38349	TRUE
EPI_ISL_84590	A/duck/Korea/SH0909/2009	KR38349	KR38349	TRUE
EPI_ISL_84593	A/duck/Korea/SH0912/2009	KR38349	KR38349	TRUE
EPI_ISL_84596	A/duck/Korea/SH0915/2009	KR38349	KR38349	TRUE
EPI_ISL_12597	A/Korea/KBNP-0028/2000	KR38349	KR38349	TRUE
EPI_ISL_95865	A/Korean_native_chicken/Korea/K040110/2010	KR38349	KR38349	TRUE
EPI_ISL_4617	A/swine/Korea/S452/2004	KR38349	KR38349	TRUE
EPI_ISL_1279	A/goose/Minnesota/5733/80	MN5733	MN5733	TRUE
EPI_ISL_8950	A/goose/MN/5733-1/1980	MN5733	MN5733	TRUE
EPI_ISL_8787	A/knot/DE/2552/1987	MN5733	MN5733	TRUE
EPI_ISL_5800	A/laughing_gull/Delaware/2718/1987	MN5733	MN5733	TRUE
EPI_ISL_99482	A/laughing_gull/Delaware/2971/1988	MN5733	MN5733	TRUE
EPI_ISL_99500	A/laughing_gull/Delaware_Bay/2718/1987	MN5733	MN5733	TRUE
EPI_ISL_8884	A/mallard/ALB/17/1991	MN5733	MN5733	TRUE
EPI_ISL_5801	A/mallard/Alberta/11/1991	MN5733	MN5733	TRUE
EPI_ISL_4067	A/mallard/Alberta/11/91	MN5733	MN5733	TRUE
EPI_ISL_4053	A/mallard/Alberta/17/91	MN5733	MN5733	TRUE
EPI_ISL_4065	A/mallard/Alberta/321/88	MN5733	MN5733	TRUE
EPI_ISL_4047	A/mallard/Alberta/743/83	MN5733	MN5733	TRUE
EPI_ISL_8883	A/mallard_duck/ALB/321/1988	MN5733	MN5733	TRUE
EPI_ISL_8776	A/mallard_duck/ALB/396/1983	MN5733	MN5733	TRUE
EPI_ISL_8818	A/mallard_duck/ALB/506/1983	MN5733	MN5733	TRUE
EPI_ISL_8878	A/mallard_duck/ALB/743/1983	MN5733	MN5733	TRUE
EPI_ISL_85214	A/northern_shoveler/Interior_Alaska/8BM3470/2008	MN5733	MN5733	TRUE
EPI_ISL_95382	A/northern_shoveler/Missouri/298/2009	MN5733	MN5733	TRUE
EPI_ISL_8880	A/ruddy_turnstone/DE/2576/1987	MN5733	MN5733	TRUE
EPI_ISL_8881	A/ruddy_turnstone/DE/2731/1987	MN5733	MN5733	TRUE
EPI_ISL_8882	A/ruddy_turnstone/DE/510/1988	MN5733	MN5733	TRUE
EPI_ISL_8805	A/ruddy_turnstone/DE/773/1988	MN5733	MN5733	TRUE
EPI_ISL_99499	A/ruddy_turnstone/Delaware_Bay/2774/1987	MN5733	MN5733	TRUE
EPI_ISL_99498	A/ruddy_turnstone/Delaware_Bay/2795/1987	MN5733	MN5733	TRUE
EPI_ISL_99497	A/ruddy_turnstone/Delaware_Bay/2830/1987	MN5733	MN5733	TRUE
EPI_ISL_99486	A/ruddy_turnstone/Virginia/2297/1988	MN5733	MN5733	TRUE
EPI_ISL_23346	A/turkey/TX/10-49-89/1989	MN5733	MN5733	TRUE
EPI_ISL_23347	A/turkey/TX/4-1-81/1981	MN5733	MN5733	TRUE
EPI_ISL_102521	A/duck/Malaysia/20/1998	MY91	MY91	TRUE
EPI_ISL_96739	A/duck/Malaysia/2001	MY91	MY91	TRUE
EPI_ISL_102522	A/duck/Malaysia/91/1997	MY91	MY91	TRUE
EPI_ISL_30817	A/Bewicks_swan/Netherlands/5/2007	PV46B	PV46B	TRUE
EPI_ISL_64643	A/Eurasian_wigeon/Netherlands/3/2005	PV46B	PV46B	TRUE
EPI_ISL_78757	A/Eurasian_wigeon/Netherlands/4/2005	PV46B	PV46B	TRUE
EPI_ISL_647	A/mallard/Ireland/PV46B/1993	PV46B	PV46B	TRUE
EPI_ISL_30796	A/pink-footed_goose/Netherlands/1/2006	PV46B	PV46B	TRUE
EPI_ISL_99360	A/ruddy_turnstone/Delaware_Bay/261/1999	PV46B	PV46B	TRUE
EPI_ISL_2844	A/turkey/Germany/R113/95	PV46B	PV46B	TRUE
EPI_ISL_2845	A/turkey/Germany/R22/96	PV46B	PV46B	TRUE
EPI_ISL_2843	A/turkey/Germany/R90/95	PV46B	PV46B	TRUE
EPI_ISL_82479	A/common_murre/Oregon/19497-004/2005	SB261	SB261	TRUE
EPI_ISL_8788	A/laughing_gull/DE/5/2003	SB261	SB261	TRUE
EPI_ISL_30815	A/laughing_gull/Delaware/12/2006	SB261	SB261	TRUE
EPI_ISL_99339	A/laughing_gull/Delaware_Bay/5/2003	SB261	SB261	TRUE
EPI_ISL_67414	A/ruddy_turnstone/Delaware/114/2003	SB261	SB261	TRUE
EPI_ISL_30816	A/sanderling/Delaware/482/2006	SB261	SB261	TRUE
EPI_ISL_8888	A/shorebird/DE/261/2003	SB261	SB261	TRUE
EPI_ISL_33862	A/shorebird/Delaware/249/2006	SB261	SB261	TRUE
EPI_ISL_84624	A/shorebird/Delaware/554/2007	SB261	SB261	TRUE
EPI_ISL_99338	A/shorebird/Delaware_Bay/127/2003	SB261	SB261	TRUE
EPI_ISL_99337	A/shorebird/Delaware_Bay/246/2003	SB261	SB261	TRUE
EPI_ISL_99336	A/shorebird/Delaware_Bay/283/2003	SB261	SB261	TRUE
EPI_ISL_99507	A/shorebird/Delaware_Bay/73/2003	SB261	SB261	TRUE
EPI_ISL_70180	A/duck/Vietnam/OIE-2313/2009	VN222	VN222	TRUE
EPI_ISL_70181	A/duck/Vietnam/OIE-2327/2009	VN222	VN222	TRUE
EPI_ISL_76652	A/duck/Vietnam/OIE-2334/2010	VN222	VN222	TRUE
EPI_ISL_94964	A/bar-tailed_godwit/Stockton/11204/2008	VN340	VN340	TRUE
EPI_ISL_94965	A/black_swan/Morpeth/194/2008	VN340	VN340	TRUE
EPI_ISL_247	A/duck/Hokkaido/13/00	VN340	VN340	TRUE
EPI_ISL_28844	A/duck/Hokkaido/238/2008	VN340	VN340	TRUE
EPI_ISL_246	A/duck/Hokkaido/26/99	VN340	VN340	TRUE
EPI_ISL_16165	A/duck/Hokkaido/294/2006	VN340	VN340	TRUE
EPI_ISL_243	A/duck/Hokkaido/31/97	VN340	VN340	TRUE
EPI_ISL_245	A/duck/Hokkaido/9/99	VN340	VN340	TRUE
EPI_ISL_24455	A/duck/Hokkaido/HY57/2005	VN340	VN340	TRUE
EPI_ISL_16173	A/duck/Hokkaido/W299/2006	VN340	VN340	TRUE
EPI_ISL_67395	A/duck/Mongolia/564/2003	VN340	VN340	TRUE
EPI_ISL_94958	A/duck/Newcastle/75/2007	VN340	VN340	TRUE
EPI_ISL_2312	A/duck/Shantou/1588/00	VN340	VN340	TRUE
EPI_ISL_7403	A/duck/Shantou/163/2004	VN340	VN340	TRUE
EPI_ISL_2313	A/duck/Shantou/2030/00	VN340	VN340	TRUE
EPI_ISL_7405	A/duck/Shantou/7488/2004	VN340	VN340	TRUE
EPI_ISL_11897	A/duck/Viet_Nam/340/2001	VN340	VN340	TRUE
EPI_ISL_11896	A/duck/Viet_Nam/68/2001	VN340	VN340	TRUE
EPI_ISL_94952	A/eastern_curlew/Stockton/4204/2008	VN340	VN340	TRUE
EPI_ISL_94951	A/eastern_curlew/Stockton/61/2007	VN340	VN340	TRUE
EPI_ISL_94950	A/eastern_curlew/Stockton/7204/2008	VN340	VN340	TRUE
EPI_ISL_33856	A/gadwall/Netherlands/1/2006	VN340	VN340	TRUE
EPI_ISL_63525	A/mallard/Austria/WV1090234/2007	VN340	VN340	TRUE
EPI_ISL_98893	A/mallard/France/090360/2009	VN340	VN340	TRUE
EPI_ISL_86201	A/mallard/Iran/T366/2007	VN340	VN340	TRUE
EPI_ISL_86202	A/mallard/Iran/T370/2007	VN340	VN340	TRUE
EPI_ISL_77452	A/mallard/PT/27972-B139/2007	VN340	VN340	TRUE
EPI_ISL_63561	A/mallard/Switzerland/WV1070800/2007	VN340	VN340	TRUE
EPI_ISL_63562	A/mallard/Switzerland/WV1070805/2007	VN340	VN340	TRUE
EPI_ISL_63101	A/mallard/Switzerland/WV1080875/2008	VN340	VN340	TRUE
EPI_ISL_63563	A/mallard/Switzerland/WV3080008/2007	VN340	VN340	TRUE
EPI_ISL_63104	A/mallard/Switzerland/WV3080036/2008	VN340	VN340	TRUE
EPI_ISL_1488	A/ostrich/South_Africa/9508103/95	VN340	VN340	TRUE
EPI_ISL_74027	A/ostrich/South_Africa/AI1586/2008	VN340	VN340	TRUE
EPI_ISL_88233	A/pelican/Zambia/13/2009	VN340	VN340	TRUE
EPI_ISL_94946	A/teal/Newcastle/96/2007	VN340	VN340	TRUE
EPI_ISL_10379	A/teal/Primorie/3628/02	VN340	VN340	TRUE
EPI_ISL_10380	A/teal/Primorie/3631/02	VN340	VN340	TRUE
EPI_ISL_63634	A/teal/Switzerland/WV1070694/2007	VN340	VN340	TRUE
EPI_ISL_8504	A/chicken/Heilongjiang/35/00	WI66	WI66	TRUE
EPI_ISL_68589	A/chicken/Heilongjiang/u/1998	WI66	WI66	TRUE
EPI_ISL_1280	A/turkey/California/189/66	WI66	WI66	TRUE
EPI_ISL_70131	A/turkey/Wisconsin/1/1966	WI66	WI66	TRUE
EPI_ISL_70003	A/turkey/Wisconsin/1966	WI66	WI66	TRUE
EPI_ISL_70132	A/turkey/Wisconsin/66	WI66	WI66	TRUE
EPI_ISL_97757	A/chicken/Anhui/A21-2/2011	Y280_Fuj_SL6	Y280_Fuj_SL6	TRUE
EPI_ISL_89749	A/chicken/Fujian/SL6/2011	Y280_Fuj_SL6	Y280_Fuj_SL6	TRUE
EPI_ISL_97658	A/chicken/Guangdong/265/2011	Y280_Fuj_SL6	Y280_Fuj_SL6	TRUE
EPI_ISL_97659	A/chicken/Guangdong/283/2011	Y280_Fuj_SL6	Y280_Fuj_SL6	TRUE
EPI_ISL_97657	A/chicken/Guangdong/286/2011	Y280_Fuj_SL6	Y280_Fuj_SL6	TRUE
EPI_ISL_89735	A/chicken/Guangdong/CJZ/2011	Y280_Fuj_SL6	Y280_Fuj_SL6	TRUE
EPI_ISL_99612	A/chicken/Guangdong/FJC07/2011	Y280_Fuj_SL6	Y280_Fuj_SL6	TRUE
EPI_ISL_89745	A/chicken/Guangdong/FLS/2011	Y280_Fuj_SL6	Y280_Fuj_SL6	TRUE
EPI_ISL_89721	A/chicken/Guangdong/FZH/2011	Y280_Fuj_SL6	Y280_Fuj_SL6	TRUE
EPI_ISL_89748	A/chicken/Guangdong/HBQ/2011	Y280_Fuj_SL6	Y280_Fuj_SL6	TRUE
EPI_ISL_99607	A/chicken/Guangdong/HMZ11/2011	Y280_Fuj_SL6	Y280_Fuj_SL6	TRUE
EPI_ISL_89747	A/chicken/Guangdong/HXK/2011	Y280_Fuj_SL6	Y280_Fuj_SL6	TRUE
EPI_ISL_89744	A/chicken/Guangdong/HYF/2011	Y280_Fuj_SL6	Y280_Fuj_SL6	TRUE
EPI_ISL_89718	A/chicken/Guangdong/LHY/2011	Y280_Fuj_SL6	Y280_Fuj_SL6	TRUE
EPI_ISL_89739	A/chicken/Guangdong/LJD/2011	Y280_Fuj_SL6	Y280_Fuj_SL6	TRUE
EPI_ISL_89743	A/chicken/Guangdong/LJH/2011	Y280_Fuj_SL6	Y280_Fuj_SL6	TRUE
EPI_ISL_99620	A/chicken/Guangdong/LJJ03/2011	Y280_Fuj_SL6	Y280_Fuj_SL6	TRUE
EPI_ISL_89724	A/chicken/Guangdong/LMQ/2011	Y280_Fuj_SL6	Y280_Fuj_SL6	TRUE
EPI_ISL_89717	A/chicken/Guangdong/LSD/2011	Y280_Fuj_SL6	Y280_Fuj_SL6	TRUE
EPI_ISL_89712	A/chicken/Guangdong/LWQ/2010	Y280_Fuj_SL6	Y280_Fuj_SL6	TRUE
EPI_ISL_89722	A/chicken/Guangdong/LYL/2011	Y280_Fuj_SL6	Y280_Fuj_SL6	TRUE
EPI_ISL_89725	A/chicken/Guangdong/LYQ/2011	Y280_Fuj_SL6	Y280_Fuj_SL6	TRUE
EPI_ISL_89746	A/chicken/Guangdong/LZQ/2011	Y280_Fuj_SL6	Y280_Fuj_SL6	TRUE
EPI_ISL_89732	A/chicken/Guangdong/MYS/2011	Y280_Fuj_SL6	Y280_Fuj_SL6	TRUE
EPI_ISL_89719	A/chicken/Guangdong/QZL/2011	Y280_Fuj_SL6	Y280_Fuj_SL6	TRUE
EPI_ISL_89716	A/chicken/Guangdong/SK/2011	Y280_Fuj_SL6	Y280_Fuj_SL6	TRUE
EPI_ISL_99608	A/chicken/Guangdong/SQL11/2011	Y280_Fuj_SL6	Y280_Fuj_SL6	TRUE
EPI_ISL_89706	A/chicken/Guangdong/U4/2010	Y280_Fuj_SL6	Y280_Fuj_SL6	TRUE
EPI_ISL_89705	A/chicken/Guangdong/U5/2010	Y280_Fuj_SL6	Y280_Fuj_SL6	TRUE
EPI_ISL_89720	A/chicken/Guangdong/WGH/2011	Y280_Fuj_SL6	Y280_Fuj_SL6	TRUE
EPI_ISL_89731	A/chicken/Guangdong/YJX/2011	Y280_Fuj_SL6	Y280_Fuj_SL6	TRUE
EPI_ISL_98866	A/chicken/Guangdong/ZCY/2011	Y280_Fuj_SL6	Y280_Fuj_SL6	TRUE
EPI_ISL_89713	A/chicken/Guangdong/ZDR/2010	Y280_Fuj_SL6	Y280_Fuj_SL6	TRUE
EPI_ISL_98865	A/chicken/Guangdong/ZHJ/2011	Y280_Fuj_SL6	Y280_Fuj_SL6	TRUE
EPI_ISL_89728	A/chicken/Guangdong/ZPY/2011	Y280_Fuj_SL6	Y280_Fuj_SL6	TRUE
EPI_ISL_99609	A/chicken/Guangxi/QCR10/2011	Y280_Fuj_SL6	Y280_Fuj_SL6	TRUE
EPI_ISL_89741	A/chicken/Guangxi/WSL/2011	Y280_Fuj_SL6	Y280_Fuj_SL6	TRUE
EPI_ISL_98014	A/chicken/Guizhou/B11/2011	Y280_Fuj_SL6	Y280_Fuj_SL6	TRUE
EPI_ISL_97704	A/chicken/Guizhou/B26/2011	Y280_Fuj_SL6	Y280_Fuj_SL6	TRUE
EPI_ISL_98012	A/chicken/Guizhou/E11/2011	Y280_Fuj_SL6	Y280_Fuj_SL6	TRUE
EPI_ISL_98011	A/chicken/Guizhou/G12/2011	Y280_Fuj_SL6	Y280_Fuj_SL6	TRUE
EPI_ISL_97702	A/chicken/Guizhou/G12-2/2011	Y280_Fuj_SL6	Y280_Fuj_SL6	TRUE
EPI_ISL_98010	A/chicken/Guizhou/G17/2011	Y280_Fuj_SL6	Y280_Fuj_SL6	TRUE
EPI_ISL_98009	A/chicken/Guizhou/G22/2011	Y280_Fuj_SL6	Y280_Fuj_SL6	TRUE
EPI_ISL_98008	A/chicken/Guizhou/G23/2011	Y280_Fuj_SL6	Y280_Fuj_SL6	TRUE
EPI_ISL_98007	A/chicken/Guizhou/H24/2011	Y280_Fuj_SL6	Y280_Fuj_SL6	TRUE
EPI_ISL_99610	A/chicken/Guizhou/HCF09/2011	Y280_Fuj_SL6	Y280_Fuj_SL6	TRUE
EPI_ISL_99611	A/chicken/Guizhou/LCY09/2011	Y280_Fuj_SL6	Y280_Fuj_SL6	TRUE
EPI_ISL_98000	A/chicken/Hainan/I22/2011	Y280_Fuj_SL6	Y280_Fuj_SL6	TRUE
EPI_ISL_97999	A/chicken/Hainan/I28/2011	Y280_Fuj_SL6	Y280_Fuj_SL6	TRUE
EPI_ISL_97998	A/chicken/Hainan/I7/2011	Y280_Fuj_SL6	Y280_Fuj_SL6	TRUE
EPI_ISL_97688	A/chicken/Ningxia/181/2011	Y280_Fuj_SL6	Y280_Fuj_SL6	TRUE
EPI_ISL_97687	A/chicken/Ningxia/182/2011	Y280_Fuj_SL6	Y280_Fuj_SL6	TRUE
EPI_ISL_97685	A/chicken/Ningxia/184/2011	Y280_Fuj_SL6	Y280_Fuj_SL6	TRUE
EPI_ISL_13014	A/bird/Guangxi/62/2005	Y280_G9	Y280_G9	TRUE
EPI_ISL_13015	A/bird/Guangxi/63/2005	Y280_G9	Y280_G9	TRUE
EPI_ISL_13016	A/bird/Guangxi/82/2005	Y280_G9	Y280_G9	TRUE
EPI_ISL_13017	A/bird/Guangxi/83/2005	Y280_G9	Y280_G9	TRUE
EPI_ISL_13021	A/bird/Guangxi/H1/2006	Y280_G9	Y280_G9	TRUE
EPI_ISL_98372	A/black-billed_magpie/Guangxi/29/2005	Y280_G9	Y280_G9	TRUE
EPI_ISL_98371	A/black-billed_magpie/Guangxi/30/2005	Y280_G9	Y280_G9	TRUE
EPI_ISL_98370	A/black-billed_magpie/Guangxi/31/2005	Y280_G9	Y280_G9	TRUE
EPI_ISL_68588	A/chicken/Anhui/1/1998	Y280_G9	Y280_G9	TRUE
EPI_ISL_2153	A/chicken/Anhui/1/98	Y280_G9	Y280_G9	TRUE
EPI_ISL_67715	A/chicken/Anhui/2/2002	Y280_G9	Y280_G9	TRUE
EPI_ISL_84317	A/chicken/Anhui/2h/2002	Y280_G9	Y280_G9	TRUE
EPI_ISL_3446	A/chicken/Beijing/1/00	Y280_G9	Y280_G9	TRUE
EPI_ISL_2439	A/chicken/Beijing/1/95	Y280_G9	Y280_G9	TRUE
EPI_ISL_2441	A/chicken/Beijing/3/99	Y280_G9	Y280_G9	TRUE
EPI_ISL_68494	A/chicken/Beijing/ne/1999	Y280_G9	Y280_G9	TRUE
EPI_ISL_67717	A/chicken/Beijing/nl/2002	Y280_G9	Y280_G9	TRUE
EPI_ISL_24717	A/chicken/Fujian/2/2002	Y280_G9	Y280_G9	TRUE
EPI_ISL_8494	A/chicken/Fujian/25/00	Y280_G9	Y280_G9	TRUE
EPI_ISL_2156	A/chicken/Gangxi/2/00	Y280_G9	Y280_G9	TRUE
EPI_ISL_2154	A/chicken/Gansu/1/99	Y280_G9	Y280_G9	TRUE
EPI_ISL_24720	A/chicken/Guangdong/10/2001	Y280_G9	Y280_G9	TRUE
EPI_ISL_2234	A/chicken/Guangdong/11/97	Y280_G9	Y280_G9	TRUE
EPI_ISL_24721	A/chicken/Guangdong/16/1999	Y280_G9	Y280_G9	TRUE
EPI_ISL_74003	A/chicken/Guangdong/16/2003	Y280_G9	Y280_G9	TRUE
EPI_ISL_8498	A/chicken/Guangdong/5/97	Y280_G9	Y280_G9	TRUE
EPI_ISL_8499	A/chicken/Guangdong/56/01	Y280_G9	Y280_G9	TRUE
EPI_ISL_8500	A/chicken/Guangdong/6/97	Y280_G9	Y280_G9	TRUE
EPI_ISL_68684	A/chicken/Guangdong/97_	Y280_G9	Y280_G9	TRUE
EPI_ISL_68726	A/chicken/Guangdong/SS/94	Y280_G9	Y280_G9	TRUE
EPI_ISL_8501	A/chicken/Guangxi/10/99	Y280_G9	Y280_G9	TRUE
EPI_ISL_70608	A/chicken/Guangxi/101/2006	Y280_G9	Y280_G9	TRUE
EPI_ISL_70604	A/chicken/Guangxi/17/2007	Y280_G9	Y280_G9	TRUE
EPI_ISL_65219	A/chicken/Guangxi/1857/2004	Y280_G9	Y280_G9	TRUE
EPI_ISL_7366	A/chicken/Guangxi/187/2005	Y280_G9	Y280_G9	TRUE
EPI_ISL_7370	A/chicken/Guangxi/2389/2005	Y280_G9	Y280_G9	TRUE
EPI_ISL_65220	A/chicken/Guangxi/2441/2004	Y280_G9	Y280_G9	TRUE
EPI_ISL_13010	A/chicken/Guangxi/37/2005	Y280_G9	Y280_G9	TRUE
EPI_ISL_70606	A/chicken/Guangxi/39/2007	Y280_G9	Y280_G9	TRUE
EPI_ISL_7367	A/chicken/Guangxi/521/2005	Y280_G9	Y280_G9	TRUE
EPI_ISL_8502	A/chicken/Guangxi/9/99	Y280_G9	Y280_G9	TRUE
EPI_ISL_68562	A/chicken/Guangxi/KMI/99	Y280_G9	Y280_G9	TRUE
EPI_ISL_78799	A/chicken/Guangxi/KMIII/1999	Y280_G9	Y280_G9	TRUE
EPI_ISL_2157	A/chicken/Hebei/1/00	Y280_G9	Y280_G9	TRUE
EPI_ISL_84316	A/chicken/Hebei/1/1999	Y280_G9	Y280_G9	TRUE
EPI_ISL_2443	A/chicken/Hebei/1/96	Y280_G9	Y280_G9	TRUE
EPI_ISL_67722	A/chicken/Hebei/nj/2002	Y280_G9	Y280_G9	TRUE
EPI_ISL_24724	A/chicken/Hebei/sjz2/2001	Y280_G9	Y280_G9	TRUE
EPI_ISL_2236	A/chicken/Heilongjiang/10/97	Y280_G9	Y280_G9	TRUE
EPI_ISL_24918	A/chicken/Henan/01/2007	Y280_G9	Y280_G9	TRUE
EPI_ISL_67723	A/chicken/Henan/1/2002	Y280_G9	Y280_G9	TRUE
EPI_ISL_65629	A/chicken/Henan/1/2004	Y280_G9	Y280_G9	TRUE
EPI_ISL_64827	A/chicken/Henan/1/2005	Y280_G9	Y280_G9	TRUE
EPI_ISL_65630	A/chicken/Henan/2/2004	Y280_G9	Y280_G9	TRUE
EPI_ISL_2158	A/chicken/Henan/2/98	Y280_G9	Y280_G9	TRUE
EPI_ISL_93809	A/chicken/Henan/N12/2009	Y280_G9	Y280_G9	TRUE
EPI_ISL_93811	A/chicken/Henan/N3/2002	Y280_G9	Y280_G9	TRUE
EPI_ISL_68590	A/chicken/Henan/nd/1998	Y280_G9	Y280_G9	TRUE
EPI_ISL_68018	A/chicken/Henan/ni/2001	Y280_G9	Y280_G9	TRUE
EPI_ISL_1264	A/chicken/Hong_Kong/G23/97	Y280_G9	Y280_G9	TRUE
EPI_ISL_1263	A/chicken/Hong_Kong/G9/97	Y280_G9	Y280_G9	TRUE
EPI_ISL_14003	A/chicken/Hubei/C1/2007	Y280_G9	Y280_G9	TRUE
EPI_ISL_67726	A/chicken/Hunan/774/2002	Y280_G9	Y280_G9	TRUE
EPI_ISL_90381	A/chicken/Jiangsu/01/2003	Y280_G9	Y280_G9	TRUE
EPI_ISL_68599	A/chicken/Jiangsu/1/1998	Y280_G9	Y280_G9	TRUE
EPI_ISL_68502	A/chicken/Jiangsu/1/1999	Y280_G9	Y280_G9	TRUE
EPI_ISL_67729	A/chicken/Jiangsu/1/2002	Y280_G9	Y280_G9	TRUE
EPI_ISL_65631	A/chicken/Jiangsu/1/2004	Y280_G9	Y280_G9	TRUE
EPI_ISL_2151	A/chicken/Jiangsu/1/99	Y280_G9	Y280_G9	TRUE
EPI_ISL_68025	A/chicken/Jiangsu/2/2001	Y280_G9	Y280_G9	TRUE
EPI_ISL_2152	A/chicken/Jiangsu/2/98	Y280_G9	Y280_G9	TRUE
EPI_ISL_90380	A/chicken/Jiangsu/48/2001	Y280_G9	Y280_G9	TRUE
EPI_ISL_29822	A/chicken/Jiangsu/7/2002	Y280_G9	Y280_G9	TRUE
EPI_ISL_93810	A/chicken/Jiangsu/A11/2007	Y280_G9	Y280_G9	TRUE
EPI_ISL_3588	A/chicken/Jiangsu/JS-1/2002	Y280_G9	Y280_G9	TRUE
EPI_ISL_68026	A/chicken/Jiangsu/ng/2001	Y280_G9	Y280_G9	TRUE
EPI_ISL_24726	A/chicken/Jiangsu/nj13/2001	Y280_G9	Y280_G9	TRUE
EPI_ISL_67730	A/chicken/Jiangsu/wa/2002	Y280_G9	Y280_G9	TRUE
EPI_ISL_335	A/chicken/Kobe/aq26/2001	Y280_G9	Y280_G9	TRUE
EPI_ISL_3692	A/chicken/Mudanjiang/0823/2000	Y280_G9	Y280_G9	TRUE
EPI_ISL_74002	A/chicken/Nanjing/13/2003	Y280_G9	Y280_G9	TRUE
EPI_ISL_67738	A/chicken/Neimonggu/nk/2002	Y280_G9	Y280_G9	TRUE
EPI_ISL_2238	A/chicken/Ningxia/5/99	Y280_G9	Y280_G9	TRUE
EPI_ISL_333	A/chicken/Osaka/aq48/97	Y280_G9	Y280_G9	TRUE
EPI_ISL_337	A/chicken/Osaka/aq69/2001	Y280_G9	Y280_G9	TRUE
EPI_ISL_68378	A/chicken/Shandong/1/2000	Y280_G9	Y280_G9	TRUE
EPI_ISL_82191	A/chicken/Shandong/1/2008	Y280_G9	Y280_G9	TRUE
EPI_ISL_24712	A/chicken/Shandong/2/2003	Y280_G9	Y280_G9	TRUE
EPI_ISL_84313	A/chicken/Shandong/2h/2001	Y280_G9	Y280_G9	TRUE
EPI_ISL_2240	A/chicken/Shandong/6/96	Y280_G9	Y280_G9	TRUE
EPI_ISL_8513	A/chicken/Shandong/7/96	Y280_G9	Y280_G9	TRUE
EPI_ISL_68578	A/chicken/Shandong/98	Y280_G9	Y280_G9	TRUE
EPI_ISL_77228	A/chicken/Shandong/JN4/2005	Y280_G9	Y280_G9	TRUE
EPI_ISL_77229	A/chicken/Shandong/JN5/2005	Y280_G9	Y280_G9	TRUE
EPI_ISL_24919	A/chicken/Shandong/lx06/2007	Y280_G9	Y280_G9	TRUE
EPI_ISL_82537	A/chicken/Shandong/SD0014/2008	Y280_G9	Y280_G9	TRUE
EPI_ISL_8514	A/chicken/Shanghai/10/01	Y280_G9	Y280_G9	TRUE
EPI_ISL_25002	A/chicken/Shanghai/12/2001	Y280_G9	Y280_G9	TRUE
EPI_ISL_25003	A/chicken/Shanghai/14/2001	Y280_G9	Y280_G9	TRUE
EPI_ISL_25004	A/chicken/Shanghai/16/2001	Y280_G9	Y280_G9	TRUE
EPI_ISL_24997	A/chicken/Shanghai/2/1999	Y280_G9	Y280_G9	TRUE
EPI_ISL_25000	A/chicken/Shanghai/2/2001	Y280_G9	Y280_G9	TRUE
EPI_ISL_2163	A/chicken/Shanghai/3/00	Y280_G9	Y280_G9	TRUE
EPI_ISL_3092	A/chicken/Shanghai/3/01	Y280_G9	Y280_G9	TRUE
EPI_ISL_24998	A/chicken/Shanghai/3/2000	Y280_G9	Y280_G9	TRUE
EPI_ISL_3093	A/chicken/Shanghai/4/01	Y280_G9	Y280_G9	TRUE
EPI_ISL_2164	A/chicken/Shanghai/4-1/01	Y280_G9	Y280_G9	TRUE
EPI_ISL_2165	A/chicken/Shanghai/4-2/01	Y280_G9	Y280_G9	TRUE
EPI_ISL_25001	A/chicken/Shanghai/7/2001	Y280_G9	Y280_G9	TRUE
EPI_ISL_68579	A/chicken/Shanghai/F/98	Y280_G9	Y280_G9	TRUE
EPI_ISL_7475	A/chicken/Shantou/1322/2000	Y280_G9	Y280_G9	TRUE
EPI_ISL_7477	A/chicken/Shantou/1690/2000	Y280_G9	Y280_G9	TRUE
EPI_ISL_7474	A/chicken/Shantou/859/2000	Y280_G9	Y280_G9	TRUE
EPI_ISL_7472	A/chicken/Shantou/94/2000	Y280_G9	Y280_G9	TRUE
EPI_ISL_2242	A/chicken/Shenzhen/9/97	Y280_G9	Y280_G9	TRUE
EPI_ISL_68507	A/chicken/Shenzhen/u/1999	Y280_G9	Y280_G9	TRUE
EPI_ISL_8515	A/chicken/Shijiazhuang/2/98	Y280_G9	Y280_G9	TRUE
EPI_ISL_2241	A/chicken/Shijiazhuang/2/99	Y280_G9	Y280_G9	TRUE
EPI_ISL_2239	A/chicken/Sichuan/5/97	Y280_G9	Y280_G9	TRUE
EPI_ISL_2166	A/chicken/Tianjing/1/96	Y280_G9	Y280_G9	TRUE
EPI_ISL_2167	A/chicken/Tianjing/2/96	Y280_G9	Y280_G9	TRUE
EPI_ISL_339	A/chicken/Yokohama/aq134/2002	Y280_G9	Y280_G9	TRUE
EPI_ISL_338	A/chicken/Yokohama/aq45/2002	Y280_G9	Y280_G9	TRUE
EPI_ISL_2168	A/chicken/Yunnan/1/99	Y280_G9	Y280_G9	TRUE
EPI_ISL_7385	A/chicken/Yunnan/1147/2003	Y280_G9	Y280_G9	TRUE
EPI_ISL_2169	A/chicken/Yunnan/2/00	Y280_G9	Y280_G9	TRUE
EPI_ISL_7388	A/chicken/Yunnan/3511/2004	Y280_G9	Y280_G9	TRUE
EPI_ISL_7389	A/chicken/Yunnan/3727/2004	Y280_G9	Y280_G9	TRUE
EPI_ISL_7382	A/chicken/Yunnan/401/2002	Y280_G9	Y280_G9	TRUE
EPI_ISL_7383	A/chicken/Yunnan/522/2002	Y280_G9	Y280_G9	TRUE
EPI_ISL_7386	A/chicken/Yunnan/5653/2003	Y280_G9	Y280_G9	TRUE
EPI_ISL_7384	A/chicken/Yunnan/955/2002	Y280_G9	Y280_G9	TRUE
EPI_ISL_68028	A/chicken/Yunnan/nh/2001	Y280_G9	Y280_G9	TRUE
EPI_ISL_9797	A/chicken/Yunnan/Xie-1/1999	Y280_G9	Y280_G9	TRUE
EPI_ISL_13011	A/duck/Guangxi/51/2005	Y280_G9	Y280_G9	TRUE
EPI_ISL_29377	A/duck/Hong_Kong/W213/1997	Y280_G9	Y280_G9	TRUE
EPI_ISL_34045	A/duck/Jiangsu/3/2005	Y280_G9	Y280_G9	TRUE
EPI_ISL_34046	A/duck/Jiangsu/9/2004	Y280_G9	Y280_G9	TRUE
EPI_ISL_67749	A/duck/Jiangsu/nf/2002	Y280_G9	Y280_G9	TRUE
EPI_ISL_10367	A/duck/Nanjing/01/1999	Y280_G9	Y280_G9	TRUE
EPI_ISL_2243	A/duck/Nanjing/1/97	Y280_G9	Y280_G9	TRUE
EPI_ISL_8511	A/duck/Nanjing/2/97	Y280_G9	Y280_G9	TRUE
EPI_ISL_2302	A/duck/Shantou/1605/01	Y280_G9	Y280_G9	TRUE
EPI_ISL_10366	A/duck/Xuzhou/05/2001	Y280_G9	Y280_G9	TRUE
EPI_ISL_10365	A/duck/Xuzhou/07/2003	Y280_G9	Y280_G9	TRUE
EPI_ISL_10364	A/duck/Zhejiang/03/2001	Y280_G9	Y280_G9	TRUE
EPI_ISL_97019	A/environment/Hong_Kong/1226/1999	Y280_G9	Y280_G9	TRUE
EPI_ISL_1265	A/Pigeon/Hong_Kong/Y233/97	Y280_G9	Y280_G9	TRUE
EPI_ISL_13018	A/quail/Guangxi/B1/2006	Y280_G9	Y280_G9	TRUE
EPI_ISL_3199	A/quail/Nanchang/2-0460/2000	Y280_G9	Y280_G9	TRUE
EPI_ISL_70609	A/sparrow/Guangxi/09/2005	Y280_G9	Y280_G9	TRUE
EPI_ISL_70614	A/sparrow/Guangxi/121/2007	Y280_G9	Y280_G9	TRUE
EPI_ISL_70613	A/sparrow/Guangxi/93/2006	Y280_G9	Y280_G9	TRUE
EPI_ISL_3465	A/Sw/ShanDong/1/2003	Y280_G9	Y280_G9	TRUE
EPI_ISL_12580	A/swine/Guangxi/58/2005	Y280_G9	Y280_G9	TRUE
EPI_ISL_13020	A/swine/Guangxi/FS2/2005	Y280_G9	Y280_G9	TRUE
EPI_ISL_13023	A/swine/Guangxi/S11/2005	Y280_G9	Y280_G9	TRUE
EPI_ISL_13022	A/swine/Guangxi/S15/2005	Y280_G9	Y280_G9	TRUE
EPI_ISL_141	A/swine/Hong_Kong/10/98	Y280_G9	Y280_G9	TRUE
EPI_ISL_142	A/swine/Hong_Kong/9/98	Y280_G9	Y280_G9	TRUE
EPI_ISL_84311	A/swine/Shandong/3/2003	Y280_G9	Y280_G9	TRUE
EPI_ISL_84312	A/swine/Shandong/8/2003	Y280_G9	Y280_G9	TRUE
EPI_ISL_67426	A/swine/Shandong/fHZ/2003	Y280_G9	Y280_G9	TRUE
EPI_ISL_67427	A/swine/Shandong/fJN/2003	Y280_G9	Y280_G9	TRUE
EPI_ISL_67428	A/swine/Shandong/fLS/2003	Y280_G9	Y280_G9	TRUE
EPI_ISL_67429	A/swine/Shandong/fNY/2003	Y280_G9	Y280_G9	TRUE
EPI_ISL_67430	A/swine/Shandong/fZC/2003	Y280_G9	Y280_G9	TRUE
EPI_ISL_67422	A/swine/Shandong/na/2003	Y280_G9	Y280_G9	TRUE
EPI_ISL_67423	A/swine/Shandong/nb/2003	Y280_G9	Y280_G9	TRUE
EPI_ISL_64951	A/swine/Shandong/nc/2005	Y280_G9	Y280_G9	TRUE
EPI_ISL_67424	A/swine/Shandong/w4/2003	Y280_G9	Y280_G9	TRUE
EPI_ISL_62989	A/chicken/Anhui/G24/2008	Y280_Sha_ZB07	Y280_Sha_ZB07	TRUE
EPI_ISL_62990	A/chicken/Anhui/G6/2008	Y280_Sha_ZB07	Y280_Sha_ZB07	TRUE
EPI_ISL_62991	A/chicken/Anhui/J13/2008	Y280_Sha_ZB07	Y280_Sha_ZB07	TRUE
EPI_ISL_62993	A/chicken/Anhui/J2/2008	Y280_Sha_ZB07	Y280_Sha_ZB07	TRUE
EPI_ISL_62995	A/chicken/Anhui/J22/2008	Y280_Sha_ZB07	Y280_Sha_ZB07	TRUE
EPI_ISL_62997	A/chicken/Anhui/J7/2008	Y280_Sha_ZB07	Y280_Sha_ZB07	TRUE
EPI_ISL_71046	A/chicken/Hebei/4/2008	Y280_Sha_ZB07	Y280_Sha_ZB07	TRUE
EPI_ISL_76659	A/chicken/Hebei/7/2008	Y280_Sha_ZB07	Y280_Sha_ZB07	TRUE
EPI_ISL_76661	A/chicken/Hebei/A/2007	Y280_Sha_ZB07	Y280_Sha_ZB07	TRUE
EPI_ISL_76662	A/chicken/Hebei/Y2/2009	Y280_Sha_ZB07	Y280_Sha_ZB07	TRUE
EPI_ISL_76660	A/chicken/Henan/1.2/2008	Y280_Sha_ZB07	Y280_Sha_ZB07	TRUE
EPI_ISL_24746	A/chicken/Jilin/dh1024/2007	Y280_Sha_ZB07	Y280_Sha_ZB07	TRUE
EPI_ISL_24728	A/chicken/Liaoning/hld1024/2007	Y280_Sha_ZB07	Y280_Sha_ZB07	TRUE
EPI_ISL_24729	A/chicken/Shandong/jn408/2007	Y280_Sha_ZB07	Y280_Sha_ZB07	TRUE
EPI_ISL_24739	A/chicken/Shandong/lx1029/2007	Y280_Sha_ZB07	Y280_Sha_ZB07	TRUE
EPI_ISL_24714	A/chicken/Shandong/lx316/2007	Y280_Sha_ZB07	Y280_Sha_ZB07	TRUE
EPI_ISL_24734	A/chicken/Shandong/lx327/2007	Y280_Sha_ZB07	Y280_Sha_ZB07	TRUE
EPI_ISL_24735	A/chicken/Shandong/lx331/2007	Y280_Sha_ZB07	Y280_Sha_ZB07	TRUE
EPI_ISL_24736	A/chicken/Shandong/lx414/2007	Y280_Sha_ZB07	Y280_Sha_ZB07	TRUE
EPI_ISL_24713	A/chicken/Shandong/ly421/2007	Y280_Sha_ZB07	Y280_Sha_ZB07	TRUE
EPI_ISL_84319	A/chicken/Shandong/ZB/2007	Y280_Sha_ZB07	Y280_Sha_ZB07	TRUE
EPI_ISL_75419	A/swine/Hebei/012/2008	Y280_Sha_ZB07	Y280_Sha_ZB07	TRUE
EPI_ISL_13019	A/bird/Guangxi/A1/2006	Y280B	Y280B	TRUE
EPI_ISL_93624	A/canine/Guangxi/1/2011/H9N2	Y280B	Y280B	TRUE
EPI_ISL_98117	A/chicken/Anhui/A12/2011	Y280B	Y280B	TRUE
EPI_ISL_98114	A/chicken/Anhui/A17/2011	Y280B	Y280B	TRUE
EPI_ISL_97594	A/chicken/Anhui/A19/2010	Y280B	Y280B	TRUE
EPI_ISL_97593	A/chicken/Anhui/A20/2010	Y280B	Y280B	TRUE
EPI_ISL_97592	A/chicken/Anhui/A25/2010	Y280B	Y280B	TRUE
EPI_ISL_98110	A/chicken/Anhui/A25/2011	Y280B	Y280B	TRUE
EPI_ISL_98107	A/chicken/Anhui/A28/2011	Y280B	Y280B	TRUE
EPI_ISL_98105	A/chicken/Anhui/A3/2011	Y280B	Y280B	TRUE
EPI_ISL_98101	A/chicken/Anhui/A9/2011	Y280B	Y280B	TRUE
EPI_ISL_29161	A/chicken/Anhui/AH16/2008	Y280B	Y280B	TRUE
EPI_ISL_29162	A/chicken/Anhui/AH23/2008	Y280B	Y280B	TRUE
EPI_ISL_29163	A/chicken/Anhui/AI16/2008	Y280B	Y280B	TRUE
EPI_ISL_29164	A/chicken/Anhui/AK13/2008	Y280B	Y280B	TRUE
EPI_ISL_29165	A/chicken/Anhui/AK25/2008	Y280B	Y280B	TRUE
EPI_ISL_97590	A/chicken/Anhui/B17-2/2010	Y280B	Y280B	TRUE
EPI_ISL_97651	A/chicken/Anhui/B18/2010	Y280B	Y280B	TRUE
EPI_ISL_97754	A/chicken/Anhui/B19/2011	Y280B	Y280B	TRUE
EPI_ISL_97656	A/chicken/Anhui/B2/2010	Y280B	Y280B	TRUE
EPI_ISL_97650	A/chicken/Anhui/B20/2010	Y280B	Y280B	TRUE
EPI_ISL_97753	A/chicken/Anhui/B20/2011	Y280B	Y280B	TRUE
EPI_ISL_97751	A/chicken/Anhui/B24/2011	Y280B	Y280B	TRUE
EPI_ISL_97756	A/chicken/Anhui/B6/2011	Y280B	Y280B	TRUE
EPI_ISL_97654	A/chicken/Anhui/B7/2010	Y280B	Y280B	TRUE
EPI_ISL_97755	A/chicken/Anhui/B7/2011	Y280B	Y280B	TRUE
EPI_ISL_98100	A/chicken/Anhui/D14/2011	Y280B	Y280B	TRUE
EPI_ISL_97587	A/chicken/Anhui/D19/2010	Y280B	Y280B	TRUE
EPI_ISL_97586	A/chicken/Anhui/D21/2010	Y280B	Y280B	TRUE
EPI_ISL_97747	A/chicken/Anhui/D21/2011	Y280B	Y280B	TRUE
EPI_ISL_97584	A/chicken/Anhui/D25/2010	Y280B	Y280B	TRUE
EPI_ISL_97750	A/chicken/Anhui/D3/2011	Y280B	Y280B	TRUE
EPI_ISL_98099	A/chicken/Anhui/D30/2011	Y280B	Y280B	TRUE
EPI_ISL_98098	A/chicken/Anhui/E13/2011	Y280B	Y280B	TRUE
EPI_ISL_97745	A/chicken/Anhui/E15/2011	Y280B	Y280B	TRUE
EPI_ISL_98095	A/chicken/Anhui/E19/2011	Y280B	Y280B	TRUE
EPI_ISL_98093	A/chicken/Anhui/E22/2011	Y280B	Y280B	TRUE
EPI_ISL_97743	A/chicken/Anhui/E23-2/2011	Y280B	Y280B	TRUE
EPI_ISL_98089	A/chicken/Anhui/E26/2011	Y280B	Y280B	TRUE
EPI_ISL_98087	A/chicken/Anhui/E29/2011	Y280B	Y280B	TRUE
EPI_ISL_98081	A/chicken/Anhui/E9/2011	Y280B	Y280B	TRUE
EPI_ISL_97738	A/chicken/Anhui/F31/2011	Y280B	Y280B	TRUE
EPI_ISL_97644	A/chicken/Anhui/G12/2010	Y280B	Y280B	TRUE
EPI_ISL_97643	A/chicken/Anhui/G14/2010	Y280B	Y280B	TRUE
EPI_ISL_97642	A/chicken/Anhui/G15/2010	Y280B	Y280B	TRUE
EPI_ISL_97641	A/chicken/Anhui/G16/2010	Y280B	Y280B	TRUE
EPI_ISL_97639	A/chicken/Anhui/G18/2010	Y280B	Y280B	TRUE
EPI_ISL_97734	A/chicken/Anhui/G18/2011	Y280B	Y280B	TRUE
EPI_ISL_62988	A/chicken/Anhui/G20/2008	Y280B	Y280B	TRUE
EPI_ISL_97733	A/chicken/Anhui/G25/2011	Y280B	Y280B	TRUE
EPI_ISL_97737	A/chicken/Anhui/G6/2011	Y280B	Y280B	TRUE
EPI_ISL_89714	A/chicken/Anhui/GQY/2011	Y280B	Y280B	TRUE
EPI_ISL_98079	A/chicken/Anhui/I12/2011	Y280B	Y280B	TRUE
EPI_ISL_98078	A/chicken/Anhui/I13/2011	Y280B	Y280B	TRUE
EPI_ISL_98069	A/chicken/Anhui/I24/2011	Y280B	Y280B	TRUE
EPI_ISL_98064	A/chicken/Anhui/I4/2011	Y280B	Y280B	TRUE
EPI_ISL_98062	A/chicken/Anhui/I8/2011	Y280B	Y280B	TRUE
EPI_ISL_97726	A/chicken/Anhui/J19/2011	Y280B	Y280B	TRUE
EPI_ISL_98056	A/chicken/Anhui/K13/2011	Y280B	Y280B	TRUE
EPI_ISL_97720	A/chicken/Anhui/K17/2011	Y280B	Y280B	TRUE
EPI_ISL_97725	A/chicken/Anhui/K3-2/2011	Y280B	Y280B	TRUE
EPI_ISL_97711	A/chicken/Anhui/M10/2011	Y280B	Y280B	TRUE
EPI_ISL_97710	A/chicken/Anhui/M13/2011	Y280B	Y280B	TRUE
EPI_ISL_97709	A/chicken/Anhui/M18/2011	Y280B	Y280B	TRUE
EPI_ISL_97717	A/chicken/Anhui/M2/2011	Y280B	Y280B	TRUE
EPI_ISL_97708	A/chicken/Anhui/M25/2011	Y280B	Y280B	TRUE
EPI_ISL_97715	A/chicken/Anhui/M5/2011	Y280B	Y280B	TRUE
EPI_ISL_97713	A/chicken/Anhui/M8/2011	Y280B	Y280B	TRUE
EPI_ISL_89710	A/chicken/Anhui/WANG/2010	Y280B	Y280B	TRUE
EPI_ISL_89736	A/chicken/Anhui/WBQ/2011	Y280B	Y280B	TRUE
EPI_ISL_89750	A/chicken/Anhui/XMS/2011	Y280B	Y280B	TRUE
EPI_ISL_89715	A/chicken/Anhui/ZTL/2011	Y280B	Y280B	TRUE
EPI_ISL_99613	A/chicken/Anhui/ZYX05/2011	Y280B	Y280B	TRUE
EPI_ISL_84536	A/chicken/Baoshan/111/2009	Y280B	Y280B	TRUE
EPI_ISL_84544	A/chicken/Baoshan/711/2008	Y280B	Y280B	TRUE
EPI_ISL_84333	A/chicken/Beijing/1/2006	Y280B	Y280B	TRUE
EPI_ISL_2170	A/chicken/Beijing/1/97	Y280B	Y280B	TRUE
EPI_ISL_74000	A/chicken/Beijing/19/2003	Y280B	Y280B	TRUE
EPI_ISL_2440	A/chicken/Beijing/2/97	Y280B	Y280B	TRUE
EPI_ISL_84332	A/chicken/Beijing/7/2005	Y280B	Y280B	TRUE
EPI_ISL_2232	A/chicken/Beijing/8/98	Y280B	Y280B	TRUE
EPI_ISL_4042	A/chicken/Beijing/9/98	Y280B	Y280B	TRUE
EPI_ISL_13996	A/chicken/Beijing/L1/2005	Y280B	Y280B	TRUE
EPI_ISL_69854	A/chicken/China	Y280B	Y280B	TRUE
EPI_ISL_2851	A/chicken/China/AG518/2001	Y280B	Y280B	TRUE
EPI_ISL_90154	A/chicken/China/AH-10-01/2010	Y280B	Y280B	TRUE
EPI_ISL_10168	A/chicken/China/Guangxi1/2000	Y280B	Y280B	TRUE
EPI_ISL_10169	A/chicken/China/Guangxi14/2000	Y280B	Y280B	TRUE
EPI_ISL_10170	A/chicken/China/Guangxi17/2000	Y280B	Y280B	TRUE
EPI_ISL_97669	A/chicken/Chongqing/A56/2011	Y280B	Y280B	TRUE
EPI_ISL_97660	A/chicken/Chongqing/D17/2011	Y280B	Y280B	TRUE
EPI_ISL_98034	A/chicken/Chongqing/G10/2011	Y280B	Y280B	TRUE
EPI_ISL_98032	A/chicken/Chongqing/G12/2011	Y280B	Y280B	TRUE
EPI_ISL_98031	A/chicken/Chongqing/G14/2011	Y280B	Y280B	TRUE
EPI_ISL_98029	A/chicken/Chongqing/G21/2011	Y280B	Y280B	TRUE
EPI_ISL_98028	A/chicken/Chongqing/G23/2011	Y280B	Y280B	TRUE
EPI_ISL_98027	A/chicken/Chongqing/G25/2011	Y280B	Y280B	TRUE
EPI_ISL_98019	A/chicken/Chongqing/J23/2011	Y280B	Y280B	TRUE
EPI_ISL_97662	A/chicken/Chongqing/K10/2011	Y280B	Y280B	TRUE
EPI_ISL_97671	A/chicken/Chongqing/K16/2011	Y280B	Y280B	TRUE
EPI_ISL_97663	A/chicken/Chongqing/K23/2011	Y280B	Y280B	TRUE
EPI_ISL_97670	A/chicken/Chongqing/K3/2011	Y280B	Y280B	TRUE
EPI_ISL_97668	A/chicken/Chongqing/K4/2011	Y280B	Y280B	TRUE
EPI_ISL_97672	A/chicken/Chongqing/K7/2011	Y280B	Y280B	TRUE
EPI_ISL_84540	A/chicken/Dehong/411/2009	Y280B	Y280B	TRUE
EPI_ISL_7358	A/chicken/Fujian/10308/2005	Y280B	Y280B	TRUE
EPI_ISL_7359	A/chicken/Fujian/10954/2005	Y280B	Y280B	TRUE
EPI_ISL_73998	A/chicken/Fujian/11/2007	Y280B	Y280B	TRUE
EPI_ISL_7360	A/chicken/Fujian/11302/2005	Y280B	Y280B	TRUE
EPI_ISL_7361	A/chicken/Fujian/11488/2005	Y280B	Y280B	TRUE
EPI_ISL_7362	A/chicken/Fujian/12252/2005	Y280B	Y280B	TRUE
EPI_ISL_7344	A/chicken/Fujian/3080/2005	Y280B	Y280B	TRUE
EPI_ISL_7345	A/chicken/Fujian/4332/2005	Y280B	Y280B	TRUE
EPI_ISL_7346	A/chicken/Fujian/4820/2005	Y280B	Y280B	TRUE
EPI_ISL_7347	A/chicken/Fujian/5214/2005	Y280B	Y280B	TRUE
EPI_ISL_7348	A/chicken/Fujian/5683/2005	Y280B	Y280B	TRUE
EPI_ISL_7349	A/chicken/Fujian/6188/2005	Y280B	Y280B	TRUE
EPI_ISL_7350	A/chicken/Fujian/6960/2005	Y280B	Y280B	TRUE
EPI_ISL_7351	A/chicken/Fujian/7386/2005	Y280B	Y280B	TRUE
EPI_ISL_7352	A/chicken/Fujian/7884/2005	Y280B	Y280B	TRUE
EPI_ISL_7355	A/chicken/Fujian/9104/2005	Y280B	Y280B	TRUE
EPI_ISL_7356	A/chicken/Fujian/9290/2005	Y280B	Y280B	TRUE
EPI_ISL_7357	A/chicken/Fujian/9752/2005	Y280B	Y280B	TRUE
EPI_ISL_29156	A/chicken/Fujian/FB21/2007	Y280B	Y280B	TRUE
EPI_ISL_29155	A/chicken/Fujian/FB22/2007	Y280B	Y280B	TRUE
EPI_ISL_29157	A/chicken/Fujian/FB3/2007	Y280B	Y280B	TRUE
EPI_ISL_29154	A/chicken/Fujian/FG13/2007	Y280B	Y280B	TRUE
EPI_ISL_29153	A/chicken/Fujian/FG14/2007	Y280B	Y280B	TRUE
EPI_ISL_29151	A/chicken/Fujian/FH14/2007	Y280B	Y280B	TRUE
EPI_ISL_29152	A/chicken/Fujian/FH7/2007	Y280B	Y280B	TRUE
EPI_ISL_89652	A/chicken/Fujian/G9/2009	Y280B	Y280B	TRUE
EPI_ISL_99614	A/chicken/Fujian/HJF04/2011	Y280B	Y280B	TRUE
EPI_ISL_89733	A/chicken/Fujian/SL4/2011	Y280B	Y280B	TRUE
EPI_ISL_2155	A/chicken/Gangxi/1/00	Y280B	Y280B	TRUE
EPI_ISL_11187	A/chicken/Gansu/2/99	Y280B	Y280B	TRUE
EPI_ISL_24917	A/chicken/Guangdong/02/2007	Y280B	Y280B	TRUE
EPI_ISL_24718	A/chicken/Guangdong/1/2002	Y280B	Y280B	TRUE
EPI_ISL_2233	A/chicken/Guangdong/10/00	Y280B	Y280B	TRUE
EPI_ISL_8495	A/chicken/Guangdong/21/02	Y280B	Y280B	TRUE
EPI_ISL_24722	A/chicken/Guangdong/22/2001	Y280B	Y280B	TRUE
EPI_ISL_8496	A/chicken/Guangdong/4/00	Y280B	Y280B	TRUE
EPI_ISL_8497	A/chicken/Guangdong/47/01	Y280B	Y280B	TRUE
EPI_ISL_69427	A/chicken/Guangdong/A10/2007	Y280B	Y280B	TRUE
EPI_ISL_69425	A/chicken/Guangdong/A3/2003	Y280B	Y280B	TRUE
EPI_ISL_69429	A/chicken/Guangdong/A4/2003	Y280B	Y280B	TRUE
EPI_ISL_69426	A/chicken/Guangdong/A5/2003	Y280B	Y280B	TRUE
EPI_ISL_69421	A/chicken/Guangdong/A6/2003	Y280B	Y280B	TRUE
EPI_ISL_69415	A/chicken/Guangdong/A7/2002	Y280B	Y280B	TRUE
EPI_ISL_98259	A/chicken/Guangdong/B106/2009	Y280B	Y280B	TRUE
EPI_ISL_98326	A/chicken/Guangdong/B15/2009	Y280B	Y280B	TRUE
EPI_ISL_98302	A/chicken/Guangdong/B16/2009	Y280B	Y280B	TRUE
EPI_ISL_69428	A/chicken/Guangdong/B2/2006	Y280B	Y280B	TRUE
EPI_ISL_69416	A/chicken/Guangdong/B4/2006	Y280B	Y280B	TRUE
EPI_ISL_69418	A/chicken/Guangdong/B5/2002	Y280B	Y280B	TRUE
EPI_ISL_69422	A/chicken/Guangdong/B6/2005	Y280B	Y280B	TRUE
EPI_ISL_69419	A/chicken/Guangdong/B7/2003	Y280B	Y280B	TRUE
EPI_ISL_98224	A/chicken/Guangdong/B7/2009	Y280B	Y280B	TRUE
EPI_ISL_98244	A/chicken/Guangdong/B87/2009	Y280B	Y280B	TRUE
EPI_ISL_69417	A/chicken/Guangdong/B9/2002	Y280B	Y280B	TRUE
EPI_ISL_97515	A/chicken/Guangdong/D2/2010	Y280B	Y280B	TRUE
EPI_ISL_97514	A/chicken/Guangdong/D4/2010	Y280B	Y280B	TRUE
EPI_ISL_97513	A/chicken/Guangdong/D7/2010	Y280B	Y280B	TRUE
EPI_ISL_97512	A/chicken/Guangdong/D8/2010	Y280B	Y280B	TRUE
EPI_ISL_97511	A/chicken/Guangdong/D9/2010	Y280B	Y280B	TRUE
EPI_ISL_99619	A/chicken/Guangdong/DJN03/2011	Y280B	Y280B	TRUE
EPI_ISL_69409	A/chicken/Guangdong/E23/2008	Y280B	Y280B	TRUE
EPI_ISL_69410	A/chicken/Guangdong/E24/2008	Y280B	Y280B	TRUE
EPI_ISL_69411	A/chicken/Guangdong/E25/2008	Y280B	Y280B	TRUE
EPI_ISL_69430	A/chicken/Guangdong/G7/2009	Y280B	Y280B	TRUE
EPI_ISL_23098	A/chicken/Guangdong/GZ02/2008	Y280B	Y280B	TRUE
EPI_ISL_97510	A/chicken/Guangdong/H11/2010	Y280B	Y280B	TRUE
EPI_ISL_97509	A/chicken/Guangdong/H12/2010	Y280B	Y280B	TRUE
EPI_ISL_97508	A/chicken/Guangdong/H28/2010	Y280B	Y280B	TRUE
EPI_ISL_97507	A/chicken/Guangdong/H29/2010	Y280B	Y280B	TRUE
EPI_ISL_69412	A/chicken/Guangdong/HE10/2009	Y280B	Y280B	TRUE
EPI_ISL_69424	A/chicken/Guangdong/HE12/2008	Y280B	Y280B	TRUE
EPI_ISL_69423	A/chicken/Guangdong/HE20/2008	Y280B	Y280B	TRUE
EPI_ISL_69413	A/chicken/Guangdong/HE21/2008	Y280B	Y280B	TRUE
EPI_ISL_69414	A/chicken/Guangdong/HE22/2008	Y280B	Y280B	TRUE
EPI_ISL_98217	A/chicken/Guangdong/J22/2009	Y280B	Y280B	TRUE
EPI_ISL_98315	A/chicken/Guangdong/J23/2009	Y280B	Y280B	TRUE
EPI_ISL_98311	A/chicken/Guangdong/J3/2009	Y280B	Y280B	TRUE
EPI_ISL_98314	A/chicken/Guangdong/J5/2009	Y280B	Y280B	TRUE
EPI_ISL_98318	A/chicken/Guangdong/K2/2009	Y280B	Y280B	TRUE
EPI_ISL_98308	A/chicken/Guangdong/K22/2009	Y280B	Y280B	TRUE
EPI_ISL_98312	A/chicken/Guangdong/K23/2009	Y280B	Y280B	TRUE
EPI_ISL_98321	A/chicken/Guangdong/K25/2009	Y280B	Y280B	TRUE
EPI_ISL_98320	A/chicken/Guangdong/K3/2009	Y280B	Y280B	TRUE
EPI_ISL_98301	A/chicken/Guangdong/K8/2009	Y280B	Y280B	TRUE
EPI_ISL_83298	A/chicken/Guangdong/L14/2009	Y280B	Y280B	TRUE
EPI_ISL_98310	A/chicken/Guangdong/L4/2009	Y280B	Y280B	TRUE
EPI_ISL_98237	A/chicken/Guangdong/P11/2009	Y280B	Y280B	TRUE
EPI_ISL_98219	A/chicken/Guangdong/P2/2009	Y280B	Y280B	TRUE
EPI_ISL_98223	A/chicken/Guangdong/P20/2009	Y280B	Y280B	TRUE
EPI_ISL_98327	A/chicken/Guangdong/P26/2009	Y280B	Y280B	TRUE
EPI_ISL_98238	A/chicken/Guangdong/P27/2009	Y280B	Y280B	TRUE
EPI_ISL_89648	A/chicken/Guangdong/Q6/2010	Y280B	Y280B	TRUE
EPI_ISL_98298	A/chicken/Guangdong/R13/2009	Y280B	Y280B	TRUE
EPI_ISL_98234	A/chicken/Guangdong/R17/2009	Y280B	Y280B	TRUE
EPI_ISL_98300	A/chicken/Guangdong/R21/2009	Y280B	Y280B	TRUE
EPI_ISL_98239	A/chicken/Guangdong/R23/2009	Y280B	Y280B	TRUE
EPI_ISL_98240	A/chicken/Guangdong/R24/2009	Y280B	Y280B	TRUE
EPI_ISL_98235	A/chicken/Guangdong/V11/2009	Y280B	Y280B	TRUE
EPI_ISL_98216	A/chicken/Guangdong/V12/2009	Y280B	Y280B	TRUE
EPI_ISL_98229	A/chicken/Guangdong/V13/2009	Y280B	Y280B	TRUE
EPI_ISL_98242	A/chicken/Guangdong/V23/2009	Y280B	Y280B	TRUE
EPI_ISL_83299	A/chicken/Guangdong/Y1/2009	Y280B	Y280B	TRUE
EPI_ISL_98236	A/chicken/Guangdong/Y12/2009	Y280B	Y280B	TRUE
EPI_ISL_98299	A/chicken/Guangdong/Y18/2009	Y280B	Y280B	TRUE
EPI_ISL_98305	A/chicken/Guangdong/Y4/2009	Y280B	Y280B	TRUE
EPI_ISL_98304	A/chicken/Guangdong/Y7/2009	Y280B	Y280B	TRUE
EPI_ISL_98306	A/chicken/Guangdong/Y8/2009	Y280B	Y280B	TRUE
EPI_ISL_83297	A/chicken/Guangdongg/G9/2009	Y280B	Y280B	TRUE
EPI_ISL_7368	A/chicken/Guangxi/1032/2005	Y280B	Y280B	TRUE
EPI_ISL_7369	A/chicken/Guangxi/1428/2005	Y280B	Y280B	TRUE
EPI_ISL_70605	A/chicken/Guangxi/21/2006	Y280B	Y280B	TRUE
EPI_ISL_13005	A/chicken/Guangxi/4/1999	Y280B	Y280B	TRUE
EPI_ISL_70607	A/chicken/Guangxi/44/2006	Y280B	Y280B	TRUE
EPI_ISL_7371	A/chicken/Guangxi/4745/2005	Y280B	Y280B	TRUE
EPI_ISL_13013	A/chicken/Guangxi/55/2005	Y280B	Y280B	TRUE
EPI_ISL_13012	A/chicken/Guangxi/6/2000	Y280B	Y280B	TRUE
EPI_ISL_69407	A/chicken/Guangxi/G8/2009	Y280B	Y280B	TRUE
EPI_ISL_99615	A/chicken/Guangxi/LRW04/2011	Y280B	Y280B	TRUE
EPI_ISL_89742	A/chicken/Guangxi/MFX/2011	Y280B	Y280B	TRUE
EPI_ISL_77226	A/chicken/Guangzhou/GZ/2005	Y280B	Y280B	TRUE
EPI_ISL_97582	A/chicken/Guizhou/A4/2010	Y280B	Y280B	TRUE
EPI_ISL_97579	A/chicken/Guizhou/D15/2010	Y280B	Y280B	TRUE
EPI_ISL_83288	A/chicken/Guizhou/D26/2009	Y280B	Y280B	TRUE
EPI_ISL_97703	A/chicken/Guizhou/D26/2011	Y280B	Y280B	TRUE
EPI_ISL_97573	A/chicken/Guizhou/E15/2010	Y280B	Y280B	TRUE
EPI_ISL_97572	A/chicken/Guizhou/E23/2010	Y280B	Y280B	TRUE
EPI_ISL_97571	A/chicken/Guizhou/E25/2010	Y280B	Y280B	TRUE
EPI_ISL_97570	A/chicken/Guizhou/E29/2010	Y280B	Y280B	TRUE
EPI_ISL_97577	A/chicken/Guizhou/E3/2010	Y280B	Y280B	TRUE
EPI_ISL_97575	A/chicken/Guizhou/E9/2010	Y280B	Y280B	TRUE
EPI_ISL_97701	A/chicken/Guizhou/J22/2011	Y280B	Y280B	TRUE
EPI_ISL_83290	A/chicken/Guizhou/Q16/2009	Y280B	Y280B	TRUE
EPI_ISL_83289	A/chicken/Guizhou/Q6/2009	Y280B	Y280B	TRUE
EPI_ISL_99616	A/chicken/Guizhou/XK04/2011	Y280B	Y280B	TRUE
EPI_ISL_98006	A/chicken/Hainan/A13/2011	Y280B	Y280B	TRUE
EPI_ISL_98005	A/chicken/Hainan/A26/2011	Y280B	Y280B	TRUE
EPI_ISL_98004	A/chicken/Hainan/A4/2011	Y280B	Y280B	TRUE
EPI_ISL_97997	A/chicken/Hainan/J13/2011	Y280B	Y280B	TRUE
EPI_ISL_97995	A/chicken/Hainan/J19/2011	Y280B	Y280B	TRUE
EPI_ISL_97992	A/chicken/Hainan/J3/2011	Y280B	Y280B	TRUE
EPI_ISL_97989	A/chicken/Hainan/J5/2011	Y280B	Y280B	TRUE
EPI_ISL_97988	A/chicken/Hainan/J6/2011	Y280B	Y280B	TRUE
EPI_ISL_89649	A/chicken/Hainan/Q4/2010	Y280B	Y280B	TRUE
EPI_ISL_84330	A/chicken/Hebei/0329/2007	Y280B	Y280B	TRUE
EPI_ISL_84329	A/chicken/Hebei/0617/2007	Y280B	Y280B	TRUE
EPI_ISL_84328	A/chicken/Hebei/0822/2007	Y280B	Y280B	TRUE
EPI_ISL_3447	A/chicken/Hebei/1/01	Y280B	Y280B	TRUE
EPI_ISL_2171	A/chicken/Hebei/2/00	Y280B	Y280B	TRUE
EPI_ISL_24723	A/chicken/Hebei/2/2002	Y280B	Y280B	TRUE
EPI_ISL_2444	A/chicken/Hebei/2/98	Y280B	Y280B	TRUE
EPI_ISL_2445	A/chicken/Hebei/3/98	Y280B	Y280B	TRUE
EPI_ISL_8503	A/chicken/Hebei/31/00	Y280B	Y280B	TRUE
EPI_ISL_2235	A/chicken/Hebei/4/98	Y280B	Y280B	TRUE
EPI_ISL_13995	A/chicken/Hebei/B1/2001	Y280B	Y280B	TRUE
EPI_ISL_84327	A/chicken/Hebei/C6/2007	Y280B	Y280B	TRUE
EPI_ISL_84326	A/chicken/Hebei/LC/2008	Y280B	Y280B	TRUE
EPI_ISL_74001	A/chicken/Heibei/8/2003	Y280B	Y280B	TRUE
EPI_ISL_8505	A/chicken/Heilongjiang/48/01	Y280B	Y280B	TRUE
EPI_ISL_24709	A/chicken/Henan/1/2001	Y280B	Y280B	TRUE
EPI_ISL_67372	A/chicken/Henan/1/2003	Y280B	Y280B	TRUE
EPI_ISL_8506	A/chicken/Henan/26/00	Y280B	Y280B	TRUE
EPI_ISL_8507	A/chicken/Henan/43/02	Y280B	Y280B	TRUE
EPI_ISL_24710	A/chicken/Henan/5/2001	Y280B	Y280B	TRUE
EPI_ISL_8508	A/chicken/Henan/5/98	Y280B	Y280B	TRUE
EPI_ISL_2237	A/chicken/Henan/62/00	Y280B	Y280B	TRUE
EPI_ISL_24711	A/chicken/Henan/622/2006	Y280B	Y280B	TRUE
EPI_ISL_68577	A/chicken/Henan/98	Y280B	Y280B	TRUE
EPI_ISL_97583	A/chicken/Henan/A16/2010	Y280B	Y280B	TRUE
EPI_ISL_12623	A/chicken/Henan/A3/1998	Y280B	Y280B	TRUE
EPI_ISL_97985	A/chicken/Henan/B16/2011	Y280B	Y280B	TRUE
EPI_ISL_97984	A/chicken/Henan/B19/2011	Y280B	Y280B	TRUE
EPI_ISL_97983	A/chicken/Henan/B6/2011	Y280B	Y280B	TRUE
EPI_ISL_97634	A/chicken/Henan/B8/2010	Y280B	Y280B	TRUE
EPI_ISL_97700	A/chicken/Henan/D17/2011	Y280B	Y280B	TRUE
EPI_ISL_97981	A/chicken/Henan/D21/2011	Y280B	Y280B	TRUE
EPI_ISL_97633	A/chicken/Henan/E1/2010	Y280B	Y280B	TRUE
EPI_ISL_97979	A/chicken/Henan/E1/2011	Y280B	Y280B	TRUE
EPI_ISL_97978	A/chicken/Henan/E10/2011	Y280B	Y280B	TRUE
EPI_ISL_97973	A/chicken/Henan/E18/2011	Y280B	Y280B	TRUE
EPI_ISL_97632	A/chicken/Henan/E2/2010	Y280B	Y280B	TRUE
EPI_ISL_97972	A/chicken/Henan/E2/2011	Y280B	Y280B	TRUE
EPI_ISL_97971	A/chicken/Henan/E21/2011	Y280B	Y280B	TRUE
EPI_ISL_97970	A/chicken/Henan/E24/2011	Y280B	Y280B	TRUE
EPI_ISL_97963	A/chicken/Henan/F10/2011	Y280B	Y280B	TRUE
EPI_ISL_97962	A/chicken/Henan/F12/2011	Y280B	Y280B	TRUE
EPI_ISL_97630	A/chicken/Henan/F14/2010	Y280B	Y280B	TRUE
EPI_ISL_97958	A/chicken/Henan/F16/2011	Y280B	Y280B	TRUE
EPI_ISL_97629	A/chicken/Henan/F17/2010	Y280B	Y280B	TRUE
EPI_ISL_97628	A/chicken/Henan/F18/2010	Y280B	Y280B	TRUE
EPI_ISL_97627	A/chicken/Henan/F20/2010	Y280B	Y280B	TRUE
EPI_ISL_97626	A/chicken/Henan/F21/2010	Y280B	Y280B	TRUE
EPI_ISL_97955	A/chicken/Henan/F21/2011	Y280B	Y280B	TRUE
EPI_ISL_97947	A/chicken/Henan/F5/2011	Y280B	Y280B	TRUE
EPI_ISL_97631	A/chicken/Henan/F8/2010	Y280B	Y280B	TRUE
EPI_ISL_97625	A/chicken/Henan/G1/2010	Y280B	Y280B	TRUE
EPI_ISL_97619	A/chicken/Henan/G11/2010	Y280B	Y280B	TRUE
EPI_ISL_97617	A/chicken/Henan/G15/2010	Y280B	Y280B	TRUE
EPI_ISL_97942	A/chicken/Henan/G15/2011	Y280B	Y280B	TRUE
EPI_ISL_97941	A/chicken/Henan/G17/2011	Y280B	Y280B	TRUE
EPI_ISL_97615	A/chicken/Henan/G19/2010	Y280B	Y280B	TRUE
EPI_ISL_97940	A/chicken/Henan/G19/2011	Y280B	Y280B	TRUE
EPI_ISL_97614	A/chicken/Henan/G20/2010	Y280B	Y280B	TRUE
EPI_ISL_97934	A/chicken/Henan/G27/2011	Y280B	Y280B	TRUE
EPI_ISL_97624	A/chicken/Henan/G4/2010	Y280B	Y280B	TRUE
EPI_ISL_97924	A/chicken/Henan/H11/2011	Y280B	Y280B	TRUE
EPI_ISL_97922	A/chicken/Henan/H15/2011	Y280B	Y280B	TRUE
EPI_ISL_97920	A/chicken/Henan/H19/2011	Y280B	Y280B	TRUE
EPI_ISL_97919	A/chicken/Henan/H22/2011	Y280B	Y280B	TRUE
EPI_ISL_97917	A/chicken/Henan/H24/2011	Y280B	Y280B	TRUE
EPI_ISL_97915	A/chicken/Henan/H26/2011	Y280B	Y280B	TRUE
EPI_ISL_97914	A/chicken/Henan/H27/2011	Y280B	Y280B	TRUE
EPI_ISL_97912	A/chicken/Henan/H29/2011	Y280B	Y280B	TRUE
EPI_ISL_97910	A/chicken/Henan/H5/2011	Y280B	Y280B	TRUE
EPI_ISL_97909	A/chicken/Henan/H6/2011	Y280B	Y280B	TRUE
EPI_ISL_97907	A/chicken/Henan/I23/2011	Y280B	Y280B	TRUE
EPI_ISL_97905	A/chicken/Henan/I27/2011	Y280B	Y280B	TRUE
EPI_ISL_97901	A/chicken/Henan/J14/2011	Y280B	Y280B	TRUE
EPI_ISL_97898	A/chicken/Henan/J22/2011	Y280B	Y280B	TRUE
EPI_ISL_97890	A/chicken/Henan/K1/2011	Y280B	Y280B	TRUE
EPI_ISL_97886	A/chicken/Henan/K19/2011	Y280B	Y280B	TRUE
EPI_ISL_3216	A/chicken/Hong_Kong/WF2/99	Y280B	Y280B	TRUE
EPI_ISL_4452	A/chicken/HongKong/AP45/03	Y280B	Y280B	TRUE
EPI_ISL_4453	A/chicken/HongKong/BD90/03	Y280B	Y280B	TRUE
EPI_ISL_4451	A/chicken/HongKong/CSW153/03	Y280B	Y280B	TRUE
EPI_ISL_4454	A/chicken/HongKong/CSW291/03	Y280B	Y280B	TRUE
EPI_ISL_4455	A/chicken/HongKong/CSW304/03	Y280B	Y280B	TRUE
EPI_ISL_4456	A/chicken/HongKong/FY23/03	Y280B	Y280B	TRUE
EPI_ISL_4458	A/chicken/HongKong/NT142/03	Y280B	Y280B	TRUE
EPI_ISL_4467	A/chicken/HongKong/NT366/03	Y280B	Y280B	TRUE
EPI_ISL_4459	A/chicken/HongKong/SF1/03	Y280B	Y280B	TRUE
EPI_ISL_4460	A/chicken/HongKong/SSP101/03	Y280B	Y280B	TRUE
EPI_ISL_4468	A/chicken/HongKong/SSP418/03	Y280B	Y280B	TRUE
EPI_ISL_4461	A/chicken/HongKong/TP38/03	Y280B	Y280B	TRUE
EPI_ISL_4466	A/chicken/HongKong/WF120/03	Y280B	Y280B	TRUE
EPI_ISL_4462	A/chicken/HongKong/WF126/03	Y280B	Y280B	TRUE
EPI_ISL_4469	A/chicken/HongKong/YU427/03	Y280B	Y280B	TRUE
EPI_ISL_69859	A/chicken/Hubei	Y280B	Y280B	TRUE
EPI_ISL_96868	A/chicken/Hubei/01/1999	Y280B	Y280B	TRUE
EPI_ISL_97682	A/chicken/Hubei/558/2011	Y280B	Y280B	TRUE
EPI_ISL_97681	A/chicken/Hubei/580/2011	Y280B	Y280B	TRUE
EPI_ISL_97680	A/chicken/Hubei/581/2011	Y280B	Y280B	TRUE
EPI_ISL_97679	A/chicken/Hubei/661/2011	Y280B	Y280B	TRUE
EPI_ISL_97553	A/chicken/Hubei/A1/2010	Y280B	Y280B	TRUE
EPI_ISL_97551	A/chicken/Hubei/A23/2010	Y280B	Y280B	TRUE
EPI_ISL_97550	A/chicken/Hubei/A25/2010	Y280B	Y280B	TRUE
EPI_ISL_97549	A/chicken/Hubei/A27/2010	Y280B	Y280B	TRUE
EPI_ISL_97548	A/chicken/Hubei/A28/2010	Y280B	Y280B	TRUE
EPI_ISL_97546	A/chicken/Hubei/A30/2010	Y280B	Y280B	TRUE
EPI_ISL_97552	A/chicken/Hubei/A4/2010	Y280B	Y280B	TRUE
EPI_ISL_98260	A/chicken/Hubei/B23/2009	Y280B	Y280B	TRUE
EPI_ISL_97543	A/chicken/Hubei/D17/2010	Y280B	Y280B	TRUE
EPI_ISL_97544	A/chicken/Hubei/D2/2010	Y280B	Y280B	TRUE
EPI_ISL_69396	A/chicken/Hubei/E13/2008	Y280B	Y280B	TRUE
EPI_ISL_97536	A/chicken/Hubei/E13/2010	Y280B	Y280B	TRUE
EPI_ISL_97534	A/chicken/Hubei/E16/2010	Y280B	Y280B	TRUE
EPI_ISL_97533	A/chicken/Hubei/E17/2010	Y280B	Y280B	TRUE
EPI_ISL_97532	A/chicken/Hubei/E18/2010	Y280B	Y280B	TRUE
EPI_ISL_97531	A/chicken/Hubei/E19/2010	Y280B	Y280B	TRUE
EPI_ISL_97530	A/chicken/Hubei/E20/2010	Y280B	Y280B	TRUE
EPI_ISL_97528	A/chicken/Hubei/E23/2010	Y280B	Y280B	TRUE
EPI_ISL_97539	A/chicken/Hubei/E8/2010	Y280B	Y280B	TRUE
EPI_ISL_69395	A/chicken/Hubei/E9/2008	Y280B	Y280B	TRUE
EPI_ISL_97538	A/chicken/Hubei/E9/2010	Y280B	Y280B	TRUE
EPI_ISL_97520	A/chicken/Hubei/G10/2010	Y280B	Y280B	TRUE
EPI_ISL_97518	A/chicken/Hubei/G19/2010	Y280B	Y280B	TRUE
EPI_ISL_97525	A/chicken/Hubei/G2/2010	Y280B	Y280B	TRUE
EPI_ISL_97517	A/chicken/Hubei/G21/2010	Y280B	Y280B	TRUE
EPI_ISL_97516	A/chicken/Hubei/G27/2010	Y280B	Y280B	TRUE
EPI_ISL_97524	A/chicken/Hubei/G4/2010	Y280B	Y280B	TRUE
EPI_ISL_97523	A/chicken/Hubei/G5/2010	Y280B	Y280B	TRUE
EPI_ISL_97522	A/chicken/Hubei/G6/2010	Y280B	Y280B	TRUE
EPI_ISL_97521	A/chicken/Hubei/G9/2010	Y280B	Y280B	TRUE
EPI_ISL_89723	A/chicken/Hubei/GYC/2011	Y280B	Y280B	TRUE
EPI_ISL_69398	A/chicken/Hubei/HE27/2008	Y280B	Y280B	TRUE
EPI_ISL_89730	A/chicken/Hubei/HWC/2011	Y280B	Y280B	TRUE
EPI_ISL_98297	A/chicken/Hubei/J9/2009	Y280B	Y280B	TRUE
EPI_ISL_99617	A/chicken/Hubei/LLM03/2011	Y280B	Y280B	TRUE
EPI_ISL_98295	A/chicken/Hubei/N11/2009	Y280B	Y280B	TRUE
EPI_ISL_98293	A/chicken/Hubei/X21/2009	Y280B	Y280B	TRUE
EPI_ISL_89729	A/chicken/Hubei/ZWC/2011	Y280B	Y280B	TRUE
EPI_ISL_7373	A/chicken/Hunan/2536/2005	Y280B	Y280B	TRUE
EPI_ISL_7374	A/chicken/Hunan/2903/2005	Y280B	Y280B	TRUE
EPI_ISL_7375	A/chicken/Hunan/3369/2005	Y280B	Y280B	TRUE
EPI_ISL_7378	A/chicken/Hunan/4444/2005	Y280B	Y280B	TRUE
EPI_ISL_7379	A/chicken/Hunan/5260/2005	Y280B	Y280B	TRUE
EPI_ISL_7380	A/chicken/Hunan/5700/2005	Y280B	Y280B	TRUE
EPI_ISL_7381	A/chicken/Hunan/6108/2005	Y280B	Y280B	TRUE
EPI_ISL_29150	A/chicken/Hunan/HA17/2007	Y280B	Y280B	TRUE
EPI_ISL_29149	A/chicken/Hunan/HB25/2007	Y280B	Y280B	TRUE
EPI_ISL_29148	A/chicken/Hunan/HB29/2007	Y280B	Y280B	TRUE
EPI_ISL_29166	A/chicken/Hunan/HB5/2007	Y280B	Y280B	TRUE
EPI_ISL_29167	A/chicken/Hunan/HE5/2007	Y280B	Y280B	TRUE
EPI_ISL_29147	A/chicken/Hunan/HG29/2007	Y280B	Y280B	TRUE
EPI_ISL_89704	A/chicken/Hunan/U6/2010	Y280B	Y280B	TRUE
EPI_ISL_73326	A/chicken/Jiande/01/2009	Y280B	Y280B	TRUE
EPI_ISL_8510	A/chicken/Jiangsu/1/00	Y280B	Y280B	TRUE
EPI_ISL_97567	A/chicken/Jiangsu/A11/2010	Y280B	Y280B	TRUE
EPI_ISL_97566	A/chicken/Jiangsu/A13/2010	Y280B	Y280B	TRUE
EPI_ISL_97565	A/chicken/Jiangsu/A20/2010	Y280B	Y280B	TRUE
EPI_ISL_97569	A/chicken/Jiangsu/A7/2010	Y280B	Y280B	TRUE
EPI_ISL_97568	A/chicken/Jiangsu/A9/2010	Y280B	Y280B	TRUE
EPI_ISL_97880	A/chicken/Jiangsu/B12/2011	Y280B	Y280B	TRUE
EPI_ISL_97879	A/chicken/Jiangsu/B13/2011	Y280B	Y280B	TRUE
EPI_ISL_97877	A/chicken/Jiangsu/B16/2011	Y280B	Y280B	TRUE
EPI_ISL_97871	A/chicken/Jiangsu/B25/2011	Y280B	Y280B	TRUE
EPI_ISL_97870	A/chicken/Jiangsu/B27/2011	Y280B	Y280B	TRUE
EPI_ISL_97869	A/chicken/Jiangsu/B3/2011	Y280B	Y280B	TRUE
EPI_ISL_97867	A/chicken/Jiangsu/B4/2011	Y280B	Y280B	TRUE
EPI_ISL_97866	A/chicken/Jiangsu/B5/2011	Y280B	Y280B	TRUE
EPI_ISL_97865	A/chicken/Jiangsu/B6/2011	Y280B	Y280B	TRUE
EPI_ISL_97862	A/chicken/Jiangsu/D10/2011	Y280B	Y280B	TRUE
EPI_ISL_97861	A/chicken/Jiangsu/D8/2011	Y280B	Y280B	TRUE
EPI_ISL_69397	A/chicken/Jiangsu/E26/2007	Y280B	Y280B	TRUE
EPI_ISL_99618	A/chicken/Jiangsu/FQD03/2011	Y280B	Y280B	TRUE
EPI_ISL_97612	A/chicken/Jiangsu/G12/2010	Y280B	Y280B	TRUE
EPI_ISL_97561	A/chicken/Jiangsu/H10/2010	Y280B	Y280B	TRUE
EPI_ISL_97860	A/chicken/Jiangsu/H10/2011	Y280B	Y280B	TRUE
EPI_ISL_97560	A/chicken/Jiangsu/H11/2010	Y280B	Y280B	TRUE
EPI_ISL_97859	A/chicken/Jiangsu/H13/2011	Y280B	Y280B	TRUE
EPI_ISL_97858	A/chicken/Jiangsu/H2/2011	Y280B	Y280B	TRUE
EPI_ISL_97557	A/chicken/Jiangsu/H25/2010	Y280B	Y280B	TRUE
EPI_ISL_97857	A/chicken/Jiangsu/H27/2011	Y280B	Y280B	TRUE
EPI_ISL_97856	A/chicken/Jiangsu/H3/2011	Y280B	Y280B	TRUE
EPI_ISL_97564	A/chicken/Jiangsu/H4/2010	Y280B	Y280B	TRUE
EPI_ISL_97563	A/chicken/Jiangsu/H6/2010	Y280B	Y280B	TRUE
EPI_ISL_97853	A/chicken/Jiangsu/I2/2011	Y280B	Y280B	TRUE
EPI_ISL_97852	A/chicken/Jiangsu/I20/2011	Y280B	Y280B	TRUE
EPI_ISL_97851	A/chicken/Jiangsu/I8/2011	Y280B	Y280B	TRUE
EPI_ISL_89740	A/chicken/Jiangsu/LWC/2011	Y280B	Y280B	TRUE
EPI_ISL_89650	A/chicken/Jiangsu/Q3/2010	Y280B	Y280B	TRUE
EPI_ISL_89647	A/chicken/Jiangsu/Q7/2010	Y280B	Y280B	TRUE
EPI_ISL_89646	A/chicken/Jiangsu/U1/2010	Y280B	Y280B	TRUE
EPI_ISL_89645	A/chicken/Jiangsu/U2/2010	Y280B	Y280B	TRUE
EPI_ISL_89644	A/chicken/Jiangsu/U3/2010	Y280B	Y280B	TRUE
EPI_ISL_89734	A/chicken/Jiangsu/WXY/2011	Y280B	Y280B	TRUE
EPI_ISL_89727	A/chicken/Jiangsu/ZHM/2011	Y280B	Y280B	TRUE
EPI_ISL_84325	A/chicken/Jiangxi/12/2007	Y280B	Y280B	TRUE
EPI_ISL_98222	A/chicken/Jilin/147/2009	Y280B	Y280B	TRUE
EPI_ISL_98313	A/chicken/Jilin/181/2009	Y280B	Y280B	TRUE
EPI_ISL_98348	A/chicken/Jilin/2/2009	Y280B	Y280B	TRUE
EPI_ISL_98343	A/chicken/Jilin/209/2009	Y280B	Y280B	TRUE
EPI_ISL_98273	A/chicken/Jilin/43/2009	Y280B	Y280B	TRUE
EPI_ISL_8509	A/chicken/Jilin/53/01	Y280B	Y280B	TRUE
EPI_ISL_98270	A/chicken/Jilin/63/2009	Y280B	Y280B	TRUE
EPI_ISL_83291	A/chicken/Jilin/G12/2009	Y280B	Y280B	TRUE
EPI_ISL_98347	A/chicken/Jilin/M19/2009	Y280B	Y280B	TRUE
EPI_ISL_98346	A/chicken/Jilin/X27/2009	Y280B	Y280B	TRUE
EPI_ISL_98268	A/chicken/Jilin/Y20/2009	Y280B	Y280B	TRUE
EPI_ISL_2159	A/chicken/Liaoning/1/00	Y280B	Y280B	TRUE
EPI_ISL_2160	A/chicken/Liaoning/2/00	Y280B	Y280B	TRUE
EPI_ISL_63461	A/chicken/Liaoning/21/7/2007	Y280B	Y280B	TRUE
EPI_ISL_29160	A/chicken/Liaoning/3/2007	Y280B	Y280B	TRUE
EPI_ISL_63462	A/chicken/Liaoning/41/17/2007	Y280B	Y280B	TRUE
EPI_ISL_68503	A/chicken/Liaoning/99	Y280B	Y280B	TRUE
EPI_ISL_84546	A/chicken/Lincang/711/2008	Y280B	Y280B	TRUE
EPI_ISL_3197	A/chicken/Nanchang/4-301/2001	Y280B	Y280B	TRUE
EPI_ISL_97699	A/chicken/Ningxia/04/2011	Y280B	Y280B	TRUE
EPI_ISL_97693	A/chicken/Ningxia/101/2011	Y280B	Y280B	TRUE
EPI_ISL_97692	A/chicken/Ningxia/102/2011	Y280B	Y280B	TRUE
EPI_ISL_97691	A/chicken/Ningxia/112/2011	Y280B	Y280B	TRUE
EPI_ISL_97689	A/chicken/Ningxia/153/2011	Y280B	Y280B	TRUE
EPI_ISL_97684	A/chicken/Ningxia/189/2011	Y280B	Y280B	TRUE
EPI_ISL_97698	A/chicken/Ningxia/29/2011	Y280B	Y280B	TRUE
EPI_ISL_97696	A/chicken/Ningxia/31/2011	Y280B	Y280B	TRUE
EPI_ISL_8512	A/chicken/Ningxia/4/99	Y280B	Y280B	TRUE
EPI_ISL_97695	A/chicken/Ningxia/47/2011	Y280B	Y280B	TRUE
EPI_ISL_97694	A/chicken/Ningxia/99/2011	Y280B	Y280B	TRUE
EPI_ISL_97848	A/chicken/Ningxia/A1/2011	Y280B	Y280B	TRUE
EPI_ISL_97846	A/chicken/Ningxia/A15/2011	Y280B	Y280B	TRUE
EPI_ISL_98329	A/chicken/Ningxia/A18/2009	Y280B	Y280B	TRUE
EPI_ISL_97845	A/chicken/Ningxia/A2/2011	Y280B	Y280B	TRUE
EPI_ISL_97844	A/chicken/Ningxia/A21/2011	Y280B	Y280B	TRUE
EPI_ISL_97840	A/chicken/Ningxia/A8/2011	Y280B	Y280B	TRUE
EPI_ISL_98333	A/chicken/Ningxia/E24/2009	Y280B	Y280B	TRUE
EPI_ISL_83292	A/chicken/Ningxia/F15/2009	Y280B	Y280B	TRUE
EPI_ISL_98330	A/chicken/Ningxia/N22/2009	Y280B	Y280B	TRUE
EPI_ISL_83293	A/chicken/Ningxia/R13/2009	Y280B	Y280B	TRUE
EPI_ISL_83294	A/chicken/Ningxia/S17/2009	Y280B	Y280B	TRUE
EPI_ISL_342	A/chicken/Osaka/aq19/2001	Y280B	Y280B	TRUE
EPI_ISL_336	A/chicken/Osaka/aq58/2001	Y280B	Y280B	TRUE
EPI_ISL_84538	A/chicken/Puer/411/2009	Y280B	Y280B	TRUE
EPI_ISL_74004	A/chicken/Sandong/Li/2008	Y280B	Y280B	TRUE
EPI_ISL_68602	A/chicken/Shandong/1/1998	Y280B	Y280B	TRUE
EPI_ISL_67390	A/chicken/Shandong/1/2003	Y280B	Y280B	TRUE
EPI_ISL_65632	A/chicken/Shandong/1/2004	Y280B	Y280B	TRUE
EPI_ISL_84324	A/chicken/Shandong/1/2006	Y280B	Y280B	TRUE
EPI_ISL_2161	A/chicken/Shandong/1/98	Y280B	Y280B	TRUE
EPI_ISL_84323	A/chicken/Shandong/12/2008	Y280B	Y280B	TRUE
EPI_ISL_84321	A/chicken/Shandong/1231/2008	Y280B	Y280B	TRUE
EPI_ISL_4851	A/chicken/Shandong/2/02	Y280B	Y280B	TRUE
EPI_ISL_2162	A/chicken/Shandong/2/99	Y280B	Y280B	TRUE
EPI_ISL_84322	A/chicken/Shandong/22/2008	Y280B	Y280B	TRUE
EPI_ISL_80509	A/chicken/Shandong/A1/2009	Y280B	Y280B	TRUE
EPI_ISL_97249	A/chicken/Shandong/B/2009	Y280B	Y280B	TRUE
EPI_ISL_68379	A/chicken/Shandong/B1/2000	Y280B	Y280B	TRUE
EPI_ISL_77227	A/chicken/Shandong/BD/2009	Y280B	Y280B	TRUE
EPI_ISL_82193	A/chicken/Shandong/C/2009	Y280B	Y280B	TRUE
EPI_ISL_24731	A/chicken/Shandong/cy1127/2007	Y280B	Y280B	TRUE
EPI_ISL_97248	A/chicken/Shandong/E/2010	Y280B	Y280B	TRUE
EPI_ISL_77200	A/chicken/Shandong/FX/2009	Y280B	Y280B	TRUE
EPI_ISL_97837	A/chicken/Shandong/H30/2011	Y280B	Y280B	TRUE
EPI_ISL_97836	A/chicken/Shandong/H7/2011	Y280B	Y280B	TRUE
EPI_ISL_77198	A/chicken/Shandong/HY/2009	Y280B	Y280B	TRUE
EPI_ISL_97834	A/chicken/Shandong/J6/2011	Y280B	Y280B	TRUE
EPI_ISL_77230	A/chicken/Shandong/JN/1999	Y280B	Y280B	TRUE
EPI_ISL_97247	A/chicken/Shandong/K/2010	Y280B	Y280B	TRUE
EPI_ISL_97246	A/chicken/Shandong/L/2010	Y280B	Y280B	TRUE
EPI_ISL_24732	A/chicken/Shandong/lc1124/2007	Y280B	Y280B	TRUE
EPI_ISL_77231	A/chicken/Shandong/LW/1999	Y280B	Y280B	TRUE
EPI_ISL_24737	A/chicken/Shandong/lx1023/2007	Y280B	Y280B	TRUE
EPI_ISL_24738	A/chicken/Shandong/lx1027/2007	Y280B	Y280B	TRUE
EPI_ISL_24740	A/chicken/Shandong/lx1129/2007	Y280B	Y280B	TRUE
EPI_ISL_24733	A/chicken/Shandong/lx316/2008	Y280B	Y280B	TRUE
EPI_ISL_24716	A/chicken/Shandong/lx827/2007	Y280B	Y280B	TRUE
EPI_ISL_84315	A/chicken/Shandong/LY/2003	Y280B	Y280B	TRUE
EPI_ISL_84320	A/chicken/Shandong/LY/2006	Y280B	Y280B	TRUE
EPI_ISL_77232	A/chicken/Shandong/LY/2008	Y280B	Y280B	TRUE
EPI_ISL_97245	A/chicken/Shandong/M/2010	Y280B	Y280B	TRUE
EPI_ISL_24741	A/chicken/Shandong/mp1224/2007	Y280B	Y280B	TRUE
EPI_ISL_97244	A/chicken/Shandong/N/2010	Y280B	Y280B	TRUE
EPI_ISL_77197	A/chicken/Shandong/PD/2009	Y280B	Y280B	TRUE
EPI_ISL_24920	A/chicken/Shandong/qd04/2007	Y280B	Y280B	TRUE
EPI_ISL_77233	A/chicken/Shandong/S2/2005	Y280B	Y280B	TRUE
EPI_ISL_77201	A/chicken/Shandong/SG1/2009	Y280B	Y280B	TRUE
EPI_ISL_77202	A/chicken/Shandong/SG2/2009	Y280B	Y280B	TRUE
EPI_ISL_97602	A/chicken/Shandong/TH9/2010	Y280B	Y280B	TRUE
EPI_ISL_24922	A/chicken/Shandong/wd01/2007	Y280B	Y280B	TRUE
EPI_ISL_97830	A/chicken/Shandong/WE11/2011	Y280B	Y280B	TRUE
EPI_ISL_97823	A/chicken/Shandong/WE26/2011	Y280B	Y280B	TRUE
EPI_ISL_97812	A/chicken/Shandong/WG10/2011	Y280B	Y280B	TRUE
EPI_ISL_97810	A/chicken/Shandong/WG16/2011	Y280B	Y280B	TRUE
EPI_ISL_77199	A/chicken/Shandong/WL/2009	Y280B	Y280B	TRUE
EPI_ISL_24742	A/chicken/Shandong/yt1105/2007	Y280B	Y280B	TRUE
EPI_ISL_24730	A/chicken/Shandong/zc820/2006	Y280B	Y280B	TRUE
EPI_ISL_3462	A/chicken/Shanghai/1/02	Y280B	Y280B	TRUE
EPI_ISL_25005	A/chicken/Shanghai/1/2002	Y280B	Y280B	TRUE
EPI_ISL_25006	A/chicken/Shanghai/2/2002	Y280B	Y280B	TRUE
EPI_ISL_7480	A/chicken/Shantou/1126/2001	Y280B	Y280B	TRUE
EPI_ISL_7313	A/chicken/Shantou/1138/2004	Y280B	Y280B	TRUE
EPI_ISL_7481	A/chicken/Shantou/1205/2001	Y280B	Y280B	TRUE
EPI_ISL_7300	A/chicken/Shantou/1404/2003	Y280B	Y280B	TRUE
EPI_ISL_7337	A/chicken/Shantou/14907/2005	Y280B	Y280B	TRUE
EPI_ISL_7476	A/chicken/Shantou/1579/2000	Y280B	Y280B	TRUE
EPI_ISL_7483	A/chicken/Shantou/1608/2001	Y280B	Y280B	TRUE
EPI_ISL_7484	A/chicken/Shantou/1610/2001	Y280B	Y280B	TRUE
EPI_ISL_7301	A/chicken/Shantou/1689/2003	Y280B	Y280B	TRUE
EPI_ISL_7338	A/chicken/Shantou/17139/2005	Y280B	Y280B	TRUE
EPI_ISL_7485	A/chicken/Shantou/1890/2001	Y280B	Y280B	TRUE
EPI_ISL_7315	A/chicken/Shantou/1926/2004	Y280B	Y280B	TRUE
EPI_ISL_7339	A/chicken/Shantou/19465/2005	Y280B	Y280B	TRUE
EPI_ISL_7340	A/chicken/Shantou/20817/2005	Y280B	Y280B	TRUE
EPI_ISL_7479	A/chicken/Shantou/2098/2000	Y280B	Y280B	TRUE
EPI_ISL_7473	A/chicken/Shantou/212/2000	Y280B	Y280B	TRUE
EPI_ISL_7293	A/chicken/Shantou/2204/2002	Y280B	Y280B	TRUE
EPI_ISL_7341	A/chicken/Shantou/22054/2005	Y280B	Y280B	TRUE
EPI_ISL_7342	A/chicken/Shantou/22504/2005	Y280B	Y280B	TRUE
EPI_ISL_7316	A/chicken/Shantou/2402/2004	Y280B	Y280B	TRUE
EPI_ISL_7302	A/chicken/Shantou/2686/2003	Y280B	Y280B	TRUE
EPI_ISL_7317	A/chicken/Shantou/2692/2004	Y280B	Y280B	TRUE
EPI_ISL_7487	A/chicken/Shantou/2712/2001	Y280B	Y280B	TRUE
EPI_ISL_7318	A/chicken/Shantou/2994/2004	Y280B	Y280B	TRUE
EPI_ISL_7303	A/chicken/Shantou/3040/2003	Y280B	Y280B	TRUE
EPI_ISL_7488	A/chicken/Shantou/3173/2001	Y280B	Y280B	TRUE
EPI_ISL_7304	A/chicken/Shantou/3341/2003	Y280B	Y280B	TRUE
EPI_ISL_7489	A/chicken/Shantou/3778/2001	Y280B	Y280B	TRUE
EPI_ISL_7290	A/chicken/Shantou/4/2002	Y280B	Y280B	TRUE
EPI_ISL_7305	A/chicken/Shantou/4101/2003	Y280B	Y280B	TRUE
EPI_ISL_7294	A/chicken/Shantou/4144/2002	Y280B	Y280B	TRUE
EPI_ISL_7490	A/chicken/Shantou/4208/2001	Y280B	Y280B	TRUE
EPI_ISL_7295	A/chicken/Shantou/4342/2002	Y280B	Y280B	TRUE
EPI_ISL_7291	A/chicken/Shantou/439/2002	Y280B	Y280B	TRUE
EPI_ISL_7296	A/chicken/Shantou/4608/2002	Y280B	Y280B	TRUE
EPI_ISL_7308	A/chicken/Shantou/4617/2003	Y280B	Y280B	TRUE
EPI_ISL_7319	A/chicken/Shantou/4726/2004	Y280B	Y280B	TRUE
EPI_ISL_7491	A/chicken/Shantou/5028/2001	Y280B	Y280B	TRUE
EPI_ISL_7292	A/chicken/Shantou/526/2002	Y280B	Y280B	TRUE
EPI_ISL_7334	A/chicken/Shantou/5269/2005	Y280B	Y280B	TRUE
EPI_ISL_7492	A/chicken/Shantou/5319/2001	Y280B	Y280B	TRUE
EPI_ISL_7328	A/chicken/Shantou/55/2005	Y280B	Y280B	TRUE
EPI_ISL_7320	A/chicken/Shantou/5630/2004	Y280B	Y280B	TRUE
EPI_ISL_7289	A/chicken/Shantou/5714/2001	Y280B	Y280B	TRUE
EPI_ISL_7323	A/chicken/Shantou/6319/2004	Y280B	Y280B	TRUE
EPI_ISL_7297	A/chicken/Shantou/69/2003	Y280B	Y280B	TRUE
EPI_ISL_7325	A/chicken/Shantou/6911/2004	Y280B	Y280B	TRUE
EPI_ISL_7327	A/chicken/Shantou/7920/2004	Y280B	Y280B	TRUE
EPI_ISL_7298	A/chicken/Shantou/944/2003	Y280B	Y280B	TRUE
EPI_ISL_7309	A/chicken/Shantou/99/2004	Y280B	Y280B	TRUE
EPI_ISL_7336	A/chicken/Shantou/9909/2005	Y280B	Y280B	TRUE
EPI_ISL_97676	A/chicken/Shanxi/38/2011	Y280B	Y280B	TRUE
EPI_ISL_97675	A/chicken/Shanxi/39/2011	Y280B	Y280B	TRUE
EPI_ISL_97674	A/chicken/Shanxi/43/2011	Y280B	Y280B	TRUE
EPI_ISL_97804	A/chicken/Shanxi/B2/2011	Y280B	Y280B	TRUE
EPI_ISL_97803	A/chicken/Shanxi/B21/2011	Y280B	Y280B	TRUE
EPI_ISL_97799	A/chicken/Shanxi/B29/2011	Y280B	Y280B	TRUE
EPI_ISL_97798	A/chicken/Shanxi/B3/2011	Y280B	Y280B	TRUE
EPI_ISL_97796	A/chicken/Shanxi/D24/2011	Y280B	Y280B	TRUE
EPI_ISL_97795	A/chicken/Shanxi/D25/2011	Y280B	Y280B	TRUE
EPI_ISL_97794	A/chicken/Shanxi/D30/2011	Y280B	Y280B	TRUE
EPI_ISL_97793	A/chicken/Shanxi/D4/2011	Y280B	Y280B	TRUE
EPI_ISL_97792	A/chicken/Shanxi/E30/2011	Y280B	Y280B	TRUE
EPI_ISL_97790	A/chicken/Shanxi/F17/2011	Y280B	Y280B	TRUE
EPI_ISL_83287	A/chicken/Shanxi/H14/2009	Y280B	Y280B	TRUE
EPI_ISL_97771	A/chicken/Shanxi/J4/2011	Y280B	Y280B	TRUE
EPI_ISL_97769	A/chicken/Shanxi/K1/2011	Y280B	Y280B	TRUE
EPI_ISL_97768	A/chicken/Shanxi/K10/2011	Y280B	Y280B	TRUE
EPI_ISL_97767	A/chicken/Shanxi/K16/2011	Y280B	Y280B	TRUE
EPI_ISL_69401	A/chicken/Sichuan/B1/2007	Y280B	Y280B	TRUE
EPI_ISL_24744	A/chicken/Sichuan/bs1210/2007	Y280B	Y280B	TRUE
EPI_ISL_69402	A/chicken/Sichuan/G2/2009	Y280B	Y280B	TRUE
EPI_ISL_69403	A/chicken/Sichuan/G3/2009	Y280B	Y280B	TRUE
EPI_ISL_69404	A/chicken/Sichuan/G4/2009	Y280B	Y280B	TRUE
EPI_ISL_69405	A/chicken/Sichuan/G5/2009	Y280B	Y280B	TRUE
EPI_ISL_69406	A/chicken/Sichuan/G6/2009	Y280B	Y280B	TRUE
EPI_ISL_98277	A/chicken/Tianjin/B24/2009	Y280B	Y280B	TRUE
EPI_ISL_98221	A/chicken/Tianjin/F17/2009	Y280B	Y280B	TRUE
EPI_ISL_98282	A/chicken/Tianjin/F2/2009	Y280B	Y280B	TRUE
EPI_ISL_83296	A/chicken/Tibet/L18/2009	Y280B	Y280B	TRUE
EPI_ISL_83295	A/chicken/Tibet/L7/2009	Y280B	Y280B	TRUE
EPI_ISL_89114	A/chicken/Tibet/S1/2009	Y280B	Y280B	TRUE
EPI_ISL_89115	A/chicken/Tibet/S4/2009	Y280B	Y280B	TRUE
EPI_ISL_84541	A/chicken/Wenshan/412/2009	Y280B	Y280B	TRUE
EPI_ISL_83284	A/chicken/Xinjiang/02/2009	Y280B	Y280B	TRUE
EPI_ISL_83285	A/chicken/Xinjiang/05/2009	Y280B	Y280B	TRUE
EPI_ISL_83286	A/chicken/Xinjiang/07/2009	Y280B	Y280B	TRUE
EPI_ISL_29145	A/chicken/Xinjiang/XJ154/2007	Y280B	Y280B	TRUE
EPI_ISL_29146	A/chicken/Xinjiang/XJ75/2007	Y280B	Y280B	TRUE
EPI_ISL_77234	A/chicken/Yangzhou/YZ/2000	Y280B	Y280B	TRUE
EPI_ISL_13563	A/chicken/YN/BanNa2/2006	Y280B	Y280B	TRUE
EPI_ISL_341	A/chicken/Yokohama/aq120/2001	Y280B	Y280B	TRUE
EPI_ISL_340	A/chicken/Yokohama/aq135/2001	Y280B	Y280B	TRUE
EPI_ISL_343	A/chicken/Yokohama/aq144/2001	Y280B	Y280B	TRUE
EPI_ISL_334	A/chicken/Yokohama/aq55/2001	Y280B	Y280B	TRUE
EPI_ISL_13760	A/chicken/Yunnan/BaoShan3/2007	Y280B	Y280B	TRUE
EPI_ISL_13761	A/chicken/Yunnan/Chuxiong1/2007	Y280B	Y280B	TRUE
EPI_ISL_13762	A/chicken/Yunnan/Chuxiong2/2007	Y280B	Y280B	TRUE
EPI_ISL_13763	A/chicken/Yunnan/Chuxiong3/2007	Y280B	Y280B	TRUE
EPI_ISL_13764	A/chicken/Yunnan/Dehong1/2007	Y280B	Y280B	TRUE
EPI_ISL_64342	A/chicken/Yunnan/Diqing/2006	Y280B	Y280B	TRUE
EPI_ISL_63467	A/chicken/Yunnan/Honghe/2007	Y280B	Y280B	TRUE
EPI_ISL_63468	A/chicken/Yunnan/Kunming/2007	Y280B	Y280B	TRUE
EPI_ISL_19170	A/chicken/Yunnan/qujing09/07	Y280B	Y280B	TRUE
EPI_ISL_13768	A/chicken/Yunnan/Simao1/2006	Y280B	Y280B	TRUE
EPI_ISL_13769	A/chicken/Yunnan/Simao3/2007	Y280B	Y280B	TRUE
EPI_ISL_63469	A/chicken/Yunnan/Wenshan/2007	Y280B	Y280B	TRUE
EPI_ISL_29144	A/chicken/Yunnan/YA114/2007	Y280B	Y280B	TRUE
EPI_ISL_29143	A/chicken/Yunnan/YC12/2007	Y280B	Y280B	TRUE
EPI_ISL_13771	A/chicken/Yunnan/Yuxi2/2007	Y280B	Y280B	TRUE
EPI_ISL_63470	A/chicken/Yunnan/Zhaotong/2007	Y280B	Y280B	TRUE
EPI_ISL_84548	A/chicken/Yunnanbn/411/2009	Y280B	Y280B	TRUE
EPI_ISL_84545	A/chicken/Yunnandh/101/2008	Y280B	Y280B	TRUE
EPI_ISL_84547	A/chicken/Yunnanws/102/2008	Y280B	Y280B	TRUE
EPI_ISL_69441	A/chicken/Zhejiang/E5/2009	Y280B	Y280B	TRUE
EPI_ISL_89726	A/chicken/Zhejiang/FSQ/2011	Y280B	Y280B	TRUE
EPI_ISL_69437	A/chicken/Zhejiang/HE1/2009	Y280B	Y280B	TRUE
EPI_ISL_69439	A/chicken/Zhejiang/HE2/2009	Y280B	Y280B	TRUE
EPI_ISL_69434	A/chicken/Zhejiang/HE3/2009	Y280B	Y280B	TRUE
EPI_ISL_69435	A/chicken/Zhejiang/HE7/2009	Y280B	Y280B	TRUE
EPI_ISL_69433	A/chicken/Zhejiang/HF2/2009	Y280B	Y280B	TRUE
EPI_ISL_69432	A/chicken/Zhejiang/HF3/2009	Y280B	Y280B	TRUE
EPI_ISL_69438	A/chicken/Zhejiang/HF4/2009	Y280B	Y280B	TRUE
EPI_ISL_69436	A/chicken/Zhejiang/HF5/2009	Y280B	Y280B	TRUE
EPI_ISL_63471	A/chicken/Zhejiang/HJ/2007	Y280B	Y280B	TRUE
EPI_ISL_89738	A/chicken/Zhejiang/LAC/2011	Y280B	Y280B	TRUE
EPI_ISL_89651	A/chicken/Zhejiang/Q1D4/2010	Y280B	Y280B	TRUE
EPI_ISL_89653	A/chicken/Zhejiang/SJL/2009	Y280B	Y280B	TRUE
EPI_ISL_89711	A/chicken/Zhejiang/SYX/2010	Y280B	Y280B	TRUE
EPI_ISL_29168	A/chicken/Zhejiang/ZC28/2007	Y280B	Y280B	TRUE
EPI_ISL_29169	A/chicken/Zhejiang/ZG1/2007	Y280B	Y280B	TRUE
EPI_ISL_89737	A/chicken/Zhejiang/ZLB/2011	Y280B	Y280B	TRUE
EPI_ISL_7426	A/chukkar/Shantou/4635/2003	Y280B	Y280B	TRUE
EPI_ISL_7445	A/chukkar/Shantou/5866/2004	Y280B	Y280B	TRUE
EPI_ISL_9795	A/Ck/HK/CSW161/2003	Y280B	Y280B	TRUE
EPI_ISL_9789	A/Ck/HK/NT142/2003	Y280B	Y280B	TRUE
EPI_ISL_9790	A/Ck/HK/WF126/2003	Y280B	Y280B	TRUE
EPI_ISL_9792	A/Ck/HK/YU463/2003	Y280B	Y280B	TRUE
EPI_ISL_9793	A/Ck/HK/YU577/2003	Y280B	Y280B	TRUE
EPI_ISL_97764	A/duck/Anhui/B13/2011	Y280B	Y280B	TRUE
EPI_ISL_97649	A/duck/Anhui/B21/2010	Y280B	Y280B	TRUE
EPI_ISL_97648	A/duck/Anhui/B24/2010	Y280B	Y280B	TRUE
EPI_ISL_97763	A/duck/Anhui/F26/2011	Y280B	Y280B	TRUE
EPI_ISL_97635	A/duck/Anhui/G27/2010	Y280B	Y280B	TRUE
EPI_ISL_84318	A/duck/Beijing/31/2005	Y280B	Y280B	TRUE
EPI_ISL_84334	A/duck/Beijing/MG0617/2005	Y280B	Y280B	TRUE
EPI_ISL_69873	A/duck/China	Y280B	Y280B	TRUE
EPI_ISL_97760	A/duck/Chongqing/D23/2011	Y280B	Y280B	TRUE
EPI_ISL_83491	A/duck/Fujian/FQ107/2007	Y280B	Y280B	TRUE
EPI_ISL_100152	A/duck/Fujian/FQ2/2007	Y280B	Y280B	TRUE
EPI_ISL_69400	A/duck/Fujian/T14/2007	Y280B	Y280B	TRUE
EPI_ISL_69399	A/duck/Fujian/T7/2007	Y280B	Y280B	TRUE
EPI_ISL_69420	A/duck/Guangdong/810/2009	Y280B	Y280B	TRUE
EPI_ISL_98218	A/duck/Guangdong/A14/2009	Y280B	Y280B	TRUE
EPI_ISL_98225	A/duck/Guangdong/A70/2009	Y280B	Y280B	TRUE
EPI_ISL_97609	A/duck/Guangdong/G19/2010	Y280B	Y280B	TRUE
EPI_ISL_97608	A/duck/Guangdong/G20/2010	Y280B	Y280B	TRUE
EPI_ISL_97605	A/duck/Guangdong/G23/2010	Y280B	Y280B	TRUE
EPI_ISL_97604	A/duck/Guangdong/G24/2010	Y280B	Y280B	TRUE
EPI_ISL_23097	A/duck/Guangdong/GZ02/2007	Y280B	Y280B	TRUE
EPI_ISL_1266	A/duck/Hong_Kong/Y280/97	Y280B	Y280B	TRUE
EPI_ISL_84539	A/duck/Honghe/111/2009	Y280B	Y280B	TRUE
EPI_ISL_97526	A/duck/Hubei/F1/2010	Y280B	Y280B	TRUE
EPI_ISL_10144	A/duck/Hubei/W1/2004	Y280B	Y280B	TRUE
EPI_ISL_67748	A/duck/Jiangsu/1/2002	Y280B	Y280B	TRUE
EPI_ISL_8922	A/duck/Nanchang/4-361/2001	Y280B	Y280B	TRUE
EPI_ISL_7406	A/duck/Shantou/12560/2005	Y280B	Y280B	TRUE
EPI_ISL_2298	A/duck/Shantou/1796/00	Y280B	Y280B	TRUE
EPI_ISL_2296	A/duck/Shantou/1881/00	Y280B	Y280B	TRUE
EPI_ISL_2299	A/duck/Shantou/2088/01	Y280B	Y280B	TRUE
EPI_ISL_2297	A/duck/Shantou/2143/00	Y280B	Y280B	TRUE
EPI_ISL_2295	A/duck/Shantou/2144/00	Y280B	Y280B	TRUE
EPI_ISL_7394	A/duck/Shantou/32/2002	Y280B	Y280B	TRUE
EPI_ISL_7397	A/duck/Shantou/3460/2003	Y280B	Y280B	TRUE
EPI_ISL_7390	A/duck/Shantou/3549/2001	Y280B	Y280B	TRUE
EPI_ISL_7400	A/duck/Shantou/3577/2003	Y280B	Y280B	TRUE
EPI_ISL_7402	A/duck/Shantou/3728/2003	Y280B	Y280B	TRUE
EPI_ISL_7395	A/duck/Shantou/4103/2002	Y280B	Y280B	TRUE
EPI_ISL_7396	A/duck/Shantou/4359/2002	Y280B	Y280B	TRUE
EPI_ISL_7404	A/duck/Shantou/515/2004	Y280B	Y280B	TRUE
EPI_ISL_7391	A/duck/Shantou/5401/2001	Y280B	Y280B	TRUE
EPI_ISL_7392	A/duck/Shantou/5459/2001	Y280B	Y280B	TRUE
EPI_ISL_7393	A/duck/Shantou/5753/2001	Y280B	Y280B	TRUE
EPI_ISL_89133	A/duck/Tibet/S2/2009	Y280B	Y280B	TRUE
EPI_ISL_34047	A/duck/Zhejiang/3/2002	Y280B	Y280B	TRUE
EPI_ISL_70187	A/environment/Hunan/1-18/2007	Y280B	Y280B	TRUE
EPI_ISL_70188	A/environment/Hunan/1-23/2007	Y280B	Y280B	TRUE
EPI_ISL_70189	A/environment/Hunan/1-70/2007	Y280B	Y280B	TRUE
EPI_ISL_70190	A/environment/Hunan/1-81/2007	Y280B	Y280B	TRUE
EPI_ISL_70191	A/environment/Hunan/2-84/2007	Y280B	Y280B	TRUE
EPI_ISL_70192	A/environment/Hunan/5-38/2007	Y280B	Y280B	TRUE
EPI_ISL_70193	A/feces/Hunan/2-28/2007	Y280B	Y280B	TRUE
EPI_ISL_70194	A/feces/Hunan/3-91/2007	Y280B	Y280B	TRUE
EPI_ISL_9796	A/Gf/HK/NT101/2003	Y280B	Y280B	TRUE
EPI_ISL_97759	A/goose/Jilin/K5/2011	Y280B	Y280B	TRUE
EPI_ISL_98290	A/goose/Tianjin/H1/2009	Y280B	Y280B	TRUE
EPI_ISL_19166	A/goose/Yunnan/chuxiong07/07	Y280B	Y280B	TRUE
EPI_ISL_7398	A/Guinea_fowl/Shantou/1677/2000	Y280B	Y280B	TRUE
EPI_ISL_7444	A/Guinea_fowl/Shantou/5852/2004	Y280B	Y280B	TRUE
EPI_ISL_7453	A/Guinea_fowl/Shantou/6627/2004	Y280B	Y280B	TRUE
EPI_ISL_7465	A/Guinea_fowl/Shantou/8955/2005	Y280B	Y280B	TRUE
EPI_ISL_4457	A/guineafowl/HongKong/NT101/03	Y280B	Y280B	TRUE
EPI_ISL_69735	A/Hong_Kong/3239/2008	Y280B	Y280B	TRUE
EPI_ISL_7482	A/partridge/Shantou/2617/2001	Y280B	Y280B	TRUE
EPI_ISL_7413	A/partridge/Shantou/2803/2003	Y280B	Y280B	TRUE
EPI_ISL_7414	A/partridge/Shantou/3487/2003	Y280B	Y280B	TRUE
EPI_ISL_7299	A/partridge/Shantou/3720/2001	Y280B	Y280B	TRUE
EPI_ISL_7419	A/partridge/Shantou/3987/2003	Y280B	Y280B	TRUE
EPI_ISL_7422	A/partridge/Shantou/4321/2003	Y280B	Y280B	TRUE
EPI_ISL_7408	A/partridge/Shantou/4525/2002	Y280B	Y280B	TRUE
EPI_ISL_7442	A/partridge/Shantou/4648/2004	Y280B	Y280B	TRUE
EPI_ISL_7332	A/partridge/Shantou/49/2002	Y280B	Y280B	TRUE
EPI_ISL_7449	A/partridge/Shantou/5692/2000	Y280B	Y280B	TRUE
EPI_ISL_7446	A/partridge/Shantou/6004/2004	Y280B	Y280B	TRUE
EPI_ISL_7460	A/partridge/Shantou/645/2001	Y280B	Y280B	TRUE
EPI_ISL_7455	A/partridge/Shantou/7075/2004	Y280B	Y280B	TRUE
EPI_ISL_7461	A/partridge/Shantou/7936/2004	Y280B	Y280B	TRUE
EPI_ISL_4464	A/pheasant/HongKong/WF54/03	Y280B	Y280B	TRUE
EPI_ISL_7462	A/pheasant/Shantou/111/2005	Y280B	Y280B	TRUE
EPI_ISL_7417	A/pheasant/Shantou/3716/2003	Y280B	Y280B	TRUE
EPI_ISL_7423	A/pheasant/Shantou/4340/2003	Y280B	Y280B	TRUE
EPI_ISL_7431	A/pheasant/Shantou/45/2004	Y280B	Y280B	TRUE
EPI_ISL_7443	A/pheasant/Shantou/5588/2004	Y280B	Y280B	TRUE
EPI_ISL_7452	A/pheasant/Shantou/6607/2004	Y280B	Y280B	TRUE
EPI_ISL_7456	A/pheasant/Shantou/7315/2004	Y280B	Y280B	TRUE
EPI_ISL_4463	A/pigeon/HongKong/WF53/03	Y280B	Y280B	TRUE
EPI_ISL_3185	A/Pigeon/Nanchang/2-0461/2000	Y280B	Y280B	TRUE
EPI_ISL_2244	A/quail/Shanghai/8/96	Y280B	Y280B	TRUE
EPI_ISL_11278	A/quail/Shantou/1158/2001	Y280B	Y280B	TRUE
EPI_ISL_11273	A/quail/Shantou/1820/2000	Y280B	Y280B	TRUE
EPI_ISL_11332	A/quail/Shantou/2200/2005	Y280B	Y280B	TRUE
EPI_ISL_11309	A/quail/Shantou/2615/2003	Y280B	Y280B	TRUE
EPI_ISL_11330	A/quail/Shantou/299/2005	Y280B	Y280B	TRUE
EPI_ISL_11333	A/quail/Shantou/3143/2005	Y280B	Y280B	TRUE
EPI_ISL_11312	A/quail/Shantou/3502/2003	Y280B	Y280B	TRUE
EPI_ISL_11315	A/quail/Shantou/3856/2003	Y280B	Y280B	TRUE
EPI_ISL_11316	A/quail/Shantou/4038/2003	Y280B	Y280B	TRUE
EPI_ISL_11331	A/quail/Shantou/493/2005	Y280B	Y280B	TRUE
EPI_ISL_11334	A/quail/Shantou/5011/2005	Y280B	Y280B	TRUE
EPI_ISL_11291	A/quail/Shantou/5675/2001	Y280B	Y280B	TRUE
EPI_ISL_11325	A/quail/Shantou/6046/2004	Y280B	Y280B	TRUE
EPI_ISL_11326	A/quail/Shantou/6648/2004	Y280B	Y280B	TRUE
EPI_ISL_11327	A/quail/Shantou/6794/2004	Y280B	Y280B	TRUE
EPI_ISL_11328	A/quail/Shantou/7397/2004	Y280B	Y280B	TRUE
EPI_ISL_11329	A/quail/Shantou/7731/2004	Y280B	Y280B	TRUE
EPI_ISL_11296	A/quail/Shantou/786/2002	Y280B	Y280B	TRUE
EPI_ISL_11277	A/quail/Shantou/850/2001	Y280B	Y280B	TRUE
EPI_ISL_11335	A/quail/Shantou/8993/2005	Y280B	Y280B	TRUE
EPI_ISL_9791	A/SCk/HK/WF285/2003	Y280B	Y280B	TRUE
EPI_ISL_9794	A/SCk/HK/YU663/2003	Y280B	Y280B	TRUE
EPI_ISL_3044	A/Shaoguan/408/98	Y280B	Y280B	TRUE
EPI_ISL_3045	A/Shaoguan/447/98	Y280B	Y280B	TRUE
EPI_ISL_7330	A/silky_chicken/Shantou/1169/2005	Y280B	Y280B	TRUE
EPI_ISL_7478	A/silky_chicken/Shantou/1818/2000	Y280B	Y280B	TRUE
EPI_ISL_7314	A/silky_chicken/Shantou/1826/2004	Y280B	Y280B	TRUE
EPI_ISL_7331	A/silky_chicken/Shantou/2131/2005	Y280B	Y280B	TRUE
EPI_ISL_7486	A/silky_chicken/Shantou/2619/2001	Y280B	Y280B	TRUE
EPI_ISL_7333	A/silky_chicken/Shantou/3581/2005	Y280B	Y280B	TRUE
EPI_ISL_7329	A/silky_chicken/Shantou/459/2005	Y280B	Y280B	TRUE
EPI_ISL_7307	A/silky_chicken/Shantou/4600/2003	Y280B	Y280B	TRUE
EPI_ISL_7322	A/silky_chicken/Shantou/6020/2004	Y280B	Y280B	TRUE
EPI_ISL_7326	A/silky_chicken/Shantou/7790/2004	Y280B	Y280B	TRUE
EPI_ISL_70610	A/sparrow/Guangxi/11/2005	Y280B	Y280B	TRUE
EPI_ISL_70611	A/sparrow/Guangxi/31/2006	Y280B	Y280B	TRUE
EPI_ISL_70612	A/sparrow/Guangxi/47/2006	Y280B	Y280B	TRUE
EPI_ISL_65625	A/swine/Guangdong/wxl/2004	Y280B	Y280B	TRUE
EPI_ISL_81611	A/swine/Guangxi/10/2007	Y280B	Y280B	TRUE
EPI_ISL_81608	A/swine/Guangxi/7/2007	Y280B	Y280B	TRUE
EPI_ISL_81609	A/swine/Guangxi/8/2007	Y280B	Y280B	TRUE
EPI_ISL_81610	A/swine/Guangxi/9/2007	Y280B	Y280B	TRUE
EPI_ISL_10593	A/swine/Henan/2/2004	Y280B	Y280B	TRUE
EPI_ISL_10587	A/swine/Henan/3/2004	Y280B	Y280B	TRUE
EPI_ISL_10588	A/swine/Henan/4/2004	Y280B	Y280B	TRUE
EPI_ISL_10590	A/swine/Henan/5/2004	Y280B	Y280B	TRUE
EPI_ISL_10594	A/swine/Henan/6/2004	Y280B	Y280B	TRUE
EPI_ISL_10589	A/swine/Henan/7/2004	Y280B	Y280B	TRUE
EPI_ISL_10591	A/swine/Henan/8/2004	Y280B	Y280B	TRUE
EPI_ISL_15583	A/swine/Jiangxi/1/2004	Y280B	Y280B	TRUE
EPI_ISL_15584	A/swine/Jiangxi/wx2/2004	Y280B	Y280B	TRUE
EPI_ISL_84439	A/swine/Taizhou/5/2008	Y280B	Y280B	TRUE
EPI_ISL_84440	A/swine/Yangzhou/1/2008	Y280B	Y280B	TRUE
EPI_ISL_3192	A/wild_duck/Nanchang/2-0480/2000	Y280B	Y280B	TRUE
EPI_ISL_24706	A/chicken/Beijing/3/2001	Y280B-like	Y280B-like	TRUE
EPI_ISL_24707	A/chicken/Guangdong/11/1999	Y280B-like	Y280B-like	TRUE
EPI_ISL_24719	A/chicken/Guangdong/2/2000	Y280B-like	Y280B-like	TRUE
EPI_ISL_24725	A/chicken/Heilongjiang/2/2002	Y280B-like	Y280B-like	TRUE
EPI_ISL_24727	A/chicken/Jiangsu/nj15/2001	Y280B-like	Y280B-like	TRUE
EPI_ISL_24745	A/chicken/Sichuan/xc10/2001	Y280B-like	Y280B-like	TRUE
EPI_ISL_19570	A/chicken/Guangdong/126/2002	Y280-like	Y280-like	TRUE
EPI_ISL_1269	A/chicken/Hong_Kong/739/94	Y280-like	Y280-like	TRUE
EPI_ISL_24715	A/chicken/Shandong/lx929/2007	Y280-like	Y280-like	TRUE
EPI_ISL_3042	A/chicken/Shaoguan/13/98	Y280-like	Y280-like	TRUE
EPI_ISL_3043	A/Shantou/239/98	Y280-like	Y280-like	TRUE

## Sheet: full HA1
Accession	Strain	Annotation	Prediction	Correct
EPI_ISL_85214	A/northern_shoveler/Interior_Alaska/8BM3470/2008	MN5733	HK448	FALSE
EPI_ISL_7377	A/chicken/Hunan/4246/2005	Chk_Bei	Chk_Bei	TRUE
EPI_ISL_7324	A/chicken/Shantou/6786/2004	Chk_Bei	Chk_Bei	TRUE
EPI_ISL_7412	A/chukkar/Shantou/1039/2003	Chk_Bei	Chk_Bei	TRUE
EPI_ISL_7399	A/chukkar/Shantou/1059/2002	Chk_Bei	Chk_Bei	TRUE
EPI_ISL_7437	A/chukkar/Shantou/1447/2004	Chk_Bei	Chk_Bei	TRUE
EPI_ISL_7433	A/chukkar/Shantou/290/2004	Chk_Bei	Chk_Bei	TRUE
EPI_ISL_7418	A/chukkar/Shantou/3980/2003	Chk_Bei	Chk_Bei	TRUE
EPI_ISL_7365	A/chukkar/Shantou/465/2002	Chk_Bei	Chk_Bei	TRUE
EPI_ISL_7376	A/chukkar/Shantou/469/2002	Chk_Bei	Chk_Bei	TRUE
EPI_ISL_7451	A/chukkar/Shantou/6571/2004	Chk_Bei	Chk_Bei	TRUE
EPI_ISL_2303	A/duck/Shantou/2134/00	Chk_Bei	Chk_Bei	TRUE
EPI_ISL_9788	A/Gf/HK/SSP607/2003	Chk_Bei	Chk_Bei	TRUE
EPI_ISL_7463	A/Guinea_fowl/Shantou/630/2005	Chk_Bei	Chk_Bei	TRUE
EPI_ISL_4465	A/guineafowl/HongKong/NT184/03	Chk_Bei	Chk_Bei	TRUE
EPI_ISL_9786	A/HK/2108/2003	Chk_Bei	Chk_Bei	TRUE
EPI_ISL_7436	A/partridge/Shantou/1405/2004	Chk_Bei	Chk_Bei	TRUE
EPI_ISL_7416	A/partridge/Shantou/1800/2000	Chk_Bei	Chk_Bei	TRUE
EPI_ISL_7469	A/partridge/Shantou/22102/2005	Chk_Bei	Chk_Bei	TRUE
EPI_ISL_7430	A/partridge/Shantou/25/2004	Chk_Bei	Chk_Bei	TRUE
EPI_ISL_7354	A/partridge/Shantou/354/2002	Chk_Bei	Chk_Bei	TRUE
EPI_ISL_7407	A/partridge/Shantou/3811/2002	Chk_Bei	Chk_Bei	TRUE
EPI_ISL_7420	A/partridge/Shantou/4093/2003	Chk_Bei	Chk_Bei	TRUE
EPI_ISL_7310	A/partridge/Shantou/4541/2001	Chk_Bei	Chk_Bei	TRUE
EPI_ISL_7321	A/partridge/Shantou/4829/2001	Chk_Bei	Chk_Bei	TRUE
EPI_ISL_7429	A/partridge/Shantou/4889/2003	Chk_Bei	Chk_Bei	TRUE
EPI_ISL_7434	A/partridge/Shantou/688/2004	Chk_Bei	Chk_Bei	TRUE
EPI_ISL_7457	A/partridge/Shantou/7343/2004	Chk_Bei	Chk_Bei	TRUE
EPI_ISL_7464	A/pheasant/Shantou/1578/2005	Chk_Bei	Chk_Bei	TRUE
EPI_ISL_7467	A/pheasant/Shantou/17033/2005	Chk_Bei	Chk_Bei	TRUE
EPI_ISL_7415	A/pheasant/Shantou/3530/2003	Chk_Bei	Chk_Bei	TRUE
EPI_ISL_7409	A/pheasant/Shantou/443/2003	Chk_Bei	Chk_Bei	TRUE
EPI_ISL_7428	A/pheasant/Shantou/4709/2003	Chk_Bei	Chk_Bei	TRUE
EPI_ISL_7410	A/pheasant/Shantou/511/2003	Chk_Bei	Chk_Bei	TRUE
EPI_ISL_7458	A/pheasant/Shantou/7501/2004	Chk_Bei	Chk_Bei	TRUE
EPI_ISL_7459	A/pheasant/Shantou/7814/2004	Chk_Bei	Chk_Bei	TRUE
EPI_ISL_7435	A/pheasant/Shantou/841/2004	Chk_Bei	Chk_Bei	TRUE
EPI_ISL_11297	A/quail/Shantou/1038/2002	Chk_Bei	Chk_Bei	TRUE
EPI_ISL_11305	A/quail/Shantou/1140/2003	Chk_Bei	Chk_Bei	TRUE
EPI_ISL_11272	A/quail/Shantou/1318/2000	Chk_Bei	Chk_Bei	TRUE
EPI_ISL_11282	A/quail/Shantou/1461/2001	Chk_Bei	Chk_Bei	TRUE
EPI_ISL_11338	A/quail/Shantou/15892/2005	Chk_Bei	Chk_Bei	TRUE
EPI_ISL_11306	A/quail/Shantou/1780/2003	Chk_Bei	Chk_Bei	TRUE
EPI_ISL_11307	A/quail/Shantou/1978/2003	Chk_Bei	Chk_Bei	TRUE
EPI_ISL_11340	A/quail/Shantou/20787/2005	Chk_Bei	Chk_Bei	TRUE
EPI_ISL_11269	A/quail/Shantou/243/2000	Chk_Bei	Chk_Bei	TRUE
EPI_ISL_11308	A/quail/Shantou/2608/2003	Chk_Bei	Chk_Bei	TRUE
EPI_ISL_11313	A/quail/Shantou/3700/2003	Chk_Bei	Chk_Bei	TRUE
EPI_ISL_11295	A/quail/Shantou/396/2002	Chk_Bei	Chk_Bei	TRUE
EPI_ISL_11287	A/quail/Shantou/4179/2001	Chk_Bei	Chk_Bei	TRUE
EPI_ISL_11289	A/quail/Shantou/4762/2001	Chk_Bei	Chk_Bei	TRUE
EPI_ISL_11319	A/quail/Shantou/5/2004	Chk_Bei	Chk_Bei	TRUE
EPI_ISL_7311	A/silky_chicken/Shantou/473/2004	Chk_Bei	Chk_Bei	TRUE
EPI_ISL_7312	A/silky_chicken/Shantou/999/2004	Chk_Bei	Chk_Bei	TRUE
EPI_ISL_77913	A/thick-billed_murre/Alaska/44085-155/2006	DB277	DB277	TRUE
EPI_ISL_7470	A/chukkar/Shantou/22116/2005	G1_Asia	G1_Asia	TRUE
EPI_ISL_66541	A/ferret/Maryland/P10-UMD/2008	G1_Asia	G1_Asia	TRUE
EPI_ISL_3215	A/guinea_fowl/Hong_Kong/WF10/99	G1_Asia	G1_Asia	TRUE
EPI_ISL_7471	A/Guinea_fowl/Shantou/2076/2001	G1_Asia	G1_Asia	TRUE
EPI_ISL_69733	A/Hong_Kong/33982/2009	G1_Asia	G1_Asia	TRUE
EPI_ISL_7288	A/partridge/Shantou/2875/2001	G1_Asia	G1_Asia	TRUE
EPI_ISL_11336	A/quail/Shantou/11195/2005	G1_Asia	G1_Asia	TRUE
EPI_ISL_11279	A/quail/Shantou/1235/2001	G1_Asia	G1_Asia	TRUE
EPI_ISL_11280	A/quail/Shantou/1242/2001	G1_Asia	G1_Asia	TRUE
EPI_ISL_11271	A/quail/Shantou/1310/2000	G1_Asia	G1_Asia	TRUE
EPI_ISL_11337	A/quail/Shantou/13425/2005	G1_Asia	G1_Asia	TRUE
EPI_ISL_11298	A/quail/Shantou/1551/2002	G1_Asia	G1_Asia	TRUE
EPI_ISL_11283	A/quail/Shantou/1555/2001	G1_Asia	G1_Asia	TRUE
EPI_ISL_11339	A/quail/Shantou/19506/2005	G1_Asia	G1_Asia	TRUE
EPI_ISL_11341	A/quail/Shantou/21605/2005	G1_Asia	G1_Asia	TRUE
EPI_ISL_11286	A/quail/Shantou/2462/2001	G1_Asia	G1_Asia	TRUE
EPI_ISL_11275	A/quail/Shantou/2816/2000	G1_Asia	G1_Asia	TRUE
EPI_ISL_11303	A/quail/Shantou/308/2003	G1_Asia	G1_Asia	TRUE
EPI_ISL_11314	A/quail/Shantou/3768/2003	G1_Asia	G1_Asia	TRUE
EPI_ISL_11299	A/quail/Shantou/3851/2002	G1_Asia	G1_Asia	TRUE
EPI_ISL_11317	A/quail/Shantou/4044/2003	G1_Asia	G1_Asia	TRUE
EPI_ISL_11288	A/quail/Shantou/4641/2001	G1_Asia	G1_Asia	TRUE
EPI_ISL_11318	A/quail/Shantou/4850/2003	G1_Asia	G1_Asia	TRUE
EPI_ISL_63454	A/chicken/Israel/114/2007	G1_Mideast_A	G1_Mideast_A	TRUE
EPI_ISL_19621	A/chicken/Israel/178/2006	G1_Mideast_A	G1_Mideast_A	TRUE
EPI_ISL_10376	A/chicken/Israel/1953/2004	G1_Mideast_A	G1_Mideast_A	TRUE
EPI_ISL_19622	A/chicken/Israel/282/2005	G1_Mideast_A	G1_Mideast_A	TRUE
EPI_ISL_30443	A/chicken/Israel/375/2007	G1_Mideast_A	G1_Mideast_A	TRUE
EPI_ISL_19627	A/chicken/Israel/853/2005	G1_Mideast_A	G1_Mideast_A	TRUE
EPI_ISL_19629	A/chicken/Israel/909/2005	G1_Mideast_A	G1_Mideast_A	TRUE
EPI_ISL_85779	A/chicken/Jordan/09vir579-2/2007	G1_Mideast_A	G1_Mideast_A	TRUE
EPI_ISL_85772	A/chicken/Jordan/1436-1451/2004	G1_Mideast_A	G1_Mideast_A	TRUE
EPI_ISL_85774	A/chicken/Jordan/1436-643/2004	G1_Mideast_A	G1_Mideast_A	TRUE
EPI_ISL_4535	A/ostrich/Eshkol/1436/03	G1_Mideast_A	G1_Mideast_A	TRUE
EPI_ISL_3795	A/turkey/Givat_Haim/965/02	G1_Mideast_A	G1_Mideast_A	TRUE
EPI_ISL_10375	A/turkey/Israel/1209/2003	G1_Mideast_A	G1_Mideast_A	TRUE
EPI_ISL_19623	A/turkey/Israel/425/2005	G1_Mideast_A	G1_Mideast_A	TRUE
EPI_ISL_10373	A/turkey/Israel/810/2001	G1_Mideast_A	G1_Mideast_A	TRUE
EPI_ISL_19628	A/turkey/Israel/884/2005	G1_Mideast_A	G1_Mideast_A	TRUE
EPI_ISL_62976	A/avian/Israel/313/2008	G1_Mideast_B	G1_Mideast_B	TRUE
EPI_ISL_80921	A/avian/Saudi_Arabia/910134/2006	G1_Mideast_B	G1_Mideast_B	TRUE
EPI_ISL_80922	A/avian/Saudi_Arabia/910135/2006	G1_Mideast_B	G1_Mideast_B	TRUE
EPI_ISL_80923	A/avian/Saudi_Arabia/910136/2006	G1_Mideast_B	G1_Mideast_B	TRUE
EPI_ISL_63781	A/chicken/Afghanistan/329-2vir09-AFG-Khost1/2008	G1_Mideast_B	G1_Mideast_B	TRUE
EPI_ISL_63782	A/chicken/Afghanistan/329-3vir09-AFG-Khost2/2008	G1_Mideast_B	G1_Mideast_B	TRUE
EPI_ISL_63783	A/chicken/Afghanistan/329-4vir09-AFG-Khost3/2008	G1_Mideast_B	G1_Mideast_B	TRUE
EPI_ISL_63784	A/chicken/Afghanistan/329-5vir09-AFG-Khost4/2008	G1_Mideast_B	G1_Mideast_B	TRUE
EPI_ISL_63785	A/chicken/Afghanistan/329-6vir09-AFG-Khost9/2008	G1_Mideast_B	G1_Mideast_B	TRUE
EPI_ISL_63787	A/chicken/Afghanistan/329-8vir09-AFG-Heart7/2009	G1_Mideast_B	G1_Mideast_B	TRUE
EPI_ISL_78703	A/chicken/Chandigarh/2048/2003	G1_Mideast_B	G1_Mideast_B	TRUE
EPI_ISL_85790	A/chicken/Dubai/09vir3771-3/2008	G1_Mideast_B	G1_Mideast_B	TRUE
EPI_ISL_27600	A/chicken/Haryana/2051/2003	G1_Mideast_B	G1_Mideast_B	TRUE
EPI_ISL_97221	A/chicken/India/IVRI-0004/2010	G1_Mideast_B	G1_Mideast_B	TRUE
EPI_ISL_97215	A/chicken/India/IVRI-0011/2011	G1_Mideast_B	G1_Mideast_B	TRUE
EPI_ISL_85792	A/chicken/Iran/10VIR854-3/2009	G1_Mideast_B	G1_Mideast_B	TRUE
EPI_ISL_85794	A/chicken/Iran/10VIR854-4/2009	G1_Mideast_B	G1_Mideast_B	TRUE
EPI_ISL_85791	A/chicken/Iran/10VIR854-5/2008	G1_Mideast_B	G1_Mideast_B	TRUE
EPI_ISL_65650	A/chicken/Iran/133/2004	G1_Mideast_B	G1_Mideast_B	TRUE
EPI_ISL_67377	A/chicken/Iran/320/2003	G1_Mideast_B	G1_Mideast_B	TRUE
EPI_ISL_64312	A/chicken/Iran/68/2006	G1_Mideast_B	G1_Mideast_B	TRUE
EPI_ISL_11185	A/chicken/Iran/B11A/2005	G1_Mideast_B	G1_Mideast_B	TRUE
EPI_ISL_11180	A/chicken/Iran/B308B/2004	G1_Mideast_B	G1_Mideast_B	TRUE
EPI_ISL_11186	A/chicken/Iran/B326/2005	G1_Mideast_B	G1_Mideast_B	TRUE
EPI_ISL_11182	A/chicken/Iran/B76/2004	G1_Mideast_B	G1_Mideast_B	TRUE
EPI_ISL_97042	A/chicken/Iran/EBGV-88/2010	G1_Mideast_B	G1_Mideast_B	TRUE
EPI_ISL_10545	A/chicken/Iran/L248/03	G1_Mideast_B	G1_Mideast_B	TRUE
EPI_ISL_63003	A/chicken/Iran/RZ28/2008	G1_Mideast_B	G1_Mideast_B	TRUE
EPI_ISL_63004	A/chicken/Iran/RZ36/2008	G1_Mideast_B	G1_Mideast_B	TRUE
EPI_ISL_63007	A/chicken/Iran/RZ53/2008	G1_Mideast_B	G1_Mideast_B	TRUE
EPI_ISL_63444	A/chicken/Iran/SH2/2007	G1_Mideast_B	G1_Mideast_B	TRUE
EPI_ISL_15732	A/chicken/Iran/TH186/2007	G1_Mideast_B	G1_Mideast_B	TRUE
EPI_ISL_15730	A/chicken/Iran/TH286/2007	G1_Mideast_B	G1_Mideast_B	TRUE
EPI_ISL_15731	A/chicken/Iran/TH386/2007	G1_Mideast_B	G1_Mideast_B	TRUE
EPI_ISL_29274	A/chicken/Iran/TH486-masoumi/2007	G1_Mideast_B	G1_Mideast_B	TRUE
EPI_ISL_15729	A/chicken/Iran/TH85/2007	G1_Mideast_B	G1_Mideast_B	TRUE
EPI_ISL_63445	A/chicken/Iran/THLBM861/2007	G1_Mideast_B	G1_Mideast_B	TRUE
EPI_ISL_63446	A/chicken/Iran/THLBM862/2007	G1_Mideast_B	G1_Mideast_B	TRUE
EPI_ISL_63447	A/chicken/Iran/THLBM863/2007	G1_Mideast_B	G1_Mideast_B	TRUE
EPI_ISL_63450	A/chicken/Iran/THLBM866/2007	G1_Mideast_B	G1_Mideast_B	TRUE
EPI_ISL_63452	A/chicken/Iran/THLBM868/2007	G1_Mideast_B	G1_Mideast_B	TRUE
EPI_ISL_63453	A/chicken/Israel/1033/2007	G1_Mideast_B	G1_Mideast_B	TRUE
EPI_ISL_30437	A/chicken/Israel/1040/2007	G1_Mideast_B	G1_Mideast_B	TRUE
EPI_ISL_64315	A/chicken/Israel/1548/2006	G1_Mideast_B	G1_Mideast_B	TRUE
EPI_ISL_30439	A/chicken/Israel/182/2008	G1_Mideast_B	G1_Mideast_B	TRUE
EPI_ISL_30440	A/chicken/Israel/184/2009	G1_Mideast_B	G1_Mideast_B	TRUE
EPI_ISL_63455	A/chicken/Israel/215/2007	G1_Mideast_B	G1_Mideast_B	TRUE
EPI_ISL_63457	A/chicken/Israel/402/2007	G1_Mideast_B	G1_Mideast_B	TRUE
EPI_ISL_63458	A/chicken/Israel/449/2007	G1_Mideast_B	G1_Mideast_B	TRUE
EPI_ISL_63009	A/chicken/Israel/524/2008	G1_Mideast_B	G1_Mideast_B	TRUE
EPI_ISL_30445	A/chicken/Israel/694/2008	G1_Mideast_B	G1_Mideast_B	TRUE
EPI_ISL_30446	A/chicken/Israel/702/2008	G1_Mideast_B	G1_Mideast_B	TRUE
EPI_ISL_63459	A/chicken/Israel/728/2007	G1_Mideast_B	G1_Mideast_B	TRUE
EPI_ISL_30447	A/chicken/Israel/869/2007	G1_Mideast_B	G1_Mideast_B	TRUE
EPI_ISL_30448	A/chicken/Israel/883/2008	G1_Mideast_B	G1_Mideast_B	TRUE
EPI_ISL_63460	A/chicken/Israel/933/2007	G1_Mideast_B	G1_Mideast_B	TRUE
EPI_ISL_30449	A/chicken/Israel/951/2007	G1_Mideast_B	G1_Mideast_B	TRUE
EPI_ISL_85776	A/chicken/Jordan/436-1/2010	G1_Mideast_B	G1_Mideast_B	TRUE
EPI_ISL_85777	A/chicken/Jordan/436-2/2010	G1_Mideast_B	G1_Mideast_B	TRUE
EPI_ISL_85796	A/chicken/Kurdistan/4693-9/2009	G1_Mideast_B	G1_Mideast_B	TRUE
EPI_ISL_29787	A/chicken/Pakistan/UDL-01/2005	G1_Mideast_B	G1_Mideast_B	TRUE
EPI_ISL_29789	A/chicken/Pakistan/UDL-01/2006	G1_Mideast_B	G1_Mideast_B	TRUE
EPI_ISL_29793	A/chicken/Pakistan/UDL-01/2008	G1_Mideast_B	G1_Mideast_B	TRUE
EPI_ISL_29788	A/chicken/Pakistan/UDL-02/2005	G1_Mideast_B	G1_Mideast_B	TRUE
EPI_ISL_29790	A/chicken/Pakistan/UDL-02/2006	G1_Mideast_B	G1_Mideast_B	TRUE
EPI_ISL_29794	A/chicken/Pakistan/UDL-02/2008	G1_Mideast_B	G1_Mideast_B	TRUE
EPI_ISL_29786	A/chicken/Pakistan/UDL-04/2006	G1_Mideast_B	G1_Mideast_B	TRUE
EPI_ISL_29796	A/chicken/Pakistan/UDL-04/2007	G1_Mideast_B	G1_Mideast_B	TRUE
EPI_ISL_27601	A/chicken/Punjab/2063/2003	G1_Mideast_B	G1_Mideast_B	TRUE
EPI_ISL_85798	A/chicken/Qatar/4576-4/2008	G1_Mideast_B	G1_Mideast_B	TRUE
EPI_ISL_85780	A/chicken/Saudi_Arabia/08vir3489-33-as638/2005	G1_Mideast_B	G1_Mideast_B	TRUE
EPI_ISL_85781	A/chicken/Saudi_Arabia/08vir3489-38-as92/2005	G1_Mideast_B	G1_Mideast_B	TRUE
EPI_ISL_85782	A/chicken/Saudi_Arabia/08vir3489-44-as253/2006	G1_Mideast_B	G1_Mideast_B	TRUE
EPI_ISL_85786	A/chicken/Saudi_Arabia/08vir3489-47-as215/2007	G1_Mideast_B	G1_Mideast_B	TRUE
EPI_ISL_85785	A/chicken/Saudi_Arabia/08vir3489-48-as997/2007	G1_Mideast_B	G1_Mideast_B	TRUE
EPI_ISL_85788	A/chicken/Saudi_Arabia/08vir3489-50-as118/2008	G1_Mideast_B	G1_Mideast_B	TRUE
EPI_ISL_85787	A/chicken/Saudi_Arabia/08vir3489-51-as366/2008	G1_Mideast_B	G1_Mideast_B	TRUE
EPI_ISL_83300	A/chicken/Tripura/105131/2008	G1_Mideast_B	G1_Mideast_B	TRUE
EPI_ISL_76225	A/chicken/Uchal/8286/2006	G1_Mideast_B	G1_Mideast_B	TRUE
EPI_ISL_76224	A/chicken/Uchal/8293/2006	G1_Mideast_B	G1_Mideast_B	TRUE
EPI_ISL_85784	A/falcon/Saudi_Arabia/08vir3489-40-as977/2006	G1_Mideast_B	G1_Mideast_B	TRUE
EPI_ISL_93285	A/quail/Lebanon/272/2010	G1_Mideast_B	G1_Mideast_B	TRUE
EPI_ISL_64478	A/turkey/Israel/1608/2006	G1_Mideast_B	G1_Mideast_B	TRUE
EPI_ISL_30444	A/turkey/Israel/689/2008	G1_Mideast_B	G1_Mideast_B	TRUE
EPI_ISL_69121	A/watercoot/Haryana/5844/2005	G1_Mideast_B	G1_Mideast_B	TRUE
EPI_ISL_85793	A/chicken/Iran/10VIR854-1/2002	G1_Mideast_D	G1_Mideast_D	TRUE
EPI_ISL_64828	A/chicken/Iran/119/2005	G1_Mideast_D	G1_Mideast_D	TRUE
EPI_ISL_65651	A/chicken/Iran/152/2004	G1_Mideast_D	G1_Mideast_D	TRUE
EPI_ISL_68019	A/chicken/Iran/233/2001	G1_Mideast_D	G1_Mideast_D	TRUE
EPI_ISL_68363	A/chicken/Iran/565/2000	G1_Mideast_D	G1_Mideast_D	TRUE
EPI_ISL_68364	A/chicken/Iran/584/2000	G1_Mideast_D	G1_Mideast_D	TRUE
EPI_ISL_68591	A/chicken/Iran/661/1998	G1_Mideast_D	G1_Mideast_D	TRUE
EPI_ISL_68496	A/chicken/Iran/705/1999	G1_Mideast_D	G1_Mideast_D	TRUE
EPI_ISL_64829	A/chicken/Iran/86/2005	G1_Mideast_D	G1_Mideast_D	TRUE
EPI_ISL_11179	A/chicken/Iran/B308A/2004	G1_Mideast_D	G1_Mideast_D	TRUE
EPI_ISL_11178	A/chicken/Iran/B314/2003	G1_Mideast_D	G1_Mideast_D	TRUE
EPI_ISL_15734	A/chicken/Iran/TH78/1999	G1_Mideast_D	G1_Mideast_D	TRUE
EPI_ISL_15736	A/chicken/Iran/TH80/2000	G1_Mideast_D	G1_Mideast_D	TRUE
EPI_ISL_128	A/parakeet/Narita/92A/98	G1_Mideast_D	G1_Mideast_D	TRUE
EPI_ISL_2909	A/shovelar/Iran/G54/03	G1_Mideast_D	G1_Mideast_D	TRUE
EPI_ISL_10141	A/chicken/Cheongju/ADL0401/2004	KR38349	KR38349	TRUE
EPI_ISL_13845	A/chicken/Korea/01310/2001	KR38349	KR38349	TRUE
EPI_ISL_1275	A/chicken/Korea/25232-96006/96	KR38349	KR38349	TRUE
EPI_ISL_1274	A/chicken/Korea/38349-p96323/96	KR38349	KR38349	TRUE
EPI_ISL_77209	A/chicken/Korea/A170/2009	KR38349	KR38349	TRUE
EPI_ISL_70424	A/chicken/Korea/ADL050895/2005	KR38349	KR38349	TRUE
EPI_ISL_70426	A/chicken/Korea/ADL060162/2006	KR38349	KR38349	TRUE
EPI_ISL_70427	A/chicken/Korea/ADL060168/2006	KR38349	KR38349	TRUE
EPI_ISL_70428	A/chicken/Korea/ADL060196/2006	KR38349	KR38349	TRUE
EPI_ISL_70429	A/chicken/Korea/ADL060580/2006	KR38349	KR38349	TRUE
EPI_ISL_70439	A/chicken/Korea/ADL060831/2006	KR38349	KR38349	TRUE
EPI_ISL_70430	A/chicken/Korea/ADL060845/2006	KR38349	KR38349	TRUE
EPI_ISL_70431	A/chicken/Korea/ADL060865/2006	KR38349	KR38349	TRUE
EPI_ISL_70432	A/chicken/Korea/ADL062128/2006	KR38349	KR38349	TRUE
EPI_ISL_70438	A/chicken/Korea/ADL070121/2007	KR38349	KR38349	TRUE
EPI_ISL_70436	A/chicken/Korea/ADL070801/2007	KR38349	KR38349	TRUE
EPI_ISL_68688	A/chicken/Korea/AI-96004/1996	KR38349	KR38349	TRUE
EPI_ISL_84582	A/chicken/Korea/HC09/2009	KR38349	KR38349	TRUE
EPI_ISL_68689	A/chicken/Korea/MS96-CE6/1996	KR38349	KR38349	TRUE
EPI_ISL_9886	A/chicken/Korea/S21/04	KR38349	KR38349	TRUE
EPI_ISL_4668	A/chicken/Korea/S4/03	KR38349	KR38349	TRUE
EPI_ISL_84581	A/chicken/Korea/SH0802/2008	KR38349	KR38349	TRUE
EPI_ISL_84583	A/chicken/Korea/SH0902/2009	KR38349	KR38349	TRUE
EPI_ISL_84584	A/chicken/Korea/SH0903/2009	KR38349	KR38349	TRUE
EPI_ISL_84586	A/chicken/Korea/SH0905/2009	KR38349	KR38349	TRUE
EPI_ISL_84587	A/chicken/Korea/SH0906/2009	KR38349	KR38349	TRUE
EPI_ISL_84588	A/chicken/Korea/SH0907/2009	KR38349	KR38349	TRUE
EPI_ISL_84592	A/chicken/Korea/SH0911/2009	KR38349	KR38349	TRUE
EPI_ISL_84594	A/chicken/Korea/SH0913/2009	KR38349	KR38349	TRUE
EPI_ISL_77207	A/duck/Korea/A174/2009	KR38349	KR38349	TRUE
EPI_ISL_98907	A/duck/Korea/KNUDPJ09/2009	KR38349	KR38349	TRUE
EPI_ISL_4671	A/duck/Korea/S13/03	KR38349	KR38349	TRUE
EPI_ISL_84585	A/duck/Korea/SH0904/2009	KR38349	KR38349	TRUE
EPI_ISL_84589	A/duck/Korea/SH0908/2009	KR38349	KR38349	TRUE
EPI_ISL_84593	A/duck/Korea/SH0912/2009	KR38349	KR38349	TRUE
EPI_ISL_84596	A/duck/Korea/SH0915/2009	KR38349	KR38349	TRUE
EPI_ISL_12597	A/Korea/KBNP-0028/2000	KR38349	KR38349	TRUE
EPI_ISL_4617	A/swine/Korea/S452/2004	KR38349	KR38349	TRUE
EPI_ISL_1279	A/goose/Minnesota/5733/80	MN5733	MN5733	TRUE
EPI_ISL_5800	A/laughing_gull/Delaware/2718/1987	MN5733	MN5733	TRUE
EPI_ISL_8884	A/mallard/ALB/17/1991	MN5733	MN5733	TRUE
EPI_ISL_4067	A/mallard/Alberta/11/91	MN5733	MN5733	TRUE
EPI_ISL_4047	A/mallard/Alberta/743/83	MN5733	MN5733	TRUE
EPI_ISL_8883	A/mallard_duck/ALB/321/1988	MN5733	MN5733	TRUE
EPI_ISL_99499	A/ruddy_turnstone/Delaware_Bay/2774/1987	MN5733	MN5733	TRUE
EPI_ISL_99486	A/ruddy_turnstone/Virginia/2297/1988	MN5733	MN5733	TRUE
EPI_ISL_23347	A/turkey/TX/4-1-81/1981	MN5733	MN5733	TRUE
EPI_ISL_30815	A/laughing_gull/Delaware/12/2006	SB261	SB261	TRUE
EPI_ISL_99339	A/laughing_gull/Delaware_Bay/5/2003	SB261	SB261	TRUE
EPI_ISL_84624	A/shorebird/Delaware/554/2007	SB261	SB261	TRUE
EPI_ISL_94965	A/black_swan/Morpeth/194/2008	VN340	VN340	TRUE
EPI_ISL_247	A/duck/Hokkaido/13/00	VN340	VN340	TRUE
EPI_ISL_28844	A/duck/Hokkaido/238/2008	VN340	VN340	TRUE
EPI_ISL_245	A/duck/Hokkaido/9/99	VN340	VN340	TRUE
EPI_ISL_67395	A/duck/Mongolia/564/2003	VN340	VN340	TRUE
EPI_ISL_11897	A/duck/Viet_Nam/340/2001	VN340	VN340	TRUE
EPI_ISL_11896	A/duck/Viet_Nam/68/2001	VN340	VN340	TRUE
EPI_ISL_94952	A/eastern_curlew/Stockton/4204/2008	VN340	VN340	TRUE
EPI_ISL_33856	A/gadwall/Netherlands/1/2006	VN340	VN340	TRUE
EPI_ISL_98893	A/mallard/France/090360/2009	VN340	VN340	TRUE
EPI_ISL_86201	A/mallard/Iran/T366/2007	VN340	VN340	TRUE
EPI_ISL_86202	A/mallard/Iran/T370/2007	VN340	VN340	TRUE
EPI_ISL_77452	A/mallard/PT/27972-B139/2007	VN340	VN340	TRUE
EPI_ISL_63562	A/mallard/Switzerland/WV1070805/2007	VN340	VN340	TRUE
EPI_ISL_63563	A/mallard/Switzerland/WV3080008/2007	VN340	VN340	TRUE
EPI_ISL_1488	A/ostrich/South_Africa/9508103/95	VN340	VN340	TRUE
EPI_ISL_97757	A/chicken/Anhui/A21-2/2011	Y280_Fuj_SL6	Y280_Fuj_SL6	TRUE
EPI_ISL_97658	A/chicken/Guangdong/265/2011	Y280_Fuj_SL6	Y280_Fuj_SL6	TRUE
EPI_ISL_97659	A/chicken/Guangdong/283/2011	Y280_Fuj_SL6	Y280_Fuj_SL6	TRUE
EPI_ISL_89735	A/chicken/Guangdong/CJZ/2011	Y280_Fuj_SL6	Y280_Fuj_SL6	TRUE
EPI_ISL_99612	A/chicken/Guangdong/FJC07/2011	Y280_Fuj_SL6	Y280_Fuj_SL6	TRUE
EPI_ISL_89745	A/chicken/Guangdong/FLS/2011	Y280_Fuj_SL6	Y280_Fuj_SL6	TRUE
EPI_ISL_89721	A/chicken/Guangdong/FZH/2011	Y280_Fuj_SL6	Y280_Fuj_SL6	TRUE
EPI_ISL_89748	A/chicken/Guangdong/HBQ/2011	Y280_Fuj_SL6	Y280_Fuj_SL6	TRUE
EPI_ISL_99607	A/chicken/Guangdong/HMZ11/2011	Y280_Fuj_SL6	Y280_Fuj_SL6	TRUE
EPI_ISL_89744	A/chicken/Guangdong/HYF/2011	Y280_Fuj_SL6	Y280_Fuj_SL6	TRUE
EPI_ISL_89718	A/chicken/Guangdong/LHY/2011	Y280_Fuj_SL6	Y280_Fuj_SL6	TRUE
EPI_ISL_89739	A/chicken/Guangdong/LJD/2011	Y280_Fuj_SL6	Y280_Fuj_SL6	TRUE
EPI_ISL_89743	A/chicken/Guangdong/LJH/2011	Y280_Fuj_SL6	Y280_Fuj_SL6	TRUE
EPI_ISL_89717	A/chicken/Guangdong/LSD/2011	Y280_Fuj_SL6	Y280_Fuj_SL6	TRUE
EPI_ISL_89725	A/chicken/Guangdong/LYQ/2011	Y280_Fuj_SL6	Y280_Fuj_SL6	TRUE
EPI_ISL_89732	A/chicken/Guangdong/MYS/2011	Y280_Fuj_SL6	Y280_Fuj_SL6	TRUE
EPI_ISL_89719	A/chicken/Guangdong/QZL/2011	Y280_Fuj_SL6	Y280_Fuj_SL6	TRUE
EPI_ISL_99608	A/chicken/Guangdong/SQL11/2011	Y280_Fuj_SL6	Y280_Fuj_SL6	TRUE
EPI_ISL_89706	A/chicken/Guangdong/U4/2010	Y280_Fuj_SL6	Y280_Fuj_SL6	TRUE
EPI_ISL_89720	A/chicken/Guangdong/WGH/2011	Y280_Fuj_SL6	Y280_Fuj_SL6	TRUE
EPI_ISL_89731	A/chicken/Guangdong/YJX/2011	Y280_Fuj_SL6	Y280_Fuj_SL6	TRUE
EPI_ISL_98866	A/chicken/Guangdong/ZCY/2011	Y280_Fuj_SL6	Y280_Fuj_SL6	TRUE
EPI_ISL_98865	A/chicken/Guangdong/ZHJ/2011	Y280_Fuj_SL6	Y280_Fuj_SL6	TRUE
EPI_ISL_89728	A/chicken/Guangdong/ZPY/2011	Y280_Fuj_SL6	Y280_Fuj_SL6	TRUE
EPI_ISL_99609	A/chicken/Guangxi/QCR10/2011	Y280_Fuj_SL6	Y280_Fuj_SL6	TRUE
EPI_ISL_98012	A/chicken/Guizhou/E11/2011	Y280_Fuj_SL6	Y280_Fuj_SL6	TRUE
EPI_ISL_98011	A/chicken/Guizhou/G12/2011	Y280_Fuj_SL6	Y280_Fuj_SL6	TRUE
EPI_ISL_98010	A/chicken/Guizhou/G17/2011	Y280_Fuj_SL6	Y280_Fuj_SL6	TRUE
EPI_ISL_98009	A/chicken/Guizhou/G22/2011	Y280_Fuj_SL6	Y280_Fuj_SL6	TRUE
EPI_ISL_98007	A/chicken/Guizhou/H24/2011	Y280_Fuj_SL6	Y280_Fuj_SL6	TRUE
EPI_ISL_99611	A/chicken/Guizhou/LCY09/2011	Y280_Fuj_SL6	Y280_Fuj_SL6	TRUE
EPI_ISL_97999	A/chicken/Hainan/I28/2011	Y280_Fuj_SL6	Y280_Fuj_SL6	TRUE
EPI_ISL_97998	A/chicken/Hainan/I7/2011	Y280_Fuj_SL6	Y280_Fuj_SL6	TRUE
EPI_ISL_97688	A/chicken/Ningxia/181/2011	Y280_Fuj_SL6	Y280_Fuj_SL6	TRUE
EPI_ISL_13015	A/bird/Guangxi/63/2005	Y280_G9	Y280_G9	TRUE
EPI_ISL_13016	A/bird/Guangxi/82/2005	Y280_G9	Y280_G9	TRUE
EPI_ISL_13017	A/bird/Guangxi/83/2005	Y280_G9	Y280_G9	TRUE
EPI_ISL_13021	A/bird/Guangxi/H1/2006	Y280_G9	Y280_G9	TRUE
EPI_ISL_98370	A/black-billed_magpie/Guangxi/31/2005	Y280_G9	Y280_G9	TRUE
EPI_ISL_68588	A/chicken/Anhui/1/1998	Y280_G9	Y280_G9	TRUE
EPI_ISL_2153	A/chicken/Anhui/1/98	Y280_G9	Y280_G9	TRUE
EPI_ISL_67715	A/chicken/Anhui/2/2002	Y280_G9	Y280_G9	TRUE
EPI_ISL_84317	A/chicken/Anhui/2h/2002	Y280_G9	Y280_G9	TRUE
EPI_ISL_68494	A/chicken/Beijing/ne/1999	Y280_G9	Y280_G9	TRUE
EPI_ISL_67717	A/chicken/Beijing/nl/2002	Y280_G9	Y280_G9	TRUE
EPI_ISL_24717	A/chicken/Fujian/2/2002	Y280_G9	Y280_G9	TRUE
EPI_ISL_8494	A/chicken/Fujian/25/00	Y280_G9	Y280_G9	TRUE
EPI_ISL_2234	A/chicken/Guangdong/11/97	Y280_G9	Y280_G9	TRUE
EPI_ISL_24721	A/chicken/Guangdong/16/1999	Y280_G9	Y280_G9	TRUE
EPI_ISL_8498	A/chicken/Guangdong/5/97	Y280_G9	Y280_G9	TRUE
EPI_ISL_8499	A/chicken/Guangdong/56/01	Y280_G9	Y280_G9	TRUE
EPI_ISL_8500	A/chicken/Guangdong/6/97	Y280_G9	Y280_G9	TRUE
EPI_ISL_68726	A/chicken/Guangdong/SS/94	Y280_G9	Y280_G9	TRUE
EPI_ISL_8501	A/chicken/Guangxi/10/99	Y280_G9	Y280_G9	TRUE
EPI_ISL_70608	A/chicken/Guangxi/101/2006	Y280_G9	Y280_G9	TRUE
EPI_ISL_70604	A/chicken/Guangxi/17/2007	Y280_G9	Y280_G9	TRUE
EPI_ISL_7366	A/chicken/Guangxi/187/2005	Y280_G9	Y280_G9	TRUE
EPI_ISL_7370	A/chicken/Guangxi/2389/2005	Y280_G9	Y280_G9	TRUE
EPI_ISL_13010	A/chicken/Guangxi/37/2005	Y280_G9	Y280_G9	TRUE
EPI_ISL_70606	A/chicken/Guangxi/39/2007	Y280_G9	Y280_G9	TRUE
EPI_ISL_8502	A/chicken/Guangxi/9/99	Y280_G9	Y280_G9	TRUE
EPI_ISL_78799	A/chicken/Guangxi/KMIII/1999	Y280_G9	Y280_G9	TRUE
EPI_ISL_2157	A/chicken/Hebei/1/00	Y280_G9	Y280_G9	TRUE
EPI_ISL_67722	A/chicken/Hebei/nj/2002	Y280_G9	Y280_G9	TRUE
EPI_ISL_24724	A/chicken/Hebei/sjz2/2001	Y280_G9	Y280_G9	TRUE
EPI_ISL_2236	A/chicken/Heilongjiang/10/97	Y280_G9	Y280_G9	TRUE
EPI_ISL_24918	A/chicken/Henan/01/2007	Y280_G9	Y280_G9	TRUE
EPI_ISL_65629	A/chicken/Henan/1/2004	Y280_G9	Y280_G9	TRUE
EPI_ISL_64827	A/chicken/Henan/1/2005	Y280_G9	Y280_G9	TRUE
EPI_ISL_65630	A/chicken/Henan/2/2004	Y280_G9	Y280_G9	TRUE
EPI_ISL_93809	A/chicken/Henan/N12/2009	Y280_G9	Y280_G9	TRUE
EPI_ISL_93811	A/chicken/Henan/N3/2002	Y280_G9	Y280_G9	TRUE
EPI_ISL_68018	A/chicken/Henan/ni/2001	Y280_G9	Y280_G9	TRUE
EPI_ISL_1264	A/chicken/Hong_Kong/G23/97	Y280_G9	Y280_G9	TRUE
EPI_ISL_14003	A/chicken/Hubei/C1/2007	Y280_G9	Y280_G9	TRUE
EPI_ISL_67726	A/chicken/Hunan/774/2002	Y280_G9	Y280_G9	TRUE
EPI_ISL_90381	A/chicken/Jiangsu/01/2003	Y280_G9	Y280_G9	TRUE
EPI_ISL_68599	A/chicken/Jiangsu/1/1998	Y280_G9	Y280_G9	TRUE
EPI_ISL_68502	A/chicken/Jiangsu/1/1999	Y280_G9	Y280_G9	TRUE
EPI_ISL_67729	A/chicken/Jiangsu/1/2002	Y280_G9	Y280_G9	TRUE
EPI_ISL_65631	A/chicken/Jiangsu/1/2004	Y280_G9	Y280_G9	TRUE
EPI_ISL_2151	A/chicken/Jiangsu/1/99	Y280_G9	Y280_G9	TRUE
EPI_ISL_68025	A/chicken/Jiangsu/2/2001	Y280_G9	Y280_G9	TRUE
EPI_ISL_2152	A/chicken/Jiangsu/2/98	Y280_G9	Y280_G9	TRUE
EPI_ISL_90380	A/chicken/Jiangsu/48/2001	Y280_G9	Y280_G9	TRUE
EPI_ISL_29822	A/chicken/Jiangsu/7/2002	Y280_G9	Y280_G9	TRUE
EPI_ISL_93810	A/chicken/Jiangsu/A11/2007	Y280_G9	Y280_G9	TRUE
EPI_ISL_3588	A/chicken/Jiangsu/JS-1/2002	Y280_G9	Y280_G9	TRUE
EPI_ISL_68026	A/chicken/Jiangsu/ng/2001	Y280_G9	Y280_G9	TRUE
EPI_ISL_24726	A/chicken/Jiangsu/nj13/2001	Y280_G9	Y280_G9	TRUE
EPI_ISL_335	A/chicken/Kobe/aq26/2001	Y280_G9	Y280_G9	TRUE
EPI_ISL_3692	A/chicken/Mudanjiang/0823/2000	Y280_G9	Y280_G9	TRUE
EPI_ISL_74002	A/chicken/Nanjing/13/2003	Y280_G9	Y280_G9	TRUE
EPI_ISL_67738	A/chicken/Neimonggu/nk/2002	Y280_G9	Y280_G9	TRUE
EPI_ISL_2238	A/chicken/Ningxia/5/99	Y280_G9	Y280_G9	TRUE
EPI_ISL_333	A/chicken/Osaka/aq48/97	Y280_G9	Y280_G9	TRUE
EPI_ISL_337	A/chicken/Osaka/aq69/2001	Y280_G9	Y280_G9	TRUE
EPI_ISL_82191	A/chicken/Shandong/1/2008	Y280_G9	Y280_G9	TRUE
EPI_ISL_24712	A/chicken/Shandong/2/2003	Y280_G9	Y280_G9	TRUE
EPI_ISL_84313	A/chicken/Shandong/2h/2001	Y280_G9	Y280_G9	TRUE
EPI_ISL_2240	A/chicken/Shandong/6/96	Y280_G9	Y280_G9	TRUE
EPI_ISL_8513	A/chicken/Shandong/7/96	Y280_G9	Y280_G9	TRUE
EPI_ISL_77228	A/chicken/Shandong/JN4/2005	Y280_G9	Y280_G9	TRUE
EPI_ISL_77229	A/chicken/Shandong/JN5/2005	Y280_G9	Y280_G9	TRUE
EPI_ISL_82537	A/chicken/Shandong/SD0014/2008	Y280_G9	Y280_G9	TRUE
EPI_ISL_8514	A/chicken/Shanghai/10/01	Y280_G9	Y280_G9	TRUE
EPI_ISL_25002	A/chicken/Shanghai/12/2001	Y280_G9	Y280_G9	TRUE
EPI_ISL_25003	A/chicken/Shanghai/14/2001	Y280_G9	Y280_G9	TRUE
EPI_ISL_25004	A/chicken/Shanghai/16/2001	Y280_G9	Y280_G9	TRUE
EPI_ISL_24997	A/chicken/Shanghai/2/1999	Y280_G9	Y280_G9	TRUE
EPI_ISL_2163	A/chicken/Shanghai/3/00	Y280_G9	Y280_G9	TRUE
EPI_ISL_3092	A/chicken/Shanghai/3/01	Y280_G9	Y280_G9	TRUE
EPI_ISL_24998	A/chicken/Shanghai/3/2000	Y280_G9	Y280_G9	TRUE
EPI_ISL_3093	A/chicken/Shanghai/4/01	Y280_G9	Y280_G9	TRUE
EPI_ISL_2164	A/chicken/Shanghai/4-1/01	Y280_G9	Y280_G9	TRUE
EPI_ISL_2165	A/chicken/Shanghai/4-2/01	Y280_G9	Y280_G9	TRUE
EPI_ISL_25001	A/chicken/Shanghai/7/2001	Y280_G9	Y280_G9	TRUE
EPI_ISL_68579	A/chicken/Shanghai/F/98	Y280_G9	Y280_G9	TRUE
EPI_ISL_7475	A/chicken/Shantou/1322/2000	Y280_G9	Y280_G9	TRUE
EPI_ISL_7477	A/chicken/Shantou/1690/2000	Y280_G9	Y280_G9	TRUE
EPI_ISL_7474	A/chicken/Shantou/859/2000	Y280_G9	Y280_G9	TRUE
EPI_ISL_7472	A/chicken/Shantou/94/2000	Y280_G9	Y280_G9	TRUE
EPI_ISL_2242	A/chicken/Shenzhen/9/97	Y280_G9	Y280_G9	TRUE
EPI_ISL_8515	A/chicken/Shijiazhuang/2/98	Y280_G9	Y280_G9	TRUE
EPI_ISL_2239	A/chicken/Sichuan/5/97	Y280_G9	Y280_G9	TRUE
EPI_ISL_2166	A/chicken/Tianjing/1/96	Y280_G9	Y280_G9	TRUE
EPI_ISL_2167	A/chicken/Tianjing/2/96	Y280_G9	Y280_G9	TRUE
EPI_ISL_339	A/chicken/Yokohama/aq134/2002	Y280_G9	Y280_G9	TRUE
EPI_ISL_338	A/chicken/Yokohama/aq45/2002	Y280_G9	Y280_G9	TRUE
EPI_ISL_7385	A/chicken/Yunnan/1147/2003	Y280_G9	Y280_G9	TRUE
EPI_ISL_2169	A/chicken/Yunnan/2/00	Y280_G9	Y280_G9	TRUE
EPI_ISL_7389	A/chicken/Yunnan/3727/2004	Y280_G9	Y280_G9	TRUE
EPI_ISL_7382	A/chicken/Yunnan/401/2002	Y280_G9	Y280_G9	TRUE
EPI_ISL_7386	A/chicken/Yunnan/5653/2003	Y280_G9	Y280_G9	TRUE
EPI_ISL_7384	A/chicken/Yunnan/955/2002	Y280_G9	Y280_G9	TRUE
EPI_ISL_68028	A/chicken/Yunnan/nh/2001	Y280_G9	Y280_G9	TRUE
EPI_ISL_13011	A/duck/Guangxi/51/2005	Y280_G9	Y280_G9	TRUE
EPI_ISL_29377	A/duck/Hong_Kong/W213/1997	Y280_G9	Y280_G9	TRUE
EPI_ISL_34046	A/duck/Jiangsu/9/2004	Y280_G9	Y280_G9	TRUE
EPI_ISL_67749	A/duck/Jiangsu/nf/2002	Y280_G9	Y280_G9	TRUE
EPI_ISL_2243	A/duck/Nanjing/1/97	Y280_G9	Y280_G9	TRUE
EPI_ISL_8511	A/duck/Nanjing/2/97	Y280_G9	Y280_G9	TRUE
EPI_ISL_10366	A/duck/Xuzhou/05/2001	Y280_G9	Y280_G9	TRUE
EPI_ISL_10365	A/duck/Xuzhou/07/2003	Y280_G9	Y280_G9	TRUE
EPI_ISL_10364	A/duck/Zhejiang/03/2001	Y280_G9	Y280_G9	TRUE
EPI_ISL_97019	A/environment/Hong_Kong/1226/1999	Y280_G9	Y280_G9	TRUE
EPI_ISL_1265	A/Pigeon/Hong_Kong/Y233/97	Y280_G9	Y280_G9	TRUE
EPI_ISL_13018	A/quail/Guangxi/B1/2006	Y280_G9	Y280_G9	TRUE
EPI_ISL_3199	A/quail/Nanchang/2-0460/2000	Y280_G9	Y280_G9	TRUE
EPI_ISL_70609	A/sparrow/Guangxi/09/2005	Y280_G9	Y280_G9	TRUE
EPI_ISL_70614	A/sparrow/Guangxi/121/2007	Y280_G9	Y280_G9	TRUE
EPI_ISL_70613	A/sparrow/Guangxi/93/2006	Y280_G9	Y280_G9	TRUE
EPI_ISL_12580	A/swine/Guangxi/58/2005	Y280_G9	Y280_G9	TRUE
EPI_ISL_13020	A/swine/Guangxi/FS2/2005	Y280_G9	Y280_G9	TRUE
EPI_ISL_13023	A/swine/Guangxi/S11/2005	Y280_G9	Y280_G9	TRUE
EPI_ISL_13022	A/swine/Guangxi/S15/2005	Y280_G9	Y280_G9	TRUE
EPI_ISL_141	A/swine/Hong_Kong/10/98	Y280_G9	Y280_G9	TRUE
EPI_ISL_84311	A/swine/Shandong/3/2003	Y280_G9	Y280_G9	TRUE
EPI_ISL_84312	A/swine/Shandong/8/2003	Y280_G9	Y280_G9	TRUE
EPI_ISL_67426	A/swine/Shandong/fHZ/2003	Y280_G9	Y280_G9	TRUE
EPI_ISL_67428	A/swine/Shandong/fLS/2003	Y280_G9	Y280_G9	TRUE
EPI_ISL_67430	A/swine/Shandong/fZC/2003	Y280_G9	Y280_G9	TRUE
EPI_ISL_67422	A/swine/Shandong/na/2003	Y280_G9	Y280_G9	TRUE
EPI_ISL_67423	A/swine/Shandong/nb/2003	Y280_G9	Y280_G9	TRUE
EPI_ISL_64951	A/swine/Shandong/nc/2005	Y280_G9	Y280_G9	TRUE
EPI_ISL_67424	A/swine/Shandong/w4/2003	Y280_G9	Y280_G9	TRUE
EPI_ISL_71046	A/chicken/Hebei/4/2008	Y280_Sha_ZB07	Y280_Sha_ZB07	TRUE
EPI_ISL_76661	A/chicken/Hebei/A/2007	Y280_Sha_ZB07	Y280_Sha_ZB07	TRUE
EPI_ISL_76662	A/chicken/Hebei/Y2/2009	Y280_Sha_ZB07	Y280_Sha_ZB07	TRUE
EPI_ISL_24736	A/chicken/Shandong/lx414/2007	Y280_Sha_ZB07	Y280_Sha_ZB07	TRUE
EPI_ISL_13019	A/bird/Guangxi/A1/2006	Y280B	Y280B	TRUE
EPI_ISL_93624	A/canine/Guangxi/1/2011/H9N2	Y280B	Y280B	TRUE
EPI_ISL_98117	A/chicken/Anhui/A12/2011	Y280B	Y280B	TRUE
EPI_ISL_98114	A/chicken/Anhui/A17/2011	Y280B	Y280B	TRUE
EPI_ISL_97592	A/chicken/Anhui/A25/2010	Y280B	Y280B	TRUE
EPI_ISL_29161	A/chicken/Anhui/AH16/2008	Y280B	Y280B	TRUE
EPI_ISL_29162	A/chicken/Anhui/AH23/2008	Y280B	Y280B	TRUE
EPI_ISL_29163	A/chicken/Anhui/AI16/2008	Y280B	Y280B	TRUE
EPI_ISL_29164	A/chicken/Anhui/AK13/2008	Y280B	Y280B	TRUE
EPI_ISL_29165	A/chicken/Anhui/AK25/2008	Y280B	Y280B	TRUE
EPI_ISL_97590	A/chicken/Anhui/B17-2/2010	Y280B	Y280B	TRUE
EPI_ISL_97651	A/chicken/Anhui/B18/2010	Y280B	Y280B	TRUE
EPI_ISL_97754	A/chicken/Anhui/B19/2011	Y280B	Y280B	TRUE
EPI_ISL_97753	A/chicken/Anhui/B20/2011	Y280B	Y280B	TRUE
EPI_ISL_97751	A/chicken/Anhui/B24/2011	Y280B	Y280B	TRUE
EPI_ISL_97756	A/chicken/Anhui/B6/2011	Y280B	Y280B	TRUE
EPI_ISL_97586	A/chicken/Anhui/D21/2010	Y280B	Y280B	TRUE
EPI_ISL_97747	A/chicken/Anhui/D21/2011	Y280B	Y280B	TRUE
EPI_ISL_97750	A/chicken/Anhui/D3/2011	Y280B	Y280B	TRUE
EPI_ISL_97745	A/chicken/Anhui/E15/2011	Y280B	Y280B	TRUE
EPI_ISL_98095	A/chicken/Anhui/E19/2011	Y280B	Y280B	TRUE
EPI_ISL_98087	A/chicken/Anhui/E29/2011	Y280B	Y280B	TRUE
EPI_ISL_97738	A/chicken/Anhui/F31/2011	Y280B	Y280B	TRUE
EPI_ISL_97644	A/chicken/Anhui/G12/2010	Y280B	Y280B	TRUE
EPI_ISL_97642	A/chicken/Anhui/G15/2010	Y280B	Y280B	TRUE
EPI_ISL_97734	A/chicken/Anhui/G18/2011	Y280B	Y280B	TRUE
EPI_ISL_97737	A/chicken/Anhui/G6/2011	Y280B	Y280B	TRUE
EPI_ISL_89714	A/chicken/Anhui/GQY/2011	Y280B	Y280B	TRUE
EPI_ISL_98069	A/chicken/Anhui/I24/2011	Y280B	Y280B	TRUE
EPI_ISL_98062	A/chicken/Anhui/I8/2011	Y280B	Y280B	TRUE
EPI_ISL_97720	A/chicken/Anhui/K17/2011	Y280B	Y280B	TRUE
EPI_ISL_97725	A/chicken/Anhui/K3-2/2011	Y280B	Y280B	TRUE
EPI_ISL_97717	A/chicken/Anhui/M2/2011	Y280B	Y280B	TRUE
EPI_ISL_97715	A/chicken/Anhui/M5/2011	Y280B	Y280B	TRUE
EPI_ISL_89710	A/chicken/Anhui/WANG/2010	Y280B	Y280B	TRUE
EPI_ISL_89736	A/chicken/Anhui/WBQ/2011	Y280B	Y280B	TRUE
EPI_ISL_89750	A/chicken/Anhui/XMS/2011	Y280B	Y280B	TRUE
EPI_ISL_89715	A/chicken/Anhui/ZTL/2011	Y280B	Y280B	TRUE
EPI_ISL_99613	A/chicken/Anhui/ZYX05/2011	Y280B	Y280B	TRUE
EPI_ISL_84536	A/chicken/Baoshan/111/2009	Y280B	Y280B	TRUE
EPI_ISL_84544	A/chicken/Baoshan/711/2008	Y280B	Y280B	TRUE
EPI_ISL_84333	A/chicken/Beijing/1/2006	Y280B	Y280B	TRUE
EPI_ISL_2170	A/chicken/Beijing/1/97	Y280B	Y280B	TRUE
EPI_ISL_74000	A/chicken/Beijing/19/2003	Y280B	Y280B	TRUE
EPI_ISL_2232	A/chicken/Beijing/8/98	Y280B	Y280B	TRUE
EPI_ISL_4042	A/chicken/Beijing/9/98	Y280B	Y280B	TRUE
EPI_ISL_13996	A/chicken/Beijing/L1/2005	Y280B	Y280B	TRUE
EPI_ISL_69854	A/chicken/China	Y280B	Y280B	TRUE
EPI_ISL_2851	A/chicken/China/AG518/2001	Y280B	Y280B	TRUE
EPI_ISL_90154	A/chicken/China/AH-10-01/2010	Y280B	Y280B	TRUE
EPI_ISL_10168	A/chicken/China/Guangxi1/2000	Y280B	Y280B	TRUE
EPI_ISL_10169	A/chicken/China/Guangxi14/2000	Y280B	Y280B	TRUE
EPI_ISL_10170	A/chicken/China/Guangxi17/2000	Y280B	Y280B	TRUE
EPI_ISL_97669	A/chicken/Chongqing/A56/2011	Y280B	Y280B	TRUE
EPI_ISL_97660	A/chicken/Chongqing/D17/2011	Y280B	Y280B	TRUE
EPI_ISL_98034	A/chicken/Chongqing/G10/2011	Y280B	Y280B	TRUE
EPI_ISL_98031	A/chicken/Chongqing/G14/2011	Y280B	Y280B	TRUE
EPI_ISL_98029	A/chicken/Chongqing/G21/2011	Y280B	Y280B	TRUE
EPI_ISL_98028	A/chicken/Chongqing/G23/2011	Y280B	Y280B	TRUE
EPI_ISL_98027	A/chicken/Chongqing/G25/2011	Y280B	Y280B	TRUE
EPI_ISL_97662	A/chicken/Chongqing/K10/2011	Y280B	Y280B	TRUE
EPI_ISL_97671	A/chicken/Chongqing/K16/2011	Y280B	Y280B	TRUE
EPI_ISL_97663	A/chicken/Chongqing/K23/2011	Y280B	Y280B	TRUE
EPI_ISL_97670	A/chicken/Chongqing/K3/2011	Y280B	Y280B	TRUE
EPI_ISL_97668	A/chicken/Chongqing/K4/2011	Y280B	Y280B	TRUE
EPI_ISL_97672	A/chicken/Chongqing/K7/2011	Y280B	Y280B	TRUE
EPI_ISL_84540	A/chicken/Dehong/411/2009	Y280B	Y280B	TRUE
EPI_ISL_73998	A/chicken/Fujian/11/2007	Y280B	Y280B	TRUE
EPI_ISL_7362	A/chicken/Fujian/12252/2005	Y280B	Y280B	TRUE
EPI_ISL_7344	A/chicken/Fujian/3080/2005	Y280B	Y280B	TRUE
EPI_ISL_7346	A/chicken/Fujian/4820/2005	Y280B	Y280B	TRUE
EPI_ISL_7347	A/chicken/Fujian/5214/2005	Y280B	Y280B	TRUE
EPI_ISL_7348	A/chicken/Fujian/5683/2005	Y280B	Y280B	TRUE
EPI_ISL_7356	A/chicken/Fujian/9290/2005	Y280B	Y280B	TRUE
EPI_ISL_7357	A/chicken/Fujian/9752/2005	Y280B	Y280B	TRUE
EPI_ISL_29156	A/chicken/Fujian/FB21/2007	Y280B	Y280B	TRUE
EPI_ISL_29155	A/chicken/Fujian/FB22/2007	Y280B	Y280B	TRUE
EPI_ISL_29154	A/chicken/Fujian/FG13/2007	Y280B	Y280B	TRUE
EPI_ISL_29152	A/chicken/Fujian/FH7/2007	Y280B	Y280B	TRUE
EPI_ISL_89652	A/chicken/Fujian/G9/2009	Y280B	Y280B	TRUE
EPI_ISL_99614	A/chicken/Fujian/HJF04/2011	Y280B	Y280B	TRUE
EPI_ISL_89733	A/chicken/Fujian/SL4/2011	Y280B	Y280B	TRUE
EPI_ISL_2155	A/chicken/Gangxi/1/00	Y280B	Y280B	TRUE
EPI_ISL_24917	A/chicken/Guangdong/02/2007	Y280B	Y280B	TRUE
EPI_ISL_24718	A/chicken/Guangdong/1/2002	Y280B	Y280B	TRUE
EPI_ISL_8495	A/chicken/Guangdong/21/02	Y280B	Y280B	TRUE
EPI_ISL_24722	A/chicken/Guangdong/22/2001	Y280B	Y280B	TRUE
EPI_ISL_8496	A/chicken/Guangdong/4/00	Y280B	Y280B	TRUE
EPI_ISL_8497	A/chicken/Guangdong/47/01	Y280B	Y280B	TRUE
EPI_ISL_69427	A/chicken/Guangdong/A10/2007	Y280B	Y280B	TRUE
EPI_ISL_69425	A/chicken/Guangdong/A3/2003	Y280B	Y280B	TRUE
EPI_ISL_69429	A/chicken/Guangdong/A4/2003	Y280B	Y280B	TRUE
EPI_ISL_69426	A/chicken/Guangdong/A5/2003	Y280B	Y280B	TRUE
EPI_ISL_69421	A/chicken/Guangdong/A6/2003	Y280B	Y280B	TRUE
EPI_ISL_69415	A/chicken/Guangdong/A7/2002	Y280B	Y280B	TRUE
EPI_ISL_69428	A/chicken/Guangdong/B2/2006	Y280B	Y280B	TRUE
EPI_ISL_69416	A/chicken/Guangdong/B4/2006	Y280B	Y280B	TRUE
EPI_ISL_69418	A/chicken/Guangdong/B5/2002	Y280B	Y280B	TRUE
EPI_ISL_69419	A/chicken/Guangdong/B7/2003	Y280B	Y280B	TRUE
EPI_ISL_69417	A/chicken/Guangdong/B9/2002	Y280B	Y280B	TRUE
EPI_ISL_97515	A/chicken/Guangdong/D2/2010	Y280B	Y280B	TRUE
EPI_ISL_97513	A/chicken/Guangdong/D7/2010	Y280B	Y280B	TRUE
EPI_ISL_97512	A/chicken/Guangdong/D8/2010	Y280B	Y280B	TRUE
EPI_ISL_97511	A/chicken/Guangdong/D9/2010	Y280B	Y280B	TRUE
EPI_ISL_99619	A/chicken/Guangdong/DJN03/2011	Y280B	Y280B	TRUE
EPI_ISL_69409	A/chicken/Guangdong/E23/2008	Y280B	Y280B	TRUE
EPI_ISL_69410	A/chicken/Guangdong/E24/2008	Y280B	Y280B	TRUE
EPI_ISL_69411	A/chicken/Guangdong/E25/2008	Y280B	Y280B	TRUE
EPI_ISL_69430	A/chicken/Guangdong/G7/2009	Y280B	Y280B	TRUE
EPI_ISL_23098	A/chicken/Guangdong/GZ02/2008	Y280B	Y280B	TRUE
EPI_ISL_97510	A/chicken/Guangdong/H11/2010	Y280B	Y280B	TRUE
EPI_ISL_97509	A/chicken/Guangdong/H12/2010	Y280B	Y280B	TRUE
EPI_ISL_97508	A/chicken/Guangdong/H28/2010	Y280B	Y280B	TRUE
EPI_ISL_97507	A/chicken/Guangdong/H29/2010	Y280B	Y280B	TRUE
EPI_ISL_69412	A/chicken/Guangdong/HE10/2009	Y280B	Y280B	TRUE
EPI_ISL_69424	A/chicken/Guangdong/HE12/2008	Y280B	Y280B	TRUE
EPI_ISL_69423	A/chicken/Guangdong/HE20/2008	Y280B	Y280B	TRUE
EPI_ISL_69413	A/chicken/Guangdong/HE21/2008	Y280B	Y280B	TRUE
EPI_ISL_69414	A/chicken/Guangdong/HE22/2008	Y280B	Y280B	TRUE
EPI_ISL_89648	A/chicken/Guangdong/Q6/2010	Y280B	Y280B	TRUE
EPI_ISL_7368	A/chicken/Guangxi/1032/2005	Y280B	Y280B	TRUE
EPI_ISL_7369	A/chicken/Guangxi/1428/2005	Y280B	Y280B	TRUE
EPI_ISL_70605	A/chicken/Guangxi/21/2006	Y280B	Y280B	TRUE
EPI_ISL_70607	A/chicken/Guangxi/44/2006	Y280B	Y280B	TRUE
EPI_ISL_7371	A/chicken/Guangxi/4745/2005	Y280B	Y280B	TRUE
EPI_ISL_13013	A/chicken/Guangxi/55/2005	Y280B	Y280B	TRUE
EPI_ISL_13012	A/chicken/Guangxi/6/2000	Y280B	Y280B	TRUE
EPI_ISL_69407	A/chicken/Guangxi/G8/2009	Y280B	Y280B	TRUE
EPI_ISL_99615	A/chicken/Guangxi/LRW04/2011	Y280B	Y280B	TRUE
EPI_ISL_89742	A/chicken/Guangxi/MFX/2011	Y280B	Y280B	TRUE
EPI_ISL_77226	A/chicken/Guangzhou/GZ/2005	Y280B	Y280B	TRUE
EPI_ISL_97582	A/chicken/Guizhou/A4/2010	Y280B	Y280B	TRUE
EPI_ISL_97579	A/chicken/Guizhou/D15/2010	Y280B	Y280B	TRUE
EPI_ISL_97703	A/chicken/Guizhou/D26/2011	Y280B	Y280B	TRUE
EPI_ISL_97571	A/chicken/Guizhou/E25/2010	Y280B	Y280B	TRUE
EPI_ISL_97570	A/chicken/Guizhou/E29/2010	Y280B	Y280B	TRUE
EPI_ISL_97577	A/chicken/Guizhou/E3/2010	Y280B	Y280B	TRUE
EPI_ISL_97575	A/chicken/Guizhou/E9/2010	Y280B	Y280B	TRUE
EPI_ISL_99616	A/chicken/Guizhou/XK04/2011	Y280B	Y280B	TRUE
EPI_ISL_98006	A/chicken/Hainan/A13/2011	Y280B	Y280B	TRUE
EPI_ISL_98005	A/chicken/Hainan/A26/2011	Y280B	Y280B	TRUE
EPI_ISL_98004	A/chicken/Hainan/A4/2011	Y280B	Y280B	TRUE
EPI_ISL_97992	A/chicken/Hainan/J3/2011	Y280B	Y280B	TRUE
EPI_ISL_97988	A/chicken/Hainan/J6/2011	Y280B	Y280B	TRUE
EPI_ISL_89649	A/chicken/Hainan/Q4/2010	Y280B	Y280B	TRUE
EPI_ISL_84330	A/chicken/Hebei/0329/2007	Y280B	Y280B	TRUE
EPI_ISL_84329	A/chicken/Hebei/0617/2007	Y280B	Y280B	TRUE
EPI_ISL_24723	A/chicken/Hebei/2/2002	Y280B	Y280B	TRUE
EPI_ISL_8503	A/chicken/Hebei/31/00	Y280B	Y280B	TRUE
EPI_ISL_2235	A/chicken/Hebei/4/98	Y280B	Y280B	TRUE
EPI_ISL_13995	A/chicken/Hebei/B1/2001	Y280B	Y280B	TRUE
EPI_ISL_84327	A/chicken/Hebei/C6/2007	Y280B	Y280B	TRUE
EPI_ISL_84326	A/chicken/Hebei/LC/2008	Y280B	Y280B	TRUE
EPI_ISL_74001	A/chicken/Heibei/8/2003	Y280B	Y280B	TRUE
EPI_ISL_8505	A/chicken/Heilongjiang/48/01	Y280B	Y280B	TRUE
EPI_ISL_24709	A/chicken/Henan/1/2001	Y280B	Y280B	TRUE
EPI_ISL_67372	A/chicken/Henan/1/2003	Y280B	Y280B	TRUE
EPI_ISL_8507	A/chicken/Henan/43/02	Y280B	Y280B	TRUE
EPI_ISL_24710	A/chicken/Henan/5/2001	Y280B	Y280B	TRUE
EPI_ISL_8508	A/chicken/Henan/5/98	Y280B	Y280B	TRUE
EPI_ISL_2237	A/chicken/Henan/62/00	Y280B	Y280B	TRUE
EPI_ISL_24711	A/chicken/Henan/622/2006	Y280B	Y280B	TRUE
EPI_ISL_97583	A/chicken/Henan/A16/2010	Y280B	Y280B	TRUE
EPI_ISL_12623	A/chicken/Henan/A3/1998	Y280B	Y280B	TRUE
EPI_ISL_97984	A/chicken/Henan/B19/2011	Y280B	Y280B	TRUE
EPI_ISL_97983	A/chicken/Henan/B6/2011	Y280B	Y280B	TRUE
EPI_ISL_97700	A/chicken/Henan/D17/2011	Y280B	Y280B	TRUE
EPI_ISL_97981	A/chicken/Henan/D21/2011	Y280B	Y280B	TRUE
EPI_ISL_97633	A/chicken/Henan/E1/2010	Y280B	Y280B	TRUE
EPI_ISL_97979	A/chicken/Henan/E1/2011	Y280B	Y280B	TRUE
EPI_ISL_97978	A/chicken/Henan/E10/2011	Y280B	Y280B	TRUE
EPI_ISL_97973	A/chicken/Henan/E18/2011	Y280B	Y280B	TRUE
EPI_ISL_97632	A/chicken/Henan/E2/2010	Y280B	Y280B	TRUE
EPI_ISL_97972	A/chicken/Henan/E2/2011	Y280B	Y280B	TRUE
EPI_ISL_97971	A/chicken/Henan/E21/2011	Y280B	Y280B	TRUE
EPI_ISL_97970	A/chicken/Henan/E24/2011	Y280B	Y280B	TRUE
EPI_ISL_97630	A/chicken/Henan/F14/2010	Y280B	Y280B	TRUE
EPI_ISL_97958	A/chicken/Henan/F16/2011	Y280B	Y280B	TRUE
EPI_ISL_97629	A/chicken/Henan/F17/2010	Y280B	Y280B	TRUE
EPI_ISL_97955	A/chicken/Henan/F21/2011	Y280B	Y280B	TRUE
EPI_ISL_97625	A/chicken/Henan/G1/2010	Y280B	Y280B	TRUE
EPI_ISL_97619	A/chicken/Henan/G11/2010	Y280B	Y280B	TRUE
EPI_ISL_97617	A/chicken/Henan/G15/2010	Y280B	Y280B	TRUE
EPI_ISL_97942	A/chicken/Henan/G15/2011	Y280B	Y280B	TRUE
EPI_ISL_97941	A/chicken/Henan/G17/2011	Y280B	Y280B	TRUE
EPI_ISL_97615	A/chicken/Henan/G19/2010	Y280B	Y280B	TRUE
EPI_ISL_97614	A/chicken/Henan/G20/2010	Y280B	Y280B	TRUE
EPI_ISL_97922	A/chicken/Henan/H15/2011	Y280B	Y280B	TRUE
EPI_ISL_97919	A/chicken/Henan/H22/2011	Y280B	Y280B	TRUE
EPI_ISL_97917	A/chicken/Henan/H24/2011	Y280B	Y280B	TRUE
EPI_ISL_97915	A/chicken/Henan/H26/2011	Y280B	Y280B	TRUE
EPI_ISL_97914	A/chicken/Henan/H27/2011	Y280B	Y280B	TRUE
EPI_ISL_97912	A/chicken/Henan/H29/2011	Y280B	Y280B	TRUE
EPI_ISL_97910	A/chicken/Henan/H5/2011	Y280B	Y280B	TRUE
EPI_ISL_97909	A/chicken/Henan/H6/2011	Y280B	Y280B	TRUE
EPI_ISL_97907	A/chicken/Henan/I23/2011	Y280B	Y280B	TRUE
EPI_ISL_97905	A/chicken/Henan/I27/2011	Y280B	Y280B	TRUE
EPI_ISL_97901	A/chicken/Henan/J14/2011	Y280B	Y280B	TRUE
EPI_ISL_97898	A/chicken/Henan/J22/2011	Y280B	Y280B	TRUE
EPI_ISL_97886	A/chicken/Henan/K19/2011	Y280B	Y280B	TRUE
EPI_ISL_3216	A/chicken/Hong_Kong/WF2/99	Y280B	Y280B	TRUE
EPI_ISL_4452	A/chicken/HongKong/AP45/03	Y280B	Y280B	TRUE
EPI_ISL_4453	A/chicken/HongKong/BD90/03	Y280B	Y280B	TRUE
EPI_ISL_4451	A/chicken/HongKong/CSW153/03	Y280B	Y280B	TRUE
EPI_ISL_4454	A/chicken/HongKong/CSW291/03	Y280B	Y280B	TRUE
EPI_ISL_4455	A/chicken/HongKong/CSW304/03	Y280B	Y280B	TRUE
EPI_ISL_4458	A/chicken/HongKong/NT142/03	Y280B	Y280B	TRUE
EPI_ISL_4467	A/chicken/HongKong/NT366/03	Y280B	Y280B	TRUE
EPI_ISL_4459	A/chicken/HongKong/SF1/03	Y280B	Y280B	TRUE
EPI_ISL_4468	A/chicken/HongKong/SSP418/03	Y280B	Y280B	TRUE
EPI_ISL_4461	A/chicken/HongKong/TP38/03	Y280B	Y280B	TRUE
EPI_ISL_4466	A/chicken/HongKong/WF120/03	Y280B	Y280B	TRUE
EPI_ISL_4469	A/chicken/HongKong/YU427/03	Y280B	Y280B	TRUE
EPI_ISL_69859	A/chicken/Hubei	Y280B	Y280B	TRUE
EPI_ISL_96868	A/chicken/Hubei/01/1999	Y280B	Y280B	TRUE
EPI_ISL_97682	A/chicken/Hubei/558/2011	Y280B	Y280B	TRUE
EPI_ISL_97680	A/chicken/Hubei/581/2011	Y280B	Y280B	TRUE
EPI_ISL_97679	A/chicken/Hubei/661/2011	Y280B	Y280B	TRUE
EPI_ISL_97548	A/chicken/Hubei/A28/2010	Y280B	Y280B	TRUE
EPI_ISL_97546	A/chicken/Hubei/A30/2010	Y280B	Y280B	TRUE
EPI_ISL_97552	A/chicken/Hubei/A4/2010	Y280B	Y280B	TRUE
EPI_ISL_97543	A/chicken/Hubei/D17/2010	Y280B	Y280B	TRUE
EPI_ISL_69396	A/chicken/Hubei/E13/2008	Y280B	Y280B	TRUE
EPI_ISL_97536	A/chicken/Hubei/E13/2010	Y280B	Y280B	TRUE
EPI_ISL_97534	A/chicken/Hubei/E16/2010	Y280B	Y280B	TRUE
EPI_ISL_97533	A/chicken/Hubei/E17/2010	Y280B	Y280B	TRUE
EPI_ISL_97532	A/chicken/Hubei/E18/2010	Y280B	Y280B	TRUE
EPI_ISL_97528	A/chicken/Hubei/E23/2010	Y280B	Y280B	TRUE
EPI_ISL_97539	A/chicken/Hubei/E8/2010	Y280B	Y280B	TRUE
EPI_ISL_69395	A/chicken/Hubei/E9/2008	Y280B	Y280B	TRUE
EPI_ISL_97538	A/chicken/Hubei/E9/2010	Y280B	Y280B	TRUE
EPI_ISL_97518	A/chicken/Hubei/G19/2010	Y280B	Y280B	TRUE
EPI_ISL_97525	A/chicken/Hubei/G2/2010	Y280B	Y280B	TRUE
EPI_ISL_97517	A/chicken/Hubei/G21/2010	Y280B	Y280B	TRUE
EPI_ISL_97524	A/chicken/Hubei/G4/2010	Y280B	Y280B	TRUE
EPI_ISL_97523	A/chicken/Hubei/G5/2010	Y280B	Y280B	TRUE
EPI_ISL_97522	A/chicken/Hubei/G6/2010	Y280B	Y280B	TRUE
EPI_ISL_97521	A/chicken/Hubei/G9/2010	Y280B	Y280B	TRUE
EPI_ISL_89723	A/chicken/Hubei/GYC/2011	Y280B	Y280B	TRUE
EPI_ISL_69398	A/chicken/Hubei/HE27/2008	Y280B	Y280B	TRUE
EPI_ISL_89730	A/chicken/Hubei/HWC/2011	Y280B	Y280B	TRUE
EPI_ISL_99617	A/chicken/Hubei/LLM03/2011	Y280B	Y280B	TRUE
EPI_ISL_89729	A/chicken/Hubei/ZWC/2011	Y280B	Y280B	TRUE
EPI_ISL_7374	A/chicken/Hunan/2903/2005	Y280B	Y280B	TRUE
EPI_ISL_7378	A/chicken/Hunan/4444/2005	Y280B	Y280B	TRUE
EPI_ISL_7380	A/chicken/Hunan/5700/2005	Y280B	Y280B	TRUE
EPI_ISL_7381	A/chicken/Hunan/6108/2005	Y280B	Y280B	TRUE
EPI_ISL_29150	A/chicken/Hunan/HA17/2007	Y280B	Y280B	TRUE
EPI_ISL_29149	A/chicken/Hunan/HB25/2007	Y280B	Y280B	TRUE
EPI_ISL_29148	A/chicken/Hunan/HB29/2007	Y280B	Y280B	TRUE
EPI_ISL_29166	A/chicken/Hunan/HB5/2007	Y280B	Y280B	TRUE
EPI_ISL_29167	A/chicken/Hunan/HE5/2007	Y280B	Y280B	TRUE
EPI_ISL_29147	A/chicken/Hunan/HG29/2007	Y280B	Y280B	TRUE
EPI_ISL_73326	A/chicken/Jiande/01/2009	Y280B	Y280B	TRUE
EPI_ISL_8510	A/chicken/Jiangsu/1/00	Y280B	Y280B	TRUE
EPI_ISL_97566	A/chicken/Jiangsu/A13/2010	Y280B	Y280B	TRUE
EPI_ISL_97565	A/chicken/Jiangsu/A20/2010	Y280B	Y280B	TRUE
EPI_ISL_97569	A/chicken/Jiangsu/A7/2010	Y280B	Y280B	TRUE
EPI_ISL_97568	A/chicken/Jiangsu/A9/2010	Y280B	Y280B	TRUE
EPI_ISL_97880	A/chicken/Jiangsu/B12/2011	Y280B	Y280B	TRUE
EPI_ISL_97871	A/chicken/Jiangsu/B25/2011	Y280B	Y280B	TRUE
EPI_ISL_97870	A/chicken/Jiangsu/B27/2011	Y280B	Y280B	TRUE
EPI_ISL_97869	A/chicken/Jiangsu/B3/2011	Y280B	Y280B	TRUE
EPI_ISL_97867	A/chicken/Jiangsu/B4/2011	Y280B	Y280B	TRUE
EPI_ISL_97862	A/chicken/Jiangsu/D10/2011	Y280B	Y280B	TRUE
EPI_ISL_97861	A/chicken/Jiangsu/D8/2011	Y280B	Y280B	TRUE
EPI_ISL_69397	A/chicken/Jiangsu/E26/2007	Y280B	Y280B	TRUE
EPI_ISL_99618	A/chicken/Jiangsu/FQD03/2011	Y280B	Y280B	TRUE
EPI_ISL_97612	A/chicken/Jiangsu/G12/2010	Y280B	Y280B	TRUE
EPI_ISL_97561	A/chicken/Jiangsu/H10/2010	Y280B	Y280B	TRUE
EPI_ISL_97860	A/chicken/Jiangsu/H10/2011	Y280B	Y280B	TRUE
EPI_ISL_97560	A/chicken/Jiangsu/H11/2010	Y280B	Y280B	TRUE
EPI_ISL_97859	A/chicken/Jiangsu/H13/2011	Y280B	Y280B	TRUE
EPI_ISL_97858	A/chicken/Jiangsu/H2/2011	Y280B	Y280B	TRUE
EPI_ISL_97557	A/chicken/Jiangsu/H25/2010	Y280B	Y280B	TRUE
EPI_ISL_97857	A/chicken/Jiangsu/H27/2011	Y280B	Y280B	TRUE
EPI_ISL_97856	A/chicken/Jiangsu/H3/2011	Y280B	Y280B	TRUE
EPI_ISL_97564	A/chicken/Jiangsu/H4/2010	Y280B	Y280B	TRUE
EPI_ISL_97853	A/chicken/Jiangsu/I2/2011	Y280B	Y280B	TRUE
EPI_ISL_97852	A/chicken/Jiangsu/I20/2011	Y280B	Y280B	TRUE
EPI_ISL_89740	A/chicken/Jiangsu/LWC/2011	Y280B	Y280B	TRUE
EPI_ISL_89650	A/chicken/Jiangsu/Q3/2010	Y280B	Y280B	TRUE
EPI_ISL_89647	A/chicken/Jiangsu/Q7/2010	Y280B	Y280B	TRUE
EPI_ISL_89646	A/chicken/Jiangsu/U1/2010	Y280B	Y280B	TRUE
EPI_ISL_89645	A/chicken/Jiangsu/U2/2010	Y280B	Y280B	TRUE
EPI_ISL_89644	A/chicken/Jiangsu/U3/2010	Y280B	Y280B	TRUE
EPI_ISL_89734	A/chicken/Jiangsu/WXY/2011	Y280B	Y280B	TRUE
EPI_ISL_89727	A/chicken/Jiangsu/ZHM/2011	Y280B	Y280B	TRUE
EPI_ISL_84325	A/chicken/Jiangxi/12/2007	Y280B	Y280B	TRUE
EPI_ISL_8509	A/chicken/Jilin/53/01	Y280B	Y280B	TRUE
EPI_ISL_2159	A/chicken/Liaoning/1/00	Y280B	Y280B	TRUE
EPI_ISL_2160	A/chicken/Liaoning/2/00	Y280B	Y280B	TRUE
EPI_ISL_63461	A/chicken/Liaoning/21/7/2007	Y280B	Y280B	TRUE
EPI_ISL_29160	A/chicken/Liaoning/3/2007	Y280B	Y280B	TRUE
EPI_ISL_63462	A/chicken/Liaoning/41/17/2007	Y280B	Y280B	TRUE
EPI_ISL_84546	A/chicken/Lincang/711/2008	Y280B	Y280B	TRUE
EPI_ISL_97693	A/chicken/Ningxia/101/2011	Y280B	Y280B	TRUE
EPI_ISL_97684	A/chicken/Ningxia/189/2011	Y280B	Y280B	TRUE
EPI_ISL_97698	A/chicken/Ningxia/29/2011	Y280B	Y280B	TRUE
EPI_ISL_97696	A/chicken/Ningxia/31/2011	Y280B	Y280B	TRUE
EPI_ISL_8512	A/chicken/Ningxia/4/99	Y280B	Y280B	TRUE
EPI_ISL_97846	A/chicken/Ningxia/A15/2011	Y280B	Y280B	TRUE
EPI_ISL_97845	A/chicken/Ningxia/A2/2011	Y280B	Y280B	TRUE
EPI_ISL_97844	A/chicken/Ningxia/A21/2011	Y280B	Y280B	TRUE
EPI_ISL_342	A/chicken/Osaka/aq19/2001	Y280B	Y280B	TRUE
EPI_ISL_336	A/chicken/Osaka/aq58/2001	Y280B	Y280B	TRUE
EPI_ISL_84538	A/chicken/Puer/411/2009	Y280B	Y280B	TRUE
EPI_ISL_74004	A/chicken/Sandong/Li/2008	Y280B	Y280B	TRUE
EPI_ISL_68602	A/chicken/Shandong/1/1998	Y280B	Y280B	TRUE
EPI_ISL_67390	A/chicken/Shandong/1/2003	Y280B	Y280B	TRUE
EPI_ISL_84324	A/chicken/Shandong/1/2006	Y280B	Y280B	TRUE
EPI_ISL_2161	A/chicken/Shandong/1/98	Y280B	Y280B	TRUE
EPI_ISL_84323	A/chicken/Shandong/12/2008	Y280B	Y280B	TRUE
EPI_ISL_84321	A/chicken/Shandong/1231/2008	Y280B	Y280B	TRUE
EPI_ISL_2162	A/chicken/Shandong/2/99	Y280B	Y280B	TRUE
EPI_ISL_84322	A/chicken/Shandong/22/2008	Y280B	Y280B	TRUE
EPI_ISL_80509	A/chicken/Shandong/A1/2009	Y280B	Y280B	TRUE
EPI_ISL_97249	A/chicken/Shandong/B/2009	Y280B	Y280B	TRUE
EPI_ISL_77227	A/chicken/Shandong/BD/2009	Y280B	Y280B	TRUE
EPI_ISL_82193	A/chicken/Shandong/C/2009	Y280B	Y280B	TRUE
EPI_ISL_24731	A/chicken/Shandong/cy1127/2007	Y280B	Y280B	TRUE
EPI_ISL_97248	A/chicken/Shandong/E/2010	Y280B	Y280B	TRUE
EPI_ISL_77200	A/chicken/Shandong/FX/2009	Y280B	Y280B	TRUE
EPI_ISL_77198	A/chicken/Shandong/HY/2009	Y280B	Y280B	TRUE
EPI_ISL_77230	A/chicken/Shandong/JN/1999	Y280B	Y280B	TRUE
EPI_ISL_97247	A/chicken/Shandong/K/2010	Y280B	Y280B	TRUE
EPI_ISL_97246	A/chicken/Shandong/L/2010	Y280B	Y280B	TRUE
EPI_ISL_24732	A/chicken/Shandong/lc1124/2007	Y280B	Y280B	TRUE
EPI_ISL_77231	A/chicken/Shandong/LW/1999	Y280B	Y280B	TRUE
EPI_ISL_24737	A/chicken/Shandong/lx1023/2007	Y280B	Y280B	TRUE
EPI_ISL_24738	A/chicken/Shandong/lx1027/2007	Y280B	Y280B	TRUE
EPI_ISL_24740	A/chicken/Shandong/lx1129/2007	Y280B	Y280B	TRUE
EPI_ISL_84320	A/chicken/Shandong/LY/2006	Y280B	Y280B	TRUE
EPI_ISL_77232	A/chicken/Shandong/LY/2008	Y280B	Y280B	TRUE
EPI_ISL_97245	A/chicken/Shandong/M/2010	Y280B	Y280B	TRUE
EPI_ISL_24741	A/chicken/Shandong/mp1224/2007	Y280B	Y280B	TRUE
EPI_ISL_97244	A/chicken/Shandong/N/2010	Y280B	Y280B	TRUE
EPI_ISL_77197	A/chicken/Shandong/PD/2009	Y280B	Y280B	TRUE
EPI_ISL_24920	A/chicken/Shandong/qd04/2007	Y280B	Y280B	TRUE
EPI_ISL_77233	A/chicken/Shandong/S2/2005	Y280B	Y280B	TRUE
EPI_ISL_77201	A/chicken/Shandong/SG1/2009	Y280B	Y280B	TRUE
EPI_ISL_77202	A/chicken/Shandong/SG2/2009	Y280B	Y280B	TRUE
EPI_ISL_97602	A/chicken/Shandong/TH9/2010	Y280B	Y280B	TRUE
EPI_ISL_97830	A/chicken/Shandong/WE11/2011	Y280B	Y280B	TRUE
EPI_ISL_97823	A/chicken/Shandong/WE26/2011	Y280B	Y280B	TRUE
EPI_ISL_97812	A/chicken/Shandong/WG10/2011	Y280B	Y280B	TRUE
EPI_ISL_77199	A/chicken/Shandong/WL/2009	Y280B	Y280B	TRUE
EPI_ISL_24742	A/chicken/Shandong/yt1105/2007	Y280B	Y280B	TRUE
EPI_ISL_24730	A/chicken/Shandong/zc820/2006	Y280B	Y280B	TRUE
EPI_ISL_7480	A/chicken/Shantou/1126/2001	Y280B	Y280B	TRUE
EPI_ISL_7313	A/chicken/Shantou/1138/2004	Y280B	Y280B	TRUE
EPI_ISL_7481	A/chicken/Shantou/1205/2001	Y280B	Y280B	TRUE
EPI_ISL_7300	A/chicken/Shantou/1404/2003	Y280B	Y280B	TRUE
EPI_ISL_7337	A/chicken/Shantou/14907/2005	Y280B	Y280B	TRUE
EPI_ISL_7476	A/chicken/Shantou/1579/2000	Y280B	Y280B	TRUE
EPI_ISL_7483	A/chicken/Shantou/1608/2001	Y280B	Y280B	TRUE
EPI_ISL_7484	A/chicken/Shantou/1610/2001	Y280B	Y280B	TRUE
EPI_ISL_7301	A/chicken/Shantou/1689/2003	Y280B	Y280B	TRUE
EPI_ISL_7338	A/chicken/Shantou/17139/2005	Y280B	Y280B	TRUE
EPI_ISL_7485	A/chicken/Shantou/1890/2001	Y280B	Y280B	TRUE
EPI_ISL_7315	A/chicken/Shantou/1926/2004	Y280B	Y280B	TRUE
EPI_ISL_7339	A/chicken/Shantou/19465/2005	Y280B	Y280B	TRUE
EPI_ISL_7340	A/chicken/Shantou/20817/2005	Y280B	Y280B	TRUE
EPI_ISL_7479	A/chicken/Shantou/2098/2000	Y280B	Y280B	TRUE
EPI_ISL_7473	A/chicken/Shantou/212/2000	Y280B	Y280B	TRUE
EPI_ISL_7293	A/chicken/Shantou/2204/2002	Y280B	Y280B	TRUE
EPI_ISL_7341	A/chicken/Shantou/22054/2005	Y280B	Y280B	TRUE
EPI_ISL_7342	A/chicken/Shantou/22504/2005	Y280B	Y280B	TRUE
EPI_ISL_7302	A/chicken/Shantou/2686/2003	Y280B	Y280B	TRUE
EPI_ISL_7487	A/chicken/Shantou/2712/2001	Y280B	Y280B	TRUE
EPI_ISL_7318	A/chicken/Shantou/2994/2004	Y280B	Y280B	TRUE
EPI_ISL_7303	A/chicken/Shantou/3040/2003	Y280B	Y280B	TRUE
EPI_ISL_7304	A/chicken/Shantou/3341/2003	Y280B	Y280B	TRUE
EPI_ISL_7489	A/chicken/Shantou/3778/2001	Y280B	Y280B	TRUE
EPI_ISL_7305	A/chicken/Shantou/4101/2003	Y280B	Y280B	TRUE
EPI_ISL_7294	A/chicken/Shantou/4144/2002	Y280B	Y280B	TRUE
EPI_ISL_7490	A/chicken/Shantou/4208/2001	Y280B	Y280B	TRUE
EPI_ISL_7295	A/chicken/Shantou/4342/2002	Y280B	Y280B	TRUE
EPI_ISL_7291	A/chicken/Shantou/439/2002	Y280B	Y280B	TRUE
EPI_ISL_7296	A/chicken/Shantou/4608/2002	Y280B	Y280B	TRUE
EPI_ISL_7319	A/chicken/Shantou/4726/2004	Y280B	Y280B	TRUE
EPI_ISL_7491	A/chicken/Shantou/5028/2001	Y280B	Y280B	TRUE
EPI_ISL_7292	A/chicken/Shantou/526/2002	Y280B	Y280B	TRUE
EPI_ISL_7492	A/chicken/Shantou/5319/2001	Y280B	Y280B	TRUE
EPI_ISL_7328	A/chicken/Shantou/55/2005	Y280B	Y280B	TRUE
EPI_ISL_7320	A/chicken/Shantou/5630/2004	Y280B	Y280B	TRUE
EPI_ISL_7289	A/chicken/Shantou/5714/2001	Y280B	Y280B	TRUE
EPI_ISL_7323	A/chicken/Shantou/6319/2004	Y280B	Y280B	TRUE
EPI_ISL_7297	A/chicken/Shantou/69/2003	Y280B	Y280B	TRUE
EPI_ISL_7325	A/chicken/Shantou/6911/2004	Y280B	Y280B	TRUE
EPI_ISL_7327	A/chicken/Shantou/7920/2004	Y280B	Y280B	TRUE
EPI_ISL_7298	A/chicken/Shantou/944/2003	Y280B	Y280B	TRUE
EPI_ISL_7309	A/chicken/Shantou/99/2004	Y280B	Y280B	TRUE
EPI_ISL_7336	A/chicken/Shantou/9909/2005	Y280B	Y280B	TRUE
EPI_ISL_97798	A/chicken/Shanxi/B3/2011	Y280B	Y280B	TRUE
EPI_ISL_97796	A/chicken/Shanxi/D24/2011	Y280B	Y280B	TRUE
EPI_ISL_97793	A/chicken/Shanxi/D4/2011	Y280B	Y280B	TRUE
EPI_ISL_97792	A/chicken/Shanxi/E30/2011	Y280B	Y280B	TRUE
EPI_ISL_97771	A/chicken/Shanxi/J4/2011	Y280B	Y280B	TRUE
EPI_ISL_97769	A/chicken/Shanxi/K1/2011	Y280B	Y280B	TRUE
EPI_ISL_97767	A/chicken/Shanxi/K16/2011	Y280B	Y280B	TRUE
EPI_ISL_24744	A/chicken/Sichuan/bs1210/2007	Y280B	Y280B	TRUE
EPI_ISL_69402	A/chicken/Sichuan/G2/2009	Y280B	Y280B	TRUE
EPI_ISL_69403	A/chicken/Sichuan/G3/2009	Y280B	Y280B	TRUE
EPI_ISL_69404	A/chicken/Sichuan/G4/2009	Y280B	Y280B	TRUE
EPI_ISL_69406	A/chicken/Sichuan/G6/2009	Y280B	Y280B	TRUE
EPI_ISL_89114	A/chicken/Tibet/S1/2009	Y280B	Y280B	TRUE
EPI_ISL_89115	A/chicken/Tibet/S4/2009	Y280B	Y280B	TRUE
EPI_ISL_84541	A/chicken/Wenshan/412/2009	Y280B	Y280B	TRUE
EPI_ISL_29145	A/chicken/Xinjiang/XJ154/2007	Y280B	Y280B	TRUE
EPI_ISL_29146	A/chicken/Xinjiang/XJ75/2007	Y280B	Y280B	TRUE
EPI_ISL_77234	A/chicken/Yangzhou/YZ/2000	Y280B	Y280B	TRUE
EPI_ISL_13563	A/chicken/YN/BanNa2/2006	Y280B	Y280B	TRUE
EPI_ISL_341	A/chicken/Yokohama/aq120/2001	Y280B	Y280B	TRUE
EPI_ISL_340	A/chicken/Yokohama/aq135/2001	Y280B	Y280B	TRUE
EPI_ISL_343	A/chicken/Yokohama/aq144/2001	Y280B	Y280B	TRUE
EPI_ISL_334	A/chicken/Yokohama/aq55/2001	Y280B	Y280B	TRUE
EPI_ISL_13760	A/chicken/Yunnan/BaoShan3/2007	Y280B	Y280B	TRUE
EPI_ISL_13761	A/chicken/Yunnan/Chuxiong1/2007	Y280B	Y280B	TRUE
EPI_ISL_13763	A/chicken/Yunnan/Chuxiong3/2007	Y280B	Y280B	TRUE
EPI_ISL_13764	A/chicken/Yunnan/Dehong1/2007	Y280B	Y280B	TRUE
EPI_ISL_64342	A/chicken/Yunnan/Diqing/2006	Y280B	Y280B	TRUE
EPI_ISL_63468	A/chicken/Yunnan/Kunming/2007	Y280B	Y280B	TRUE
EPI_ISL_19170	A/chicken/Yunnan/qujing09/07	Y280B	Y280B	TRUE
EPI_ISL_13769	A/chicken/Yunnan/Simao3/2007	Y280B	Y280B	TRUE
EPI_ISL_63469	A/chicken/Yunnan/Wenshan/2007	Y280B	Y280B	TRUE
EPI_ISL_29143	A/chicken/Yunnan/YC12/2007	Y280B	Y280B	TRUE
EPI_ISL_13771	A/chicken/Yunnan/Yuxi2/2007	Y280B	Y280B	TRUE
EPI_ISL_63470	A/chicken/Yunnan/Zhaotong/2007	Y280B	Y280B	TRUE
EPI_ISL_84548	A/chicken/Yunnanbn/411/2009	Y280B	Y280B	TRUE
EPI_ISL_84545	A/chicken/Yunnandh/101/2008	Y280B	Y280B	TRUE
EPI_ISL_84547	A/chicken/Yunnanws/102/2008	Y280B	Y280B	TRUE
EPI_ISL_69441	A/chicken/Zhejiang/E5/2009	Y280B	Y280B	TRUE
EPI_ISL_89726	A/chicken/Zhejiang/FSQ/2011	Y280B	Y280B	TRUE
EPI_ISL_69437	A/chicken/Zhejiang/HE1/2009	Y280B	Y280B	TRUE
EPI_ISL_69434	A/chicken/Zhejiang/HE3/2009	Y280B	Y280B	TRUE
EPI_ISL_69435	A/chicken/Zhejiang/HE7/2009	Y280B	Y280B	TRUE
EPI_ISL_69433	A/chicken/Zhejiang/HF2/2009	Y280B	Y280B	TRUE
EPI_ISL_69432	A/chicken/Zhejiang/HF3/2009	Y280B	Y280B	TRUE
EPI_ISL_69438	A/chicken/Zhejiang/HF4/2009	Y280B	Y280B	TRUE
EPI_ISL_69436	A/chicken/Zhejiang/HF5/2009	Y280B	Y280B	TRUE
EPI_ISL_63471	A/chicken/Zhejiang/HJ/2007	Y280B	Y280B	TRUE
EPI_ISL_89738	A/chicken/Zhejiang/LAC/2011	Y280B	Y280B	TRUE
EPI_ISL_89651	A/chicken/Zhejiang/Q1D4/2010	Y280B	Y280B	TRUE
EPI_ISL_89653	A/chicken/Zhejiang/SJL/2009	Y280B	Y280B	TRUE
EPI_ISL_89711	A/chicken/Zhejiang/SYX/2010	Y280B	Y280B	TRUE
EPI_ISL_89737	A/chicken/Zhejiang/ZLB/2011	Y280B	Y280B	TRUE
EPI_ISL_7426	A/chukkar/Shantou/4635/2003	Y280B	Y280B	TRUE
EPI_ISL_7445	A/chukkar/Shantou/5866/2004	Y280B	Y280B	TRUE
EPI_ISL_9789	A/Ck/HK/NT142/2003	Y280B	Y280B	TRUE
EPI_ISL_9790	A/Ck/HK/WF126/2003	Y280B	Y280B	TRUE
EPI_ISL_9792	A/Ck/HK/YU463/2003	Y280B	Y280B	TRUE
EPI_ISL_9793	A/Ck/HK/YU577/2003	Y280B	Y280B	TRUE
EPI_ISL_97764	A/duck/Anhui/B13/2011	Y280B	Y280B	TRUE
EPI_ISL_97648	A/duck/Anhui/B24/2010	Y280B	Y280B	TRUE
EPI_ISL_84318	A/duck/Beijing/31/2005	Y280B	Y280B	TRUE
EPI_ISL_84334	A/duck/Beijing/MG0617/2005	Y280B	Y280B	TRUE
EPI_ISL_69873	A/duck/China	Y280B	Y280B	TRUE
EPI_ISL_97760	A/duck/Chongqing/D23/2011	Y280B	Y280B	TRUE
EPI_ISL_83491	A/duck/Fujian/FQ107/2007	Y280B	Y280B	TRUE
EPI_ISL_100152	A/duck/Fujian/FQ2/2007	Y280B	Y280B	TRUE
EPI_ISL_69400	A/duck/Fujian/T14/2007	Y280B	Y280B	TRUE
EPI_ISL_69399	A/duck/Fujian/T7/2007	Y280B	Y280B	TRUE
EPI_ISL_69420	A/duck/Guangdong/810/2009	Y280B	Y280B	TRUE
EPI_ISL_97608	A/duck/Guangdong/G20/2010	Y280B	Y280B	TRUE
EPI_ISL_97604	A/duck/Guangdong/G24/2010	Y280B	Y280B	TRUE
EPI_ISL_84539	A/duck/Honghe/111/2009	Y280B	Y280B	TRUE
EPI_ISL_97526	A/duck/Hubei/F1/2010	Y280B	Y280B	TRUE
EPI_ISL_10144	A/duck/Hubei/W1/2004	Y280B	Y280B	TRUE
EPI_ISL_8922	A/duck/Nanchang/4-361/2001	Y280B	Y280B	TRUE
EPI_ISL_7406	A/duck/Shantou/12560/2005	Y280B	Y280B	TRUE
EPI_ISL_2299	A/duck/Shantou/2088/01	Y280B	Y280B	TRUE
EPI_ISL_2297	A/duck/Shantou/2143/00	Y280B	Y280B	TRUE
EPI_ISL_7397	A/duck/Shantou/3460/2003	Y280B	Y280B	TRUE
EPI_ISL_7390	A/duck/Shantou/3549/2001	Y280B	Y280B	TRUE
EPI_ISL_7400	A/duck/Shantou/3577/2003	Y280B	Y280B	TRUE
EPI_ISL_7402	A/duck/Shantou/3728/2003	Y280B	Y280B	TRUE
EPI_ISL_7395	A/duck/Shantou/4103/2002	Y280B	Y280B	TRUE
EPI_ISL_7396	A/duck/Shantou/4359/2002	Y280B	Y280B	TRUE
EPI_ISL_7404	A/duck/Shantou/515/2004	Y280B	Y280B	TRUE
EPI_ISL_7391	A/duck/Shantou/5401/2001	Y280B	Y280B	TRUE
EPI_ISL_7392	A/duck/Shantou/5459/2001	Y280B	Y280B	TRUE
EPI_ISL_7393	A/duck/Shantou/5753/2001	Y280B	Y280B	TRUE
EPI_ISL_89133	A/duck/Tibet/S2/2009	Y280B	Y280B	TRUE
EPI_ISL_34047	A/duck/Zhejiang/3/2002	Y280B	Y280B	TRUE
EPI_ISL_70188	A/environment/Hunan/1-23/2007	Y280B	Y280B	TRUE
EPI_ISL_70190	A/environment/Hunan/1-81/2007	Y280B	Y280B	TRUE
EPI_ISL_70191	A/environment/Hunan/2-84/2007	Y280B	Y280B	TRUE
EPI_ISL_70192	A/environment/Hunan/5-38/2007	Y280B	Y280B	TRUE
EPI_ISL_70193	A/feces/Hunan/2-28/2007	Y280B	Y280B	TRUE
EPI_ISL_70194	A/feces/Hunan/3-91/2007	Y280B	Y280B	TRUE
EPI_ISL_9796	A/Gf/HK/NT101/2003	Y280B	Y280B	TRUE
EPI_ISL_97759	A/goose/Jilin/K5/2011	Y280B	Y280B	TRUE
EPI_ISL_19166	A/goose/Yunnan/chuxiong07/07	Y280B	Y280B	TRUE
EPI_ISL_7398	A/Guinea_fowl/Shantou/1677/2000	Y280B	Y280B	TRUE
EPI_ISL_7444	A/Guinea_fowl/Shantou/5852/2004	Y280B	Y280B	TRUE
EPI_ISL_4457	A/guineafowl/HongKong/NT101/03	Y280B	Y280B	TRUE
EPI_ISL_69735	A/Hong_Kong/3239/2008	Y280B	Y280B	TRUE
EPI_ISL_7413	A/partridge/Shantou/2803/2003	Y280B	Y280B	TRUE
EPI_ISL_7414	A/partridge/Shantou/3487/2003	Y280B	Y280B	TRUE
EPI_ISL_7299	A/partridge/Shantou/3720/2001	Y280B	Y280B	TRUE
EPI_ISL_7419	A/partridge/Shantou/3987/2003	Y280B	Y280B	TRUE
EPI_ISL_7408	A/partridge/Shantou/4525/2002	Y280B	Y280B	TRUE
EPI_ISL_7332	A/partridge/Shantou/49/2002	Y280B	Y280B	TRUE
EPI_ISL_7449	A/partridge/Shantou/5692/2000	Y280B	Y280B	TRUE
EPI_ISL_7446	A/partridge/Shantou/6004/2004	Y280B	Y280B	TRUE
EPI_ISL_7460	A/partridge/Shantou/645/2001	Y280B	Y280B	TRUE
EPI_ISL_7455	A/partridge/Shantou/7075/2004	Y280B	Y280B	TRUE
EPI_ISL_4464	A/pheasant/HongKong/WF54/03	Y280B	Y280B	TRUE
EPI_ISL_7462	A/pheasant/Shantou/111/2005	Y280B	Y280B	TRUE
EPI_ISL_7417	A/pheasant/Shantou/3716/2003	Y280B	Y280B	TRUE
EPI_ISL_7423	A/pheasant/Shantou/4340/2003	Y280B	Y280B	TRUE
EPI_ISL_7431	A/pheasant/Shantou/45/2004	Y280B	Y280B	TRUE
EPI_ISL_7443	A/pheasant/Shantou/5588/2004	Y280B	Y280B	TRUE
EPI_ISL_7452	A/pheasant/Shantou/6607/2004	Y280B	Y280B	TRUE
EPI_ISL_7456	A/pheasant/Shantou/7315/2004	Y280B	Y280B	TRUE
EPI_ISL_3185	A/Pigeon/Nanchang/2-0461/2000	Y280B	Y280B	TRUE
EPI_ISL_2244	A/quail/Shanghai/8/96	Y280B	Y280B	TRUE
EPI_ISL_11278	A/quail/Shantou/1158/2001	Y280B	Y280B	TRUE
EPI_ISL_11273	A/quail/Shantou/1820/2000	Y280B	Y280B	TRUE
EPI_ISL_11332	A/quail/Shantou/2200/2005	Y280B	Y280B	TRUE
EPI_ISL_11309	A/quail/Shantou/2615/2003	Y280B	Y280B	TRUE
EPI_ISL_11312	A/quail/Shantou/3502/2003	Y280B	Y280B	TRUE
EPI_ISL_11315	A/quail/Shantou/3856/2003	Y280B	Y280B	TRUE
EPI_ISL_11316	A/quail/Shantou/4038/2003	Y280B	Y280B	TRUE
EPI_ISL_11331	A/quail/Shantou/493/2005	Y280B	Y280B	TRUE
EPI_ISL_11334	A/quail/Shantou/5011/2005	Y280B	Y280B	TRUE
EPI_ISL_11291	A/quail/Shantou/5675/2001	Y280B	Y280B	TRUE
EPI_ISL_11325	A/quail/Shantou/6046/2004	Y280B	Y280B	TRUE
EPI_ISL_11327	A/quail/Shantou/6794/2004	Y280B	Y280B	TRUE
EPI_ISL_11328	A/quail/Shantou/7397/2004	Y280B	Y280B	TRUE
EPI_ISL_11296	A/quail/Shantou/786/2002	Y280B	Y280B	TRUE
EPI_ISL_11277	A/quail/Shantou/850/2001	Y280B	Y280B	TRUE
EPI_ISL_11335	A/quail/Shantou/8993/2005	Y280B	Y280B	TRUE
EPI_ISL_9791	A/SCk/HK/WF285/2003	Y280B	Y280B	TRUE
EPI_ISL_9794	A/SCk/HK/YU663/2003	Y280B	Y280B	TRUE
EPI_ISL_3044	A/Shaoguan/408/98	Y280B	Y280B	TRUE
EPI_ISL_3045	A/Shaoguan/447/98	Y280B	Y280B	TRUE
EPI_ISL_7330	A/silky_chicken/Shantou/1169/2005	Y280B	Y280B	TRUE
EPI_ISL_7478	A/silky_chicken/Shantou/1818/2000	Y280B	Y280B	TRUE
EPI_ISL_7314	A/silky_chicken/Shantou/1826/2004	Y280B	Y280B	TRUE
EPI_ISL_7331	A/silky_chicken/Shantou/2131/2005	Y280B	Y280B	TRUE
EPI_ISL_7486	A/silky_chicken/Shantou/2619/2001	Y280B	Y280B	TRUE
EPI_ISL_7329	A/silky_chicken/Shantou/459/2005	Y280B	Y280B	TRUE
EPI_ISL_7307	A/silky_chicken/Shantou/4600/2003	Y280B	Y280B	TRUE
EPI_ISL_7326	A/silky_chicken/Shantou/7790/2004	Y280B	Y280B	TRUE
EPI_ISL_70610	A/sparrow/Guangxi/11/2005	Y280B	Y280B	TRUE
EPI_ISL_70611	A/sparrow/Guangxi/31/2006	Y280B	Y280B	TRUE
EPI_ISL_70612	A/sparrow/Guangxi/47/2006	Y280B	Y280B	TRUE
EPI_ISL_65625	A/swine/Guangdong/wxl/2004	Y280B	Y280B	TRUE
EPI_ISL_81611	A/swine/Guangxi/10/2007	Y280B	Y280B	TRUE
EPI_ISL_81608	A/swine/Guangxi/7/2007	Y280B	Y280B	TRUE
EPI_ISL_81609	A/swine/Guangxi/8/2007	Y280B	Y280B	TRUE
EPI_ISL_81610	A/swine/Guangxi/9/2007	Y280B	Y280B	TRUE
EPI_ISL_10593	A/swine/Henan/2/2004	Y280B	Y280B	TRUE
EPI_ISL_10591	A/swine/Henan/8/2004	Y280B	Y280B	TRUE
EPI_ISL_15584	A/swine/Jiangxi/wx2/2004	Y280B	Y280B	TRUE
EPI_ISL_84439	A/swine/Taizhou/5/2008	Y280B	Y280B	TRUE
EPI_ISL_84440	A/swine/Yangzhou/1/2008	Y280B	Y280B	TRUE
EPI_ISL_3192	A/wild_duck/Nanchang/2-0480/2000	Y280B	Y280B	TRUE

## Sheet: HA1-1
Accession	Strain	Annotation	Prediction	Correct
EPI_ISL_128	A/parakeet/Narita/92A/98	G1_Mideast_D	G1_PK519	FALSE
EPI_ISL_1279	A/goose/Minnesota/5733/80	MN5733	HK448	FALSE
EPI_ISL_85214	A/northern_shoveler/Interior_Alaska/8BM3470/2008	MN5733	HK448	FALSE
EPI_ISL_23347	A/turkey/TX/4-1-81/1981	MN5733	HK448	FALSE
EPI_ISL_7377	A/chicken/Hunan/4246/2005	Chk_Bei	Chk_Bei	TRUE
EPI_ISL_7412	A/chukkar/Shantou/1039/2003	Chk_Bei	Chk_Bei	TRUE
EPI_ISL_7437	A/chukkar/Shantou/1447/2004	Chk_Bei	Chk_Bei	TRUE
EPI_ISL_7433	A/chukkar/Shantou/290/2004	Chk_Bei	Chk_Bei	TRUE
EPI_ISL_7418	A/chukkar/Shantou/3980/2003	Chk_Bei	Chk_Bei	TRUE
EPI_ISL_7365	A/chukkar/Shantou/465/2002	Chk_Bei	Chk_Bei	TRUE
EPI_ISL_7376	A/chukkar/Shantou/469/2002	Chk_Bei	Chk_Bei	TRUE
EPI_ISL_2303	A/duck/Shantou/2134/00	Chk_Bei	Chk_Bei	TRUE
EPI_ISL_9788	A/Gf/HK/SSP607/2003	Chk_Bei	Chk_Bei	TRUE
EPI_ISL_7463	A/Guinea_fowl/Shantou/630/2005	Chk_Bei	Chk_Bei	TRUE
EPI_ISL_4465	A/guineafowl/HongKong/NT184/03	Chk_Bei	Chk_Bei	TRUE
EPI_ISL_9786	A/HK/2108/2003	Chk_Bei	Chk_Bei	TRUE
EPI_ISL_7436	A/partridge/Shantou/1405/2004	Chk_Bei	Chk_Bei	TRUE
EPI_ISL_7416	A/partridge/Shantou/1800/2000	Chk_Bei	Chk_Bei	TRUE
EPI_ISL_7469	A/partridge/Shantou/22102/2005	Chk_Bei	Chk_Bei	TRUE
EPI_ISL_7430	A/partridge/Shantou/25/2004	Chk_Bei	Chk_Bei	TRUE
EPI_ISL_7407	A/partridge/Shantou/3811/2002	Chk_Bei	Chk_Bei	TRUE
EPI_ISL_7310	A/partridge/Shantou/4541/2001	Chk_Bei	Chk_Bei	TRUE
EPI_ISL_7321	A/partridge/Shantou/4829/2001	Chk_Bei	Chk_Bei	TRUE
EPI_ISL_7429	A/partridge/Shantou/4889/2003	Chk_Bei	Chk_Bei	TRUE
EPI_ISL_7409	A/pheasant/Shantou/443/2003	Chk_Bei	Chk_Bei	TRUE
EPI_ISL_7428	A/pheasant/Shantou/4709/2003	Chk_Bei	Chk_Bei	TRUE
EPI_ISL_7435	A/pheasant/Shantou/841/2004	Chk_Bei	Chk_Bei	TRUE
EPI_ISL_11297	A/quail/Shantou/1038/2002	Chk_Bei	Chk_Bei	TRUE
EPI_ISL_11272	A/quail/Shantou/1318/2000	Chk_Bei	Chk_Bei	TRUE
EPI_ISL_11282	A/quail/Shantou/1461/2001	Chk_Bei	Chk_Bei	TRUE
EPI_ISL_11338	A/quail/Shantou/15892/2005	Chk_Bei	Chk_Bei	TRUE
EPI_ISL_11306	A/quail/Shantou/1780/2003	Chk_Bei	Chk_Bei	TRUE
EPI_ISL_11307	A/quail/Shantou/1978/2003	Chk_Bei	Chk_Bei	TRUE
EPI_ISL_11340	A/quail/Shantou/20787/2005	Chk_Bei	Chk_Bei	TRUE
EPI_ISL_11269	A/quail/Shantou/243/2000	Chk_Bei	Chk_Bei	TRUE
EPI_ISL_11287	A/quail/Shantou/4179/2001	Chk_Bei	Chk_Bei	TRUE
EPI_ISL_11319	A/quail/Shantou/5/2004	Chk_Bei	Chk_Bei	TRUE
EPI_ISL_77913	A/thick-billed_murre/Alaska/44085-155/2006	DB277	DB277	TRUE
EPI_ISL_7470	A/chukkar/Shantou/22116/2005	G1_Asia	G1_Asia	TRUE
EPI_ISL_3215	A/guinea_fowl/Hong_Kong/WF10/99	G1_Asia	G1_Asia	TRUE
EPI_ISL_7471	A/Guinea_fowl/Shantou/2076/2001	G1_Asia	G1_Asia	TRUE
EPI_ISL_69733	A/Hong_Kong/33982/2009	G1_Asia	G1_Asia	TRUE
EPI_ISL_7288	A/partridge/Shantou/2875/2001	G1_Asia	G1_Asia	TRUE
EPI_ISL_11280	A/quail/Shantou/1242/2001	G1_Asia	G1_Asia	TRUE
EPI_ISL_11271	A/quail/Shantou/1310/2000	G1_Asia	G1_Asia	TRUE
EPI_ISL_11337	A/quail/Shantou/13425/2005	G1_Asia	G1_Asia	TRUE
EPI_ISL_11298	A/quail/Shantou/1551/2002	G1_Asia	G1_Asia	TRUE
EPI_ISL_11283	A/quail/Shantou/1555/2001	G1_Asia	G1_Asia	TRUE
EPI_ISL_11339	A/quail/Shantou/19506/2005	G1_Asia	G1_Asia	TRUE
EPI_ISL_11341	A/quail/Shantou/21605/2005	G1_Asia	G1_Asia	TRUE
EPI_ISL_11275	A/quail/Shantou/2816/2000	G1_Asia	G1_Asia	TRUE
EPI_ISL_11303	A/quail/Shantou/308/2003	G1_Asia	G1_Asia	TRUE
EPI_ISL_11314	A/quail/Shantou/3768/2003	G1_Asia	G1_Asia	TRUE
EPI_ISL_11299	A/quail/Shantou/3851/2002	G1_Asia	G1_Asia	TRUE
EPI_ISL_11317	A/quail/Shantou/4044/2003	G1_Asia	G1_Asia	TRUE
EPI_ISL_11288	A/quail/Shantou/4641/2001	G1_Asia	G1_Asia	TRUE
EPI_ISL_11318	A/quail/Shantou/4850/2003	G1_Asia	G1_Asia	TRUE
EPI_ISL_63454	A/chicken/Israel/114/2007	G1_Mideast_A	G1_Mideast_A	TRUE
EPI_ISL_19621	A/chicken/Israel/178/2006	G1_Mideast_A	G1_Mideast_A	TRUE
EPI_ISL_10376	A/chicken/Israel/1953/2004	G1_Mideast_A	G1_Mideast_A	TRUE
EPI_ISL_19622	A/chicken/Israel/282/2005	G1_Mideast_A	G1_Mideast_A	TRUE
EPI_ISL_30443	A/chicken/Israel/375/2007	G1_Mideast_A	G1_Mideast_A	TRUE
EPI_ISL_19627	A/chicken/Israel/853/2005	G1_Mideast_A	G1_Mideast_A	TRUE
EPI_ISL_85774	A/chicken/Jordan/1436-643/2004	G1_Mideast_A	G1_Mideast_A	TRUE
EPI_ISL_4535	A/ostrich/Eshkol/1436/03	G1_Mideast_A	G1_Mideast_A	TRUE
EPI_ISL_3795	A/turkey/Givat_Haim/965/02	G1_Mideast_A	G1_Mideast_A	TRUE
EPI_ISL_10375	A/turkey/Israel/1209/2003	G1_Mideast_A	G1_Mideast_A	TRUE
EPI_ISL_19623	A/turkey/Israel/425/2005	G1_Mideast_A	G1_Mideast_A	TRUE
EPI_ISL_19628	A/turkey/Israel/884/2005	G1_Mideast_A	G1_Mideast_A	TRUE
EPI_ISL_62976	A/avian/Israel/313/2008	G1_Mideast_B	G1_Mideast_B	TRUE
EPI_ISL_80921	A/avian/Saudi_Arabia/910134/2006	G1_Mideast_B	G1_Mideast_B	TRUE
EPI_ISL_80923	A/avian/Saudi_Arabia/910136/2006	G1_Mideast_B	G1_Mideast_B	TRUE
EPI_ISL_63781	A/chicken/Afghanistan/329-2vir09-AFG-Khost1/2008	G1_Mideast_B	G1_Mideast_B	TRUE
EPI_ISL_63782	A/chicken/Afghanistan/329-3vir09-AFG-Khost2/2008	G1_Mideast_B	G1_Mideast_B	TRUE
EPI_ISL_63784	A/chicken/Afghanistan/329-5vir09-AFG-Khost4/2008	G1_Mideast_B	G1_Mideast_B	TRUE
EPI_ISL_63785	A/chicken/Afghanistan/329-6vir09-AFG-Khost9/2008	G1_Mideast_B	G1_Mideast_B	TRUE
EPI_ISL_63787	A/chicken/Afghanistan/329-8vir09-AFG-Heart7/2009	G1_Mideast_B	G1_Mideast_B	TRUE
EPI_ISL_78703	A/chicken/Chandigarh/2048/2003	G1_Mideast_B	G1_Mideast_B	TRUE
EPI_ISL_85790	A/chicken/Dubai/09vir3771-3/2008	G1_Mideast_B	G1_Mideast_B	TRUE
EPI_ISL_27600	A/chicken/Haryana/2051/2003	G1_Mideast_B	G1_Mideast_B	TRUE
EPI_ISL_97221	A/chicken/India/IVRI-0004/2010	G1_Mideast_B	G1_Mideast_B	TRUE
EPI_ISL_97215	A/chicken/India/IVRI-0011/2011	G1_Mideast_B	G1_Mideast_B	TRUE
EPI_ISL_85794	A/chicken/Iran/10VIR854-4/2009	G1_Mideast_B	G1_Mideast_B	TRUE
EPI_ISL_85791	A/chicken/Iran/10VIR854-5/2008	G1_Mideast_B	G1_Mideast_B	TRUE
EPI_ISL_65650	A/chicken/Iran/133/2004	G1_Mideast_B	G1_Mideast_B	TRUE
EPI_ISL_67377	A/chicken/Iran/320/2003	G1_Mideast_B	G1_Mideast_B	TRUE
EPI_ISL_64312	A/chicken/Iran/68/2006	G1_Mideast_B	G1_Mideast_B	TRUE
EPI_ISL_11185	A/chicken/Iran/B11A/2005	G1_Mideast_B	G1_Mideast_B	TRUE
EPI_ISL_11180	A/chicken/Iran/B308B/2004	G1_Mideast_B	G1_Mideast_B	TRUE
EPI_ISL_11186	A/chicken/Iran/B326/2005	G1_Mideast_B	G1_Mideast_B	TRUE
EPI_ISL_97042	A/chicken/Iran/EBGV-88/2010	G1_Mideast_B	G1_Mideast_B	TRUE
EPI_ISL_10545	A/chicken/Iran/L248/03	G1_Mideast_B	G1_Mideast_B	TRUE
EPI_ISL_63003	A/chicken/Iran/RZ28/2008	G1_Mideast_B	G1_Mideast_B	TRUE
EPI_ISL_63007	A/chicken/Iran/RZ53/2008	G1_Mideast_B	G1_Mideast_B	TRUE
EPI_ISL_63444	A/chicken/Iran/SH2/2007	G1_Mideast_B	G1_Mideast_B	TRUE
EPI_ISL_15732	A/chicken/Iran/TH186/2007	G1_Mideast_B	G1_Mideast_B	TRUE
EPI_ISL_15729	A/chicken/Iran/TH85/2007	G1_Mideast_B	G1_Mideast_B	TRUE
EPI_ISL_63446	A/chicken/Iran/THLBM862/2007	G1_Mideast_B	G1_Mideast_B	TRUE
EPI_ISL_63447	A/chicken/Iran/THLBM863/2007	G1_Mideast_B	G1_Mideast_B	TRUE
EPI_ISL_63450	A/chicken/Iran/THLBM866/2007	G1_Mideast_B	G1_Mideast_B	TRUE
EPI_ISL_63452	A/chicken/Iran/THLBM868/2007	G1_Mideast_B	G1_Mideast_B	TRUE
EPI_ISL_30439	A/chicken/Israel/182/2008	G1_Mideast_B	G1_Mideast_B	TRUE
EPI_ISL_30440	A/chicken/Israel/184/2009	G1_Mideast_B	G1_Mideast_B	TRUE
EPI_ISL_63455	A/chicken/Israel/215/2007	G1_Mideast_B	G1_Mideast_B	TRUE
EPI_ISL_30445	A/chicken/Israel/694/2008	G1_Mideast_B	G1_Mideast_B	TRUE
EPI_ISL_30446	A/chicken/Israel/702/2008	G1_Mideast_B	G1_Mideast_B	TRUE
EPI_ISL_63459	A/chicken/Israel/728/2007	G1_Mideast_B	G1_Mideast_B	TRUE
EPI_ISL_30448	A/chicken/Israel/883/2008	G1_Mideast_B	G1_Mideast_B	TRUE
EPI_ISL_63460	A/chicken/Israel/933/2007	G1_Mideast_B	G1_Mideast_B	TRUE
EPI_ISL_85776	A/chicken/Jordan/436-1/2010	G1_Mideast_B	G1_Mideast_B	TRUE
EPI_ISL_85777	A/chicken/Jordan/436-2/2010	G1_Mideast_B	G1_Mideast_B	TRUE
EPI_ISL_85796	A/chicken/Kurdistan/4693-9/2009	G1_Mideast_B	G1_Mideast_B	TRUE
EPI_ISL_29787	A/chicken/Pakistan/UDL-01/2005	G1_Mideast_B	G1_Mideast_B	TRUE
EPI_ISL_29789	A/chicken/Pakistan/UDL-01/2006	G1_Mideast_B	G1_Mideast_B	TRUE
EPI_ISL_29793	A/chicken/Pakistan/UDL-01/2008	G1_Mideast_B	G1_Mideast_B	TRUE
EPI_ISL_29788	A/chicken/Pakistan/UDL-02/2005	G1_Mideast_B	G1_Mideast_B	TRUE
EPI_ISL_29790	A/chicken/Pakistan/UDL-02/2006	G1_Mideast_B	G1_Mideast_B	TRUE
EPI_ISL_29794	A/chicken/Pakistan/UDL-02/2008	G1_Mideast_B	G1_Mideast_B	TRUE
EPI_ISL_29786	A/chicken/Pakistan/UDL-04/2006	G1_Mideast_B	G1_Mideast_B	TRUE
EPI_ISL_29796	A/chicken/Pakistan/UDL-04/2007	G1_Mideast_B	G1_Mideast_B	TRUE
EPI_ISL_27601	A/chicken/Punjab/2063/2003	G1_Mideast_B	G1_Mideast_B	TRUE
EPI_ISL_85798	A/chicken/Qatar/4576-4/2008	G1_Mideast_B	G1_Mideast_B	TRUE
EPI_ISL_85780	A/chicken/Saudi_Arabia/08vir3489-33-as638/2005	G1_Mideast_B	G1_Mideast_B	TRUE
EPI_ISL_85781	A/chicken/Saudi_Arabia/08vir3489-38-as92/2005	G1_Mideast_B	G1_Mideast_B	TRUE
EPI_ISL_85782	A/chicken/Saudi_Arabia/08vir3489-44-as253/2006	G1_Mideast_B	G1_Mideast_B	TRUE
EPI_ISL_85786	A/chicken/Saudi_Arabia/08vir3489-47-as215/2007	G1_Mideast_B	G1_Mideast_B	TRUE
EPI_ISL_85788	A/chicken/Saudi_Arabia/08vir3489-50-as118/2008	G1_Mideast_B	G1_Mideast_B	TRUE
EPI_ISL_83300	A/chicken/Tripura/105131/2008	G1_Mideast_B	G1_Mideast_B	TRUE
EPI_ISL_76225	A/chicken/Uchal/8286/2006	G1_Mideast_B	G1_Mideast_B	TRUE
EPI_ISL_76224	A/chicken/Uchal/8293/2006	G1_Mideast_B	G1_Mideast_B	TRUE
EPI_ISL_85784	A/falcon/Saudi_Arabia/08vir3489-40-as977/2006	G1_Mideast_B	G1_Mideast_B	TRUE
EPI_ISL_93285	A/quail/Lebanon/272/2010	G1_Mideast_B	G1_Mideast_B	TRUE
EPI_ISL_64478	A/turkey/Israel/1608/2006	G1_Mideast_B	G1_Mideast_B	TRUE
EPI_ISL_69121	A/watercoot/Haryana/5844/2005	G1_Mideast_B	G1_Mideast_B	TRUE
EPI_ISL_64828	A/chicken/Iran/119/2005	G1_Mideast_D	G1_Mideast_D	TRUE
EPI_ISL_65651	A/chicken/Iran/152/2004	G1_Mideast_D	G1_Mideast_D	TRUE
EPI_ISL_68019	A/chicken/Iran/233/2001	G1_Mideast_D	G1_Mideast_D	TRUE
EPI_ISL_68364	A/chicken/Iran/584/2000	G1_Mideast_D	G1_Mideast_D	TRUE
EPI_ISL_68591	A/chicken/Iran/661/1998	G1_Mideast_D	G1_Mideast_D	TRUE
EPI_ISL_68496	A/chicken/Iran/705/1999	G1_Mideast_D	G1_Mideast_D	TRUE
EPI_ISL_64829	A/chicken/Iran/86/2005	G1_Mideast_D	G1_Mideast_D	TRUE
EPI_ISL_11179	A/chicken/Iran/B308A/2004	G1_Mideast_D	G1_Mideast_D	TRUE
EPI_ISL_11178	A/chicken/Iran/B314/2003	G1_Mideast_D	G1_Mideast_D	TRUE
EPI_ISL_15734	A/chicken/Iran/TH78/1999	G1_Mideast_D	G1_Mideast_D	TRUE
EPI_ISL_15736	A/chicken/Iran/TH80/2000	G1_Mideast_D	G1_Mideast_D	TRUE
EPI_ISL_2909	A/shovelar/Iran/G54/03	G1_Mideast_D	G1_Mideast_D	TRUE
EPI_ISL_10141	A/chicken/Cheongju/ADL0401/2004	KR38349	KR38349	TRUE
EPI_ISL_13845	A/chicken/Korea/01310/2001	KR38349	KR38349	TRUE
EPI_ISL_1275	A/chicken/Korea/25232-96006/96	KR38349	KR38349	TRUE
EPI_ISL_1274	A/chicken/Korea/38349-p96323/96	KR38349	KR38349	TRUE
EPI_ISL_77209	A/chicken/Korea/A170/2009	KR38349	KR38349	TRUE
EPI_ISL_70424	A/chicken/Korea/ADL050895/2005	KR38349	KR38349	TRUE
EPI_ISL_70427	A/chicken/Korea/ADL060168/2006	KR38349	KR38349	TRUE
EPI_ISL_70428	A/chicken/Korea/ADL060196/2006	KR38349	KR38349	TRUE
EPI_ISL_70429	A/chicken/Korea/ADL060580/2006	KR38349	KR38349	TRUE
EPI_ISL_70439	A/chicken/Korea/ADL060831/2006	KR38349	KR38349	TRUE
EPI_ISL_70430	A/chicken/Korea/ADL060845/2006	KR38349	KR38349	TRUE
EPI_ISL_70431	A/chicken/Korea/ADL060865/2006	KR38349	KR38349	TRUE
EPI_ISL_70432	A/chicken/Korea/ADL062128/2006	KR38349	KR38349	TRUE
EPI_ISL_70438	A/chicken/Korea/ADL070121/2007	KR38349	KR38349	TRUE
EPI_ISL_70436	A/chicken/Korea/ADL070801/2007	KR38349	KR38349	TRUE
EPI_ISL_84582	A/chicken/Korea/HC09/2009	KR38349	KR38349	TRUE
EPI_ISL_9886	A/chicken/Korea/S21/04	KR38349	KR38349	TRUE
EPI_ISL_4668	A/chicken/Korea/S4/03	KR38349	KR38349	TRUE
EPI_ISL_84581	A/chicken/Korea/SH0802/2008	KR38349	KR38349	TRUE
EPI_ISL_84583	A/chicken/Korea/SH0902/2009	KR38349	KR38349	TRUE
EPI_ISL_84587	A/chicken/Korea/SH0906/2009	KR38349	KR38349	TRUE
EPI_ISL_84588	A/chicken/Korea/SH0907/2009	KR38349	KR38349	TRUE
EPI_ISL_84592	A/chicken/Korea/SH0911/2009	KR38349	KR38349	TRUE
EPI_ISL_84594	A/chicken/Korea/SH0913/2009	KR38349	KR38349	TRUE
EPI_ISL_77207	A/duck/Korea/A174/2009	KR38349	KR38349	TRUE
EPI_ISL_98907	A/duck/Korea/KNUDPJ09/2009	KR38349	KR38349	TRUE
EPI_ISL_4671	A/duck/Korea/S13/03	KR38349	KR38349	TRUE
EPI_ISL_84585	A/duck/Korea/SH0904/2009	KR38349	KR38349	TRUE
EPI_ISL_84593	A/duck/Korea/SH0912/2009	KR38349	KR38349	TRUE
EPI_ISL_84596	A/duck/Korea/SH0915/2009	KR38349	KR38349	TRUE
EPI_ISL_12597	A/Korea/KBNP-0028/2000	KR38349	KR38349	TRUE
EPI_ISL_4617	A/swine/Korea/S452/2004	KR38349	KR38349	TRUE
EPI_ISL_5800	A/laughing_gull/Delaware/2718/1987	MN5733	MN5733	TRUE
EPI_ISL_4067	A/mallard/Alberta/11/91	MN5733	MN5733	TRUE
EPI_ISL_4047	A/mallard/Alberta/743/83	MN5733	MN5733	TRUE
EPI_ISL_8883	A/mallard_duck/ALB/321/1988	MN5733	MN5733	TRUE
EPI_ISL_99486	A/ruddy_turnstone/Virginia/2297/1988	MN5733	MN5733	TRUE
EPI_ISL_30815	A/laughing_gull/Delaware/12/2006	SB261	SB261	TRUE
EPI_ISL_99339	A/laughing_gull/Delaware_Bay/5/2003	SB261	SB261	TRUE
EPI_ISL_84624	A/shorebird/Delaware/554/2007	SB261	SB261	TRUE
EPI_ISL_94965	A/black_swan/Morpeth/194/2008	VN340	VN340	TRUE
EPI_ISL_247	A/duck/Hokkaido/13/00	VN340	VN340	TRUE
EPI_ISL_28844	A/duck/Hokkaido/238/2008	VN340	VN340	TRUE
EPI_ISL_245	A/duck/Hokkaido/9/99	VN340	VN340	TRUE
EPI_ISL_11897	A/duck/Viet_Nam/340/2001	VN340	VN340	TRUE
EPI_ISL_11896	A/duck/Viet_Nam/68/2001	VN340	VN340	TRUE
EPI_ISL_94952	A/eastern_curlew/Stockton/4204/2008	VN340	VN340	TRUE
EPI_ISL_33856	A/gadwall/Netherlands/1/2006	VN340	VN340	TRUE
EPI_ISL_98893	A/mallard/France/090360/2009	VN340	VN340	TRUE
EPI_ISL_86201	A/mallard/Iran/T366/2007	VN340	VN340	TRUE
EPI_ISL_77452	A/mallard/PT/27972-B139/2007	VN340	VN340	TRUE
EPI_ISL_63562	A/mallard/Switzerland/WV1070805/2007	VN340	VN340	TRUE
EPI_ISL_63563	A/mallard/Switzerland/WV3080008/2007	VN340	VN340	TRUE
EPI_ISL_1488	A/ostrich/South_Africa/9508103/95	VN340	VN340	TRUE
EPI_ISL_97757	A/chicken/Anhui/A21-2/2011	Y280_Fuj_SL6	Y280_Fuj_SL6	TRUE
EPI_ISL_97658	A/chicken/Guangdong/265/2011	Y280_Fuj_SL6	Y280_Fuj_SL6	TRUE
EPI_ISL_97659	A/chicken/Guangdong/283/2011	Y280_Fuj_SL6	Y280_Fuj_SL6	TRUE
EPI_ISL_99612	A/chicken/Guangdong/FJC07/2011	Y280_Fuj_SL6	Y280_Fuj_SL6	TRUE
EPI_ISL_89745	A/chicken/Guangdong/FLS/2011	Y280_Fuj_SL6	Y280_Fuj_SL6	TRUE
EPI_ISL_99607	A/chicken/Guangdong/HMZ11/2011	Y280_Fuj_SL6	Y280_Fuj_SL6	TRUE
EPI_ISL_89744	A/chicken/Guangdong/HYF/2011	Y280_Fuj_SL6	Y280_Fuj_SL6	TRUE
EPI_ISL_89739	A/chicken/Guangdong/LJD/2011	Y280_Fuj_SL6	Y280_Fuj_SL6	TRUE
EPI_ISL_89743	A/chicken/Guangdong/LJH/2011	Y280_Fuj_SL6	Y280_Fuj_SL6	TRUE
EPI_ISL_99608	A/chicken/Guangdong/SQL11/2011	Y280_Fuj_SL6	Y280_Fuj_SL6	TRUE
EPI_ISL_89706	A/chicken/Guangdong/U4/2010	Y280_Fuj_SL6	Y280_Fuj_SL6	TRUE
EPI_ISL_89720	A/chicken/Guangdong/WGH/2011	Y280_Fuj_SL6	Y280_Fuj_SL6	TRUE
EPI_ISL_89731	A/chicken/Guangdong/YJX/2011	Y280_Fuj_SL6	Y280_Fuj_SL6	TRUE
EPI_ISL_98866	A/chicken/Guangdong/ZCY/2011	Y280_Fuj_SL6	Y280_Fuj_SL6	TRUE
EPI_ISL_98865	A/chicken/Guangdong/ZHJ/2011	Y280_Fuj_SL6	Y280_Fuj_SL6	TRUE
EPI_ISL_89728	A/chicken/Guangdong/ZPY/2011	Y280_Fuj_SL6	Y280_Fuj_SL6	TRUE
EPI_ISL_99609	A/chicken/Guangxi/QCR10/2011	Y280_Fuj_SL6	Y280_Fuj_SL6	TRUE
EPI_ISL_98012	A/chicken/Guizhou/E11/2011	Y280_Fuj_SL6	Y280_Fuj_SL6	TRUE
EPI_ISL_98010	A/chicken/Guizhou/G17/2011	Y280_Fuj_SL6	Y280_Fuj_SL6	TRUE
EPI_ISL_99611	A/chicken/Guizhou/LCY09/2011	Y280_Fuj_SL6	Y280_Fuj_SL6	TRUE
EPI_ISL_97998	A/chicken/Hainan/I7/2011	Y280_Fuj_SL6	Y280_Fuj_SL6	TRUE
EPI_ISL_97688	A/chicken/Ningxia/181/2011	Y280_Fuj_SL6	Y280_Fuj_SL6	TRUE
EPI_ISL_13017	A/bird/Guangxi/83/2005	Y280_G9	Y280_G9	TRUE
EPI_ISL_68588	A/chicken/Anhui/1/1998	Y280_G9	Y280_G9	TRUE
EPI_ISL_84317	A/chicken/Anhui/2h/2002	Y280_G9	Y280_G9	TRUE
EPI_ISL_24717	A/chicken/Fujian/2/2002	Y280_G9	Y280_G9	TRUE
EPI_ISL_8494	A/chicken/Fujian/25/00	Y280_G9	Y280_G9	TRUE
EPI_ISL_2234	A/chicken/Guangdong/11/97	Y280_G9	Y280_G9	TRUE
EPI_ISL_24721	A/chicken/Guangdong/16/1999	Y280_G9	Y280_G9	TRUE
EPI_ISL_8498	A/chicken/Guangdong/5/97	Y280_G9	Y280_G9	TRUE
EPI_ISL_8499	A/chicken/Guangdong/56/01	Y280_G9	Y280_G9	TRUE
EPI_ISL_8500	A/chicken/Guangdong/6/97	Y280_G9	Y280_G9	TRUE
EPI_ISL_68726	A/chicken/Guangdong/SS/94	Y280_G9	Y280_G9	TRUE
EPI_ISL_70604	A/chicken/Guangxi/17/2007	Y280_G9	Y280_G9	TRUE
EPI_ISL_7366	A/chicken/Guangxi/187/2005	Y280_G9	Y280_G9	TRUE
EPI_ISL_7370	A/chicken/Guangxi/2389/2005	Y280_G9	Y280_G9	TRUE
EPI_ISL_70606	A/chicken/Guangxi/39/2007	Y280_G9	Y280_G9	TRUE
EPI_ISL_78799	A/chicken/Guangxi/KMIII/1999	Y280_G9	Y280_G9	TRUE
EPI_ISL_2157	A/chicken/Hebei/1/00	Y280_G9	Y280_G9	TRUE
EPI_ISL_67722	A/chicken/Hebei/nj/2002	Y280_G9	Y280_G9	TRUE
EPI_ISL_24724	A/chicken/Hebei/sjz2/2001	Y280_G9	Y280_G9	TRUE
EPI_ISL_2236	A/chicken/Heilongjiang/10/97	Y280_G9	Y280_G9	TRUE
EPI_ISL_24918	A/chicken/Henan/01/2007	Y280_G9	Y280_G9	TRUE
EPI_ISL_65629	A/chicken/Henan/1/2004	Y280_G9	Y280_G9	TRUE
EPI_ISL_64827	A/chicken/Henan/1/2005	Y280_G9	Y280_G9	TRUE
EPI_ISL_65630	A/chicken/Henan/2/2004	Y280_G9	Y280_G9	TRUE
EPI_ISL_93811	A/chicken/Henan/N3/2002	Y280_G9	Y280_G9	TRUE
EPI_ISL_14003	A/chicken/Hubei/C1/2007	Y280_G9	Y280_G9	TRUE
EPI_ISL_67726	A/chicken/Hunan/774/2002	Y280_G9	Y280_G9	TRUE
EPI_ISL_68599	A/chicken/Jiangsu/1/1998	Y280_G9	Y280_G9	TRUE
EPI_ISL_68502	A/chicken/Jiangsu/1/1999	Y280_G9	Y280_G9	TRUE
EPI_ISL_67729	A/chicken/Jiangsu/1/2002	Y280_G9	Y280_G9	TRUE
EPI_ISL_65631	A/chicken/Jiangsu/1/2004	Y280_G9	Y280_G9	TRUE
EPI_ISL_68025	A/chicken/Jiangsu/2/2001	Y280_G9	Y280_G9	TRUE
EPI_ISL_2152	A/chicken/Jiangsu/2/98	Y280_G9	Y280_G9	TRUE
EPI_ISL_90380	A/chicken/Jiangsu/48/2001	Y280_G9	Y280_G9	TRUE
EPI_ISL_3588	A/chicken/Jiangsu/JS-1/2002	Y280_G9	Y280_G9	TRUE
EPI_ISL_24726	A/chicken/Jiangsu/nj13/2001	Y280_G9	Y280_G9	TRUE
EPI_ISL_335	A/chicken/Kobe/aq26/2001	Y280_G9	Y280_G9	TRUE
EPI_ISL_3692	A/chicken/Mudanjiang/0823/2000	Y280_G9	Y280_G9	TRUE
EPI_ISL_67738	A/chicken/Neimonggu/nk/2002	Y280_G9	Y280_G9	TRUE
EPI_ISL_2238	A/chicken/Ningxia/5/99	Y280_G9	Y280_G9	TRUE
EPI_ISL_333	A/chicken/Osaka/aq48/97	Y280_G9	Y280_G9	TRUE
EPI_ISL_337	A/chicken/Osaka/aq69/2001	Y280_G9	Y280_G9	TRUE
EPI_ISL_24712	A/chicken/Shandong/2/2003	Y280_G9	Y280_G9	TRUE
EPI_ISL_84313	A/chicken/Shandong/2h/2001	Y280_G9	Y280_G9	TRUE
EPI_ISL_8513	A/chicken/Shandong/7/96	Y280_G9	Y280_G9	TRUE
EPI_ISL_77228	A/chicken/Shandong/JN4/2005	Y280_G9	Y280_G9	TRUE
EPI_ISL_77229	A/chicken/Shandong/JN5/2005	Y280_G9	Y280_G9	TRUE
EPI_ISL_82537	A/chicken/Shandong/SD0014/2008	Y280_G9	Y280_G9	TRUE
EPI_ISL_8514	A/chicken/Shanghai/10/01	Y280_G9	Y280_G9	TRUE
EPI_ISL_2163	A/chicken/Shanghai/3/00	Y280_G9	Y280_G9	TRUE
EPI_ISL_3093	A/chicken/Shanghai/4/01	Y280_G9	Y280_G9	TRUE
EPI_ISL_2165	A/chicken/Shanghai/4-2/01	Y280_G9	Y280_G9	TRUE
EPI_ISL_7475	A/chicken/Shantou/1322/2000	Y280_G9	Y280_G9	TRUE
EPI_ISL_7474	A/chicken/Shantou/859/2000	Y280_G9	Y280_G9	TRUE
EPI_ISL_7472	A/chicken/Shantou/94/2000	Y280_G9	Y280_G9	TRUE
EPI_ISL_8515	A/chicken/Shijiazhuang/2/98	Y280_G9	Y280_G9	TRUE
EPI_ISL_2239	A/chicken/Sichuan/5/97	Y280_G9	Y280_G9	TRUE
EPI_ISL_2166	A/chicken/Tianjing/1/96	Y280_G9	Y280_G9	TRUE
EPI_ISL_339	A/chicken/Yokohama/aq134/2002	Y280_G9	Y280_G9	TRUE
EPI_ISL_2169	A/chicken/Yunnan/2/00	Y280_G9	Y280_G9	TRUE
EPI_ISL_7389	A/chicken/Yunnan/3727/2004	Y280_G9	Y280_G9	TRUE
EPI_ISL_7382	A/chicken/Yunnan/401/2002	Y280_G9	Y280_G9	TRUE
EPI_ISL_7386	A/chicken/Yunnan/5653/2003	Y280_G9	Y280_G9	TRUE
EPI_ISL_7384	A/chicken/Yunnan/955/2002	Y280_G9	Y280_G9	TRUE
EPI_ISL_68028	A/chicken/Yunnan/nh/2001	Y280_G9	Y280_G9	TRUE
EPI_ISL_29377	A/duck/Hong_Kong/W213/1997	Y280_G9	Y280_G9	TRUE
EPI_ISL_34046	A/duck/Jiangsu/9/2004	Y280_G9	Y280_G9	TRUE
EPI_ISL_2243	A/duck/Nanjing/1/97	Y280_G9	Y280_G9	TRUE
EPI_ISL_10366	A/duck/Xuzhou/05/2001	Y280_G9	Y280_G9	TRUE
EPI_ISL_97019	A/environment/Hong_Kong/1226/1999	Y280_G9	Y280_G9	TRUE
EPI_ISL_1265	A/Pigeon/Hong_Kong/Y233/97	Y280_G9	Y280_G9	TRUE
EPI_ISL_3199	A/quail/Nanchang/2-0460/2000	Y280_G9	Y280_G9	TRUE
EPI_ISL_12580	A/swine/Guangxi/58/2005	Y280_G9	Y280_G9	TRUE
EPI_ISL_13020	A/swine/Guangxi/FS2/2005	Y280_G9	Y280_G9	TRUE
EPI_ISL_141	A/swine/Hong_Kong/10/98	Y280_G9	Y280_G9	TRUE
EPI_ISL_84311	A/swine/Shandong/3/2003	Y280_G9	Y280_G9	TRUE
EPI_ISL_84312	A/swine/Shandong/8/2003	Y280_G9	Y280_G9	TRUE
EPI_ISL_67428	A/swine/Shandong/fLS/2003	Y280_G9	Y280_G9	TRUE
EPI_ISL_67430	A/swine/Shandong/fZC/2003	Y280_G9	Y280_G9	TRUE
EPI_ISL_67422	A/swine/Shandong/na/2003	Y280_G9	Y280_G9	TRUE
EPI_ISL_64951	A/swine/Shandong/nc/2005	Y280_G9	Y280_G9	TRUE
EPI_ISL_67424	A/swine/Shandong/w4/2003	Y280_G9	Y280_G9	TRUE
EPI_ISL_76661	A/chicken/Hebei/A/2007	Y280_Sha_ZB07	Y280_Sha_ZB07	TRUE
EPI_ISL_76662	A/chicken/Hebei/Y2/2009	Y280_Sha_ZB07	Y280_Sha_ZB07	TRUE
EPI_ISL_24736	A/chicken/Shandong/lx414/2007	Y280_Sha_ZB07	Y280_Sha_ZB07	TRUE
EPI_ISL_13019	A/bird/Guangxi/A1/2006	Y280B	Y280B	TRUE
EPI_ISL_93624	A/canine/Guangxi/1/2011/H9N2	Y280B	Y280B	TRUE
EPI_ISL_98114	A/chicken/Anhui/A17/2011	Y280B	Y280B	TRUE
EPI_ISL_29161	A/chicken/Anhui/AH16/2008	Y280B	Y280B	TRUE
EPI_ISL_29162	A/chicken/Anhui/AH23/2008	Y280B	Y280B	TRUE
EPI_ISL_29163	A/chicken/Anhui/AI16/2008	Y280B	Y280B	TRUE
EPI_ISL_29164	A/chicken/Anhui/AK13/2008	Y280B	Y280B	TRUE
EPI_ISL_29165	A/chicken/Anhui/AK25/2008	Y280B	Y280B	TRUE
EPI_ISL_97754	A/chicken/Anhui/B19/2011	Y280B	Y280B	TRUE
EPI_ISL_97756	A/chicken/Anhui/B6/2011	Y280B	Y280B	TRUE
EPI_ISL_97586	A/chicken/Anhui/D21/2010	Y280B	Y280B	TRUE
EPI_ISL_97745	A/chicken/Anhui/E15/2011	Y280B	Y280B	TRUE
EPI_ISL_98087	A/chicken/Anhui/E29/2011	Y280B	Y280B	TRUE
EPI_ISL_97642	A/chicken/Anhui/G15/2010	Y280B	Y280B	TRUE
EPI_ISL_97734	A/chicken/Anhui/G18/2011	Y280B	Y280B	TRUE
EPI_ISL_89714	A/chicken/Anhui/GQY/2011	Y280B	Y280B	TRUE
EPI_ISL_98069	A/chicken/Anhui/I24/2011	Y280B	Y280B	TRUE
EPI_ISL_98062	A/chicken/Anhui/I8/2011	Y280B	Y280B	TRUE
EPI_ISL_97725	A/chicken/Anhui/K3-2/2011	Y280B	Y280B	TRUE
EPI_ISL_97717	A/chicken/Anhui/M2/2011	Y280B	Y280B	TRUE
EPI_ISL_97715	A/chicken/Anhui/M5/2011	Y280B	Y280B	TRUE
EPI_ISL_89750	A/chicken/Anhui/XMS/2011	Y280B	Y280B	TRUE
EPI_ISL_89715	A/chicken/Anhui/ZTL/2011	Y280B	Y280B	TRUE
EPI_ISL_99613	A/chicken/Anhui/ZYX05/2011	Y280B	Y280B	TRUE
EPI_ISL_84536	A/chicken/Baoshan/111/2009	Y280B	Y280B	TRUE
EPI_ISL_84544	A/chicken/Baoshan/711/2008	Y280B	Y280B	TRUE
EPI_ISL_2170	A/chicken/Beijing/1/97	Y280B	Y280B	TRUE
EPI_ISL_2232	A/chicken/Beijing/8/98	Y280B	Y280B	TRUE
EPI_ISL_4042	A/chicken/Beijing/9/98	Y280B	Y280B	TRUE
EPI_ISL_13996	A/chicken/Beijing/L1/2005	Y280B	Y280B	TRUE
EPI_ISL_69854	A/chicken/China	Y280B	Y280B	TRUE
EPI_ISL_2851	A/chicken/China/AG518/2001	Y280B	Y280B	TRUE
EPI_ISL_90154	A/chicken/China/AH-10-01/2010	Y280B	Y280B	TRUE
EPI_ISL_10168	A/chicken/China/Guangxi1/2000	Y280B	Y280B	TRUE
EPI_ISL_10169	A/chicken/China/Guangxi14/2000	Y280B	Y280B	TRUE
EPI_ISL_10170	A/chicken/China/Guangxi17/2000	Y280B	Y280B	TRUE
EPI_ISL_97669	A/chicken/Chongqing/A56/2011	Y280B	Y280B	TRUE
EPI_ISL_97660	A/chicken/Chongqing/D17/2011	Y280B	Y280B	TRUE
EPI_ISL_98031	A/chicken/Chongqing/G14/2011	Y280B	Y280B	TRUE
EPI_ISL_98029	A/chicken/Chongqing/G21/2011	Y280B	Y280B	TRUE
EPI_ISL_98028	A/chicken/Chongqing/G23/2011	Y280B	Y280B	TRUE
EPI_ISL_98027	A/chicken/Chongqing/G25/2011	Y280B	Y280B	TRUE
EPI_ISL_97671	A/chicken/Chongqing/K16/2011	Y280B	Y280B	TRUE
EPI_ISL_97663	A/chicken/Chongqing/K23/2011	Y280B	Y280B	TRUE
EPI_ISL_97670	A/chicken/Chongqing/K3/2011	Y280B	Y280B	TRUE
EPI_ISL_97672	A/chicken/Chongqing/K7/2011	Y280B	Y280B	TRUE
EPI_ISL_84540	A/chicken/Dehong/411/2009	Y280B	Y280B	TRUE
EPI_ISL_73998	A/chicken/Fujian/11/2007	Y280B	Y280B	TRUE
EPI_ISL_7362	A/chicken/Fujian/12252/2005	Y280B	Y280B	TRUE
EPI_ISL_7344	A/chicken/Fujian/3080/2005	Y280B	Y280B	TRUE
EPI_ISL_7346	A/chicken/Fujian/4820/2005	Y280B	Y280B	TRUE
EPI_ISL_7348	A/chicken/Fujian/5683/2005	Y280B	Y280B	TRUE
EPI_ISL_29154	A/chicken/Fujian/FG13/2007	Y280B	Y280B	TRUE
EPI_ISL_29152	A/chicken/Fujian/FH7/2007	Y280B	Y280B	TRUE
EPI_ISL_89652	A/chicken/Fujian/G9/2009	Y280B	Y280B	TRUE
EPI_ISL_99614	A/chicken/Fujian/HJF04/2011	Y280B	Y280B	TRUE
EPI_ISL_89733	A/chicken/Fujian/SL4/2011	Y280B	Y280B	TRUE
EPI_ISL_2155	A/chicken/Gangxi/1/00	Y280B	Y280B	TRUE
EPI_ISL_24917	A/chicken/Guangdong/02/2007	Y280B	Y280B	TRUE
EPI_ISL_24718	A/chicken/Guangdong/1/2002	Y280B	Y280B	TRUE
EPI_ISL_8495	A/chicken/Guangdong/21/02	Y280B	Y280B	TRUE
EPI_ISL_24722	A/chicken/Guangdong/22/2001	Y280B	Y280B	TRUE
EPI_ISL_8496	A/chicken/Guangdong/4/00	Y280B	Y280B	TRUE
EPI_ISL_8497	A/chicken/Guangdong/47/01	Y280B	Y280B	TRUE
EPI_ISL_69429	A/chicken/Guangdong/A4/2003	Y280B	Y280B	TRUE
EPI_ISL_69421	A/chicken/Guangdong/A6/2003	Y280B	Y280B	TRUE
EPI_ISL_69415	A/chicken/Guangdong/A7/2002	Y280B	Y280B	TRUE
EPI_ISL_69428	A/chicken/Guangdong/B2/2006	Y280B	Y280B	TRUE
EPI_ISL_69418	A/chicken/Guangdong/B5/2002	Y280B	Y280B	TRUE
EPI_ISL_69419	A/chicken/Guangdong/B7/2003	Y280B	Y280B	TRUE
EPI_ISL_69417	A/chicken/Guangdong/B9/2002	Y280B	Y280B	TRUE
EPI_ISL_97515	A/chicken/Guangdong/D2/2010	Y280B	Y280B	TRUE
EPI_ISL_97512	A/chicken/Guangdong/D8/2010	Y280B	Y280B	TRUE
EPI_ISL_99619	A/chicken/Guangdong/DJN03/2011	Y280B	Y280B	TRUE
EPI_ISL_69409	A/chicken/Guangdong/E23/2008	Y280B	Y280B	TRUE
EPI_ISL_69411	A/chicken/Guangdong/E25/2008	Y280B	Y280B	TRUE
EPI_ISL_69430	A/chicken/Guangdong/G7/2009	Y280B	Y280B	TRUE
EPI_ISL_97508	A/chicken/Guangdong/H28/2010	Y280B	Y280B	TRUE
EPI_ISL_69412	A/chicken/Guangdong/HE10/2009	Y280B	Y280B	TRUE
EPI_ISL_69424	A/chicken/Guangdong/HE12/2008	Y280B	Y280B	TRUE
EPI_ISL_69413	A/chicken/Guangdong/HE21/2008	Y280B	Y280B	TRUE
EPI_ISL_69414	A/chicken/Guangdong/HE22/2008	Y280B	Y280B	TRUE
EPI_ISL_89648	A/chicken/Guangdong/Q6/2010	Y280B	Y280B	TRUE
EPI_ISL_7371	A/chicken/Guangxi/4745/2005	Y280B	Y280B	TRUE
EPI_ISL_13012	A/chicken/Guangxi/6/2000	Y280B	Y280B	TRUE
EPI_ISL_99615	A/chicken/Guangxi/LRW04/2011	Y280B	Y280B	TRUE
EPI_ISL_89742	A/chicken/Guangxi/MFX/2011	Y280B	Y280B	TRUE
EPI_ISL_77226	A/chicken/Guangzhou/GZ/2005	Y280B	Y280B	TRUE
EPI_ISL_97579	A/chicken/Guizhou/D15/2010	Y280B	Y280B	TRUE
EPI_ISL_97703	A/chicken/Guizhou/D26/2011	Y280B	Y280B	TRUE
EPI_ISL_97571	A/chicken/Guizhou/E25/2010	Y280B	Y280B	TRUE
EPI_ISL_97575	A/chicken/Guizhou/E9/2010	Y280B	Y280B	TRUE
EPI_ISL_99616	A/chicken/Guizhou/XK04/2011	Y280B	Y280B	TRUE
EPI_ISL_98006	A/chicken/Hainan/A13/2011	Y280B	Y280B	TRUE
EPI_ISL_98004	A/chicken/Hainan/A4/2011	Y280B	Y280B	TRUE
EPI_ISL_97992	A/chicken/Hainan/J3/2011	Y280B	Y280B	TRUE
EPI_ISL_97988	A/chicken/Hainan/J6/2011	Y280B	Y280B	TRUE
EPI_ISL_89649	A/chicken/Hainan/Q4/2010	Y280B	Y280B	TRUE
EPI_ISL_84330	A/chicken/Hebei/0329/2007	Y280B	Y280B	TRUE
EPI_ISL_24723	A/chicken/Hebei/2/2002	Y280B	Y280B	TRUE
EPI_ISL_8503	A/chicken/Hebei/31/00	Y280B	Y280B	TRUE
EPI_ISL_2235	A/chicken/Hebei/4/98	Y280B	Y280B	TRUE
EPI_ISL_13995	A/chicken/Hebei/B1/2001	Y280B	Y280B	TRUE
EPI_ISL_84327	A/chicken/Hebei/C6/2007	Y280B	Y280B	TRUE
EPI_ISL_84326	A/chicken/Hebei/LC/2008	Y280B	Y280B	TRUE
EPI_ISL_74001	A/chicken/Heibei/8/2003	Y280B	Y280B	TRUE
EPI_ISL_8505	A/chicken/Heilongjiang/48/01	Y280B	Y280B	TRUE
EPI_ISL_24709	A/chicken/Henan/1/2001	Y280B	Y280B	TRUE
EPI_ISL_67372	A/chicken/Henan/1/2003	Y280B	Y280B	TRUE
EPI_ISL_24710	A/chicken/Henan/5/2001	Y280B	Y280B	TRUE
EPI_ISL_8508	A/chicken/Henan/5/98	Y280B	Y280B	TRUE
EPI_ISL_24711	A/chicken/Henan/622/2006	Y280B	Y280B	TRUE
EPI_ISL_97583	A/chicken/Henan/A16/2010	Y280B	Y280B	TRUE
EPI_ISL_97983	A/chicken/Henan/B6/2011	Y280B	Y280B	TRUE
EPI_ISL_97700	A/chicken/Henan/D17/2011	Y280B	Y280B	TRUE
EPI_ISL_97981	A/chicken/Henan/D21/2011	Y280B	Y280B	TRUE
EPI_ISL_97973	A/chicken/Henan/E18/2011	Y280B	Y280B	TRUE
EPI_ISL_97632	A/chicken/Henan/E2/2010	Y280B	Y280B	TRUE
EPI_ISL_97972	A/chicken/Henan/E2/2011	Y280B	Y280B	TRUE
EPI_ISL_97971	A/chicken/Henan/E21/2011	Y280B	Y280B	TRUE
EPI_ISL_97970	A/chicken/Henan/E24/2011	Y280B	Y280B	TRUE
EPI_ISL_97630	A/chicken/Henan/F14/2010	Y280B	Y280B	TRUE
EPI_ISL_97958	A/chicken/Henan/F16/2011	Y280B	Y280B	TRUE
EPI_ISL_97629	A/chicken/Henan/F17/2010	Y280B	Y280B	TRUE
EPI_ISL_97955	A/chicken/Henan/F21/2011	Y280B	Y280B	TRUE
EPI_ISL_97619	A/chicken/Henan/G11/2010	Y280B	Y280B	TRUE
EPI_ISL_97617	A/chicken/Henan/G15/2010	Y280B	Y280B	TRUE
EPI_ISL_97942	A/chicken/Henan/G15/2011	Y280B	Y280B	TRUE
EPI_ISL_97614	A/chicken/Henan/G20/2010	Y280B	Y280B	TRUE
EPI_ISL_97922	A/chicken/Henan/H15/2011	Y280B	Y280B	TRUE
EPI_ISL_97919	A/chicken/Henan/H22/2011	Y280B	Y280B	TRUE
EPI_ISL_97912	A/chicken/Henan/H29/2011	Y280B	Y280B	TRUE
EPI_ISL_97910	A/chicken/Henan/H5/2011	Y280B	Y280B	TRUE
EPI_ISL_97909	A/chicken/Henan/H6/2011	Y280B	Y280B	TRUE
EPI_ISL_97905	A/chicken/Henan/I27/2011	Y280B	Y280B	TRUE
EPI_ISL_97898	A/chicken/Henan/J22/2011	Y280B	Y280B	TRUE
EPI_ISL_97886	A/chicken/Henan/K19/2011	Y280B	Y280B	TRUE
EPI_ISL_3216	A/chicken/Hong_Kong/WF2/99	Y280B	Y280B	TRUE
EPI_ISL_4451	A/chicken/HongKong/CSW153/03	Y280B	Y280B	TRUE
EPI_ISL_4455	A/chicken/HongKong/CSW304/03	Y280B	Y280B	TRUE
EPI_ISL_4458	A/chicken/HongKong/NT142/03	Y280B	Y280B	TRUE
EPI_ISL_4467	A/chicken/HongKong/NT366/03	Y280B	Y280B	TRUE
EPI_ISL_4468	A/chicken/HongKong/SSP418/03	Y280B	Y280B	TRUE
EPI_ISL_4461	A/chicken/HongKong/TP38/03	Y280B	Y280B	TRUE
EPI_ISL_4466	A/chicken/HongKong/WF120/03	Y280B	Y280B	TRUE
EPI_ISL_4469	A/chicken/HongKong/YU427/03	Y280B	Y280B	TRUE
EPI_ISL_97682	A/chicken/Hubei/558/2011	Y280B	Y280B	TRUE
EPI_ISL_97548	A/chicken/Hubei/A28/2010	Y280B	Y280B	TRUE
EPI_ISL_69396	A/chicken/Hubei/E13/2008	Y280B	Y280B	TRUE
EPI_ISL_97534	A/chicken/Hubei/E16/2010	Y280B	Y280B	TRUE
EPI_ISL_97533	A/chicken/Hubei/E17/2010	Y280B	Y280B	TRUE
EPI_ISL_97532	A/chicken/Hubei/E18/2010	Y280B	Y280B	TRUE
EPI_ISL_97528	A/chicken/Hubei/E23/2010	Y280B	Y280B	TRUE
EPI_ISL_97539	A/chicken/Hubei/E8/2010	Y280B	Y280B	TRUE
EPI_ISL_97517	A/chicken/Hubei/G21/2010	Y280B	Y280B	TRUE
EPI_ISL_97523	A/chicken/Hubei/G5/2010	Y280B	Y280B	TRUE
EPI_ISL_97522	A/chicken/Hubei/G6/2010	Y280B	Y280B	TRUE
EPI_ISL_97521	A/chicken/Hubei/G9/2010	Y280B	Y280B	TRUE
EPI_ISL_89723	A/chicken/Hubei/GYC/2011	Y280B	Y280B	TRUE
EPI_ISL_89730	A/chicken/Hubei/HWC/2011	Y280B	Y280B	TRUE
EPI_ISL_99617	A/chicken/Hubei/LLM03/2011	Y280B	Y280B	TRUE
EPI_ISL_89729	A/chicken/Hubei/ZWC/2011	Y280B	Y280B	TRUE
EPI_ISL_7378	A/chicken/Hunan/4444/2005	Y280B	Y280B	TRUE
EPI_ISL_7380	A/chicken/Hunan/5700/2005	Y280B	Y280B	TRUE
EPI_ISL_29149	A/chicken/Hunan/HB25/2007	Y280B	Y280B	TRUE
EPI_ISL_29148	A/chicken/Hunan/HB29/2007	Y280B	Y280B	TRUE
EPI_ISL_29166	A/chicken/Hunan/HB5/2007	Y280B	Y280B	TRUE
EPI_ISL_29147	A/chicken/Hunan/HG29/2007	Y280B	Y280B	TRUE
EPI_ISL_73326	A/chicken/Jiande/01/2009	Y280B	Y280B	TRUE
EPI_ISL_97565	A/chicken/Jiangsu/A20/2010	Y280B	Y280B	TRUE
EPI_ISL_97569	A/chicken/Jiangsu/A7/2010	Y280B	Y280B	TRUE
EPI_ISL_97568	A/chicken/Jiangsu/A9/2010	Y280B	Y280B	TRUE
EPI_ISL_97880	A/chicken/Jiangsu/B12/2011	Y280B	Y280B	TRUE
EPI_ISL_97871	A/chicken/Jiangsu/B25/2011	Y280B	Y280B	TRUE
EPI_ISL_97870	A/chicken/Jiangsu/B27/2011	Y280B	Y280B	TRUE
EPI_ISL_97867	A/chicken/Jiangsu/B4/2011	Y280B	Y280B	TRUE
EPI_ISL_97862	A/chicken/Jiangsu/D10/2011	Y280B	Y280B	TRUE
EPI_ISL_99618	A/chicken/Jiangsu/FQD03/2011	Y280B	Y280B	TRUE
EPI_ISL_97612	A/chicken/Jiangsu/G12/2010	Y280B	Y280B	TRUE
EPI_ISL_97860	A/chicken/Jiangsu/H10/2011	Y280B	Y280B	TRUE
EPI_ISL_97560	A/chicken/Jiangsu/H11/2010	Y280B	Y280B	TRUE
EPI_ISL_97859	A/chicken/Jiangsu/H13/2011	Y280B	Y280B	TRUE
EPI_ISL_97858	A/chicken/Jiangsu/H2/2011	Y280B	Y280B	TRUE
EPI_ISL_97557	A/chicken/Jiangsu/H25/2010	Y280B	Y280B	TRUE
EPI_ISL_97857	A/chicken/Jiangsu/H27/2011	Y280B	Y280B	TRUE
EPI_ISL_97853	A/chicken/Jiangsu/I2/2011	Y280B	Y280B	TRUE
EPI_ISL_97852	A/chicken/Jiangsu/I20/2011	Y280B	Y280B	TRUE
EPI_ISL_89740	A/chicken/Jiangsu/LWC/2011	Y280B	Y280B	TRUE
EPI_ISL_89650	A/chicken/Jiangsu/Q3/2010	Y280B	Y280B	TRUE
EPI_ISL_89646	A/chicken/Jiangsu/U1/2010	Y280B	Y280B	TRUE
EPI_ISL_89645	A/chicken/Jiangsu/U2/2010	Y280B	Y280B	TRUE
EPI_ISL_89734	A/chicken/Jiangsu/WXY/2011	Y280B	Y280B	TRUE
EPI_ISL_89727	A/chicken/Jiangsu/ZHM/2011	Y280B	Y280B	TRUE
EPI_ISL_84325	A/chicken/Jiangxi/12/2007	Y280B	Y280B	TRUE
EPI_ISL_2159	A/chicken/Liaoning/1/00	Y280B	Y280B	TRUE
EPI_ISL_2160	A/chicken/Liaoning/2/00	Y280B	Y280B	TRUE
EPI_ISL_63461	A/chicken/Liaoning/21/7/2007	Y280B	Y280B	TRUE
EPI_ISL_29160	A/chicken/Liaoning/3/2007	Y280B	Y280B	TRUE
EPI_ISL_63462	A/chicken/Liaoning/41/17/2007	Y280B	Y280B	TRUE
EPI_ISL_84546	A/chicken/Lincang/711/2008	Y280B	Y280B	TRUE
EPI_ISL_97698	A/chicken/Ningxia/29/2011	Y280B	Y280B	TRUE
EPI_ISL_97696	A/chicken/Ningxia/31/2011	Y280B	Y280B	TRUE
EPI_ISL_8512	A/chicken/Ningxia/4/99	Y280B	Y280B	TRUE
EPI_ISL_97845	A/chicken/Ningxia/A2/2011	Y280B	Y280B	TRUE
EPI_ISL_97844	A/chicken/Ningxia/A21/2011	Y280B	Y280B	TRUE
EPI_ISL_342	A/chicken/Osaka/aq19/2001	Y280B	Y280B	TRUE
EPI_ISL_336	A/chicken/Osaka/aq58/2001	Y280B	Y280B	TRUE
EPI_ISL_84538	A/chicken/Puer/411/2009	Y280B	Y280B	TRUE
EPI_ISL_74004	A/chicken/Sandong/Li/2008	Y280B	Y280B	TRUE
EPI_ISL_67390	A/chicken/Shandong/1/2003	Y280B	Y280B	TRUE
EPI_ISL_84324	A/chicken/Shandong/1/2006	Y280B	Y280B	TRUE
EPI_ISL_84323	A/chicken/Shandong/12/2008	Y280B	Y280B	TRUE
EPI_ISL_84321	A/chicken/Shandong/1231/2008	Y280B	Y280B	TRUE
EPI_ISL_2162	A/chicken/Shandong/2/99	Y280B	Y280B	TRUE
EPI_ISL_84322	A/chicken/Shandong/22/2008	Y280B	Y280B	TRUE
EPI_ISL_80509	A/chicken/Shandong/A1/2009	Y280B	Y280B	TRUE
EPI_ISL_77227	A/chicken/Shandong/BD/2009	Y280B	Y280B	TRUE
EPI_ISL_82193	A/chicken/Shandong/C/2009	Y280B	Y280B	TRUE
EPI_ISL_97248	A/chicken/Shandong/E/2010	Y280B	Y280B	TRUE
EPI_ISL_77200	A/chicken/Shandong/FX/2009	Y280B	Y280B	TRUE
EPI_ISL_77198	A/chicken/Shandong/HY/2009	Y280B	Y280B	TRUE
EPI_ISL_97246	A/chicken/Shandong/L/2010	Y280B	Y280B	TRUE
EPI_ISL_24732	A/chicken/Shandong/lc1124/2007	Y280B	Y280B	TRUE
EPI_ISL_77231	A/chicken/Shandong/LW/1999	Y280B	Y280B	TRUE
EPI_ISL_24737	A/chicken/Shandong/lx1023/2007	Y280B	Y280B	TRUE
EPI_ISL_84320	A/chicken/Shandong/LY/2006	Y280B	Y280B	TRUE
EPI_ISL_77232	A/chicken/Shandong/LY/2008	Y280B	Y280B	TRUE
EPI_ISL_97245	A/chicken/Shandong/M/2010	Y280B	Y280B	TRUE
EPI_ISL_24741	A/chicken/Shandong/mp1224/2007	Y280B	Y280B	TRUE
EPI_ISL_24920	A/chicken/Shandong/qd04/2007	Y280B	Y280B	TRUE
EPI_ISL_77233	A/chicken/Shandong/S2/2005	Y280B	Y280B	TRUE
EPI_ISL_77201	A/chicken/Shandong/SG1/2009	Y280B	Y280B	TRUE
EPI_ISL_77202	A/chicken/Shandong/SG2/2009	Y280B	Y280B	TRUE
EPI_ISL_97602	A/chicken/Shandong/TH9/2010	Y280B	Y280B	TRUE
EPI_ISL_97812	A/chicken/Shandong/WG10/2011	Y280B	Y280B	TRUE
EPI_ISL_77199	A/chicken/Shandong/WL/2009	Y280B	Y280B	TRUE
EPI_ISL_24742	A/chicken/Shandong/yt1105/2007	Y280B	Y280B	TRUE
EPI_ISL_24730	A/chicken/Shandong/zc820/2006	Y280B	Y280B	TRUE
EPI_ISL_7313	A/chicken/Shantou/1138/2004	Y280B	Y280B	TRUE
EPI_ISL_7481	A/chicken/Shantou/1205/2001	Y280B	Y280B	TRUE
EPI_ISL_7300	A/chicken/Shantou/1404/2003	Y280B	Y280B	TRUE
EPI_ISL_7476	A/chicken/Shantou/1579/2000	Y280B	Y280B	TRUE
EPI_ISL_7483	A/chicken/Shantou/1608/2001	Y280B	Y280B	TRUE
EPI_ISL_7484	A/chicken/Shantou/1610/2001	Y280B	Y280B	TRUE
EPI_ISL_7301	A/chicken/Shantou/1689/2003	Y280B	Y280B	TRUE
EPI_ISL_7485	A/chicken/Shantou/1890/2001	Y280B	Y280B	TRUE
EPI_ISL_7315	A/chicken/Shantou/1926/2004	Y280B	Y280B	TRUE
EPI_ISL_7479	A/chicken/Shantou/2098/2000	Y280B	Y280B	TRUE
EPI_ISL_7473	A/chicken/Shantou/212/2000	Y280B	Y280B	TRUE
EPI_ISL_7293	A/chicken/Shantou/2204/2002	Y280B	Y280B	TRUE
EPI_ISL_7341	A/chicken/Shantou/22054/2005	Y280B	Y280B	TRUE
EPI_ISL_7342	A/chicken/Shantou/22504/2005	Y280B	Y280B	TRUE
EPI_ISL_7302	A/chicken/Shantou/2686/2003	Y280B	Y280B	TRUE
EPI_ISL_7318	A/chicken/Shantou/2994/2004	Y280B	Y280B	TRUE
EPI_ISL_7304	A/chicken/Shantou/3341/2003	Y280B	Y280B	TRUE
EPI_ISL_7305	A/chicken/Shantou/4101/2003	Y280B	Y280B	TRUE
EPI_ISL_7295	A/chicken/Shantou/4342/2002	Y280B	Y280B	TRUE
EPI_ISL_7491	A/chicken/Shantou/5028/2001	Y280B	Y280B	TRUE
EPI_ISL_7297	A/chicken/Shantou/69/2003	Y280B	Y280B	TRUE
EPI_ISL_7327	A/chicken/Shantou/7920/2004	Y280B	Y280B	TRUE
EPI_ISL_7298	A/chicken/Shantou/944/2003	Y280B	Y280B	TRUE
EPI_ISL_7309	A/chicken/Shantou/99/2004	Y280B	Y280B	TRUE
EPI_ISL_97798	A/chicken/Shanxi/B3/2011	Y280B	Y280B	TRUE
EPI_ISL_97793	A/chicken/Shanxi/D4/2011	Y280B	Y280B	TRUE
EPI_ISL_69402	A/chicken/Sichuan/G2/2009	Y280B	Y280B	TRUE
EPI_ISL_69403	A/chicken/Sichuan/G3/2009	Y280B	Y280B	TRUE
EPI_ISL_69406	A/chicken/Sichuan/G6/2009	Y280B	Y280B	TRUE
EPI_ISL_89114	A/chicken/Tibet/S1/2009	Y280B	Y280B	TRUE
EPI_ISL_84541	A/chicken/Wenshan/412/2009	Y280B	Y280B	TRUE
EPI_ISL_29145	A/chicken/Xinjiang/XJ154/2007	Y280B	Y280B	TRUE
EPI_ISL_29146	A/chicken/Xinjiang/XJ75/2007	Y280B	Y280B	TRUE
EPI_ISL_13563	A/chicken/YN/BanNa2/2006	Y280B	Y280B	TRUE
EPI_ISL_343	A/chicken/Yokohama/aq144/2001	Y280B	Y280B	TRUE
EPI_ISL_334	A/chicken/Yokohama/aq55/2001	Y280B	Y280B	TRUE
EPI_ISL_13760	A/chicken/Yunnan/BaoShan3/2007	Y280B	Y280B	TRUE
EPI_ISL_13761	A/chicken/Yunnan/Chuxiong1/2007	Y280B	Y280B	TRUE
EPI_ISL_13763	A/chicken/Yunnan/Chuxiong3/2007	Y280B	Y280B	TRUE
EPI_ISL_64342	A/chicken/Yunnan/Diqing/2006	Y280B	Y280B	TRUE
EPI_ISL_63468	A/chicken/Yunnan/Kunming/2007	Y280B	Y280B	TRUE
EPI_ISL_19170	A/chicken/Yunnan/qujing09/07	Y280B	Y280B	TRUE
EPI_ISL_63469	A/chicken/Yunnan/Wenshan/2007	Y280B	Y280B	TRUE
EPI_ISL_13771	A/chicken/Yunnan/Yuxi2/2007	Y280B	Y280B	TRUE
EPI_ISL_63470	A/chicken/Yunnan/Zhaotong/2007	Y280B	Y280B	TRUE
EPI_ISL_84548	A/chicken/Yunnanbn/411/2009	Y280B	Y280B	TRUE
EPI_ISL_84545	A/chicken/Yunnandh/101/2008	Y280B	Y280B	TRUE
EPI_ISL_89726	A/chicken/Zhejiang/FSQ/2011	Y280B	Y280B	TRUE
EPI_ISL_69437	A/chicken/Zhejiang/HE1/2009	Y280B	Y280B	TRUE
EPI_ISL_69432	A/chicken/Zhejiang/HF3/2009	Y280B	Y280B	TRUE
EPI_ISL_63471	A/chicken/Zhejiang/HJ/2007	Y280B	Y280B	TRUE
EPI_ISL_89738	A/chicken/Zhejiang/LAC/2011	Y280B	Y280B	TRUE
EPI_ISL_89651	A/chicken/Zhejiang/Q1D4/2010	Y280B	Y280B	TRUE
EPI_ISL_89653	A/chicken/Zhejiang/SJL/2009	Y280B	Y280B	TRUE
EPI_ISL_89737	A/chicken/Zhejiang/ZLB/2011	Y280B	Y280B	TRUE
EPI_ISL_7426	A/chukkar/Shantou/4635/2003	Y280B	Y280B	TRUE
EPI_ISL_7445	A/chukkar/Shantou/5866/2004	Y280B	Y280B	TRUE
EPI_ISL_9790	A/Ck/HK/WF126/2003	Y280B	Y280B	TRUE
EPI_ISL_9792	A/Ck/HK/YU463/2003	Y280B	Y280B	TRUE
EPI_ISL_9793	A/Ck/HK/YU577/2003	Y280B	Y280B	TRUE
EPI_ISL_97764	A/duck/Anhui/B13/2011	Y280B	Y280B	TRUE
EPI_ISL_97648	A/duck/Anhui/B24/2010	Y280B	Y280B	TRUE
EPI_ISL_69873	A/duck/China	Y280B	Y280B	TRUE
EPI_ISL_97760	A/duck/Chongqing/D23/2011	Y280B	Y280B	TRUE
EPI_ISL_83491	A/duck/Fujian/FQ107/2007	Y280B	Y280B	TRUE
EPI_ISL_100152	A/duck/Fujian/FQ2/2007	Y280B	Y280B	TRUE
EPI_ISL_69400	A/duck/Fujian/T14/2007	Y280B	Y280B	TRUE
EPI_ISL_69399	A/duck/Fujian/T7/2007	Y280B	Y280B	TRUE
EPI_ISL_69420	A/duck/Guangdong/810/2009	Y280B	Y280B	TRUE
EPI_ISL_97608	A/duck/Guangdong/G20/2010	Y280B	Y280B	TRUE
EPI_ISL_97604	A/duck/Guangdong/G24/2010	Y280B	Y280B	TRUE
EPI_ISL_84539	A/duck/Honghe/111/2009	Y280B	Y280B	TRUE
EPI_ISL_97526	A/duck/Hubei/F1/2010	Y280B	Y280B	TRUE
EPI_ISL_7400	A/duck/Shantou/3577/2003	Y280B	Y280B	TRUE
EPI_ISL_7395	A/duck/Shantou/4103/2002	Y280B	Y280B	TRUE
EPI_ISL_7404	A/duck/Shantou/515/2004	Y280B	Y280B	TRUE
EPI_ISL_7393	A/duck/Shantou/5753/2001	Y280B	Y280B	TRUE
EPI_ISL_34047	A/duck/Zhejiang/3/2002	Y280B	Y280B	TRUE
EPI_ISL_70190	A/environment/Hunan/1-81/2007	Y280B	Y280B	TRUE
EPI_ISL_70192	A/environment/Hunan/5-38/2007	Y280B	Y280B	TRUE
EPI_ISL_70193	A/feces/Hunan/2-28/2007	Y280B	Y280B	TRUE
EPI_ISL_70194	A/feces/Hunan/3-91/2007	Y280B	Y280B	TRUE
EPI_ISL_9796	A/Gf/HK/NT101/2003	Y280B	Y280B	TRUE
EPI_ISL_97759	A/goose/Jilin/K5/2011	Y280B	Y280B	TRUE
EPI_ISL_19166	A/goose/Yunnan/chuxiong07/07	Y280B	Y280B	TRUE
EPI_ISL_7398	A/Guinea_fowl/Shantou/1677/2000	Y280B	Y280B	TRUE
EPI_ISL_69735	A/Hong_Kong/3239/2008	Y280B	Y280B	TRUE
EPI_ISL_7413	A/partridge/Shantou/2803/2003	Y280B	Y280B	TRUE
EPI_ISL_7414	A/partridge/Shantou/3487/2003	Y280B	Y280B	TRUE
EPI_ISL_7299	A/partridge/Shantou/3720/2001	Y280B	Y280B	TRUE
EPI_ISL_7408	A/partridge/Shantou/4525/2002	Y280B	Y280B	TRUE
EPI_ISL_7332	A/partridge/Shantou/49/2002	Y280B	Y280B	TRUE
EPI_ISL_7449	A/partridge/Shantou/5692/2000	Y280B	Y280B	TRUE
EPI_ISL_7460	A/partridge/Shantou/645/2001	Y280B	Y280B	TRUE
EPI_ISL_7455	A/partridge/Shantou/7075/2004	Y280B	Y280B	TRUE
EPI_ISL_4464	A/pheasant/HongKong/WF54/03	Y280B	Y280B	TRUE
EPI_ISL_7462	A/pheasant/Shantou/111/2005	Y280B	Y280B	TRUE
EPI_ISL_7417	A/pheasant/Shantou/3716/2003	Y280B	Y280B	TRUE
EPI_ISL_7423	A/pheasant/Shantou/4340/2003	Y280B	Y280B	TRUE
EPI_ISL_7452	A/pheasant/Shantou/6607/2004	Y280B	Y280B	TRUE
EPI_ISL_3185	A/Pigeon/Nanchang/2-0461/2000	Y280B	Y280B	TRUE
EPI_ISL_2244	A/quail/Shanghai/8/96	Y280B	Y280B	TRUE
EPI_ISL_11273	A/quail/Shantou/1820/2000	Y280B	Y280B	TRUE
EPI_ISL_11332	A/quail/Shantou/2200/2005	Y280B	Y280B	TRUE
EPI_ISL_11309	A/quail/Shantou/2615/2003	Y280B	Y280B	TRUE
EPI_ISL_11315	A/quail/Shantou/3856/2003	Y280B	Y280B	TRUE
EPI_ISL_11316	A/quail/Shantou/4038/2003	Y280B	Y280B	TRUE
EPI_ISL_11331	A/quail/Shantou/493/2005	Y280B	Y280B	TRUE
EPI_ISL_11291	A/quail/Shantou/5675/2001	Y280B	Y280B	TRUE
EPI_ISL_11325	A/quail/Shantou/6046/2004	Y280B	Y280B	TRUE
EPI_ISL_11327	A/quail/Shantou/6794/2004	Y280B	Y280B	TRUE
EPI_ISL_11328	A/quail/Shantou/7397/2004	Y280B	Y280B	TRUE
EPI_ISL_11335	A/quail/Shantou/8993/2005	Y280B	Y280B	TRUE
EPI_ISL_9794	A/SCk/HK/YU663/2003	Y280B	Y280B	TRUE
EPI_ISL_3044	A/Shaoguan/408/98	Y280B	Y280B	TRUE
EPI_ISL_3045	A/Shaoguan/447/98	Y280B	Y280B	TRUE
EPI_ISL_7330	A/silky_chicken/Shantou/1169/2005	Y280B	Y280B	TRUE
EPI_ISL_7478	A/silky_chicken/Shantou/1818/2000	Y280B	Y280B	TRUE
EPI_ISL_7314	A/silky_chicken/Shantou/1826/2004	Y280B	Y280B	TRUE
EPI_ISL_7331	A/silky_chicken/Shantou/2131/2005	Y280B	Y280B	TRUE
EPI_ISL_7486	A/silky_chicken/Shantou/2619/2001	Y280B	Y280B	TRUE
EPI_ISL_7329	A/silky_chicken/Shantou/459/2005	Y280B	Y280B	TRUE
EPI_ISL_7326	A/silky_chicken/Shantou/7790/2004	Y280B	Y280B	TRUE
EPI_ISL_70610	A/sparrow/Guangxi/11/2005	Y280B	Y280B	TRUE
EPI_ISL_70611	A/sparrow/Guangxi/31/2006	Y280B	Y280B	TRUE
EPI_ISL_81610	A/swine/Guangxi/9/2007	Y280B	Y280B	TRUE
EPI_ISL_10591	A/swine/Henan/8/2004	Y280B	Y280B	TRUE
EPI_ISL_84439	A/swine/Taizhou/5/2008	Y280B	Y280B	TRUE
EPI_ISL_84440	A/swine/Yangzhou/1/2008	Y280B	Y280B	TRUE

## Sheet: HA1-2
Accession	Strain	Annotation	Prediction	Correct
EPI_ISL_1279	A/goose/Minnesota/5733/80	MN5733	DB277	FALSE
EPI_ISL_85214	A/northern_shoveler/Interior_Alaska/8BM3470/2008	MN5733	HK448	FALSE
EPI_ISL_23347	A/turkey/TX/4-1-81/1981	MN5733	DB277	FALSE
EPI_ISL_2238	A/chicken/Ningxia/5/99	Y280_G9	Chk_Bei	FALSE
EPI_ISL_67372	A/chicken/Henan/1/2003	Y280B	Y280-like	FALSE
EPI_ISL_7377	A/chicken/Hunan/4246/2005	Chk_Bei	Chk_Bei	TRUE
EPI_ISL_7324	A/chicken/Shantou/6786/2004	Chk_Bei	Chk_Bei	TRUE
EPI_ISL_7412	A/chukkar/Shantou/1039/2003	Chk_Bei	Chk_Bei	TRUE
EPI_ISL_7437	A/chukkar/Shantou/1447/2004	Chk_Bei	Chk_Bei	TRUE
EPI_ISL_7365	A/chukkar/Shantou/465/2002	Chk_Bei	Chk_Bei	TRUE
EPI_ISL_7376	A/chukkar/Shantou/469/2002	Chk_Bei	Chk_Bei	TRUE
EPI_ISL_7451	A/chukkar/Shantou/6571/2004	Chk_Bei	Chk_Bei	TRUE
EPI_ISL_9788	A/Gf/HK/SSP607/2003	Chk_Bei	Chk_Bei	TRUE
EPI_ISL_7463	A/Guinea_fowl/Shantou/630/2005	Chk_Bei	Chk_Bei	TRUE
EPI_ISL_4465	A/guineafowl/HongKong/NT184/03	Chk_Bei	Chk_Bei	TRUE
EPI_ISL_9786	A/HK/2108/2003	Chk_Bei	Chk_Bei	TRUE
EPI_ISL_7416	A/partridge/Shantou/1800/2000	Chk_Bei	Chk_Bei	TRUE
EPI_ISL_7469	A/partridge/Shantou/22102/2005	Chk_Bei	Chk_Bei	TRUE
EPI_ISL_7430	A/partridge/Shantou/25/2004	Chk_Bei	Chk_Bei	TRUE
EPI_ISL_7354	A/partridge/Shantou/354/2002	Chk_Bei	Chk_Bei	TRUE
EPI_ISL_7407	A/partridge/Shantou/3811/2002	Chk_Bei	Chk_Bei	TRUE
EPI_ISL_7310	A/partridge/Shantou/4541/2001	Chk_Bei	Chk_Bei	TRUE
EPI_ISL_7321	A/partridge/Shantou/4829/2001	Chk_Bei	Chk_Bei	TRUE
EPI_ISL_7429	A/partridge/Shantou/4889/2003	Chk_Bei	Chk_Bei	TRUE
EPI_ISL_7457	A/partridge/Shantou/7343/2004	Chk_Bei	Chk_Bei	TRUE
EPI_ISL_7428	A/pheasant/Shantou/4709/2003	Chk_Bei	Chk_Bei	TRUE
EPI_ISL_7458	A/pheasant/Shantou/7501/2004	Chk_Bei	Chk_Bei	TRUE
EPI_ISL_7435	A/pheasant/Shantou/841/2004	Chk_Bei	Chk_Bei	TRUE
EPI_ISL_11297	A/quail/Shantou/1038/2002	Chk_Bei	Chk_Bei	TRUE
EPI_ISL_11305	A/quail/Shantou/1140/2003	Chk_Bei	Chk_Bei	TRUE
EPI_ISL_11272	A/quail/Shantou/1318/2000	Chk_Bei	Chk_Bei	TRUE
EPI_ISL_11338	A/quail/Shantou/15892/2005	Chk_Bei	Chk_Bei	TRUE
EPI_ISL_11306	A/quail/Shantou/1780/2003	Chk_Bei	Chk_Bei	TRUE
EPI_ISL_11307	A/quail/Shantou/1978/2003	Chk_Bei	Chk_Bei	TRUE
EPI_ISL_11269	A/quail/Shantou/243/2000	Chk_Bei	Chk_Bei	TRUE
EPI_ISL_11308	A/quail/Shantou/2608/2003	Chk_Bei	Chk_Bei	TRUE
EPI_ISL_11313	A/quail/Shantou/3700/2003	Chk_Bei	Chk_Bei	TRUE
EPI_ISL_11287	A/quail/Shantou/4179/2001	Chk_Bei	Chk_Bei	TRUE
EPI_ISL_11289	A/quail/Shantou/4762/2001	Chk_Bei	Chk_Bei	TRUE
EPI_ISL_11319	A/quail/Shantou/5/2004	Chk_Bei	Chk_Bei	TRUE
EPI_ISL_77913	A/thick-billed_murre/Alaska/44085-155/2006	DB277	DB277	TRUE
EPI_ISL_7470	A/chukkar/Shantou/22116/2005	G1_Asia	G1_Asia	TRUE
EPI_ISL_66541	A/ferret/Maryland/P10-UMD/2008	G1_Asia	G1_Asia	TRUE
EPI_ISL_3215	A/guinea_fowl/Hong_Kong/WF10/99	G1_Asia	G1_Asia	TRUE
EPI_ISL_7471	A/Guinea_fowl/Shantou/2076/2001	G1_Asia	G1_Asia	TRUE
EPI_ISL_69733	A/Hong_Kong/33982/2009	G1_Asia	G1_Asia	TRUE
EPI_ISL_7288	A/partridge/Shantou/2875/2001	G1_Asia	G1_Asia	TRUE
EPI_ISL_11336	A/quail/Shantou/11195/2005	G1_Asia	G1_Asia	TRUE
EPI_ISL_11280	A/quail/Shantou/1242/2001	G1_Asia	G1_Asia	TRUE
EPI_ISL_11271	A/quail/Shantou/1310/2000	G1_Asia	G1_Asia	TRUE
EPI_ISL_11337	A/quail/Shantou/13425/2005	G1_Asia	G1_Asia	TRUE
EPI_ISL_11298	A/quail/Shantou/1551/2002	G1_Asia	G1_Asia	TRUE
EPI_ISL_11339	A/quail/Shantou/19506/2005	G1_Asia	G1_Asia	TRUE
EPI_ISL_11341	A/quail/Shantou/21605/2005	G1_Asia	G1_Asia	TRUE
EPI_ISL_11303	A/quail/Shantou/308/2003	G1_Asia	G1_Asia	TRUE
EPI_ISL_11314	A/quail/Shantou/3768/2003	G1_Asia	G1_Asia	TRUE
EPI_ISL_11299	A/quail/Shantou/3851/2002	G1_Asia	G1_Asia	TRUE
EPI_ISL_11317	A/quail/Shantou/4044/2003	G1_Asia	G1_Asia	TRUE
EPI_ISL_11288	A/quail/Shantou/4641/2001	G1_Asia	G1_Asia	TRUE
EPI_ISL_11318	A/quail/Shantou/4850/2003	G1_Asia	G1_Asia	TRUE
EPI_ISL_63454	A/chicken/Israel/114/2007	G1_Mideast_A	G1_Mideast_A	TRUE
EPI_ISL_19621	A/chicken/Israel/178/2006	G1_Mideast_A	G1_Mideast_A	TRUE
EPI_ISL_10376	A/chicken/Israel/1953/2004	G1_Mideast_A	G1_Mideast_A	TRUE
EPI_ISL_19622	A/chicken/Israel/282/2005	G1_Mideast_A	G1_Mideast_A	TRUE
EPI_ISL_30443	A/chicken/Israel/375/2007	G1_Mideast_A	G1_Mideast_A	TRUE
EPI_ISL_19627	A/chicken/Israel/853/2005	G1_Mideast_A	G1_Mideast_A	TRUE
EPI_ISL_85779	A/chicken/Jordan/09vir579-2/2007	G1_Mideast_A	G1_Mideast_A	TRUE
EPI_ISL_85772	A/chicken/Jordan/1436-1451/2004	G1_Mideast_A	G1_Mideast_A	TRUE
EPI_ISL_85774	A/chicken/Jordan/1436-643/2004	G1_Mideast_A	G1_Mideast_A	TRUE
EPI_ISL_4535	A/ostrich/Eshkol/1436/03	G1_Mideast_A	G1_Mideast_A	TRUE
EPI_ISL_10375	A/turkey/Israel/1209/2003	G1_Mideast_A	G1_Mideast_A	TRUE
EPI_ISL_19623	A/turkey/Israel/425/2005	G1_Mideast_A	G1_Mideast_A	TRUE
EPI_ISL_10373	A/turkey/Israel/810/2001	G1_Mideast_A	G1_Mideast_A	TRUE
EPI_ISL_19628	A/turkey/Israel/884/2005	G1_Mideast_A	G1_Mideast_A	TRUE
EPI_ISL_62976	A/avian/Israel/313/2008	G1_Mideast_B	G1_Mideast_B	TRUE
EPI_ISL_80922	A/avian/Saudi_Arabia/910135/2006	G1_Mideast_B	G1_Mideast_B	TRUE
EPI_ISL_63781	A/chicken/Afghanistan/329-2vir09-AFG-Khost1/2008	G1_Mideast_B	G1_Mideast_B	TRUE
EPI_ISL_63782	A/chicken/Afghanistan/329-3vir09-AFG-Khost2/2008	G1_Mideast_B	G1_Mideast_B	TRUE
EPI_ISL_63784	A/chicken/Afghanistan/329-5vir09-AFG-Khost4/2008	G1_Mideast_B	G1_Mideast_B	TRUE
EPI_ISL_63785	A/chicken/Afghanistan/329-6vir09-AFG-Khost9/2008	G1_Mideast_B	G1_Mideast_B	TRUE
EPI_ISL_63787	A/chicken/Afghanistan/329-8vir09-AFG-Heart7/2009	G1_Mideast_B	G1_Mideast_B	TRUE
EPI_ISL_78703	A/chicken/Chandigarh/2048/2003	G1_Mideast_B	G1_Mideast_B	TRUE
EPI_ISL_85790	A/chicken/Dubai/09vir3771-3/2008	G1_Mideast_B	G1_Mideast_B	TRUE
EPI_ISL_78704	A/chicken/Gujarat/3697/2004	G1_Mideast_B	G1_Mideast_B	TRUE
EPI_ISL_27600	A/chicken/Haryana/2051/2003	G1_Mideast_B	G1_Mideast_B	TRUE
EPI_ISL_97221	A/chicken/India/IVRI-0004/2010	G1_Mideast_B	G1_Mideast_B	TRUE
EPI_ISL_97215	A/chicken/India/IVRI-0011/2011	G1_Mideast_B	G1_Mideast_B	TRUE
EPI_ISL_85792	A/chicken/Iran/10VIR854-3/2009	G1_Mideast_B	G1_Mideast_B	TRUE
EPI_ISL_85794	A/chicken/Iran/10VIR854-4/2009	G1_Mideast_B	G1_Mideast_B	TRUE
EPI_ISL_85791	A/chicken/Iran/10VIR854-5/2008	G1_Mideast_B	G1_Mideast_B	TRUE
EPI_ISL_65650	A/chicken/Iran/133/2004	G1_Mideast_B	G1_Mideast_B	TRUE
EPI_ISL_67377	A/chicken/Iran/320/2003	G1_Mideast_B	G1_Mideast_B	TRUE
EPI_ISL_64312	A/chicken/Iran/68/2006	G1_Mideast_B	G1_Mideast_B	TRUE
EPI_ISL_11180	A/chicken/Iran/B308B/2004	G1_Mideast_B	G1_Mideast_B	TRUE
EPI_ISL_97042	A/chicken/Iran/EBGV-88/2010	G1_Mideast_B	G1_Mideast_B	TRUE
EPI_ISL_10545	A/chicken/Iran/L248/03	G1_Mideast_B	G1_Mideast_B	TRUE
EPI_ISL_63003	A/chicken/Iran/RZ28/2008	G1_Mideast_B	G1_Mideast_B	TRUE
EPI_ISL_63007	A/chicken/Iran/RZ53/2008	G1_Mideast_B	G1_Mideast_B	TRUE
EPI_ISL_63444	A/chicken/Iran/SH2/2007	G1_Mideast_B	G1_Mideast_B	TRUE
EPI_ISL_15732	A/chicken/Iran/TH186/2007	G1_Mideast_B	G1_Mideast_B	TRUE
EPI_ISL_15730	A/chicken/Iran/TH286/2007	G1_Mideast_B	G1_Mideast_B	TRUE
EPI_ISL_15731	A/chicken/Iran/TH386/2007	G1_Mideast_B	G1_Mideast_B	TRUE
EPI_ISL_15729	A/chicken/Iran/TH85/2007	G1_Mideast_B	G1_Mideast_B	TRUE
EPI_ISL_63446	A/chicken/Iran/THLBM862/2007	G1_Mideast_B	G1_Mideast_B	TRUE
EPI_ISL_63447	A/chicken/Iran/THLBM863/2007	G1_Mideast_B	G1_Mideast_B	TRUE
EPI_ISL_63450	A/chicken/Iran/THLBM866/2007	G1_Mideast_B	G1_Mideast_B	TRUE
EPI_ISL_63452	A/chicken/Iran/THLBM868/2007	G1_Mideast_B	G1_Mideast_B	TRUE
EPI_ISL_63453	A/chicken/Israel/1033/2007	G1_Mideast_B	G1_Mideast_B	TRUE
EPI_ISL_30437	A/chicken/Israel/1040/2007	G1_Mideast_B	G1_Mideast_B	TRUE
EPI_ISL_30439	A/chicken/Israel/182/2008	G1_Mideast_B	G1_Mideast_B	TRUE
EPI_ISL_30440	A/chicken/Israel/184/2009	G1_Mideast_B	G1_Mideast_B	TRUE
EPI_ISL_63455	A/chicken/Israel/215/2007	G1_Mideast_B	G1_Mideast_B	TRUE
EPI_ISL_63457	A/chicken/Israel/402/2007	G1_Mideast_B	G1_Mideast_B	TRUE
EPI_ISL_63458	A/chicken/Israel/449/2007	G1_Mideast_B	G1_Mideast_B	TRUE
EPI_ISL_63009	A/chicken/Israel/524/2008	G1_Mideast_B	G1_Mideast_B	TRUE
EPI_ISL_30445	A/chicken/Israel/694/2008	G1_Mideast_B	G1_Mideast_B	TRUE
EPI_ISL_30446	A/chicken/Israel/702/2008	G1_Mideast_B	G1_Mideast_B	TRUE
EPI_ISL_63459	A/chicken/Israel/728/2007	G1_Mideast_B	G1_Mideast_B	TRUE
EPI_ISL_30447	A/chicken/Israel/869/2007	G1_Mideast_B	G1_Mideast_B	TRUE
EPI_ISL_30448	A/chicken/Israel/883/2008	G1_Mideast_B	G1_Mideast_B	TRUE
EPI_ISL_63460	A/chicken/Israel/933/2007	G1_Mideast_B	G1_Mideast_B	TRUE
EPI_ISL_30449	A/chicken/Israel/951/2007	G1_Mideast_B	G1_Mideast_B	TRUE
EPI_ISL_85776	A/chicken/Jordan/436-1/2010	G1_Mideast_B	G1_Mideast_B	TRUE
EPI_ISL_85777	A/chicken/Jordan/436-2/2010	G1_Mideast_B	G1_Mideast_B	TRUE
EPI_ISL_85796	A/chicken/Kurdistan/4693-9/2009	G1_Mideast_B	G1_Mideast_B	TRUE
EPI_ISL_78706	A/chicken/Orissa/2317/2004	G1_Mideast_B	G1_Mideast_B	TRUE
EPI_ISL_29787	A/chicken/Pakistan/UDL-01/2005	G1_Mideast_B	G1_Mideast_B	TRUE
EPI_ISL_29789	A/chicken/Pakistan/UDL-01/2006	G1_Mideast_B	G1_Mideast_B	TRUE
EPI_ISL_29793	A/chicken/Pakistan/UDL-01/2008	G1_Mideast_B	G1_Mideast_B	TRUE
EPI_ISL_29788	A/chicken/Pakistan/UDL-02/2005	G1_Mideast_B	G1_Mideast_B	TRUE
EPI_ISL_29790	A/chicken/Pakistan/UDL-02/2006	G1_Mideast_B	G1_Mideast_B	TRUE
EPI_ISL_29794	A/chicken/Pakistan/UDL-02/2008	G1_Mideast_B	G1_Mideast_B	TRUE
EPI_ISL_29786	A/chicken/Pakistan/UDL-04/2006	G1_Mideast_B	G1_Mideast_B	TRUE
EPI_ISL_29796	A/chicken/Pakistan/UDL-04/2007	G1_Mideast_B	G1_Mideast_B	TRUE
EPI_ISL_27601	A/chicken/Punjab/2063/2003	G1_Mideast_B	G1_Mideast_B	TRUE
EPI_ISL_85798	A/chicken/Qatar/4576-4/2008	G1_Mideast_B	G1_Mideast_B	TRUE
EPI_ISL_85780	A/chicken/Saudi_Arabia/08vir3489-33-as638/2005	G1_Mideast_B	G1_Mideast_B	TRUE
EPI_ISL_85781	A/chicken/Saudi_Arabia/08vir3489-38-as92/2005	G1_Mideast_B	G1_Mideast_B	TRUE
EPI_ISL_85782	A/chicken/Saudi_Arabia/08vir3489-44-as253/2006	G1_Mideast_B	G1_Mideast_B	TRUE
EPI_ISL_85786	A/chicken/Saudi_Arabia/08vir3489-47-as215/2007	G1_Mideast_B	G1_Mideast_B	TRUE
EPI_ISL_85788	A/chicken/Saudi_Arabia/08vir3489-50-as118/2008	G1_Mideast_B	G1_Mideast_B	TRUE
EPI_ISL_83300	A/chicken/Tripura/105131/2008	G1_Mideast_B	G1_Mideast_B	TRUE
EPI_ISL_76225	A/chicken/Uchal/8286/2006	G1_Mideast_B	G1_Mideast_B	TRUE
EPI_ISL_76224	A/chicken/Uchal/8293/2006	G1_Mideast_B	G1_Mideast_B	TRUE
EPI_ISL_78707	A/chicken/Uttar_Pradesh/2544/2004	G1_Mideast_B	G1_Mideast_B	TRUE
EPI_ISL_85784	A/falcon/Saudi_Arabia/08vir3489-40-as977/2006	G1_Mideast_B	G1_Mideast_B	TRUE
EPI_ISL_93285	A/quail/Lebanon/272/2010	G1_Mideast_B	G1_Mideast_B	TRUE
EPI_ISL_64478	A/turkey/Israel/1608/2006	G1_Mideast_B	G1_Mideast_B	TRUE
EPI_ISL_30444	A/turkey/Israel/689/2008	G1_Mideast_B	G1_Mideast_B	TRUE
EPI_ISL_69121	A/watercoot/Haryana/5844/2005	G1_Mideast_B	G1_Mideast_B	TRUE
EPI_ISL_85793	A/chicken/Iran/10VIR854-1/2002	G1_Mideast_D	G1_Mideast_D	TRUE
EPI_ISL_64828	A/chicken/Iran/119/2005	G1_Mideast_D	G1_Mideast_D	TRUE
EPI_ISL_65651	A/chicken/Iran/152/2004	G1_Mideast_D	G1_Mideast_D	TRUE
EPI_ISL_68019	A/chicken/Iran/233/2001	G1_Mideast_D	G1_Mideast_D	TRUE
EPI_ISL_68363	A/chicken/Iran/565/2000	G1_Mideast_D	G1_Mideast_D	TRUE
EPI_ISL_68364	A/chicken/Iran/584/2000	G1_Mideast_D	G1_Mideast_D	TRUE
EPI_ISL_68591	A/chicken/Iran/661/1998	G1_Mideast_D	G1_Mideast_D	TRUE
EPI_ISL_68496	A/chicken/Iran/705/1999	G1_Mideast_D	G1_Mideast_D	TRUE
EPI_ISL_64829	A/chicken/Iran/86/2005	G1_Mideast_D	G1_Mideast_D	TRUE
EPI_ISL_11179	A/chicken/Iran/B308A/2004	G1_Mideast_D	G1_Mideast_D	TRUE
EPI_ISL_11178	A/chicken/Iran/B314/2003	G1_Mideast_D	G1_Mideast_D	TRUE
EPI_ISL_15734	A/chicken/Iran/TH78/1999	G1_Mideast_D	G1_Mideast_D	TRUE
EPI_ISL_15736	A/chicken/Iran/TH80/2000	G1_Mideast_D	G1_Mideast_D	TRUE
EPI_ISL_128	A/parakeet/Narita/92A/98	G1_Mideast_D	G1_Mideast_D	TRUE
EPI_ISL_2909	A/shovelar/Iran/G54/03	G1_Mideast_D	G1_Mideast_D	TRUE
EPI_ISL_10141	A/chicken/Cheongju/ADL0401/2004	KR38349	KR38349	TRUE
EPI_ISL_13845	A/chicken/Korea/01310/2001	KR38349	KR38349	TRUE
EPI_ISL_1275	A/chicken/Korea/25232-96006/96	KR38349	KR38349	TRUE
EPI_ISL_1274	A/chicken/Korea/38349-p96323/96	KR38349	KR38349	TRUE
EPI_ISL_77209	A/chicken/Korea/A170/2009	KR38349	KR38349	TRUE
EPI_ISL_70424	A/chicken/Korea/ADL050895/2005	KR38349	KR38349	TRUE
EPI_ISL_70426	A/chicken/Korea/ADL060162/2006	KR38349	KR38349	TRUE
EPI_ISL_70427	A/chicken/Korea/ADL060168/2006	KR38349	KR38349	TRUE
EPI_ISL_70428	A/chicken/Korea/ADL060196/2006	KR38349	KR38349	TRUE
EPI_ISL_70429	A/chicken/Korea/ADL060580/2006	KR38349	KR38349	TRUE
EPI_ISL_70439	A/chicken/Korea/ADL060831/2006	KR38349	KR38349	TRUE
EPI_ISL_70430	A/chicken/Korea/ADL060845/2006	KR38349	KR38349	TRUE
EPI_ISL_70431	A/chicken/Korea/ADL060865/2006	KR38349	KR38349	TRUE
EPI_ISL_70432	A/chicken/Korea/ADL062128/2006	KR38349	KR38349	TRUE
EPI_ISL_70436	A/chicken/Korea/ADL070801/2007	KR38349	KR38349	TRUE
EPI_ISL_68688	A/chicken/Korea/AI-96004/1996	KR38349	KR38349	TRUE
EPI_ISL_84582	A/chicken/Korea/HC09/2009	KR38349	KR38349	TRUE
EPI_ISL_9886	A/chicken/Korea/S21/04	KR38349	KR38349	TRUE
EPI_ISL_4668	A/chicken/Korea/S4/03	KR38349	KR38349	TRUE
EPI_ISL_84581	A/chicken/Korea/SH0802/2008	KR38349	KR38349	TRUE
EPI_ISL_84583	A/chicken/Korea/SH0902/2009	KR38349	KR38349	TRUE
EPI_ISL_84584	A/chicken/Korea/SH0903/2009	KR38349	KR38349	TRUE
EPI_ISL_84587	A/chicken/Korea/SH0906/2009	KR38349	KR38349	TRUE
EPI_ISL_84594	A/chicken/Korea/SH0913/2009	KR38349	KR38349	TRUE
EPI_ISL_77207	A/duck/Korea/A174/2009	KR38349	KR38349	TRUE
EPI_ISL_98907	A/duck/Korea/KNUDPJ09/2009	KR38349	KR38349	TRUE
EPI_ISL_4671	A/duck/Korea/S13/03	KR38349	KR38349	TRUE
EPI_ISL_84585	A/duck/Korea/SH0904/2009	KR38349	KR38349	TRUE
EPI_ISL_84593	A/duck/Korea/SH0912/2009	KR38349	KR38349	TRUE
EPI_ISL_84596	A/duck/Korea/SH0915/2009	KR38349	KR38349	TRUE
EPI_ISL_12597	A/Korea/KBNP-0028/2000	KR38349	KR38349	TRUE
EPI_ISL_4617	A/swine/Korea/S452/2004	KR38349	KR38349	TRUE
EPI_ISL_5800	A/laughing_gull/Delaware/2718/1987	MN5733	MN5733	TRUE
EPI_ISL_4067	A/mallard/Alberta/11/91	MN5733	MN5733	TRUE
EPI_ISL_4047	A/mallard/Alberta/743/83	MN5733	MN5733	TRUE
EPI_ISL_8883	A/mallard_duck/ALB/321/1988	MN5733	MN5733	TRUE
EPI_ISL_99499	A/ruddy_turnstone/Delaware_Bay/2774/1987	MN5733	MN5733	TRUE
EPI_ISL_99486	A/ruddy_turnstone/Virginia/2297/1988	MN5733	MN5733	TRUE
EPI_ISL_30815	A/laughing_gull/Delaware/12/2006	SB261	SB261	TRUE
EPI_ISL_99339	A/laughing_gull/Delaware_Bay/5/2003	SB261	SB261	TRUE
EPI_ISL_84624	A/shorebird/Delaware/554/2007	SB261	SB261	TRUE
EPI_ISL_94965	A/black_swan/Morpeth/194/2008	VN340	VN340	TRUE
EPI_ISL_247	A/duck/Hokkaido/13/00	VN340	VN340	TRUE
EPI_ISL_28844	A/duck/Hokkaido/238/2008	VN340	VN340	TRUE
EPI_ISL_245	A/duck/Hokkaido/9/99	VN340	VN340	TRUE
EPI_ISL_67395	A/duck/Mongolia/564/2003	VN340	VN340	TRUE
EPI_ISL_11897	A/duck/Viet_Nam/340/2001	VN340	VN340	TRUE
EPI_ISL_11896	A/duck/Viet_Nam/68/2001	VN340	VN340	TRUE
EPI_ISL_94952	A/eastern_curlew/Stockton/4204/2008	VN340	VN340	TRUE
EPI_ISL_33856	A/gadwall/Netherlands/1/2006	VN340	VN340	TRUE
EPI_ISL_98893	A/mallard/France/090360/2009	VN340	VN340	TRUE
EPI_ISL_86201	A/mallard/Iran/T366/2007	VN340	VN340	TRUE
EPI_ISL_86202	A/mallard/Iran/T370/2007	VN340	VN340	TRUE
EPI_ISL_77452	A/mallard/PT/27972-B139/2007	VN340	VN340	TRUE
EPI_ISL_63562	A/mallard/Switzerland/WV1070805/2007	VN340	VN340	TRUE
EPI_ISL_63563	A/mallard/Switzerland/WV3080008/2007	VN340	VN340	TRUE
EPI_ISL_1488	A/ostrich/South_Africa/9508103/95	VN340	VN340	TRUE
EPI_ISL_97757	A/chicken/Anhui/A21-2/2011	Y280_Fuj_SL6	Y280_Fuj_SL6	TRUE
EPI_ISL_97658	A/chicken/Guangdong/265/2011	Y280_Fuj_SL6	Y280_Fuj_SL6	TRUE
EPI_ISL_97659	A/chicken/Guangdong/283/2011	Y280_Fuj_SL6	Y280_Fuj_SL6	TRUE
EPI_ISL_89735	A/chicken/Guangdong/CJZ/2011	Y280_Fuj_SL6	Y280_Fuj_SL6	TRUE
EPI_ISL_99612	A/chicken/Guangdong/FJC07/2011	Y280_Fuj_SL6	Y280_Fuj_SL6	TRUE
EPI_ISL_89745	A/chicken/Guangdong/FLS/2011	Y280_Fuj_SL6	Y280_Fuj_SL6	TRUE
EPI_ISL_89721	A/chicken/Guangdong/FZH/2011	Y280_Fuj_SL6	Y280_Fuj_SL6	TRUE
EPI_ISL_89748	A/chicken/Guangdong/HBQ/2011	Y280_Fuj_SL6	Y280_Fuj_SL6	TRUE
EPI_ISL_99607	A/chicken/Guangdong/HMZ11/2011	Y280_Fuj_SL6	Y280_Fuj_SL6	TRUE
EPI_ISL_89744	A/chicken/Guangdong/HYF/2011	Y280_Fuj_SL6	Y280_Fuj_SL6	TRUE
EPI_ISL_89718	A/chicken/Guangdong/LHY/2011	Y280_Fuj_SL6	Y280_Fuj_SL6	TRUE
EPI_ISL_89739	A/chicken/Guangdong/LJD/2011	Y280_Fuj_SL6	Y280_Fuj_SL6	TRUE
EPI_ISL_89743	A/chicken/Guangdong/LJH/2011	Y280_Fuj_SL6	Y280_Fuj_SL6	TRUE
EPI_ISL_89717	A/chicken/Guangdong/LSD/2011	Y280_Fuj_SL6	Y280_Fuj_SL6	TRUE
EPI_ISL_89725	A/chicken/Guangdong/LYQ/2011	Y280_Fuj_SL6	Y280_Fuj_SL6	TRUE
EPI_ISL_99608	A/chicken/Guangdong/SQL11/2011	Y280_Fuj_SL6	Y280_Fuj_SL6	TRUE
EPI_ISL_89720	A/chicken/Guangdong/WGH/2011	Y280_Fuj_SL6	Y280_Fuj_SL6	TRUE
EPI_ISL_89731	A/chicken/Guangdong/YJX/2011	Y280_Fuj_SL6	Y280_Fuj_SL6	TRUE
EPI_ISL_98866	A/chicken/Guangdong/ZCY/2011	Y280_Fuj_SL6	Y280_Fuj_SL6	TRUE
EPI_ISL_98865	A/chicken/Guangdong/ZHJ/2011	Y280_Fuj_SL6	Y280_Fuj_SL6	TRUE
EPI_ISL_89728	A/chicken/Guangdong/ZPY/2011	Y280_Fuj_SL6	Y280_Fuj_SL6	TRUE
EPI_ISL_99609	A/chicken/Guangxi/QCR10/2011	Y280_Fuj_SL6	Y280_Fuj_SL6	TRUE
EPI_ISL_98010	A/chicken/Guizhou/G17/2011	Y280_Fuj_SL6	Y280_Fuj_SL6	TRUE
EPI_ISL_98009	A/chicken/Guizhou/G22/2011	Y280_Fuj_SL6	Y280_Fuj_SL6	TRUE
EPI_ISL_99611	A/chicken/Guizhou/LCY09/2011	Y280_Fuj_SL6	Y280_Fuj_SL6	TRUE
EPI_ISL_97999	A/chicken/Hainan/I28/2011	Y280_Fuj_SL6	Y280_Fuj_SL6	TRUE
EPI_ISL_97998	A/chicken/Hainan/I7/2011	Y280_Fuj_SL6	Y280_Fuj_SL6	TRUE
EPI_ISL_97688	A/chicken/Ningxia/181/2011	Y280_Fuj_SL6	Y280_Fuj_SL6	TRUE
EPI_ISL_13015	A/bird/Guangxi/63/2005	Y280_G9	Y280_G9	TRUE
EPI_ISL_13017	A/bird/Guangxi/83/2005	Y280_G9	Y280_G9	TRUE
EPI_ISL_84317	A/chicken/Anhui/2h/2002	Y280_G9	Y280_G9	TRUE
EPI_ISL_3446	A/chicken/Beijing/1/00	Y280_G9	Y280_G9	TRUE
EPI_ISL_2441	A/chicken/Beijing/3/99	Y280_G9	Y280_G9	TRUE
EPI_ISL_68494	A/chicken/Beijing/ne/1999	Y280_G9	Y280_G9	TRUE
EPI_ISL_67717	A/chicken/Beijing/nl/2002	Y280_G9	Y280_G9	TRUE
EPI_ISL_24717	A/chicken/Fujian/2/2002	Y280_G9	Y280_G9	TRUE
EPI_ISL_8494	A/chicken/Fujian/25/00	Y280_G9	Y280_G9	TRUE
EPI_ISL_2234	A/chicken/Guangdong/11/97	Y280_G9	Y280_G9	TRUE
EPI_ISL_24721	A/chicken/Guangdong/16/1999	Y280_G9	Y280_G9	TRUE
EPI_ISL_8498	A/chicken/Guangdong/5/97	Y280_G9	Y280_G9	TRUE
EPI_ISL_8500	A/chicken/Guangdong/6/97	Y280_G9	Y280_G9	TRUE
EPI_ISL_68726	A/chicken/Guangdong/SS/94	Y280_G9	Y280_G9	TRUE
EPI_ISL_70608	A/chicken/Guangxi/101/2006	Y280_G9	Y280_G9	TRUE
EPI_ISL_70604	A/chicken/Guangxi/17/2007	Y280_G9	Y280_G9	TRUE
EPI_ISL_7366	A/chicken/Guangxi/187/2005	Y280_G9	Y280_G9	TRUE
EPI_ISL_7370	A/chicken/Guangxi/2389/2005	Y280_G9	Y280_G9	TRUE
EPI_ISL_13010	A/chicken/Guangxi/37/2005	Y280_G9	Y280_G9	TRUE
EPI_ISL_70606	A/chicken/Guangxi/39/2007	Y280_G9	Y280_G9	TRUE
EPI_ISL_8502	A/chicken/Guangxi/9/99	Y280_G9	Y280_G9	TRUE
EPI_ISL_78799	A/chicken/Guangxi/KMIII/1999	Y280_G9	Y280_G9	TRUE
EPI_ISL_2157	A/chicken/Hebei/1/00	Y280_G9	Y280_G9	TRUE
EPI_ISL_2443	A/chicken/Hebei/1/96	Y280_G9	Y280_G9	TRUE
EPI_ISL_67722	A/chicken/Hebei/nj/2002	Y280_G9	Y280_G9	TRUE
EPI_ISL_24724	A/chicken/Hebei/sjz2/2001	Y280_G9	Y280_G9	TRUE
EPI_ISL_2236	A/chicken/Heilongjiang/10/97	Y280_G9	Y280_G9	TRUE
EPI_ISL_24918	A/chicken/Henan/01/2007	Y280_G9	Y280_G9	TRUE
EPI_ISL_65629	A/chicken/Henan/1/2004	Y280_G9	Y280_G9	TRUE
EPI_ISL_64827	A/chicken/Henan/1/2005	Y280_G9	Y280_G9	TRUE
EPI_ISL_65630	A/chicken/Henan/2/2004	Y280_G9	Y280_G9	TRUE
EPI_ISL_93809	A/chicken/Henan/N12/2009	Y280_G9	Y280_G9	TRUE
EPI_ISL_93811	A/chicken/Henan/N3/2002	Y280_G9	Y280_G9	TRUE
EPI_ISL_68018	A/chicken/Henan/ni/2001	Y280_G9	Y280_G9	TRUE
EPI_ISL_1264	A/chicken/Hong_Kong/G23/97	Y280_G9	Y280_G9	TRUE
EPI_ISL_14003	A/chicken/Hubei/C1/2007	Y280_G9	Y280_G9	TRUE
EPI_ISL_67726	A/chicken/Hunan/774/2002	Y280_G9	Y280_G9	TRUE
EPI_ISL_90381	A/chicken/Jiangsu/01/2003	Y280_G9	Y280_G9	TRUE
EPI_ISL_68599	A/chicken/Jiangsu/1/1998	Y280_G9	Y280_G9	TRUE
EPI_ISL_68502	A/chicken/Jiangsu/1/1999	Y280_G9	Y280_G9	TRUE
EPI_ISL_67729	A/chicken/Jiangsu/1/2002	Y280_G9	Y280_G9	TRUE
EPI_ISL_65631	A/chicken/Jiangsu/1/2004	Y280_G9	Y280_G9	TRUE
EPI_ISL_68025	A/chicken/Jiangsu/2/2001	Y280_G9	Y280_G9	TRUE
EPI_ISL_2152	A/chicken/Jiangsu/2/98	Y280_G9	Y280_G9	TRUE
EPI_ISL_29822	A/chicken/Jiangsu/7/2002	Y280_G9	Y280_G9	TRUE
EPI_ISL_93810	A/chicken/Jiangsu/A11/2007	Y280_G9	Y280_G9	TRUE
EPI_ISL_3588	A/chicken/Jiangsu/JS-1/2002	Y280_G9	Y280_G9	TRUE
EPI_ISL_68026	A/chicken/Jiangsu/ng/2001	Y280_G9	Y280_G9	TRUE
EPI_ISL_335	A/chicken/Kobe/aq26/2001	Y280_G9	Y280_G9	TRUE
EPI_ISL_3692	A/chicken/Mudanjiang/0823/2000	Y280_G9	Y280_G9	TRUE
EPI_ISL_67738	A/chicken/Neimonggu/nk/2002	Y280_G9	Y280_G9	TRUE
EPI_ISL_333	A/chicken/Osaka/aq48/97	Y280_G9	Y280_G9	TRUE
EPI_ISL_337	A/chicken/Osaka/aq69/2001	Y280_G9	Y280_G9	TRUE
EPI_ISL_82191	A/chicken/Shandong/1/2008	Y280_G9	Y280_G9	TRUE
EPI_ISL_24712	A/chicken/Shandong/2/2003	Y280_G9	Y280_G9	TRUE
EPI_ISL_84313	A/chicken/Shandong/2h/2001	Y280_G9	Y280_G9	TRUE
EPI_ISL_68578	A/chicken/Shandong/98	Y280_G9	Y280_G9	TRUE
EPI_ISL_77228	A/chicken/Shandong/JN4/2005	Y280_G9	Y280_G9	TRUE
EPI_ISL_77229	A/chicken/Shandong/JN5/2005	Y280_G9	Y280_G9	TRUE
EPI_ISL_82537	A/chicken/Shandong/SD0014/2008	Y280_G9	Y280_G9	TRUE
EPI_ISL_8514	A/chicken/Shanghai/10/01	Y280_G9	Y280_G9	TRUE
EPI_ISL_25002	A/chicken/Shanghai/12/2001	Y280_G9	Y280_G9	TRUE
EPI_ISL_2163	A/chicken/Shanghai/3/00	Y280_G9	Y280_G9	TRUE
EPI_ISL_3092	A/chicken/Shanghai/3/01	Y280_G9	Y280_G9	TRUE
EPI_ISL_24998	A/chicken/Shanghai/3/2000	Y280_G9	Y280_G9	TRUE
EPI_ISL_3093	A/chicken/Shanghai/4/01	Y280_G9	Y280_G9	TRUE
EPI_ISL_2164	A/chicken/Shanghai/4-1/01	Y280_G9	Y280_G9	TRUE
EPI_ISL_2165	A/chicken/Shanghai/4-2/01	Y280_G9	Y280_G9	TRUE
EPI_ISL_25001	A/chicken/Shanghai/7/2001	Y280_G9	Y280_G9	TRUE
EPI_ISL_68579	A/chicken/Shanghai/F/98	Y280_G9	Y280_G9	TRUE
EPI_ISL_7475	A/chicken/Shantou/1322/2000	Y280_G9	Y280_G9	TRUE
EPI_ISL_7477	A/chicken/Shantou/1690/2000	Y280_G9	Y280_G9	TRUE
EPI_ISL_7474	A/chicken/Shantou/859/2000	Y280_G9	Y280_G9	TRUE
EPI_ISL_8515	A/chicken/Shijiazhuang/2/98	Y280_G9	Y280_G9	TRUE
EPI_ISL_2239	A/chicken/Sichuan/5/97	Y280_G9	Y280_G9	TRUE
EPI_ISL_2166	A/chicken/Tianjing/1/96	Y280_G9	Y280_G9	TRUE
EPI_ISL_339	A/chicken/Yokohama/aq134/2002	Y280_G9	Y280_G9	TRUE
EPI_ISL_7385	A/chicken/Yunnan/1147/2003	Y280_G9	Y280_G9	TRUE
EPI_ISL_2169	A/chicken/Yunnan/2/00	Y280_G9	Y280_G9	TRUE
EPI_ISL_7389	A/chicken/Yunnan/3727/2004	Y280_G9	Y280_G9	TRUE
EPI_ISL_7382	A/chicken/Yunnan/401/2002	Y280_G9	Y280_G9	TRUE
EPI_ISL_7386	A/chicken/Yunnan/5653/2003	Y280_G9	Y280_G9	TRUE
EPI_ISL_7384	A/chicken/Yunnan/955/2002	Y280_G9	Y280_G9	TRUE
EPI_ISL_68028	A/chicken/Yunnan/nh/2001	Y280_G9	Y280_G9	TRUE
EPI_ISL_13011	A/duck/Guangxi/51/2005	Y280_G9	Y280_G9	TRUE
EPI_ISL_29377	A/duck/Hong_Kong/W213/1997	Y280_G9	Y280_G9	TRUE
EPI_ISL_34046	A/duck/Jiangsu/9/2004	Y280_G9	Y280_G9	TRUE
EPI_ISL_67749	A/duck/Jiangsu/nf/2002	Y280_G9	Y280_G9	TRUE
EPI_ISL_8511	A/duck/Nanjing/2/97	Y280_G9	Y280_G9	TRUE
EPI_ISL_10366	A/duck/Xuzhou/05/2001	Y280_G9	Y280_G9	TRUE
EPI_ISL_10364	A/duck/Zhejiang/03/2001	Y280_G9	Y280_G9	TRUE
EPI_ISL_97019	A/environment/Hong_Kong/1226/1999	Y280_G9	Y280_G9	TRUE
EPI_ISL_1265	A/Pigeon/Hong_Kong/Y233/97	Y280_G9	Y280_G9	TRUE
EPI_ISL_3199	A/quail/Nanchang/2-0460/2000	Y280_G9	Y280_G9	TRUE
EPI_ISL_70609	A/sparrow/Guangxi/09/2005	Y280_G9	Y280_G9	TRUE
EPI_ISL_70614	A/sparrow/Guangxi/121/2007	Y280_G9	Y280_G9	TRUE
EPI_ISL_70613	A/sparrow/Guangxi/93/2006	Y280_G9	Y280_G9	TRUE
EPI_ISL_12580	A/swine/Guangxi/58/2005	Y280_G9	Y280_G9	TRUE
EPI_ISL_13020	A/swine/Guangxi/FS2/2005	Y280_G9	Y280_G9	TRUE
EPI_ISL_141	A/swine/Hong_Kong/10/98	Y280_G9	Y280_G9	TRUE
EPI_ISL_84311	A/swine/Shandong/3/2003	Y280_G9	Y280_G9	TRUE
EPI_ISL_67426	A/swine/Shandong/fHZ/2003	Y280_G9	Y280_G9	TRUE
EPI_ISL_67428	A/swine/Shandong/fLS/2003	Y280_G9	Y280_G9	TRUE
EPI_ISL_67422	A/swine/Shandong/na/2003	Y280_G9	Y280_G9	TRUE
EPI_ISL_67423	A/swine/Shandong/nb/2003	Y280_G9	Y280_G9	TRUE
EPI_ISL_64951	A/swine/Shandong/nc/2005	Y280_G9	Y280_G9	TRUE
EPI_ISL_67424	A/swine/Shandong/w4/2003	Y280_G9	Y280_G9	TRUE
EPI_ISL_62990	A/chicken/Anhui/G6/2008	Y280_Sha_ZB07	Y280_Sha_ZB07	TRUE
EPI_ISL_62993	A/chicken/Anhui/J2/2008	Y280_Sha_ZB07	Y280_Sha_ZB07	TRUE
EPI_ISL_76661	A/chicken/Hebei/A/2007	Y280_Sha_ZB07	Y280_Sha_ZB07	TRUE
EPI_ISL_76662	A/chicken/Hebei/Y2/2009	Y280_Sha_ZB07	Y280_Sha_ZB07	TRUE
EPI_ISL_24736	A/chicken/Shandong/lx414/2007	Y280_Sha_ZB07	Y280_Sha_ZB07	TRUE
EPI_ISL_13019	A/bird/Guangxi/A1/2006	Y280B	Y280B	TRUE
EPI_ISL_93624	A/canine/Guangxi/1/2011/H9N2	Y280B	Y280B	TRUE
EPI_ISL_98117	A/chicken/Anhui/A12/2011	Y280B	Y280B	TRUE
EPI_ISL_98114	A/chicken/Anhui/A17/2011	Y280B	Y280B	TRUE
EPI_ISL_97592	A/chicken/Anhui/A25/2010	Y280B	Y280B	TRUE
EPI_ISL_29162	A/chicken/Anhui/AH23/2008	Y280B	Y280B	TRUE
EPI_ISL_29163	A/chicken/Anhui/AI16/2008	Y280B	Y280B	TRUE
EPI_ISL_29164	A/chicken/Anhui/AK13/2008	Y280B	Y280B	TRUE
EPI_ISL_97751	A/chicken/Anhui/B24/2011	Y280B	Y280B	TRUE
EPI_ISL_97756	A/chicken/Anhui/B6/2011	Y280B	Y280B	TRUE
EPI_ISL_97586	A/chicken/Anhui/D21/2010	Y280B	Y280B	TRUE
EPI_ISL_97745	A/chicken/Anhui/E15/2011	Y280B	Y280B	TRUE
EPI_ISL_98095	A/chicken/Anhui/E19/2011	Y280B	Y280B	TRUE
EPI_ISL_97738	A/chicken/Anhui/F31/2011	Y280B	Y280B	TRUE
EPI_ISL_97642	A/chicken/Anhui/G15/2010	Y280B	Y280B	TRUE
EPI_ISL_97734	A/chicken/Anhui/G18/2011	Y280B	Y280B	TRUE
EPI_ISL_62988	A/chicken/Anhui/G20/2008	Y280B	Y280B	TRUE
EPI_ISL_89714	A/chicken/Anhui/GQY/2011	Y280B	Y280B	TRUE
EPI_ISL_98069	A/chicken/Anhui/I24/2011	Y280B	Y280B	TRUE
EPI_ISL_97720	A/chicken/Anhui/K17/2011	Y280B	Y280B	TRUE
EPI_ISL_97715	A/chicken/Anhui/M5/2011	Y280B	Y280B	TRUE
EPI_ISL_89710	A/chicken/Anhui/WANG/2010	Y280B	Y280B	TRUE
EPI_ISL_89750	A/chicken/Anhui/XMS/2011	Y280B	Y280B	TRUE
EPI_ISL_89715	A/chicken/Anhui/ZTL/2011	Y280B	Y280B	TRUE
EPI_ISL_99613	A/chicken/Anhui/ZYX05/2011	Y280B	Y280B	TRUE
EPI_ISL_84536	A/chicken/Baoshan/111/2009	Y280B	Y280B	TRUE
EPI_ISL_84544	A/chicken/Baoshan/711/2008	Y280B	Y280B	TRUE
EPI_ISL_2170	A/chicken/Beijing/1/97	Y280B	Y280B	TRUE
EPI_ISL_74000	A/chicken/Beijing/19/2003	Y280B	Y280B	TRUE
EPI_ISL_2232	A/chicken/Beijing/8/98	Y280B	Y280B	TRUE
EPI_ISL_4042	A/chicken/Beijing/9/98	Y280B	Y280B	TRUE
EPI_ISL_13996	A/chicken/Beijing/L1/2005	Y280B	Y280B	TRUE
EPI_ISL_69854	A/chicken/China	Y280B	Y280B	TRUE
EPI_ISL_2851	A/chicken/China/AG518/2001	Y280B	Y280B	TRUE
EPI_ISL_90154	A/chicken/China/AH-10-01/2010	Y280B	Y280B	TRUE
EPI_ISL_10168	A/chicken/China/Guangxi1/2000	Y280B	Y280B	TRUE
EPI_ISL_10169	A/chicken/China/Guangxi14/2000	Y280B	Y280B	TRUE
EPI_ISL_10170	A/chicken/China/Guangxi17/2000	Y280B	Y280B	TRUE
EPI_ISL_97669	A/chicken/Chongqing/A56/2011	Y280B	Y280B	TRUE
EPI_ISL_97660	A/chicken/Chongqing/D17/2011	Y280B	Y280B	TRUE
EPI_ISL_98034	A/chicken/Chongqing/G10/2011	Y280B	Y280B	TRUE
EPI_ISL_98031	A/chicken/Chongqing/G14/2011	Y280B	Y280B	TRUE
EPI_ISL_97671	A/chicken/Chongqing/K16/2011	Y280B	Y280B	TRUE
EPI_ISL_97663	A/chicken/Chongqing/K23/2011	Y280B	Y280B	TRUE
EPI_ISL_97670	A/chicken/Chongqing/K3/2011	Y280B	Y280B	TRUE
EPI_ISL_97672	A/chicken/Chongqing/K7/2011	Y280B	Y280B	TRUE
EPI_ISL_84540	A/chicken/Dehong/411/2009	Y280B	Y280B	TRUE
EPI_ISL_73998	A/chicken/Fujian/11/2007	Y280B	Y280B	TRUE
EPI_ISL_7344	A/chicken/Fujian/3080/2005	Y280B	Y280B	TRUE
EPI_ISL_7348	A/chicken/Fujian/5683/2005	Y280B	Y280B	TRUE
EPI_ISL_7356	A/chicken/Fujian/9290/2005	Y280B	Y280B	TRUE
EPI_ISL_7357	A/chicken/Fujian/9752/2005	Y280B	Y280B	TRUE
EPI_ISL_29154	A/chicken/Fujian/FG13/2007	Y280B	Y280B	TRUE
EPI_ISL_29152	A/chicken/Fujian/FH7/2007	Y280B	Y280B	TRUE
EPI_ISL_89652	A/chicken/Fujian/G9/2009	Y280B	Y280B	TRUE
EPI_ISL_99614	A/chicken/Fujian/HJF04/2011	Y280B	Y280B	TRUE
EPI_ISL_89733	A/chicken/Fujian/SL4/2011	Y280B	Y280B	TRUE
EPI_ISL_2155	A/chicken/Gangxi/1/00	Y280B	Y280B	TRUE
EPI_ISL_24917	A/chicken/Guangdong/02/2007	Y280B	Y280B	TRUE
EPI_ISL_24718	A/chicken/Guangdong/1/2002	Y280B	Y280B	TRUE
EPI_ISL_8495	A/chicken/Guangdong/21/02	Y280B	Y280B	TRUE
EPI_ISL_24722	A/chicken/Guangdong/22/2001	Y280B	Y280B	TRUE
EPI_ISL_8496	A/chicken/Guangdong/4/00	Y280B	Y280B	TRUE
EPI_ISL_8497	A/chicken/Guangdong/47/01	Y280B	Y280B	TRUE
EPI_ISL_69427	A/chicken/Guangdong/A10/2007	Y280B	Y280B	TRUE
EPI_ISL_69425	A/chicken/Guangdong/A3/2003	Y280B	Y280B	TRUE
EPI_ISL_69429	A/chicken/Guangdong/A4/2003	Y280B	Y280B	TRUE
EPI_ISL_69426	A/chicken/Guangdong/A5/2003	Y280B	Y280B	TRUE
EPI_ISL_69421	A/chicken/Guangdong/A6/2003	Y280B	Y280B	TRUE
EPI_ISL_69415	A/chicken/Guangdong/A7/2002	Y280B	Y280B	TRUE
EPI_ISL_98259	A/chicken/Guangdong/B106/2009	Y280B	Y280B	TRUE
EPI_ISL_98302	A/chicken/Guangdong/B16/2009	Y280B	Y280B	TRUE
EPI_ISL_69428	A/chicken/Guangdong/B2/2006	Y280B	Y280B	TRUE
EPI_ISL_69416	A/chicken/Guangdong/B4/2006	Y280B	Y280B	TRUE
EPI_ISL_69418	A/chicken/Guangdong/B5/2002	Y280B	Y280B	TRUE
EPI_ISL_69419	A/chicken/Guangdong/B7/2003	Y280B	Y280B	TRUE
EPI_ISL_98244	A/chicken/Guangdong/B87/2009	Y280B	Y280B	TRUE
EPI_ISL_69417	A/chicken/Guangdong/B9/2002	Y280B	Y280B	TRUE
EPI_ISL_97515	A/chicken/Guangdong/D2/2010	Y280B	Y280B	TRUE
EPI_ISL_99619	A/chicken/Guangdong/DJN03/2011	Y280B	Y280B	TRUE
EPI_ISL_69410	A/chicken/Guangdong/E24/2008	Y280B	Y280B	TRUE
EPI_ISL_69411	A/chicken/Guangdong/E25/2008	Y280B	Y280B	TRUE
EPI_ISL_69430	A/chicken/Guangdong/G7/2009	Y280B	Y280B	TRUE
EPI_ISL_23098	A/chicken/Guangdong/GZ02/2008	Y280B	Y280B	TRUE
EPI_ISL_97510	A/chicken/Guangdong/H11/2010	Y280B	Y280B	TRUE
EPI_ISL_97509	A/chicken/Guangdong/H12/2010	Y280B	Y280B	TRUE
EPI_ISL_97508	A/chicken/Guangdong/H28/2010	Y280B	Y280B	TRUE
EPI_ISL_97507	A/chicken/Guangdong/H29/2010	Y280B	Y280B	TRUE
EPI_ISL_69412	A/chicken/Guangdong/HE10/2009	Y280B	Y280B	TRUE
EPI_ISL_69424	A/chicken/Guangdong/HE12/2008	Y280B	Y280B	TRUE
EPI_ISL_69423	A/chicken/Guangdong/HE20/2008	Y280B	Y280B	TRUE
EPI_ISL_69413	A/chicken/Guangdong/HE21/2008	Y280B	Y280B	TRUE
EPI_ISL_69414	A/chicken/Guangdong/HE22/2008	Y280B	Y280B	TRUE
EPI_ISL_98217	A/chicken/Guangdong/J22/2009	Y280B	Y280B	TRUE
EPI_ISL_98315	A/chicken/Guangdong/J23/2009	Y280B	Y280B	TRUE
EPI_ISL_98312	A/chicken/Guangdong/K23/2009	Y280B	Y280B	TRUE
EPI_ISL_98320	A/chicken/Guangdong/K3/2009	Y280B	Y280B	TRUE
EPI_ISL_98301	A/chicken/Guangdong/K8/2009	Y280B	Y280B	TRUE
EPI_ISL_83298	A/chicken/Guangdong/L14/2009	Y280B	Y280B	TRUE
EPI_ISL_98219	A/chicken/Guangdong/P2/2009	Y280B	Y280B	TRUE
EPI_ISL_98223	A/chicken/Guangdong/P20/2009	Y280B	Y280B	TRUE
EPI_ISL_89648	A/chicken/Guangdong/Q6/2010	Y280B	Y280B	TRUE
EPI_ISL_98298	A/chicken/Guangdong/R13/2009	Y280B	Y280B	TRUE
EPI_ISL_98234	A/chicken/Guangdong/R17/2009	Y280B	Y280B	TRUE
EPI_ISL_98300	A/chicken/Guangdong/R21/2009	Y280B	Y280B	TRUE
EPI_ISL_98242	A/chicken/Guangdong/V23/2009	Y280B	Y280B	TRUE
EPI_ISL_83299	A/chicken/Guangdong/Y1/2009	Y280B	Y280B	TRUE
EPI_ISL_98299	A/chicken/Guangdong/Y18/2009	Y280B	Y280B	TRUE
EPI_ISL_98305	A/chicken/Guangdong/Y4/2009	Y280B	Y280B	TRUE
EPI_ISL_98304	A/chicken/Guangdong/Y7/2009	Y280B	Y280B	TRUE
EPI_ISL_83297	A/chicken/Guangdongg/G9/2009	Y280B	Y280B	TRUE
EPI_ISL_7371	A/chicken/Guangxi/4745/2005	Y280B	Y280B	TRUE
EPI_ISL_13013	A/chicken/Guangxi/55/2005	Y280B	Y280B	TRUE
EPI_ISL_13012	A/chicken/Guangxi/6/2000	Y280B	Y280B	TRUE
EPI_ISL_99615	A/chicken/Guangxi/LRW04/2011	Y280B	Y280B	TRUE
EPI_ISL_89742	A/chicken/Guangxi/MFX/2011	Y280B	Y280B	TRUE
EPI_ISL_77226	A/chicken/Guangzhou/GZ/2005	Y280B	Y280B	TRUE
EPI_ISL_97579	A/chicken/Guizhou/D15/2010	Y280B	Y280B	TRUE
EPI_ISL_83288	A/chicken/Guizhou/D26/2009	Y280B	Y280B	TRUE
EPI_ISL_97703	A/chicken/Guizhou/D26/2011	Y280B	Y280B	TRUE
EPI_ISL_83290	A/chicken/Guizhou/Q16/2009	Y280B	Y280B	TRUE
EPI_ISL_99616	A/chicken/Guizhou/XK04/2011	Y280B	Y280B	TRUE
EPI_ISL_98004	A/chicken/Hainan/A4/2011	Y280B	Y280B	TRUE
EPI_ISL_97992	A/chicken/Hainan/J3/2011	Y280B	Y280B	TRUE
EPI_ISL_89649	A/chicken/Hainan/Q4/2010	Y280B	Y280B	TRUE
EPI_ISL_84330	A/chicken/Hebei/0329/2007	Y280B	Y280B	TRUE
EPI_ISL_24723	A/chicken/Hebei/2/2002	Y280B	Y280B	TRUE
EPI_ISL_2445	A/chicken/Hebei/3/98	Y280B	Y280B	TRUE
EPI_ISL_8503	A/chicken/Hebei/31/00	Y280B	Y280B	TRUE
EPI_ISL_2235	A/chicken/Hebei/4/98	Y280B	Y280B	TRUE
EPI_ISL_13995	A/chicken/Hebei/B1/2001	Y280B	Y280B	TRUE
EPI_ISL_84327	A/chicken/Hebei/C6/2007	Y280B	Y280B	TRUE
EPI_ISL_84326	A/chicken/Hebei/LC/2008	Y280B	Y280B	TRUE
EPI_ISL_8505	A/chicken/Heilongjiang/48/01	Y280B	Y280B	TRUE
EPI_ISL_24709	A/chicken/Henan/1/2001	Y280B	Y280B	TRUE
EPI_ISL_8507	A/chicken/Henan/43/02	Y280B	Y280B	TRUE
EPI_ISL_24710	A/chicken/Henan/5/2001	Y280B	Y280B	TRUE
EPI_ISL_2237	A/chicken/Henan/62/00	Y280B	Y280B	TRUE
EPI_ISL_24711	A/chicken/Henan/622/2006	Y280B	Y280B	TRUE
EPI_ISL_68577	A/chicken/Henan/98	Y280B	Y280B	TRUE
EPI_ISL_97583	A/chicken/Henan/A16/2010	Y280B	Y280B	TRUE
EPI_ISL_12623	A/chicken/Henan/A3/1998	Y280B	Y280B	TRUE
EPI_ISL_97984	A/chicken/Henan/B19/2011	Y280B	Y280B	TRUE
EPI_ISL_97700	A/chicken/Henan/D17/2011	Y280B	Y280B	TRUE
EPI_ISL_97633	A/chicken/Henan/E1/2010	Y280B	Y280B	TRUE
EPI_ISL_97978	A/chicken/Henan/E10/2011	Y280B	Y280B	TRUE
EPI_ISL_97973	A/chicken/Henan/E18/2011	Y280B	Y280B	TRUE
EPI_ISL_97632	A/chicken/Henan/E2/2010	Y280B	Y280B	TRUE
EPI_ISL_97970	A/chicken/Henan/E24/2011	Y280B	Y280B	TRUE
EPI_ISL_97958	A/chicken/Henan/F16/2011	Y280B	Y280B	TRUE
EPI_ISL_97619	A/chicken/Henan/G11/2010	Y280B	Y280B	TRUE
EPI_ISL_97617	A/chicken/Henan/G15/2010	Y280B	Y280B	TRUE
EPI_ISL_97942	A/chicken/Henan/G15/2011	Y280B	Y280B	TRUE
EPI_ISL_97615	A/chicken/Henan/G19/2010	Y280B	Y280B	TRUE
EPI_ISL_97912	A/chicken/Henan/H29/2011	Y280B	Y280B	TRUE
EPI_ISL_97910	A/chicken/Henan/H5/2011	Y280B	Y280B	TRUE
EPI_ISL_97905	A/chicken/Henan/I27/2011	Y280B	Y280B	TRUE
EPI_ISL_97901	A/chicken/Henan/J14/2011	Y280B	Y280B	TRUE
EPI_ISL_97898	A/chicken/Henan/J22/2011	Y280B	Y280B	TRUE
EPI_ISL_3216	A/chicken/Hong_Kong/WF2/99	Y280B	Y280B	TRUE
EPI_ISL_4452	A/chicken/HongKong/AP45/03	Y280B	Y280B	TRUE
EPI_ISL_4451	A/chicken/HongKong/CSW153/03	Y280B	Y280B	TRUE
EPI_ISL_4454	A/chicken/HongKong/CSW291/03	Y280B	Y280B	TRUE
EPI_ISL_4455	A/chicken/HongKong/CSW304/03	Y280B	Y280B	TRUE
EPI_ISL_4458	A/chicken/HongKong/NT142/03	Y280B	Y280B	TRUE
EPI_ISL_4467	A/chicken/HongKong/NT366/03	Y280B	Y280B	TRUE
EPI_ISL_4459	A/chicken/HongKong/SF1/03	Y280B	Y280B	TRUE
EPI_ISL_4468	A/chicken/HongKong/SSP418/03	Y280B	Y280B	TRUE
EPI_ISL_4461	A/chicken/HongKong/TP38/03	Y280B	Y280B	TRUE
EPI_ISL_4466	A/chicken/HongKong/WF120/03	Y280B	Y280B	TRUE
EPI_ISL_4469	A/chicken/HongKong/YU427/03	Y280B	Y280B	TRUE
EPI_ISL_69859	A/chicken/Hubei	Y280B	Y280B	TRUE
EPI_ISL_96868	A/chicken/Hubei/01/1999	Y280B	Y280B	TRUE
EPI_ISL_97682	A/chicken/Hubei/558/2011	Y280B	Y280B	TRUE
EPI_ISL_97679	A/chicken/Hubei/661/2011	Y280B	Y280B	TRUE
EPI_ISL_97548	A/chicken/Hubei/A28/2010	Y280B	Y280B	TRUE
EPI_ISL_97552	A/chicken/Hubei/A4/2010	Y280B	Y280B	TRUE
EPI_ISL_69396	A/chicken/Hubei/E13/2008	Y280B	Y280B	TRUE
EPI_ISL_97533	A/chicken/Hubei/E17/2010	Y280B	Y280B	TRUE
EPI_ISL_97528	A/chicken/Hubei/E23/2010	Y280B	Y280B	TRUE
EPI_ISL_97539	A/chicken/Hubei/E8/2010	Y280B	Y280B	TRUE
EPI_ISL_97517	A/chicken/Hubei/G21/2010	Y280B	Y280B	TRUE
EPI_ISL_97524	A/chicken/Hubei/G4/2010	Y280B	Y280B	TRUE
EPI_ISL_97523	A/chicken/Hubei/G5/2010	Y280B	Y280B	TRUE
EPI_ISL_97522	A/chicken/Hubei/G6/2010	Y280B	Y280B	TRUE
EPI_ISL_97521	A/chicken/Hubei/G9/2010	Y280B	Y280B	TRUE
EPI_ISL_89723	A/chicken/Hubei/GYC/2011	Y280B	Y280B	TRUE
EPI_ISL_89730	A/chicken/Hubei/HWC/2011	Y280B	Y280B	TRUE
EPI_ISL_98297	A/chicken/Hubei/J9/2009	Y280B	Y280B	TRUE
EPI_ISL_99617	A/chicken/Hubei/LLM03/2011	Y280B	Y280B	TRUE
EPI_ISL_89729	A/chicken/Hubei/ZWC/2011	Y280B	Y280B	TRUE
EPI_ISL_7378	A/chicken/Hunan/4444/2005	Y280B	Y280B	TRUE
EPI_ISL_7380	A/chicken/Hunan/5700/2005	Y280B	Y280B	TRUE
EPI_ISL_7381	A/chicken/Hunan/6108/2005	Y280B	Y280B	TRUE
EPI_ISL_29149	A/chicken/Hunan/HB25/2007	Y280B	Y280B	TRUE
EPI_ISL_29148	A/chicken/Hunan/HB29/2007	Y280B	Y280B	TRUE
EPI_ISL_29166	A/chicken/Hunan/HB5/2007	Y280B	Y280B	TRUE
EPI_ISL_29167	A/chicken/Hunan/HE5/2007	Y280B	Y280B	TRUE
EPI_ISL_73326	A/chicken/Jiande/01/2009	Y280B	Y280B	TRUE
EPI_ISL_97569	A/chicken/Jiangsu/A7/2010	Y280B	Y280B	TRUE
EPI_ISL_97568	A/chicken/Jiangsu/A9/2010	Y280B	Y280B	TRUE
EPI_ISL_97870	A/chicken/Jiangsu/B27/2011	Y280B	Y280B	TRUE
EPI_ISL_97867	A/chicken/Jiangsu/B4/2011	Y280B	Y280B	TRUE
EPI_ISL_97862	A/chicken/Jiangsu/D10/2011	Y280B	Y280B	TRUE
EPI_ISL_69397	A/chicken/Jiangsu/E26/2007	Y280B	Y280B	TRUE
EPI_ISL_97612	A/chicken/Jiangsu/G12/2010	Y280B	Y280B	TRUE
EPI_ISL_97560	A/chicken/Jiangsu/H11/2010	Y280B	Y280B	TRUE
EPI_ISL_97859	A/chicken/Jiangsu/H13/2011	Y280B	Y280B	TRUE
EPI_ISL_97858	A/chicken/Jiangsu/H2/2011	Y280B	Y280B	TRUE
EPI_ISL_97853	A/chicken/Jiangsu/I2/2011	Y280B	Y280B	TRUE
EPI_ISL_97852	A/chicken/Jiangsu/I20/2011	Y280B	Y280B	TRUE
EPI_ISL_89740	A/chicken/Jiangsu/LWC/2011	Y280B	Y280B	TRUE
EPI_ISL_89650	A/chicken/Jiangsu/Q3/2010	Y280B	Y280B	TRUE
EPI_ISL_89646	A/chicken/Jiangsu/U1/2010	Y280B	Y280B	TRUE
EPI_ISL_89645	A/chicken/Jiangsu/U2/2010	Y280B	Y280B	TRUE
EPI_ISL_89644	A/chicken/Jiangsu/U3/2010	Y280B	Y280B	TRUE
EPI_ISL_89734	A/chicken/Jiangsu/WXY/2011	Y280B	Y280B	TRUE
EPI_ISL_84325	A/chicken/Jiangxi/12/2007	Y280B	Y280B	TRUE
EPI_ISL_98348	A/chicken/Jilin/2/2009	Y280B	Y280B	TRUE
EPI_ISL_98273	A/chicken/Jilin/43/2009	Y280B	Y280B	TRUE
EPI_ISL_8509	A/chicken/Jilin/53/01	Y280B	Y280B	TRUE
EPI_ISL_98270	A/chicken/Jilin/63/2009	Y280B	Y280B	TRUE
EPI_ISL_83291	A/chicken/Jilin/G12/2009	Y280B	Y280B	TRUE
EPI_ISL_98268	A/chicken/Jilin/Y20/2009	Y280B	Y280B	TRUE
EPI_ISL_2159	A/chicken/Liaoning/1/00	Y280B	Y280B	TRUE
EPI_ISL_2160	A/chicken/Liaoning/2/00	Y280B	Y280B	TRUE
EPI_ISL_29160	A/chicken/Liaoning/3/2007	Y280B	Y280B	TRUE
EPI_ISL_84546	A/chicken/Lincang/711/2008	Y280B	Y280B	TRUE
EPI_ISL_97698	A/chicken/Ningxia/29/2011	Y280B	Y280B	TRUE
EPI_ISL_97696	A/chicken/Ningxia/31/2011	Y280B	Y280B	TRUE
EPI_ISL_8512	A/chicken/Ningxia/4/99	Y280B	Y280B	TRUE
EPI_ISL_97846	A/chicken/Ningxia/A15/2011	Y280B	Y280B	TRUE
EPI_ISL_97844	A/chicken/Ningxia/A21/2011	Y280B	Y280B	TRUE
EPI_ISL_98330	A/chicken/Ningxia/N22/2009	Y280B	Y280B	TRUE
EPI_ISL_83293	A/chicken/Ningxia/R13/2009	Y280B	Y280B	TRUE
EPI_ISL_342	A/chicken/Osaka/aq19/2001	Y280B	Y280B	TRUE
EPI_ISL_336	A/chicken/Osaka/aq58/2001	Y280B	Y280B	TRUE
EPI_ISL_84538	A/chicken/Puer/411/2009	Y280B	Y280B	TRUE
EPI_ISL_74004	A/chicken/Sandong/Li/2008	Y280B	Y280B	TRUE
EPI_ISL_68602	A/chicken/Shandong/1/1998	Y280B	Y280B	TRUE
EPI_ISL_84324	A/chicken/Shandong/1/2006	Y280B	Y280B	TRUE
EPI_ISL_2161	A/chicken/Shandong/1/98	Y280B	Y280B	TRUE
EPI_ISL_84323	A/chicken/Shandong/12/2008	Y280B	Y280B	TRUE
EPI_ISL_84321	A/chicken/Shandong/1231/2008	Y280B	Y280B	TRUE
EPI_ISL_2162	A/chicken/Shandong/2/99	Y280B	Y280B	TRUE
EPI_ISL_84322	A/chicken/Shandong/22/2008	Y280B	Y280B	TRUE
EPI_ISL_80509	A/chicken/Shandong/A1/2009	Y280B	Y280B	TRUE
EPI_ISL_97249	A/chicken/Shandong/B/2009	Y280B	Y280B	TRUE
EPI_ISL_97248	A/chicken/Shandong/E/2010	Y280B	Y280B	TRUE
EPI_ISL_77200	A/chicken/Shandong/FX/2009	Y280B	Y280B	TRUE
EPI_ISL_77198	A/chicken/Shandong/HY/2009	Y280B	Y280B	TRUE
EPI_ISL_77230	A/chicken/Shandong/JN/1999	Y280B	Y280B	TRUE
EPI_ISL_97246	A/chicken/Shandong/L/2010	Y280B	Y280B	TRUE
EPI_ISL_24732	A/chicken/Shandong/lc1124/2007	Y280B	Y280B	TRUE
EPI_ISL_77231	A/chicken/Shandong/LW/1999	Y280B	Y280B	TRUE
EPI_ISL_24737	A/chicken/Shandong/lx1023/2007	Y280B	Y280B	TRUE
EPI_ISL_24738	A/chicken/Shandong/lx1027/2007	Y280B	Y280B	TRUE
EPI_ISL_84320	A/chicken/Shandong/LY/2006	Y280B	Y280B	TRUE
EPI_ISL_77232	A/chicken/Shandong/LY/2008	Y280B	Y280B	TRUE
EPI_ISL_97245	A/chicken/Shandong/M/2010	Y280B	Y280B	TRUE
EPI_ISL_24741	A/chicken/Shandong/mp1224/2007	Y280B	Y280B	TRUE
EPI_ISL_97244	A/chicken/Shandong/N/2010	Y280B	Y280B	TRUE
EPI_ISL_24920	A/chicken/Shandong/qd04/2007	Y280B	Y280B	TRUE
EPI_ISL_77233	A/chicken/Shandong/S2/2005	Y280B	Y280B	TRUE
EPI_ISL_77201	A/chicken/Shandong/SG1/2009	Y280B	Y280B	TRUE
EPI_ISL_77202	A/chicken/Shandong/SG2/2009	Y280B	Y280B	TRUE
EPI_ISL_97602	A/chicken/Shandong/TH9/2010	Y280B	Y280B	TRUE
EPI_ISL_97812	A/chicken/Shandong/WG10/2011	Y280B	Y280B	TRUE
EPI_ISL_77199	A/chicken/Shandong/WL/2009	Y280B	Y280B	TRUE
EPI_ISL_24742	A/chicken/Shandong/yt1105/2007	Y280B	Y280B	TRUE
EPI_ISL_24730	A/chicken/Shandong/zc820/2006	Y280B	Y280B	TRUE
EPI_ISL_7313	A/chicken/Shantou/1138/2004	Y280B	Y280B	TRUE
EPI_ISL_7481	A/chicken/Shantou/1205/2001	Y280B	Y280B	TRUE
EPI_ISL_7337	A/chicken/Shantou/14907/2005	Y280B	Y280B	TRUE
EPI_ISL_7476	A/chicken/Shantou/1579/2000	Y280B	Y280B	TRUE
EPI_ISL_7483	A/chicken/Shantou/1608/2001	Y280B	Y280B	TRUE
EPI_ISL_7301	A/chicken/Shantou/1689/2003	Y280B	Y280B	TRUE
EPI_ISL_7338	A/chicken/Shantou/17139/2005	Y280B	Y280B	TRUE
EPI_ISL_7485	A/chicken/Shantou/1890/2001	Y280B	Y280B	TRUE
EPI_ISL_7339	A/chicken/Shantou/19465/2005	Y280B	Y280B	TRUE
EPI_ISL_7479	A/chicken/Shantou/2098/2000	Y280B	Y280B	TRUE
EPI_ISL_7473	A/chicken/Shantou/212/2000	Y280B	Y280B	TRUE
EPI_ISL_7293	A/chicken/Shantou/2204/2002	Y280B	Y280B	TRUE
EPI_ISL_7342	A/chicken/Shantou/22504/2005	Y280B	Y280B	TRUE
EPI_ISL_7302	A/chicken/Shantou/2686/2003	Y280B	Y280B	TRUE
EPI_ISL_7318	A/chicken/Shantou/2994/2004	Y280B	Y280B	TRUE
EPI_ISL_7304	A/chicken/Shantou/3341/2003	Y280B	Y280B	TRUE
EPI_ISL_7489	A/chicken/Shantou/3778/2001	Y280B	Y280B	TRUE
EPI_ISL_7305	A/chicken/Shantou/4101/2003	Y280B	Y280B	TRUE
EPI_ISL_7295	A/chicken/Shantou/4342/2002	Y280B	Y280B	TRUE
EPI_ISL_7291	A/chicken/Shantou/439/2002	Y280B	Y280B	TRUE
EPI_ISL_7296	A/chicken/Shantou/4608/2002	Y280B	Y280B	TRUE
EPI_ISL_7491	A/chicken/Shantou/5028/2001	Y280B	Y280B	TRUE
EPI_ISL_7492	A/chicken/Shantou/5319/2001	Y280B	Y280B	TRUE
EPI_ISL_7328	A/chicken/Shantou/55/2005	Y280B	Y280B	TRUE
EPI_ISL_7289	A/chicken/Shantou/5714/2001	Y280B	Y280B	TRUE
EPI_ISL_7297	A/chicken/Shantou/69/2003	Y280B	Y280B	TRUE
EPI_ISL_7327	A/chicken/Shantou/7920/2004	Y280B	Y280B	TRUE
EPI_ISL_7298	A/chicken/Shantou/944/2003	Y280B	Y280B	TRUE
EPI_ISL_7309	A/chicken/Shantou/99/2004	Y280B	Y280B	TRUE
EPI_ISL_97798	A/chicken/Shanxi/B3/2011	Y280B	Y280B	TRUE
EPI_ISL_97796	A/chicken/Shanxi/D24/2011	Y280B	Y280B	TRUE
EPI_ISL_97793	A/chicken/Shanxi/D4/2011	Y280B	Y280B	TRUE
EPI_ISL_83287	A/chicken/Shanxi/H14/2009	Y280B	Y280B	TRUE
EPI_ISL_97771	A/chicken/Shanxi/J4/2011	Y280B	Y280B	TRUE
EPI_ISL_97769	A/chicken/Shanxi/K1/2011	Y280B	Y280B	TRUE
EPI_ISL_24744	A/chicken/Sichuan/bs1210/2007	Y280B	Y280B	TRUE
EPI_ISL_69402	A/chicken/Sichuan/G2/2009	Y280B	Y280B	TRUE
EPI_ISL_69403	A/chicken/Sichuan/G3/2009	Y280B	Y280B	TRUE
EPI_ISL_98221	A/chicken/Tianjin/F17/2009	Y280B	Y280B	TRUE
EPI_ISL_83296	A/chicken/Tibet/L18/2009	Y280B	Y280B	TRUE
EPI_ISL_89114	A/chicken/Tibet/S1/2009	Y280B	Y280B	TRUE
EPI_ISL_84541	A/chicken/Wenshan/412/2009	Y280B	Y280B	TRUE
EPI_ISL_29145	A/chicken/Xinjiang/XJ154/2007	Y280B	Y280B	TRUE
EPI_ISL_29146	A/chicken/Xinjiang/XJ75/2007	Y280B	Y280B	TRUE
EPI_ISL_13563	A/chicken/YN/BanNa2/2006	Y280B	Y280B	TRUE
EPI_ISL_341	A/chicken/Yokohama/aq120/2001	Y280B	Y280B	TRUE
EPI_ISL_340	A/chicken/Yokohama/aq135/2001	Y280B	Y280B	TRUE
EPI_ISL_343	A/chicken/Yokohama/aq144/2001	Y280B	Y280B	TRUE
EPI_ISL_334	A/chicken/Yokohama/aq55/2001	Y280B	Y280B	TRUE
EPI_ISL_13760	A/chicken/Yunnan/BaoShan3/2007	Y280B	Y280B	TRUE
EPI_ISL_13761	A/chicken/Yunnan/Chuxiong1/2007	Y280B	Y280B	TRUE
EPI_ISL_13763	A/chicken/Yunnan/Chuxiong3/2007	Y280B	Y280B	TRUE
EPI_ISL_13764	A/chicken/Yunnan/Dehong1/2007	Y280B	Y280B	TRUE
EPI_ISL_63468	A/chicken/Yunnan/Kunming/2007	Y280B	Y280B	TRUE
EPI_ISL_19170	A/chicken/Yunnan/qujing09/07	Y280B	Y280B	TRUE
EPI_ISL_63469	A/chicken/Yunnan/Wenshan/2007	Y280B	Y280B	TRUE
EPI_ISL_29143	A/chicken/Yunnan/YC12/2007	Y280B	Y280B	TRUE
EPI_ISL_63470	A/chicken/Yunnan/Zhaotong/2007	Y280B	Y280B	TRUE
EPI_ISL_84548	A/chicken/Yunnanbn/411/2009	Y280B	Y280B	TRUE
EPI_ISL_84545	A/chicken/Yunnandh/101/2008	Y280B	Y280B	TRUE
EPI_ISL_84547	A/chicken/Yunnanws/102/2008	Y280B	Y280B	TRUE
EPI_ISL_89726	A/chicken/Zhejiang/FSQ/2011	Y280B	Y280B	TRUE
EPI_ISL_69437	A/chicken/Zhejiang/HE1/2009	Y280B	Y280B	TRUE
EPI_ISL_69434	A/chicken/Zhejiang/HE3/2009	Y280B	Y280B	TRUE
EPI_ISL_69435	A/chicken/Zhejiang/HE7/2009	Y280B	Y280B	TRUE
EPI_ISL_69433	A/chicken/Zhejiang/HF2/2009	Y280B	Y280B	TRUE
EPI_ISL_69432	A/chicken/Zhejiang/HF3/2009	Y280B	Y280B	TRUE
EPI_ISL_63471	A/chicken/Zhejiang/HJ/2007	Y280B	Y280B	TRUE
EPI_ISL_89651	A/chicken/Zhejiang/Q1D4/2010	Y280B	Y280B	TRUE
EPI_ISL_89653	A/chicken/Zhejiang/SJL/2009	Y280B	Y280B	TRUE
EPI_ISL_89737	A/chicken/Zhejiang/ZLB/2011	Y280B	Y280B	TRUE
EPI_ISL_7426	A/chukkar/Shantou/4635/2003	Y280B	Y280B	TRUE
EPI_ISL_7445	A/chukkar/Shantou/5866/2004	Y280B	Y280B	TRUE
EPI_ISL_9789	A/Ck/HK/NT142/2003	Y280B	Y280B	TRUE
EPI_ISL_9790	A/Ck/HK/WF126/2003	Y280B	Y280B	TRUE
EPI_ISL_9792	A/Ck/HK/YU463/2003	Y280B	Y280B	TRUE
EPI_ISL_9793	A/Ck/HK/YU577/2003	Y280B	Y280B	TRUE
EPI_ISL_97648	A/duck/Anhui/B24/2010	Y280B	Y280B	TRUE
EPI_ISL_69873	A/duck/China	Y280B	Y280B	TRUE
EPI_ISL_83491	A/duck/Fujian/FQ107/2007	Y280B	Y280B	TRUE
EPI_ISL_100152	A/duck/Fujian/FQ2/2007	Y280B	Y280B	TRUE
EPI_ISL_69400	A/duck/Fujian/T14/2007	Y280B	Y280B	TRUE
EPI_ISL_69399	A/duck/Fujian/T7/2007	Y280B	Y280B	TRUE
EPI_ISL_69420	A/duck/Guangdong/810/2009	Y280B	Y280B	TRUE
EPI_ISL_98218	A/duck/Guangdong/A14/2009	Y280B	Y280B	TRUE
EPI_ISL_98225	A/duck/Guangdong/A70/2009	Y280B	Y280B	TRUE
EPI_ISL_97604	A/duck/Guangdong/G24/2010	Y280B	Y280B	TRUE
EPI_ISL_84539	A/duck/Honghe/111/2009	Y280B	Y280B	TRUE
EPI_ISL_10144	A/duck/Hubei/W1/2004	Y280B	Y280B	TRUE
EPI_ISL_8922	A/duck/Nanchang/4-361/2001	Y280B	Y280B	TRUE
EPI_ISL_7406	A/duck/Shantou/12560/2005	Y280B	Y280B	TRUE
EPI_ISL_7397	A/duck/Shantou/3460/2003	Y280B	Y280B	TRUE
EPI_ISL_7390	A/duck/Shantou/3549/2001	Y280B	Y280B	TRUE
EPI_ISL_7395	A/duck/Shantou/4103/2002	Y280B	Y280B	TRUE
EPI_ISL_7396	A/duck/Shantou/4359/2002	Y280B	Y280B	TRUE
EPI_ISL_7391	A/duck/Shantou/5401/2001	Y280B	Y280B	TRUE
EPI_ISL_7392	A/duck/Shantou/5459/2001	Y280B	Y280B	TRUE
EPI_ISL_89133	A/duck/Tibet/S2/2009	Y280B	Y280B	TRUE
EPI_ISL_34047	A/duck/Zhejiang/3/2002	Y280B	Y280B	TRUE
EPI_ISL_70188	A/environment/Hunan/1-23/2007	Y280B	Y280B	TRUE
EPI_ISL_70190	A/environment/Hunan/1-81/2007	Y280B	Y280B	TRUE
EPI_ISL_70191	A/environment/Hunan/2-84/2007	Y280B	Y280B	TRUE
EPI_ISL_70192	A/environment/Hunan/5-38/2007	Y280B	Y280B	TRUE
EPI_ISL_70193	A/feces/Hunan/2-28/2007	Y280B	Y280B	TRUE
EPI_ISL_70194	A/feces/Hunan/3-91/2007	Y280B	Y280B	TRUE
EPI_ISL_97759	A/goose/Jilin/K5/2011	Y280B	Y280B	TRUE
EPI_ISL_19166	A/goose/Yunnan/chuxiong07/07	Y280B	Y280B	TRUE
EPI_ISL_7398	A/Guinea_fowl/Shantou/1677/2000	Y280B	Y280B	TRUE
EPI_ISL_7444	A/Guinea_fowl/Shantou/5852/2004	Y280B	Y280B	TRUE
EPI_ISL_4457	A/guineafowl/HongKong/NT101/03	Y280B	Y280B	TRUE
EPI_ISL_69735	A/Hong_Kong/3239/2008	Y280B	Y280B	TRUE
EPI_ISL_7413	A/partridge/Shantou/2803/2003	Y280B	Y280B	TRUE
EPI_ISL_7414	A/partridge/Shantou/3487/2003	Y280B	Y280B	TRUE
EPI_ISL_7299	A/partridge/Shantou/3720/2001	Y280B	Y280B	TRUE
EPI_ISL_7419	A/partridge/Shantou/3987/2003	Y280B	Y280B	TRUE
EPI_ISL_7408	A/partridge/Shantou/4525/2002	Y280B	Y280B	TRUE
EPI_ISL_7332	A/partridge/Shantou/49/2002	Y280B	Y280B	TRUE
EPI_ISL_7449	A/partridge/Shantou/5692/2000	Y280B	Y280B	TRUE
EPI_ISL_7446	A/partridge/Shantou/6004/2004	Y280B	Y280B	TRUE
EPI_ISL_7460	A/partridge/Shantou/645/2001	Y280B	Y280B	TRUE
EPI_ISL_7455	A/partridge/Shantou/7075/2004	Y280B	Y280B	TRUE
EPI_ISL_4464	A/pheasant/HongKong/WF54/03	Y280B	Y280B	TRUE
EPI_ISL_7462	A/pheasant/Shantou/111/2005	Y280B	Y280B	TRUE
EPI_ISL_7417	A/pheasant/Shantou/3716/2003	Y280B	Y280B	TRUE
EPI_ISL_7423	A/pheasant/Shantou/4340/2003	Y280B	Y280B	TRUE
EPI_ISL_7443	A/pheasant/Shantou/5588/2004	Y280B	Y280B	TRUE
EPI_ISL_7452	A/pheasant/Shantou/6607/2004	Y280B	Y280B	TRUE
EPI_ISL_3185	A/Pigeon/Nanchang/2-0461/2000	Y280B	Y280B	TRUE
EPI_ISL_2244	A/quail/Shanghai/8/96	Y280B	Y280B	TRUE
EPI_ISL_11278	A/quail/Shantou/1158/2001	Y280B	Y280B	TRUE
EPI_ISL_11273	A/quail/Shantou/1820/2000	Y280B	Y280B	TRUE
EPI_ISL_11315	A/quail/Shantou/3856/2003	Y280B	Y280B	TRUE
EPI_ISL_11334	A/quail/Shantou/5011/2005	Y280B	Y280B	TRUE
EPI_ISL_11291	A/quail/Shantou/5675/2001	Y280B	Y280B	TRUE
EPI_ISL_11327	A/quail/Shantou/6794/2004	Y280B	Y280B	TRUE
EPI_ISL_11328	A/quail/Shantou/7397/2004	Y280B	Y280B	TRUE
EPI_ISL_11296	A/quail/Shantou/786/2002	Y280B	Y280B	TRUE
EPI_ISL_11277	A/quail/Shantou/850/2001	Y280B	Y280B	TRUE
EPI_ISL_11335	A/quail/Shantou/8993/2005	Y280B	Y280B	TRUE
EPI_ISL_9791	A/SCk/HK/WF285/2003	Y280B	Y280B	TRUE
EPI_ISL_9794	A/SCk/HK/YU663/2003	Y280B	Y280B	TRUE
EPI_ISL_3044	A/Shaoguan/408/98	Y280B	Y280B	TRUE
EPI_ISL_3045	A/Shaoguan/447/98	Y280B	Y280B	TRUE
EPI_ISL_7314	A/silky_chicken/Shantou/1826/2004	Y280B	Y280B	TRUE
EPI_ISL_7331	A/silky_chicken/Shantou/2131/2005	Y280B	Y280B	TRUE
EPI_ISL_7486	A/silky_chicken/Shantou/2619/2001	Y280B	Y280B	TRUE
EPI_ISL_7329	A/silky_chicken/Shantou/459/2005	Y280B	Y280B	TRUE
EPI_ISL_7307	A/silky_chicken/Shantou/4600/2003	Y280B	Y280B	TRUE
EPI_ISL_7326	A/silky_chicken/Shantou/7790/2004	Y280B	Y280B	TRUE
EPI_ISL_70611	A/sparrow/Guangxi/31/2006	Y280B	Y280B	TRUE
EPI_ISL_70612	A/sparrow/Guangxi/47/2006	Y280B	Y280B	TRUE
EPI_ISL_65625	A/swine/Guangdong/wxl/2004	Y280B	Y280B	TRUE
EPI_ISL_81611	A/swine/Guangxi/10/2007	Y280B	Y280B	TRUE
EPI_ISL_81608	A/swine/Guangxi/7/2007	Y280B	Y280B	TRUE
EPI_ISL_81609	A/swine/Guangxi/8/2007	Y280B	Y280B	TRUE
EPI_ISL_81610	A/swine/Guangxi/9/2007	Y280B	Y280B	TRUE
EPI_ISL_10591	A/swine/Henan/8/2004	Y280B	Y280B	TRUE
EPI_ISL_84439	A/swine/Taizhou/5/2008	Y280B	Y280B	TRUE
EPI_ISL_84440	A/swine/Yangzhou/1/2008	Y280B	Y280B	TRUE
EPI_ISL_3192	A/wild_duck/Nanchang/2-0480/2000	Y280B	Y280B	TRUE

## Sheet: HA1-3
Accession	Strain	Annotation	Prediction	Correct
EPI_ISL_128	A/parakeet/Narita/92A/98	G1_Mideast_D	G1_ME_A-like	FALSE
EPI_ISL_14003	A/chicken/Hubei/C1/2007	Y280_G9	Y280-like	FALSE
EPI_ISL_67422	A/swine/Shandong/na/2003	Y280_G9	Y280-like	FALSE
EPI_ISL_3588	A/chicken/Jiangsu/JS-1/2002	Y280_G9	Y280-like	FALSE
EPI_ISL_67424	A/swine/Shandong/w4/2003	Y280_G9	Y280-like	FALSE
EPI_ISL_10365	A/duck/Xuzhou/07/2003	Y280_G9	Y280-like	FALSE
EPI_ISL_7370	A/chicken/Guangxi/2389/2005	Y280_G9	Y280-like	FALSE
EPI_ISL_67423	A/swine/Shandong/nb/2003	Y280_G9	Y280-like	FALSE
EPI_ISL_8515	A/chicken/Shijiazhuang/2/98	Y280_G9	Y280-like	FALSE
EPI_ISL_2153	A/chicken/Anhui/1/98	Y280_G9	Y280-like	FALSE
EPI_ISL_62993	A/chicken/Anhui/J2/2008	Y280_Sha_ZB07	Y280-like	FALSE
EPI_ISL_24736	A/chicken/Shandong/lx414/2007	Y280_Sha_ZB07	Y280B-like	FALSE
EPI_ISL_334	A/chicken/Yokohama/aq55/2001	Y280B	Y280-like	FALSE
EPI_ISL_8505	A/chicken/Heilongjiang/48/01	Y280B	Y280-like	FALSE
EPI_ISL_8512	A/chicken/Ningxia/4/99	Y280B	Y280-like	FALSE
EPI_ISL_77234	A/chicken/Yangzhou/YZ/2000	Y280B	Y280-like	FALSE
EPI_ISL_8496	A/chicken/Guangdong/4/00	Y280B	Y280-like	FALSE
EPI_ISL_13761	A/chicken/Yunnan/Chuxiong1/2007	Y280B	Y280_Fuj_SL6	FALSE
EPI_ISL_13563	A/chicken/YN/BanNa2/2006	Y280B	Y280_Fuj_SL6	FALSE
EPI_ISL_13760	A/chicken/Yunnan/BaoShan3/2007	Y280B	Y280_Fuj_SL6	FALSE
EPI_ISL_7342	A/chicken/Shantou/22504/2005	Y280B	Y280_Fuj_SL6	FALSE
EPI_ISL_13763	A/chicken/Yunnan/Chuxiong3/2007	Y280B	Y280_Fuj_SL6	FALSE
EPI_ISL_2851	A/chicken/China/AG518/2001	Y280B	Y280_G9	FALSE
EPI_ISL_13012	A/chicken/Guangxi/6/2000	Y280B	Y280_G9	FALSE
EPI_ISL_10169	A/chicken/China/Guangxi14/2000	Y280B	Y280_G9	FALSE
EPI_ISL_3216	A/chicken/Hong_Kong/WF2/99	Y280B	Y280_G9	FALSE
EPI_ISL_10170	A/chicken/China/Guangxi17/2000	Y280B	Y280_G9	FALSE
EPI_ISL_4042	A/chicken/Beijing/9/98	Y280B	Y280_G9	FALSE
EPI_ISL_77232	A/chicken/Shandong/LY/2008	Y280B	Y280_G9	FALSE
EPI_ISL_13019	A/bird/Guangxi/A1/2006	Y280B	Y280_G9	FALSE
EPI_ISL_69859	A/chicken/Hubei	Y280B	Y280_G9	FALSE
EPI_ISL_3185	A/Pigeon/Nanchang/2-0461/2000	Y280B	Y280_G9	FALSE
EPI_ISL_77231	A/chicken/Shandong/LW/1999	Y280B	Y280_G9	FALSE
EPI_ISL_2161	A/chicken/Shandong/1/98	Y280B	Y280_G9	FALSE
EPI_ISL_2237	A/chicken/Henan/62/00	Y280B	Y280_G9	FALSE
EPI_ISL_13996	A/chicken/Beijing/L1/2005	Y280B	Y280_G9	FALSE
EPI_ISL_67390	A/chicken/Shandong/1/2003	Y280B	Y280_G9	FALSE
EPI_ISL_10591	A/swine/Henan/8/2004	Y280B	Y280_G9	FALSE
EPI_ISL_2155	A/chicken/Gangxi/1/00	Y280B	Y280_G9	FALSE
EPI_ISL_2160	A/chicken/Liaoning/2/00	Y280B	Y280_G9	FALSE
EPI_ISL_69873	A/duck/China	Y280B	Y280_G9	FALSE
EPI_ISL_15584	A/swine/Jiangxi/wx2/2004	Y280B	Y280_G9	FALSE
EPI_ISL_81610	A/swine/Guangxi/9/2007	Y280B	Y280_G9	FALSE
EPI_ISL_2444	A/chicken/Hebei/2/98	Y280B	Y280_G9	FALSE
EPI_ISL_65625	A/swine/Guangdong/wxl/2004	Y280B	Y280_G9	FALSE
EPI_ISL_23098	A/chicken/Guangdong/GZ02/2008	Y280B	Y280_G9	FALSE
EPI_ISL_34047	A/duck/Zhejiang/3/2002	Y280B	Y280_Sha_ZB07	FALSE
EPI_ISL_11319	A/quail/Shantou/5/2004	Chk_Bei	Chk_Bei	TRUE
EPI_ISL_7412	A/chukkar/Shantou/1039/2003	Chk_Bei	Chk_Bei	TRUE
EPI_ISL_11340	A/quail/Shantou/20787/2005	Chk_Bei	Chk_Bei	TRUE
EPI_ISL_11297	A/quail/Shantou/1038/2002	Chk_Bei	Chk_Bei	TRUE
EPI_ISL_7428	A/pheasant/Shantou/4709/2003	Chk_Bei	Chk_Bei	TRUE
EPI_ISL_7437	A/chukkar/Shantou/1447/2004	Chk_Bei	Chk_Bei	TRUE
EPI_ISL_7365	A/chukkar/Shantou/465/2002	Chk_Bei	Chk_Bei	TRUE
EPI_ISL_7321	A/partridge/Shantou/4829/2001	Chk_Bei	Chk_Bei	TRUE
EPI_ISL_7464	A/pheasant/Shantou/1578/2005	Chk_Bei	Chk_Bei	TRUE
EPI_ISL_7311	A/silky_chicken/Shantou/473/2004	Chk_Bei	Chk_Bei	TRUE
EPI_ISL_7312	A/silky_chicken/Shantou/999/2004	Chk_Bei	Chk_Bei	TRUE
EPI_ISL_7377	A/chicken/Hunan/4246/2005	Chk_Bei	Chk_Bei	TRUE
EPI_ISL_11269	A/quail/Shantou/243/2000	Chk_Bei	Chk_Bei	TRUE
EPI_ISL_7457	A/partridge/Shantou/7343/2004	Chk_Bei	Chk_Bei	TRUE
EPI_ISL_11287	A/quail/Shantou/4179/2001	Chk_Bei	Chk_Bei	TRUE
EPI_ISL_4465	A/guineafowl/HongKong/NT184/03	Chk_Bei	Chk_Bei	TRUE
EPI_ISL_7436	A/partridge/Shantou/1405/2004	Chk_Bei	Chk_Bei	TRUE
EPI_ISL_7409	A/pheasant/Shantou/443/2003	Chk_Bei	Chk_Bei	TRUE
EPI_ISL_7415	A/pheasant/Shantou/3530/2003	Chk_Bei	Chk_Bei	TRUE
EPI_ISL_7416	A/partridge/Shantou/1800/2000	Chk_Bei	Chk_Bei	TRUE
EPI_ISL_7434	A/partridge/Shantou/688/2004	Chk_Bei	Chk_Bei	TRUE
EPI_ISL_7399	A/chukkar/Shantou/1059/2002	Chk_Bei	Chk_Bei	TRUE
EPI_ISL_11282	A/quail/Shantou/1461/2001	Chk_Bei	Chk_Bei	TRUE
EPI_ISL_7469	A/partridge/Shantou/22102/2005	Chk_Bei	Chk_Bei	TRUE
EPI_ISL_11308	A/quail/Shantou/2608/2003	Chk_Bei	Chk_Bei	TRUE
EPI_ISL_7376	A/chukkar/Shantou/469/2002	Chk_Bei	Chk_Bei	TRUE
EPI_ISL_9786	A/HK/2108/2003	Chk_Bei	Chk_Bei	TRUE
EPI_ISL_11306	A/quail/Shantou/1780/2003	Chk_Bei	Chk_Bei	TRUE
EPI_ISL_11272	A/quail/Shantou/1318/2000	Chk_Bei	Chk_Bei	TRUE
EPI_ISL_77913	A/thick-billed_murre/Alaska/44085-155/2006	DB277	DB277	TRUE
EPI_ISL_11271	A/quail/Shantou/1310/2000	G1_Asia	G1_Asia	TRUE
EPI_ISL_11341	A/quail/Shantou/21605/2005	G1_Asia	G1_Asia	TRUE
EPI_ISL_11337	A/quail/Shantou/13425/2005	G1_Asia	G1_Asia	TRUE
EPI_ISL_7471	A/Guinea_fowl/Shantou/2076/2001	G1_Asia	G1_Asia	TRUE
EPI_ISL_7288	A/partridge/Shantou/2875/2001	G1_Asia	G1_Asia	TRUE
EPI_ISL_11298	A/quail/Shantou/1551/2002	G1_Asia	G1_Asia	TRUE
EPI_ISL_11314	A/quail/Shantou/3768/2003	G1_Asia	G1_Asia	TRUE
EPI_ISL_11288	A/quail/Shantou/4641/2001	G1_Asia	G1_Asia	TRUE
EPI_ISL_11339	A/quail/Shantou/19506/2005	G1_Asia	G1_Asia	TRUE
EPI_ISL_69733	A/Hong_Kong/33982/2009	G1_Asia	G1_Asia	TRUE
EPI_ISL_7470	A/chukkar/Shantou/22116/2005	G1_Asia	G1_Asia	TRUE
EPI_ISL_11336	A/quail/Shantou/11195/2005	G1_Asia	G1_Asia	TRUE
EPI_ISL_11317	A/quail/Shantou/4044/2003	G1_Asia	G1_Asia	TRUE
EPI_ISL_11275	A/quail/Shantou/2816/2000	G1_Asia	G1_Asia	TRUE
EPI_ISL_11280	A/quail/Shantou/1242/2001	G1_Asia	G1_Asia	TRUE
EPI_ISL_11286	A/quail/Shantou/2462/2001	G1_Asia	G1_Asia	TRUE
EPI_ISL_11299	A/quail/Shantou/3851/2002	G1_Asia	G1_Asia	TRUE
EPI_ISL_3215	A/guinea_fowl/Hong_Kong/WF10/99	G1_Asia	G1_Asia	TRUE
EPI_ISL_11318	A/quail/Shantou/4850/2003	G1_Asia	G1_Asia	TRUE
EPI_ISL_11283	A/quail/Shantou/1555/2001	G1_Asia	G1_Asia	TRUE
EPI_ISL_11303	A/quail/Shantou/308/2003	G1_Asia	G1_Asia	TRUE
EPI_ISL_19621	A/chicken/Israel/178/2006	G1_Mideast_A	G1_Mideast_A	TRUE
EPI_ISL_19629	A/chicken/Israel/909/2005	G1_Mideast_A	G1_Mideast_A	TRUE
EPI_ISL_19627	A/chicken/Israel/853/2005	G1_Mideast_A	G1_Mideast_A	TRUE
EPI_ISL_19628	A/turkey/Israel/884/2005	G1_Mideast_A	G1_Mideast_A	TRUE
EPI_ISL_85774	A/chicken/Jordan/1436-643/2004	G1_Mideast_A	G1_Mideast_A	TRUE
EPI_ISL_10373	A/turkey/Israel/810/2001	G1_Mideast_A	G1_Mideast_A	TRUE
EPI_ISL_30443	A/chicken/Israel/375/2007	G1_Mideast_A	G1_Mideast_A	TRUE
EPI_ISL_10376	A/chicken/Israel/1953/2004	G1_Mideast_A	G1_Mideast_A	TRUE
EPI_ISL_3795	A/turkey/Givat_Haim/965/02	G1_Mideast_A	G1_Mideast_A	TRUE
EPI_ISL_4535	A/ostrich/Eshkol/1436/03	G1_Mideast_A	G1_Mideast_A	TRUE
EPI_ISL_63454	A/chicken/Israel/114/2007	G1_Mideast_A	G1_Mideast_A	TRUE
EPI_ISL_10375	A/turkey/Israel/1209/2003	G1_Mideast_A	G1_Mideast_A	TRUE
EPI_ISL_19623	A/turkey/Israel/425/2005	G1_Mideast_A	G1_Mideast_A	TRUE
EPI_ISL_19622	A/chicken/Israel/282/2005	G1_Mideast_A	G1_Mideast_A	TRUE
EPI_ISL_15732	A/chicken/Iran/TH186/2007	G1_Mideast_B	G1_Mideast_B	TRUE
EPI_ISL_63782	A/chicken/Afghanistan/329-3vir09-AFG-Khost2/2008	G1_Mideast_B	G1_Mideast_B	TRUE
EPI_ISL_29788	A/chicken/Pakistan/UDL-02/2005	G1_Mideast_B	G1_Mideast_B	TRUE
EPI_ISL_65650	A/chicken/Iran/133/2004	G1_Mideast_B	G1_Mideast_B	TRUE
EPI_ISL_63447	A/chicken/Iran/THLBM863/2007	G1_Mideast_B	G1_Mideast_B	TRUE
EPI_ISL_78704	A/chicken/Gujarat/3697/2004	G1_Mideast_B	G1_Mideast_B	TRUE
EPI_ISL_27600	A/chicken/Haryana/2051/2003	G1_Mideast_B	G1_Mideast_B	TRUE
EPI_ISL_63459	A/chicken/Israel/728/2007	G1_Mideast_B	G1_Mideast_B	TRUE
EPI_ISL_85781	A/chicken/Saudi_Arabia/08vir3489-38-as92/2005	G1_Mideast_B	G1_Mideast_B	TRUE
EPI_ISL_85786	A/chicken/Saudi_Arabia/08vir3489-47-as215/2007	G1_Mideast_B	G1_Mideast_B	TRUE
EPI_ISL_63444	A/chicken/Iran/SH2/2007	G1_Mideast_B	G1_Mideast_B	TRUE
EPI_ISL_85780	A/chicken/Saudi_Arabia/08vir3489-33-as638/2005	G1_Mideast_B	G1_Mideast_B	TRUE
EPI_ISL_30439	A/chicken/Israel/182/2008	G1_Mideast_B	G1_Mideast_B	TRUE
EPI_ISL_15730	A/chicken/Iran/TH286/2007	G1_Mideast_B	G1_Mideast_B	TRUE
EPI_ISL_11180	A/chicken/Iran/B308B/2004	G1_Mideast_B	G1_Mideast_B	TRUE
EPI_ISL_63450	A/chicken/Iran/THLBM866/2007	G1_Mideast_B	G1_Mideast_B	TRUE
EPI_ISL_85787	A/chicken/Saudi_Arabia/08vir3489-51-as366/2008	G1_Mideast_B	G1_Mideast_B	TRUE
EPI_ISL_30448	A/chicken/Israel/883/2008	G1_Mideast_B	G1_Mideast_B	TRUE
EPI_ISL_63455	A/chicken/Israel/215/2007	G1_Mideast_B	G1_Mideast_B	TRUE
EPI_ISL_63460	A/chicken/Israel/933/2007	G1_Mideast_B	G1_Mideast_B	TRUE
EPI_ISL_97221	A/chicken/India/IVRI-0004/2010	G1_Mideast_B	G1_Mideast_B	TRUE
EPI_ISL_63445	A/chicken/Iran/THLBM861/2007	G1_Mideast_B	G1_Mideast_B	TRUE
EPI_ISL_85794	A/chicken/Iran/10VIR854-4/2009	G1_Mideast_B	G1_Mideast_B	TRUE
EPI_ISL_10545	A/chicken/Iran/L248/03	G1_Mideast_B	G1_Mideast_B	TRUE
EPI_ISL_30440	A/chicken/Israel/184/2009	G1_Mideast_B	G1_Mideast_B	TRUE
EPI_ISL_27601	A/chicken/Punjab/2063/2003	G1_Mideast_B	G1_Mideast_B	TRUE
EPI_ISL_63003	A/chicken/Iran/RZ28/2008	G1_Mideast_B	G1_Mideast_B	TRUE
EPI_ISL_15729	A/chicken/Iran/TH85/2007	G1_Mideast_B	G1_Mideast_B	TRUE
EPI_ISL_85788	A/chicken/Saudi_Arabia/08vir3489-50-as118/2008	G1_Mideast_B	G1_Mideast_B	TRUE
EPI_ISL_67377	A/chicken/Iran/320/2003	G1_Mideast_B	G1_Mideast_B	TRUE
EPI_ISL_83300	A/chicken/Tripura/105131/2008	G1_Mideast_B	G1_Mideast_B	TRUE
EPI_ISL_29794	A/chicken/Pakistan/UDL-02/2008	G1_Mideast_B	G1_Mideast_B	TRUE
EPI_ISL_63452	A/chicken/Iran/THLBM868/2007	G1_Mideast_B	G1_Mideast_B	TRUE
EPI_ISL_64312	A/chicken/Iran/68/2006	G1_Mideast_B	G1_Mideast_B	TRUE
EPI_ISL_85782	A/chicken/Saudi_Arabia/08vir3489-44-as253/2006	G1_Mideast_B	G1_Mideast_B	TRUE
EPI_ISL_97215	A/chicken/India/IVRI-0011/2011	G1_Mideast_B	G1_Mideast_B	TRUE
EPI_ISL_97042	A/chicken/Iran/EBGV-88/2010	G1_Mideast_B	G1_Mideast_B	TRUE
EPI_ISL_85798	A/chicken/Qatar/4576-4/2008	G1_Mideast_B	G1_Mideast_B	TRUE
EPI_ISL_85776	A/chicken/Jordan/436-1/2010	G1_Mideast_B	G1_Mideast_B	TRUE
EPI_ISL_76224	A/chicken/Uchal/8293/2006	G1_Mideast_B	G1_Mideast_B	TRUE
EPI_ISL_15731	A/chicken/Iran/TH386/2007	G1_Mideast_B	G1_Mideast_B	TRUE
EPI_ISL_85777	A/chicken/Jordan/436-2/2010	G1_Mideast_B	G1_Mideast_B	TRUE
EPI_ISL_29274	A/chicken/Iran/TH486-masoumi/2007	G1_Mideast_B	G1_Mideast_B	TRUE
EPI_ISL_78703	A/chicken/Chandigarh/2048/2003	G1_Mideast_B	G1_Mideast_B	TRUE
EPI_ISL_63446	A/chicken/Iran/THLBM862/2007	G1_Mideast_B	G1_Mideast_B	TRUE
EPI_ISL_85785	A/chicken/Saudi_Arabia/08vir3489-48-as997/2007	G1_Mideast_B	G1_Mideast_B	TRUE
EPI_ISL_29786	A/chicken/Pakistan/UDL-04/2006	G1_Mideast_B	G1_Mideast_B	TRUE
EPI_ISL_85792	A/chicken/Iran/10VIR854-3/2009	G1_Mideast_B	G1_Mideast_B	TRUE
EPI_ISL_11182	A/chicken/Iran/B76/2004	G1_Mideast_B	G1_Mideast_B	TRUE
EPI_ISL_29796	A/chicken/Pakistan/UDL-04/2007	G1_Mideast_B	G1_Mideast_B	TRUE
EPI_ISL_30446	A/chicken/Israel/702/2008	G1_Mideast_B	G1_Mideast_B	TRUE
EPI_ISL_85796	A/chicken/Kurdistan/4693-9/2009	G1_Mideast_B	G1_Mideast_B	TRUE
EPI_ISL_93285	A/quail/Lebanon/272/2010	G1_Mideast_B	G1_Mideast_B	TRUE
EPI_ISL_69121	A/watercoot/Haryana/5844/2005	G1_Mideast_B	G1_Mideast_B	TRUE
EPI_ISL_63787	A/chicken/Afghanistan/329-8vir09-AFG-Heart7/2009	G1_Mideast_B	G1_Mideast_B	TRUE
EPI_ISL_29790	A/chicken/Pakistan/UDL-02/2006	G1_Mideast_B	G1_Mideast_B	TRUE
EPI_ISL_11186	A/chicken/Iran/B326/2005	G1_Mideast_B	G1_Mideast_B	TRUE
EPI_ISL_63458	A/chicken/Israel/449/2007	G1_Mideast_B	G1_Mideast_B	TRUE
EPI_ISL_64315	A/chicken/Israel/1548/2006	G1_Mideast_B	G1_Mideast_B	TRUE
EPI_ISL_29787	A/chicken/Pakistan/UDL-01/2005	G1_Mideast_B	G1_Mideast_B	TRUE
EPI_ISL_85791	A/chicken/Iran/10VIR854-5/2008	G1_Mideast_B	G1_Mideast_B	TRUE
EPI_ISL_29793	A/chicken/Pakistan/UDL-01/2008	G1_Mideast_B	G1_Mideast_B	TRUE
EPI_ISL_30444	A/turkey/Israel/689/2008	G1_Mideast_B	G1_Mideast_B	TRUE
EPI_ISL_63004	A/chicken/Iran/RZ36/2008	G1_Mideast_B	G1_Mideast_B	TRUE
EPI_ISL_78707	A/chicken/Uttar_Pradesh/2544/2004	G1_Mideast_B	G1_Mideast_B	TRUE
EPI_ISL_78706	A/chicken/Orissa/2317/2004	G1_Mideast_B	G1_Mideast_B	TRUE
EPI_ISL_76225	A/chicken/Uchal/8286/2006	G1_Mideast_B	G1_Mideast_B	TRUE
EPI_ISL_85790	A/chicken/Dubai/09vir3771-3/2008	G1_Mideast_B	G1_Mideast_B	TRUE
EPI_ISL_29789	A/chicken/Pakistan/UDL-01/2006	G1_Mideast_B	G1_Mideast_B	TRUE
EPI_ISL_63007	A/chicken/Iran/RZ53/2008	G1_Mideast_B	G1_Mideast_B	TRUE
EPI_ISL_11178	A/chicken/Iran/B314/2003	G1_Mideast_D	G1_Mideast_D	TRUE
EPI_ISL_64829	A/chicken/Iran/86/2005	G1_Mideast_D	G1_Mideast_D	TRUE
EPI_ISL_15734	A/chicken/Iran/TH78/1999	G1_Mideast_D	G1_Mideast_D	TRUE
EPI_ISL_68363	A/chicken/Iran/565/2000	G1_Mideast_D	G1_Mideast_D	TRUE
EPI_ISL_15736	A/chicken/Iran/TH80/2000	G1_Mideast_D	G1_Mideast_D	TRUE
EPI_ISL_68591	A/chicken/Iran/661/1998	G1_Mideast_D	G1_Mideast_D	TRUE
EPI_ISL_64828	A/chicken/Iran/119/2005	G1_Mideast_D	G1_Mideast_D	TRUE
EPI_ISL_65651	A/chicken/Iran/152/2004	G1_Mideast_D	G1_Mideast_D	TRUE
EPI_ISL_68496	A/chicken/Iran/705/1999	G1_Mideast_D	G1_Mideast_D	TRUE
EPI_ISL_2909	A/shovelar/Iran/G54/03	G1_Mideast_D	G1_Mideast_D	TRUE
EPI_ISL_85793	A/chicken/Iran/10VIR854-1/2002	G1_Mideast_D	G1_Mideast_D	TRUE
EPI_ISL_11179	A/chicken/Iran/B308A/2004	G1_Mideast_D	G1_Mideast_D	TRUE
EPI_ISL_68364	A/chicken/Iran/584/2000	G1_Mideast_D	G1_Mideast_D	TRUE
EPI_ISL_68019	A/chicken/Iran/233/2001	G1_Mideast_D	G1_Mideast_D	TRUE
EPI_ISL_70439	A/chicken/Korea/ADL060831/2006	KR38349	KR38349	TRUE
EPI_ISL_9886	A/chicken/Korea/S21/04	KR38349	KR38349	TRUE
EPI_ISL_70427	A/chicken/Korea/ADL060168/2006	KR38349	KR38349	TRUE
EPI_ISL_12597	A/Korea/KBNP-0028/2000	KR38349	KR38349	TRUE
EPI_ISL_84589	A/duck/Korea/SH0908/2009	KR38349	KR38349	TRUE
EPI_ISL_70436	A/chicken/Korea/ADL070801/2007	KR38349	KR38349	TRUE
EPI_ISL_70428	A/chicken/Korea/ADL060196/2006	KR38349	KR38349	TRUE
EPI_ISL_70429	A/chicken/Korea/ADL060580/2006	KR38349	KR38349	TRUE
EPI_ISL_68688	A/chicken/Korea/AI-96004/1996	KR38349	KR38349	TRUE
EPI_ISL_4617	A/swine/Korea/S452/2004	KR38349	KR38349	TRUE
EPI_ISL_84596	A/duck/Korea/SH0915/2009	KR38349	KR38349	TRUE
EPI_ISL_84583	A/chicken/Korea/SH0902/2009	KR38349	KR38349	TRUE
EPI_ISL_84582	A/chicken/Korea/HC09/2009	KR38349	KR38349	TRUE
EPI_ISL_70430	A/chicken/Korea/ADL060845/2006	KR38349	KR38349	TRUE
EPI_ISL_10141	A/chicken/Cheongju/ADL0401/2004	KR38349	KR38349	TRUE
EPI_ISL_70431	A/chicken/Korea/ADL060865/2006	KR38349	KR38349	TRUE
EPI_ISL_4668	A/chicken/Korea/S4/03	KR38349	KR38349	TRUE
EPI_ISL_70438	A/chicken/Korea/ADL070121/2007	KR38349	KR38349	TRUE
EPI_ISL_98907	A/duck/Korea/KNUDPJ09/2009	KR38349	KR38349	TRUE
EPI_ISL_4671	A/duck/Korea/S13/03	KR38349	KR38349	TRUE
EPI_ISL_70432	A/chicken/Korea/ADL062128/2006	KR38349	KR38349	TRUE
EPI_ISL_77209	A/chicken/Korea/A170/2009	KR38349	KR38349	TRUE
EPI_ISL_84585	A/duck/Korea/SH0904/2009	KR38349	KR38349	TRUE
EPI_ISL_84593	A/duck/Korea/SH0912/2009	KR38349	KR38349	TRUE
EPI_ISL_84581	A/chicken/Korea/SH0802/2008	KR38349	KR38349	TRUE
EPI_ISL_84588	A/chicken/Korea/SH0907/2009	KR38349	KR38349	TRUE
EPI_ISL_70424	A/chicken/Korea/ADL050895/2005	KR38349	KR38349	TRUE
EPI_ISL_84587	A/chicken/Korea/SH0906/2009	KR38349	KR38349	TRUE
EPI_ISL_1274	A/chicken/Korea/38349-p96323/96	KR38349	KR38349	TRUE
EPI_ISL_1275	A/chicken/Korea/25232-96006/96	KR38349	KR38349	TRUE
EPI_ISL_13845	A/chicken/Korea/01310/2001	KR38349	KR38349	TRUE
EPI_ISL_77207	A/duck/Korea/A174/2009	KR38349	KR38349	TRUE
EPI_ISL_84584	A/chicken/Korea/SH0903/2009	KR38349	KR38349	TRUE
EPI_ISL_99499	A/ruddy_turnstone/Delaware_Bay/2774/1987	MN5733	MN5733	TRUE
EPI_ISL_5800	A/laughing_gull/Delaware/2718/1987	MN5733	MN5733	TRUE
EPI_ISL_4047	A/mallard/Alberta/743/83	MN5733	MN5733	TRUE
EPI_ISL_8883	A/mallard_duck/ALB/321/1988	MN5733	MN5733	TRUE
EPI_ISL_85214	A/northern_shoveler/Interior_Alaska/8BM3470/2008	MN5733	MN5733	TRUE
EPI_ISL_4067	A/mallard/Alberta/11/91	MN5733	MN5733	TRUE
EPI_ISL_99486	A/ruddy_turnstone/Virginia/2297/1988	MN5733	MN5733	TRUE
EPI_ISL_1279	A/goose/Minnesota/5733/80	MN5733	MN5733	TRUE
EPI_ISL_8884	A/mallard/ALB/17/1991	MN5733	MN5733	TRUE
EPI_ISL_23347	A/turkey/TX/4-1-81/1981	MN5733	MN5733	TRUE
EPI_ISL_99339	A/laughing_gull/Delaware_Bay/5/2003	SB261	SB261	TRUE
EPI_ISL_30815	A/laughing_gull/Delaware/12/2006	SB261	SB261	TRUE
EPI_ISL_84624	A/shorebird/Delaware/554/2007	SB261	SB261	TRUE
EPI_ISL_245	A/duck/Hokkaido/9/99	VN340	VN340	TRUE
EPI_ISL_86201	A/mallard/Iran/T366/2007	VN340	VN340	TRUE
EPI_ISL_28844	A/duck/Hokkaido/238/2008	VN340	VN340	TRUE
EPI_ISL_11896	A/duck/Viet_Nam/68/2001	VN340	VN340	TRUE
EPI_ISL_98893	A/mallard/France/090360/2009	VN340	VN340	TRUE
EPI_ISL_63562	A/mallard/Switzerland/WV1070805/2007	VN340	VN340	TRUE
EPI_ISL_67395	A/duck/Mongolia/564/2003	VN340	VN340	TRUE
EPI_ISL_1488	A/ostrich/South_Africa/9508103/95	VN340	VN340	TRUE
EPI_ISL_247	A/duck/Hokkaido/13/00	VN340	VN340	TRUE
EPI_ISL_86202	A/mallard/Iran/T370/2007	VN340	VN340	TRUE
EPI_ISL_63563	A/mallard/Switzerland/WV3080008/2007	VN340	VN340	TRUE
EPI_ISL_11897	A/duck/Viet_Nam/340/2001	VN340	VN340	TRUE
EPI_ISL_94952	A/eastern_curlew/Stockton/4204/2008	VN340	VN340	TRUE
EPI_ISL_77452	A/mallard/PT/27972-B139/2007	VN340	VN340	TRUE
EPI_ISL_94965	A/black_swan/Morpeth/194/2008	VN340	VN340	TRUE
EPI_ISL_33856	A/gadwall/Netherlands/1/2006	VN340	VN340	TRUE
EPI_ISL_97999	A/chicken/Hainan/I28/2011	Y280_Fuj_SL6	Y280_Fuj_SL6	TRUE
EPI_ISL_89745	A/chicken/Guangdong/FLS/2011	Y280_Fuj_SL6	Y280_Fuj_SL6	TRUE
EPI_ISL_98010	A/chicken/Guizhou/G17/2011	Y280_Fuj_SL6	Y280_Fuj_SL6	TRUE
EPI_ISL_89748	A/chicken/Guangdong/HBQ/2011	Y280_Fuj_SL6	Y280_Fuj_SL6	TRUE
EPI_ISL_89739	A/chicken/Guangdong/LJD/2011	Y280_Fuj_SL6	Y280_Fuj_SL6	TRUE
EPI_ISL_98866	A/chicken/Guangdong/ZCY/2011	Y280_Fuj_SL6	Y280_Fuj_SL6	TRUE
EPI_ISL_99607	A/chicken/Guangdong/HMZ11/2011	Y280_Fuj_SL6	Y280_Fuj_SL6	TRUE
EPI_ISL_89731	A/chicken/Guangdong/YJX/2011	Y280_Fuj_SL6	Y280_Fuj_SL6	TRUE
EPI_ISL_98011	A/chicken/Guizhou/G12/2011	Y280_Fuj_SL6	Y280_Fuj_SL6	TRUE
EPI_ISL_98865	A/chicken/Guangdong/ZHJ/2011	Y280_Fuj_SL6	Y280_Fuj_SL6	TRUE
EPI_ISL_89720	A/chicken/Guangdong/WGH/2011	Y280_Fuj_SL6	Y280_Fuj_SL6	TRUE
EPI_ISL_99609	A/chicken/Guangxi/QCR10/2011	Y280_Fuj_SL6	Y280_Fuj_SL6	TRUE
EPI_ISL_89735	A/chicken/Guangdong/CJZ/2011	Y280_Fuj_SL6	Y280_Fuj_SL6	TRUE
EPI_ISL_89728	A/chicken/Guangdong/ZPY/2011	Y280_Fuj_SL6	Y280_Fuj_SL6	TRUE
EPI_ISL_99608	A/chicken/Guangdong/SQL11/2011	Y280_Fuj_SL6	Y280_Fuj_SL6	TRUE
EPI_ISL_98012	A/chicken/Guizhou/E11/2011	Y280_Fuj_SL6	Y280_Fuj_SL6	TRUE
EPI_ISL_89744	A/chicken/Guangdong/HYF/2011	Y280_Fuj_SL6	Y280_Fuj_SL6	TRUE
EPI_ISL_98007	A/chicken/Guizhou/H24/2011	Y280_Fuj_SL6	Y280_Fuj_SL6	TRUE
EPI_ISL_89721	A/chicken/Guangdong/FZH/2011	Y280_Fuj_SL6	Y280_Fuj_SL6	TRUE
EPI_ISL_89732	A/chicken/Guangdong/MYS/2011	Y280_Fuj_SL6	Y280_Fuj_SL6	TRUE
EPI_ISL_97658	A/chicken/Guangdong/265/2011	Y280_Fuj_SL6	Y280_Fuj_SL6	TRUE
EPI_ISL_97659	A/chicken/Guangdong/283/2011	Y280_Fuj_SL6	Y280_Fuj_SL6	TRUE
EPI_ISL_97688	A/chicken/Ningxia/181/2011	Y280_Fuj_SL6	Y280_Fuj_SL6	TRUE
EPI_ISL_97998	A/chicken/Hainan/I7/2011	Y280_Fuj_SL6	Y280_Fuj_SL6	TRUE
EPI_ISL_99612	A/chicken/Guangdong/FJC07/2011	Y280_Fuj_SL6	Y280_Fuj_SL6	TRUE
EPI_ISL_89717	A/chicken/Guangdong/LSD/2011	Y280_Fuj_SL6	Y280_Fuj_SL6	TRUE
EPI_ISL_89743	A/chicken/Guangdong/LJH/2011	Y280_Fuj_SL6	Y280_Fuj_SL6	TRUE
EPI_ISL_99611	A/chicken/Guizhou/LCY09/2011	Y280_Fuj_SL6	Y280_Fuj_SL6	TRUE
EPI_ISL_13015	A/bird/Guangxi/63/2005	Y280_G9	Y280_G9	TRUE
EPI_ISL_65630	A/chicken/Henan/2/2004	Y280_G9	Y280_G9	TRUE
EPI_ISL_70604	A/chicken/Guangxi/17/2007	Y280_G9	Y280_G9	TRUE
EPI_ISL_78799	A/chicken/Guangxi/KMIII/1999	Y280_G9	Y280_G9	TRUE
EPI_ISL_338	A/chicken/Yokohama/aq45/2002	Y280_G9	Y280_G9	TRUE
EPI_ISL_7474	A/chicken/Shantou/859/2000	Y280_G9	Y280_G9	TRUE
EPI_ISL_82537	A/chicken/Shandong/SD0014/2008	Y280_G9	Y280_G9	TRUE
EPI_ISL_82191	A/chicken/Shandong/1/2008	Y280_G9	Y280_G9	TRUE
EPI_ISL_64827	A/chicken/Henan/1/2005	Y280_G9	Y280_G9	TRUE
EPI_ISL_97019	A/environment/Hong_Kong/1226/1999	Y280_G9	Y280_G9	TRUE
EPI_ISL_70609	A/sparrow/Guangxi/09/2005	Y280_G9	Y280_G9	TRUE
EPI_ISL_70614	A/sparrow/Guangxi/121/2007	Y280_G9	Y280_G9	TRUE
EPI_ISL_70606	A/chicken/Guangxi/39/2007	Y280_G9	Y280_G9	TRUE
EPI_ISL_68599	A/chicken/Jiangsu/1/1998	Y280_G9	Y280_G9	TRUE
EPI_ISL_24998	A/chicken/Shanghai/3/2000	Y280_G9	Y280_G9	TRUE
EPI_ISL_67729	A/chicken/Jiangsu/1/2002	Y280_G9	Y280_G9	TRUE
EPI_ISL_2152	A/chicken/Jiangsu/2/98	Y280_G9	Y280_G9	TRUE
EPI_ISL_68025	A/chicken/Jiangsu/2/2001	Y280_G9	Y280_G9	TRUE
EPI_ISL_68684	A/chicken/Guangdong/97_	Y280_G9	Y280_G9	TRUE
EPI_ISL_8501	A/chicken/Guangxi/10/99	Y280_G9	Y280_G9	TRUE
EPI_ISL_3092	A/chicken/Shanghai/3/01	Y280_G9	Y280_G9	TRUE
EPI_ISL_24918	A/chicken/Henan/01/2007	Y280_G9	Y280_G9	TRUE
EPI_ISL_3199	A/quail/Nanchang/2-0460/2000	Y280_G9	Y280_G9	TRUE
EPI_ISL_70608	A/chicken/Guangxi/101/2006	Y280_G9	Y280_G9	TRUE
EPI_ISL_93811	A/chicken/Henan/N3/2002	Y280_G9	Y280_G9	TRUE
EPI_ISL_70613	A/sparrow/Guangxi/93/2006	Y280_G9	Y280_G9	TRUE
EPI_ISL_29377	A/duck/Hong_Kong/W213/1997	Y280_G9	Y280_G9	TRUE
EPI_ISL_84311	A/swine/Shandong/3/2003	Y280_G9	Y280_G9	TRUE
EPI_ISL_13021	A/bird/Guangxi/H1/2006	Y280_G9	Y280_G9	TRUE
EPI_ISL_2157	A/chicken/Hebei/1/00	Y280_G9	Y280_G9	TRUE
EPI_ISL_8514	A/chicken/Shanghai/10/01	Y280_G9	Y280_G9	TRUE
EPI_ISL_77228	A/chicken/Shandong/JN4/2005	Y280_G9	Y280_G9	TRUE
EPI_ISL_2151	A/chicken/Jiangsu/1/99	Y280_G9	Y280_G9	TRUE
EPI_ISL_2443	A/chicken/Hebei/1/96	Y280_G9	Y280_G9	TRUE
EPI_ISL_2239	A/chicken/Sichuan/5/97	Y280_G9	Y280_G9	TRUE
EPI_ISL_2242	A/chicken/Shenzhen/9/97	Y280_G9	Y280_G9	TRUE
EPI_ISL_7382	A/chicken/Yunnan/401/2002	Y280_G9	Y280_G9	TRUE
EPI_ISL_24712	A/chicken/Shandong/2/2003	Y280_G9	Y280_G9	TRUE
EPI_ISL_8500	A/chicken/Guangdong/6/97	Y280_G9	Y280_G9	TRUE
EPI_ISL_1264	A/chicken/Hong_Kong/G23/97	Y280_G9	Y280_G9	TRUE
EPI_ISL_3093	A/chicken/Shanghai/4/01	Y280_G9	Y280_G9	TRUE
EPI_ISL_8498	A/chicken/Guangdong/5/97	Y280_G9	Y280_G9	TRUE
EPI_ISL_335	A/chicken/Kobe/aq26/2001	Y280_G9	Y280_G9	TRUE
EPI_ISL_68726	A/chicken/Guangdong/SS/94	Y280_G9	Y280_G9	TRUE
EPI_ISL_25003	A/chicken/Shanghai/14/2001	Y280_G9	Y280_G9	TRUE
EPI_ISL_25001	A/chicken/Shanghai/7/2001	Y280_G9	Y280_G9	TRUE
EPI_ISL_68578	A/chicken/Shandong/98	Y280_G9	Y280_G9	TRUE
EPI_ISL_25002	A/chicken/Shanghai/12/2001	Y280_G9	Y280_G9	TRUE
EPI_ISL_2167	A/chicken/Tianjing/2/96	Y280_G9	Y280_G9	TRUE
EPI_ISL_7472	A/chicken/Shantou/94/2000	Y280_G9	Y280_G9	TRUE
EPI_ISL_68502	A/chicken/Jiangsu/1/1999	Y280_G9	Y280_G9	TRUE
EPI_ISL_1265	A/Pigeon/Hong_Kong/Y233/97	Y280_G9	Y280_G9	TRUE
EPI_ISL_2163	A/chicken/Shanghai/3/00	Y280_G9	Y280_G9	TRUE
EPI_ISL_93809	A/chicken/Henan/N12/2009	Y280_G9	Y280_G9	TRUE
EPI_ISL_7389	A/chicken/Yunnan/3727/2004	Y280_G9	Y280_G9	TRUE
EPI_ISL_24724	A/chicken/Hebei/sjz2/2001	Y280_G9	Y280_G9	TRUE
EPI_ISL_2238	A/chicken/Ningxia/5/99	Y280_G9	Y280_G9	TRUE
EPI_ISL_84312	A/swine/Shandong/8/2003	Y280_G9	Y280_G9	TRUE
EPI_ISL_13017	A/bird/Guangxi/83/2005	Y280_G9	Y280_G9	TRUE
EPI_ISL_2166	A/chicken/Tianjing/1/96	Y280_G9	Y280_G9	TRUE
EPI_ISL_84313	A/chicken/Shandong/2h/2001	Y280_G9	Y280_G9	TRUE
EPI_ISL_7366	A/chicken/Guangxi/187/2005	Y280_G9	Y280_G9	TRUE
EPI_ISL_90381	A/chicken/Jiangsu/01/2003	Y280_G9	Y280_G9	TRUE
EPI_ISL_3446	A/chicken/Beijing/1/00	Y280_G9	Y280_G9	TRUE
EPI_ISL_67426	A/swine/Shandong/fHZ/2003	Y280_G9	Y280_G9	TRUE
EPI_ISL_13020	A/swine/Guangxi/FS2/2005	Y280_G9	Y280_G9	TRUE
EPI_ISL_7386	A/chicken/Yunnan/5653/2003	Y280_G9	Y280_G9	TRUE
EPI_ISL_67726	A/chicken/Hunan/774/2002	Y280_G9	Y280_G9	TRUE
EPI_ISL_13018	A/quail/Guangxi/B1/2006	Y280_G9	Y280_G9	TRUE
EPI_ISL_333	A/chicken/Osaka/aq48/97	Y280_G9	Y280_G9	TRUE
EPI_ISL_13010	A/chicken/Guangxi/37/2005	Y280_G9	Y280_G9	TRUE
EPI_ISL_141	A/swine/Hong_Kong/10/98	Y280_G9	Y280_G9	TRUE
EPI_ISL_77229	A/chicken/Shandong/JN5/2005	Y280_G9	Y280_G9	TRUE
EPI_ISL_34046	A/duck/Jiangsu/9/2004	Y280_G9	Y280_G9	TRUE
EPI_ISL_2169	A/chicken/Yunnan/2/00	Y280_G9	Y280_G9	TRUE
EPI_ISL_337	A/chicken/Osaka/aq69/2001	Y280_G9	Y280_G9	TRUE
EPI_ISL_13016	A/bird/Guangxi/82/2005	Y280_G9	Y280_G9	TRUE
EPI_ISL_2441	A/chicken/Beijing/3/99	Y280_G9	Y280_G9	TRUE
EPI_ISL_12580	A/swine/Guangxi/58/2005	Y280_G9	Y280_G9	TRUE
EPI_ISL_2243	A/duck/Nanjing/1/97	Y280_G9	Y280_G9	TRUE
EPI_ISL_65629	A/chicken/Henan/1/2004	Y280_G9	Y280_G9	TRUE
EPI_ISL_2164	A/chicken/Shanghai/4-1/01	Y280_G9	Y280_G9	TRUE
EPI_ISL_339	A/chicken/Yokohama/aq134/2002	Y280_G9	Y280_G9	TRUE
EPI_ISL_3692	A/chicken/Mudanjiang/0823/2000	Y280_G9	Y280_G9	TRUE
EPI_ISL_7475	A/chicken/Shantou/1322/2000	Y280_G9	Y280_G9	TRUE
EPI_ISL_84317	A/chicken/Anhui/2h/2002	Y280_G9	Y280_G9	TRUE
EPI_ISL_65631	A/chicken/Jiangsu/1/2004	Y280_G9	Y280_G9	TRUE
EPI_ISL_24717	A/chicken/Fujian/2/2002	Y280_G9	Y280_G9	TRUE
EPI_ISL_2165	A/chicken/Shanghai/4-2/01	Y280_G9	Y280_G9	TRUE
EPI_ISL_76661	A/chicken/Hebei/A/2007	Y280_Sha_ZB07	Y280_Sha_ZB07	TRUE
EPI_ISL_76662	A/chicken/Hebei/Y2/2009	Y280_Sha_ZB07	Y280_Sha_ZB07	TRUE
EPI_ISL_7476	A/chicken/Shantou/1579/2000	Y280B	Y280B	TRUE
EPI_ISL_11296	A/quail/Shantou/786/2002	Y280B	Y280B	TRUE
EPI_ISL_97844	A/chicken/Ningxia/A21/2011	Y280B	Y280B	TRUE
EPI_ISL_97700	A/chicken/Henan/D17/2011	Y280B	Y280B	TRUE
EPI_ISL_84539	A/duck/Honghe/111/2009	Y280B	Y280B	TRUE
EPI_ISL_97682	A/chicken/Hubei/558/2011	Y280B	Y280B	TRUE
EPI_ISL_97604	A/duck/Guangdong/G24/2010	Y280B	Y280B	TRUE
EPI_ISL_97759	A/goose/Jilin/K5/2011	Y280B	Y280B	TRUE
EPI_ISL_7301	A/chicken/Shantou/1689/2003	Y280B	Y280B	TRUE
EPI_ISL_97769	A/chicken/Shanxi/K1/2011	Y280B	Y280B	TRUE
EPI_ISL_83290	A/chicken/Guizhou/Q16/2009	Y280B	Y280B	TRUE
EPI_ISL_69420	A/duck/Guangdong/810/2009	Y280B	Y280B	TRUE
EPI_ISL_97543	A/chicken/Hubei/D17/2010	Y280B	Y280B	TRUE
EPI_ISL_97907	A/chicken/Henan/I23/2011	Y280B	Y280B	TRUE
EPI_ISL_19166	A/goose/Yunnan/chuxiong07/07	Y280B	Y280B	TRUE
EPI_ISL_9793	A/Ck/HK/YU577/2003	Y280B	Y280B	TRUE
EPI_ISL_97823	A/chicken/Shandong/WE26/2011	Y280B	Y280B	TRUE
EPI_ISL_97557	A/chicken/Jiangsu/H25/2010	Y280B	Y280B	TRUE
EPI_ISL_84334	A/duck/Beijing/MG0617/2005	Y280B	Y280B	TRUE
EPI_ISL_89726	A/chicken/Zhejiang/FSQ/2011	Y280B	Y280B	TRUE
EPI_ISL_336	A/chicken/Osaka/aq58/2001	Y280B	Y280B	TRUE
EPI_ISL_11328	A/quail/Shantou/7397/2004	Y280B	Y280B	TRUE
EPI_ISL_7328	A/chicken/Shantou/55/2005	Y280B	Y280B	TRUE
EPI_ISL_7295	A/chicken/Shantou/4342/2002	Y280B	Y280B	TRUE
EPI_ISL_29161	A/chicken/Anhui/AH16/2008	Y280B	Y280B	TRUE
EPI_ISL_7320	A/chicken/Shantou/5630/2004	Y280B	Y280B	TRUE
EPI_ISL_69735	A/Hong_Kong/3239/2008	Y280B	Y280B	TRUE
EPI_ISL_29164	A/chicken/Anhui/AK13/2008	Y280B	Y280B	TRUE
EPI_ISL_83298	A/chicken/Guangdong/L14/2009	Y280B	Y280B	TRUE
EPI_ISL_24709	A/chicken/Henan/1/2001	Y280B	Y280B	TRUE
EPI_ISL_11327	A/quail/Shantou/6794/2004	Y280B	Y280B	TRUE
EPI_ISL_7327	A/chicken/Shantou/7920/2004	Y280B	Y280B	TRUE
EPI_ISL_98297	A/chicken/Hubei/J9/2009	Y280B	Y280B	TRUE
EPI_ISL_7491	A/chicken/Shantou/5028/2001	Y280B	Y280B	TRUE
EPI_ISL_89652	A/chicken/Fujian/G9/2009	Y280B	Y280B	TRUE
EPI_ISL_97592	A/chicken/Anhui/A25/2010	Y280B	Y280B	TRUE
EPI_ISL_99619	A/chicken/Guangdong/DJN03/2011	Y280B	Y280B	TRUE
EPI_ISL_84541	A/chicken/Wenshan/412/2009	Y280B	Y280B	TRUE
EPI_ISL_97245	A/chicken/Shandong/M/2010	Y280B	Y280B	TRUE
EPI_ISL_70194	A/feces/Hunan/3-91/2007	Y280B	Y280B	TRUE
EPI_ISL_7483	A/chicken/Shantou/1608/2001	Y280B	Y280B	TRUE
EPI_ISL_4459	A/chicken/HongKong/SF1/03	Y280B	Y280B	TRUE
EPI_ISL_98327	A/chicken/Guangdong/P26/2009	Y280B	Y280B	TRUE
EPI_ISL_7313	A/chicken/Shantou/1138/2004	Y280B	Y280B	TRUE
EPI_ISL_9792	A/Ck/HK/YU463/2003	Y280B	Y280B	TRUE
EPI_ISL_97517	A/chicken/Hubei/G21/2010	Y280B	Y280B	TRUE
EPI_ISL_97523	A/chicken/Hubei/G5/2010	Y280B	Y280B	TRUE
EPI_ISL_7331	A/silky_chicken/Shantou/2131/2005	Y280B	Y280B	TRUE
EPI_ISL_84330	A/chicken/Hebei/0329/2007	Y280B	Y280B	TRUE
EPI_ISL_19170	A/chicken/Yunnan/qujing09/07	Y280B	Y280B	TRUE
EPI_ISL_98221	A/chicken/Tianjin/F17/2009	Y280B	Y280B	TRUE
EPI_ISL_97858	A/chicken/Jiangsu/H2/2011	Y280B	Y280B	TRUE
EPI_ISL_7390	A/duck/Shantou/3549/2001	Y280B	Y280B	TRUE
EPI_ISL_24711	A/chicken/Henan/622/2006	Y280B	Y280B	TRUE
EPI_ISL_69425	A/chicken/Guangdong/A3/2003	Y280B	Y280B	TRUE
EPI_ISL_97648	A/duck/Anhui/B24/2010	Y280B	Y280B	TRUE
EPI_ISL_97672	A/chicken/Chongqing/K7/2011	Y280B	Y280B	TRUE
EPI_ISL_97973	A/chicken/Henan/E18/2011	Y280B	Y280B	TRUE
EPI_ISL_29149	A/chicken/Hunan/HB25/2007	Y280B	Y280B	TRUE
EPI_ISL_97521	A/chicken/Hubei/G9/2010	Y280B	Y280B	TRUE
EPI_ISL_24730	A/chicken/Shandong/zc820/2006	Y280B	Y280B	TRUE
EPI_ISL_98295	A/chicken/Hubei/N11/2009	Y280B	Y280B	TRUE
EPI_ISL_97670	A/chicken/Chongqing/K3/2011	Y280B	Y280B	TRUE
EPI_ISL_97515	A/chicken/Guangdong/D2/2010	Y280B	Y280B	TRUE
EPI_ISL_9794	A/SCk/HK/YU663/2003	Y280B	Y280B	TRUE
EPI_ISL_97566	A/chicken/Jiangsu/A13/2010	Y280B	Y280B	TRUE
EPI_ISL_342	A/chicken/Osaka/aq19/2001	Y280B	Y280B	TRUE
EPI_ISL_7294	A/chicken/Shantou/4144/2002	Y280B	Y280B	TRUE
EPI_ISL_341	A/chicken/Yokohama/aq120/2001	Y280B	Y280B	TRUE
EPI_ISL_82193	A/chicken/Shandong/C/2009	Y280B	Y280B	TRUE
EPI_ISL_83296	A/chicken/Tibet/L18/2009	Y280B	Y280B	TRUE
EPI_ISL_83287	A/chicken/Shanxi/H14/2009	Y280B	Y280B	TRUE
EPI_ISL_83297	A/chicken/Guangdongg/G9/2009	Y280B	Y280B	TRUE
EPI_ISL_83288	A/chicken/Guizhou/D26/2009	Y280B	Y280B	TRUE
EPI_ISL_29148	A/chicken/Hunan/HB29/2007	Y280B	Y280B	TRUE
EPI_ISL_7455	A/partridge/Shantou/7075/2004	Y280B	Y280B	TRUE
EPI_ISL_7302	A/chicken/Shantou/2686/2003	Y280B	Y280B	TRUE
EPI_ISL_8510	A/chicken/Jiangsu/1/00	Y280B	Y280B	TRUE
EPI_ISL_29150	A/chicken/Hunan/HA17/2007	Y280B	Y280B	TRUE
EPI_ISL_29163	A/chicken/Anhui/AI16/2008	Y280B	Y280B	TRUE
EPI_ISL_69415	A/chicken/Guangdong/A7/2002	Y280B	Y280B	TRUE
EPI_ISL_84544	A/chicken/Baoshan/711/2008	Y280B	Y280B	TRUE
EPI_ISL_89730	A/chicken/Hubei/HWC/2011	Y280B	Y280B	TRUE
EPI_ISL_7398	A/Guinea_fowl/Shantou/1677/2000	Y280B	Y280B	TRUE
EPI_ISL_97508	A/chicken/Guangdong/H28/2010	Y280B	Y280B	TRUE
EPI_ISL_98236	A/chicken/Guangdong/Y12/2009	Y280B	Y280B	TRUE
EPI_ISL_24722	A/chicken/Guangdong/22/2001	Y280B	Y280B	TRUE
EPI_ISL_98306	A/chicken/Guangdong/Y8/2009	Y280B	Y280B	TRUE
EPI_ISL_69419	A/chicken/Guangdong/B7/2003	Y280B	Y280B	TRUE
EPI_ISL_7291	A/chicken/Shantou/439/2002	Y280B	Y280B	TRUE
EPI_ISL_98234	A/chicken/Guangdong/R17/2009	Y280B	Y280B	TRUE
EPI_ISL_29147	A/chicken/Hunan/HG29/2007	Y280B	Y280B	TRUE
EPI_ISL_7371	A/chicken/Guangxi/4745/2005	Y280B	Y280B	TRUE
EPI_ISL_97575	A/chicken/Guizhou/E9/2010	Y280B	Y280B	TRUE
EPI_ISL_69411	A/chicken/Guangdong/E25/2008	Y280B	Y280B	TRUE
EPI_ISL_84546	A/chicken/Lincang/711/2008	Y280B	Y280B	TRUE
EPI_ISL_11335	A/quail/Shantou/8993/2005	Y280B	Y280B	TRUE
EPI_ISL_7479	A/chicken/Shantou/2098/2000	Y280B	Y280B	TRUE
EPI_ISL_98223	A/chicken/Guangdong/P20/2009	Y280B	Y280B	TRUE
EPI_ISL_97725	A/chicken/Anhui/K3-2/2011	Y280B	Y280B	TRUE
EPI_ISL_98034	A/chicken/Chongqing/G10/2011	Y280B	Y280B	TRUE
EPI_ISL_77201	A/chicken/Shandong/SG1/2009	Y280B	Y280B	TRUE
EPI_ISL_98302	A/chicken/Guangdong/B16/2009	Y280B	Y280B	TRUE
EPI_ISL_97632	A/chicken/Henan/E2/2010	Y280B	Y280B	TRUE
EPI_ISL_4464	A/pheasant/HongKong/WF54/03	Y280B	Y280B	TRUE
EPI_ISL_97602	A/chicken/Shandong/TH9/2010	Y280B	Y280B	TRUE
EPI_ISL_97528	A/chicken/Hubei/E23/2010	Y280B	Y280B	TRUE
EPI_ISL_7297	A/chicken/Shantou/69/2003	Y280B	Y280B	TRUE
EPI_ISL_97560	A/chicken/Jiangsu/H11/2010	Y280B	Y280B	TRUE
EPI_ISL_97625	A/chicken/Henan/G1/2010	Y280B	Y280B	TRUE
EPI_ISL_97247	A/chicken/Shandong/K/2010	Y280B	Y280B	TRUE
EPI_ISL_93624	A/canine/Guangxi/1/2011/H9N2	Y280B	Y280B	TRUE
EPI_ISL_2159	A/chicken/Liaoning/1/00	Y280B	Y280B	TRUE
EPI_ISL_24740	A/chicken/Shandong/lx1129/2007	Y280B	Y280B	TRUE
EPI_ISL_7341	A/chicken/Shantou/22054/2005	Y280B	Y280B	TRUE
EPI_ISL_84440	A/swine/Yangzhou/1/2008	Y280B	Y280B	TRUE
EPI_ISL_24742	A/chicken/Shandong/yt1105/2007	Y280B	Y280B	TRUE
EPI_ISL_97845	A/chicken/Ningxia/A2/2011	Y280B	Y280B	TRUE
EPI_ISL_97510	A/chicken/Guangdong/H11/2010	Y280B	Y280B	TRUE
EPI_ISL_98347	A/chicken/Jilin/M19/2009	Y280B	Y280B	TRUE
EPI_ISL_7490	A/chicken/Shantou/4208/2001	Y280B	Y280B	TRUE
EPI_ISL_7318	A/chicken/Shantou/2994/2004	Y280B	Y280B	TRUE
EPI_ISL_69400	A/duck/Fujian/T14/2007	Y280B	Y280B	TRUE
EPI_ISL_97917	A/chicken/Henan/H24/2011	Y280B	Y280B	TRUE
EPI_ISL_63471	A/chicken/Zhejiang/HJ/2007	Y280B	Y280B	TRUE
EPI_ISL_97617	A/chicken/Henan/G15/2010	Y280B	Y280B	TRUE
EPI_ISL_89714	A/chicken/Anhui/GQY/2011	Y280B	Y280B	TRUE
EPI_ISL_4461	A/chicken/HongKong/TP38/03	Y280B	Y280B	TRUE
EPI_ISL_97246	A/chicken/Shandong/L/2010	Y280B	Y280B	TRUE
EPI_ISL_9789	A/Ck/HK/NT142/2003	Y280B	Y280B	TRUE
EPI_ISL_29156	A/chicken/Fujian/FB21/2007	Y280B	Y280B	TRUE
EPI_ISL_99618	A/chicken/Jiangsu/FQD03/2011	Y280B	Y280B	TRUE
EPI_ISL_80509	A/chicken/Shandong/A1/2009	Y280B	Y280B	TRUE
EPI_ISL_7330	A/silky_chicken/Shantou/1169/2005	Y280B	Y280B	TRUE
EPI_ISL_89742	A/chicken/Guangxi/MFX/2011	Y280B	Y280B	TRUE
EPI_ISL_24744	A/chicken/Sichuan/bs1210/2007	Y280B	Y280B	TRUE
EPI_ISL_89734	A/chicken/Jiangsu/WXY/2011	Y280B	Y280B	TRUE
EPI_ISL_89740	A/chicken/Jiangsu/LWC/2011	Y280B	Y280B	TRUE
EPI_ISL_84320	A/chicken/Shandong/LY/2006	Y280B	Y280B	TRUE
EPI_ISL_77202	A/chicken/Shandong/SG2/2009	Y280B	Y280B	TRUE
EPI_ISL_98004	A/chicken/Hainan/A4/2011	Y280B	Y280B	TRUE
EPI_ISL_7298	A/chicken/Shantou/944/2003	Y280B	Y280B	TRUE
EPI_ISL_7406	A/duck/Shantou/12560/2005	Y280B	Y280B	TRUE
EPI_ISL_7314	A/silky_chicken/Shantou/1826/2004	Y280B	Y280B	TRUE
EPI_ISL_98330	A/chicken/Ningxia/N22/2009	Y280B	Y280B	TRUE
EPI_ISL_97750	A/chicken/Anhui/D3/2011	Y280B	Y280B	TRUE
EPI_ISL_69417	A/chicken/Guangdong/B9/2002	Y280B	Y280B	TRUE
EPI_ISL_89650	A/chicken/Jiangsu/Q3/2010	Y280B	Y280B	TRUE
EPI_ISL_97696	A/chicken/Ningxia/31/2011	Y280B	Y280B	TRUE
EPI_ISL_84439	A/swine/Taizhou/5/2008	Y280B	Y280B	TRUE
EPI_ISL_7339	A/chicken/Shantou/19465/2005	Y280B	Y280B	TRUE
EPI_ISL_89115	A/chicken/Tibet/S4/2009	Y280B	Y280B	TRUE
EPI_ISL_97249	A/chicken/Shandong/B/2009	Y280B	Y280B	TRUE
EPI_ISL_84329	A/chicken/Hebei/0617/2007	Y280B	Y280B	TRUE
EPI_ISL_97738	A/chicken/Anhui/F31/2011	Y280B	Y280B	TRUE
EPI_ISL_84545	A/chicken/Yunnandh/101/2008	Y280B	Y280B	TRUE
EPI_ISL_99613	A/chicken/Anhui/ZYX05/2011	Y280B	Y280B	TRUE
EPI_ISL_69428	A/chicken/Guangdong/B2/2006	Y280B	Y280B	TRUE
EPI_ISL_84325	A/chicken/Jiangxi/12/2007	Y280B	Y280B	TRUE
EPI_ISL_7431	A/pheasant/Shantou/45/2004	Y280B	Y280B	TRUE
EPI_ISL_70193	A/feces/Hunan/2-28/2007	Y280B	Y280B	TRUE
EPI_ISL_97569	A/chicken/Jiangsu/A7/2010	Y280B	Y280B	TRUE
EPI_ISL_98069	A/chicken/Anhui/I24/2011	Y280B	Y280B	TRUE
EPI_ISL_89648	A/chicken/Guangdong/Q6/2010	Y280B	Y280B	TRUE
EPI_ISL_89711	A/chicken/Zhejiang/SYX/2010	Y280B	Y280B	TRUE
EPI_ISL_98217	A/chicken/Guangdong/J22/2009	Y280B	Y280B	TRUE
EPI_ISL_24737	A/chicken/Shandong/lx1023/2007	Y280B	Y280B	TRUE
EPI_ISL_69424	A/chicken/Guangdong/HE12/2008	Y280B	Y280B	TRUE
EPI_ISL_89646	A/chicken/Jiangsu/U1/2010	Y280B	Y280B	TRUE
EPI_ISL_2235	A/chicken/Hebei/4/98	Y280B	Y280B	TRUE
EPI_ISL_77199	A/chicken/Shandong/WL/2009	Y280B	Y280B	TRUE
EPI_ISL_7380	A/chicken/Hunan/5700/2005	Y280B	Y280B	TRUE
EPI_ISL_69409	A/chicken/Guangdong/E23/2008	Y280B	Y280B	TRUE
EPI_ISL_69436	A/chicken/Zhejiang/HF5/2009	Y280B	Y280B	TRUE
EPI_ISL_97568	A/chicken/Jiangsu/A9/2010	Y280B	Y280B	TRUE
EPI_ISL_89114	A/chicken/Tibet/S1/2009	Y280B	Y280B	TRUE
EPI_ISL_97812	A/chicken/Shandong/WG10/2011	Y280B	Y280B	TRUE
EPI_ISL_7456	A/pheasant/Shantou/7315/2004	Y280B	Y280B	TRUE
EPI_ISL_97512	A/chicken/Guangdong/D8/2010	Y280B	Y280B	TRUE
EPI_ISL_3044	A/Shaoguan/408/98	Y280B	Y280B	TRUE
EPI_ISL_97869	A/chicken/Jiangsu/B3/2011	Y280B	Y280B	TRUE
EPI_ISL_98268	A/chicken/Jilin/Y20/2009	Y280B	Y280B	TRUE
EPI_ISL_7423	A/pheasant/Shantou/4340/2003	Y280B	Y280B	TRUE
EPI_ISL_97583	A/chicken/Henan/A16/2010	Y280B	Y280B	TRUE
EPI_ISL_343	A/chicken/Yokohama/aq144/2001	Y280B	Y280B	TRUE
EPI_ISL_69403	A/chicken/Sichuan/G3/2009	Y280B	Y280B	TRUE
EPI_ISL_7303	A/chicken/Shantou/3040/2003	Y280B	Y280B	TRUE
EPI_ISL_97958	A/chicken/Henan/F16/2011	Y280B	Y280B	TRUE
EPI_ISL_7332	A/partridge/Shantou/49/2002	Y280B	Y280B	TRUE
EPI_ISL_7296	A/chicken/Shantou/4608/2002	Y280B	Y280B	TRUE
EPI_ISL_100152	A/duck/Fujian/FQ2/2007	Y280B	Y280B	TRUE
EPI_ISL_29160	A/chicken/Liaoning/3/2007	Y280B	Y280B	TRUE
EPI_ISL_97532	A/chicken/Hubei/E18/2010	Y280B	Y280B	TRUE
EPI_ISL_84326	A/chicken/Hebei/LC/2008	Y280B	Y280B	TRUE
EPI_ISL_69398	A/chicken/Hubei/HE27/2008	Y280B	Y280B	TRUE
EPI_ISL_69426	A/chicken/Guangdong/A5/2003	Y280B	Y280B	TRUE
EPI_ISL_97564	A/chicken/Jiangsu/H4/2010	Y280B	Y280B	TRUE
EPI_ISL_97978	A/chicken/Henan/E10/2011	Y280B	Y280B	TRUE
EPI_ISL_77230	A/chicken/Shandong/JN/1999	Y280B	Y280B	TRUE
EPI_ISL_97679	A/chicken/Hubei/661/2011	Y280B	Y280B	TRUE
EPI_ISL_70605	A/chicken/Guangxi/21/2006	Y280B	Y280B	TRUE
EPI_ISL_7485	A/chicken/Shantou/1890/2001	Y280B	Y280B	TRUE
EPI_ISL_11315	A/quail/Shantou/3856/2003	Y280B	Y280B	TRUE
EPI_ISL_24732	A/chicken/Shandong/lc1124/2007	Y280B	Y280B	TRUE
EPI_ISL_29152	A/chicken/Fujian/FH7/2007	Y280B	Y280B	TRUE
EPI_ISL_7293	A/chicken/Shantou/2204/2002	Y280B	Y280B	TRUE
EPI_ISL_84536	A/chicken/Baoshan/111/2009	Y280B	Y280B	TRUE
EPI_ISL_83291	A/chicken/Jilin/G12/2009	Y280B	Y280B	TRUE
EPI_ISL_84327	A/chicken/Hebei/C6/2007	Y280B	Y280B	TRUE
EPI_ISL_97830	A/chicken/Shandong/WE11/2011	Y280B	Y280B	TRUE
EPI_ISL_69423	A/chicken/Guangdong/HE20/2008	Y280B	Y280B	TRUE
EPI_ISL_74004	A/chicken/Sandong/Li/2008	Y280B	Y280B	TRUE
EPI_ISL_7484	A/chicken/Shantou/1610/2001	Y280B	Y280B	TRUE
EPI_ISL_7391	A/duck/Shantou/5401/2001	Y280B	Y280B	TRUE
EPI_ISL_97971	A/chicken/Henan/E21/2011	Y280B	Y280B	TRUE
EPI_ISL_98348	A/chicken/Jilin/2/2009	Y280B	Y280B	TRUE
EPI_ISL_98006	A/chicken/Hainan/A13/2011	Y280B	Y280B	TRUE
EPI_ISL_84540	A/chicken/Dehong/411/2009	Y280B	Y280B	TRUE
EPI_ISL_97870	A/chicken/Jiangsu/B27/2011	Y280B	Y280B	TRUE
EPI_ISL_7337	A/chicken/Shantou/14907/2005	Y280B	Y280B	TRUE
EPI_ISL_7400	A/duck/Shantou/3577/2003	Y280B	Y280B	TRUE
EPI_ISL_84548	A/chicken/Yunnanbn/411/2009	Y280B	Y280B	TRUE
EPI_ISL_77226	A/chicken/Guangzhou/GZ/2005	Y280B	Y280B	TRUE
EPI_ISL_97734	A/chicken/Anhui/G18/2011	Y280B	Y280B	TRUE
EPI_ISL_11273	A/quail/Shantou/1820/2000	Y280B	Y280B	TRUE
EPI_ISL_7480	A/chicken/Shantou/1126/2001	Y280B	Y280B	TRUE
EPI_ISL_89733	A/chicken/Fujian/SL4/2011	Y280B	Y280B	TRUE
EPI_ISL_84318	A/duck/Beijing/31/2005	Y280B	Y280B	TRUE
EPI_ISL_13771	A/chicken/Yunnan/Yuxi2/2007	Y280B	Y280B	TRUE
EPI_ISL_69399	A/duck/Fujian/T7/2007	Y280B	Y280B	TRUE
EPI_ISL_98240	A/chicken/Guangdong/R24/2009	Y280B	Y280B	TRUE
EPI_ISL_97561	A/chicken/Jiangsu/H10/2010	Y280B	Y280B	TRUE
EPI_ISL_29143	A/chicken/Yunnan/YC12/2007	Y280B	Y280B	TRUE
EPI_ISL_89645	A/chicken/Jiangsu/U2/2010	Y280B	Y280B	TRUE
EPI_ISL_97590	A/chicken/Anhui/B17-2/2010	Y280B	Y280B	TRUE
EPI_ISL_98031	A/chicken/Chongqing/G14/2011	Y280B	Y280B	TRUE
EPI_ISL_29146	A/chicken/Xinjiang/XJ75/2007	Y280B	Y280B	TRUE
EPI_ISL_7481	A/chicken/Shantou/1205/2001	Y280B	Y280B	TRUE
EPI_ISL_69438	A/chicken/Zhejiang/HF4/2009	Y280B	Y280B	TRUE
EPI_ISL_97608	A/duck/Guangdong/G20/2010	Y280B	Y280B	TRUE
EPI_ISL_70192	A/environment/Hunan/5-38/2007	Y280B	Y280B	TRUE
EPI_ISL_4458	A/chicken/HongKong/NT142/03	Y280B	Y280B	TRUE
EPI_ISL_97582	A/chicken/Guizhou/A4/2010	Y280B	Y280B	TRUE
EPI_ISL_11334	A/quail/Shantou/5011/2005	Y280B	Y280B	TRUE
EPI_ISL_24741	A/chicken/Shandong/mp1224/2007	Y280B	Y280B	TRUE
EPI_ISL_83491	A/duck/Fujian/FQ107/2007	Y280B	Y280B	TRUE
EPI_ISL_10593	A/swine/Henan/2/2004	Y280B	Y280B	TRUE
EPI_ISL_69418	A/chicken/Guangdong/B5/2002	Y280B	Y280B	TRUE
EPI_ISL_69412	A/chicken/Guangdong/HE10/2009	Y280B	Y280B	TRUE
EPI_ISL_97717	A/chicken/Anhui/M2/2011	Y280B	Y280B	TRUE
EPI_ISL_97522	A/chicken/Hubei/G6/2010	Y280B	Y280B	TRUE
EPI_ISL_69410	A/chicken/Guangdong/E24/2008	Y280B	Y280B	TRUE
EPI_ISL_69397	A/chicken/Jiangsu/E26/2007	Y280B	Y280B	TRUE
EPI_ISL_7348	A/chicken/Fujian/5683/2005	Y280B	Y280B	TRUE
EPI_ISL_99617	A/chicken/Hubei/LLM03/2011	Y280B	Y280B	TRUE
EPI_ISL_63470	A/chicken/Yunnan/Zhaotong/2007	Y280B	Y280B	TRUE
EPI_ISL_7315	A/chicken/Shantou/1926/2004	Y280B	Y280B	TRUE
EPI_ISL_77233	A/chicken/Shandong/S2/2005	Y280B	Y280B	TRUE
EPI_ISL_7486	A/silky_chicken/Shantou/2619/2001	Y280B	Y280B	TRUE
EPI_ISL_84324	A/chicken/Shandong/1/2006	Y280B	Y280B	TRUE
EPI_ISL_97644	A/chicken/Anhui/G12/2010	Y280B	Y280B	TRUE
EPI_ISL_7492	A/chicken/Shantou/5319/2001	Y280B	Y280B	TRUE
EPI_ISL_97852	A/chicken/Jiangsu/I20/2011	Y280B	Y280B	TRUE
EPI_ISL_69430	A/chicken/Guangdong/G7/2009	Y280B	Y280B	TRUE
EPI_ISL_97244	A/chicken/Shandong/N/2010	Y280B	Y280B	TRUE
EPI_ISL_97663	A/chicken/Chongqing/K23/2011	Y280B	Y280B	TRUE
EPI_ISL_4467	A/chicken/HongKong/NT366/03	Y280B	Y280B	TRUE
EPI_ISL_84333	A/chicken/Beijing/1/2006	Y280B	Y280B	TRUE
EPI_ISL_29154	A/chicken/Fujian/FG13/2007	Y280B	Y280B	TRUE
EPI_ISL_89727	A/chicken/Jiangsu/ZHM/2011	Y280B	Y280B	TRUE
EPI_ISL_97698	A/chicken/Ningxia/29/2011	Y280B	Y280B	TRUE
EPI_ISL_89723	A/chicken/Hubei/GYC/2011	Y280B	Y280B	TRUE
EPI_ISL_84322	A/chicken/Shandong/22/2008	Y280B	Y280B	TRUE
EPI_ISL_97684	A/chicken/Ningxia/189/2011	Y280B	Y280B	TRUE
EPI_ISL_7329	A/silky_chicken/Shantou/459/2005	Y280B	Y280B	TRUE
EPI_ISL_89653	A/chicken/Zhejiang/SJL/2009	Y280B	Y280B	TRUE
EPI_ISL_97715	A/chicken/Anhui/M5/2011	Y280B	Y280B	TRUE
EPI_ISL_98300	A/chicken/Guangdong/R21/2009	Y280B	Y280B	TRUE
EPI_ISL_4452	A/chicken/HongKong/AP45/03	Y280B	Y280B	TRUE
EPI_ISL_97586	A/chicken/Anhui/D21/2010	Y280B	Y280B	TRUE
EPI_ISL_74001	A/chicken/Heibei/8/2003	Y280B	Y280B	TRUE
EPI_ISL_97793	A/chicken/Shanxi/D4/2011	Y280B	Y280B	TRUE
EPI_ISL_98239	A/chicken/Guangdong/R23/2009	Y280B	Y280B	TRUE
EPI_ISL_73326	A/chicken/Jiande/01/2009	Y280B	Y280B	TRUE
EPI_ISL_84321	A/chicken/Shandong/1231/2008	Y280B	Y280B	TRUE
EPI_ISL_7489	A/chicken/Shantou/3778/2001	Y280B	Y280B	TRUE
EPI_ISL_97660	A/chicken/Chongqing/D17/2011	Y280B	Y280B	TRUE
EPI_ISL_97905	A/chicken/Henan/I27/2011	Y280B	Y280B	TRUE
EPI_ISL_89133	A/duck/Tibet/S2/2009	Y280B	Y280B	TRUE
EPI_ISL_97615	A/chicken/Henan/G19/2010	Y280B	Y280B	TRUE
EPI_ISL_98312	A/chicken/Guangdong/K23/2009	Y280B	Y280B	TRUE
EPI_ISL_7304	A/chicken/Shantou/3341/2003	Y280B	Y280B	TRUE
EPI_ISL_7336	A/chicken/Shantou/9909/2005	Y280B	Y280B	TRUE
EPI_ISL_97910	A/chicken/Henan/H5/2011	Y280B	Y280B	TRUE
EPI_ISL_11277	A/quail/Shantou/850/2001	Y280B	Y280B	TRUE
EPI_ISL_69413	A/chicken/Guangdong/HE21/2008	Y280B	Y280B	TRUE
EPI_ISL_99614	A/chicken/Fujian/HJF04/2011	Y280B	Y280B	TRUE
EPI_ISL_3045	A/Shaoguan/447/98	Y280B	Y280B	TRUE
EPI_ISL_70611	A/sparrow/Guangxi/31/2006	Y280B	Y280B	TRUE
EPI_ISL_89750	A/chicken/Anhui/XMS/2011	Y280B	Y280B	TRUE
EPI_ISL_98304	A/chicken/Guangdong/Y7/2009	Y280B	Y280B	TRUE
EPI_ISL_77200	A/chicken/Shandong/FX/2009	Y280B	Y280B	TRUE
EPI_ISL_7460	A/partridge/Shantou/645/2001	Y280B	Y280B	TRUE
EPI_ISL_83294	A/chicken/Ningxia/S17/2009	Y280B	Y280B	TRUE
EPI_ISL_8497	A/chicken/Guangdong/47/01	Y280B	Y280B	TRUE
EPI_ISL_77197	A/chicken/Shandong/PD/2009	Y280B	Y280B	TRUE
EPI_ISL_99616	A/chicken/Guizhou/XK04/2011	Y280B	Y280B	TRUE
EPI_ISL_97533	A/chicken/Hubei/E17/2010	Y280B	Y280B	TRUE
EPI_ISL_97751	A/chicken/Anhui/B24/2011	Y280B	Y280B	TRUE
EPI_ISL_69396	A/chicken/Hubei/E13/2008	Y280B	Y280B	TRUE
EPI_ISL_97767	A/chicken/Shanxi/K16/2011	Y280B	Y280B	TRUE
EPI_ISL_97511	A/chicken/Guangdong/D9/2010	Y280B	Y280B	TRUE
EPI_ISL_2244	A/quail/Shanghai/8/96	Y280B	Y280B	TRUE
EPI_ISL_97853	A/chicken/Jiangsu/I2/2011	Y280B	Y280B	TRUE
EPI_ISL_97912	A/chicken/Henan/H29/2011	Y280B	Y280B	TRUE
EPI_ISL_98219	A/chicken/Guangdong/P2/2009	Y280B	Y280B	TRUE
EPI_ISL_98224	A/chicken/Guangdong/B7/2009	Y280B	Y280B	TRUE
EPI_ISL_98305	A/chicken/Guangdong/Y4/2009	Y280B	Y280B	TRUE
EPI_ISL_7300	A/chicken/Shantou/1404/2003	Y280B	Y280B	TRUE
EPI_ISL_9790	A/Ck/HK/WF126/2003	Y280B	Y280B	TRUE
EPI_ISL_4469	A/chicken/HongKong/YU427/03	Y280B	Y280B	TRUE
EPI_ISL_24920	A/chicken/Shandong/qd04/2007	Y280B	Y280B	TRUE
EPI_ISL_97970	A/chicken/Henan/E24/2011	Y280B	Y280B	TRUE
EPI_ISL_98315	A/chicken/Guangdong/J23/2009	Y280B	Y280B	TRUE
EPI_ISL_7397	A/duck/Shantou/3460/2003	Y280B	Y280B	TRUE
EPI_ISL_89649	A/chicken/Hainan/Q4/2010	Y280B	Y280B	TRUE
EPI_ISL_84547	A/chicken/Yunnanws/102/2008	Y280B	Y280B	TRUE
EPI_ISL_97862	A/chicken/Jiangsu/D10/2011	Y280B	Y280B	TRUE
EPI_ISL_98320	A/chicken/Guangdong/K3/2009	Y280B	Y280B	TRUE
EPI_ISL_24718	A/chicken/Guangdong/1/2002	Y280B	Y280B	TRUE
EPI_ISL_7299	A/partridge/Shantou/3720/2001	Y280B	Y280B	TRUE
EPI_ISL_84538	A/chicken/Puer/411/2009	Y280B	Y280B	TRUE
EPI_ISL_77198	A/chicken/Shandong/HY/2009	Y280B	Y280B	TRUE
EPI_ISL_84323	A/chicken/Shandong/12/2008	Y280B	Y280B	TRUE
EPI_ISL_29166	A/chicken/Hunan/HB5/2007	Y280B	Y280B	TRUE
EPI_ISL_69414	A/chicken/Guangdong/HE22/2008	Y280B	Y280B	TRUE
EPI_ISL_63468	A/chicken/Yunnan/Kunming/2007	Y280B	Y280B	TRUE
EPI_ISL_10168	A/chicken/China/Guangxi1/2000	Y280B	Y280B	TRUE
EPI_ISL_97669	A/chicken/Chongqing/A56/2011	Y280B	Y280B	TRUE
EPI_ISL_7340	A/chicken/Shantou/20817/2005	Y280B	Y280B	TRUE
EPI_ISL_97861	A/chicken/Jiangsu/D8/2011	Y280B	Y280B	TRUE
EPI_ISL_8922	A/duck/Nanchang/4-361/2001	Y280B	Y280B	TRUE
EPI_ISL_7338	A/chicken/Shantou/17139/2005	Y280B	Y280B	TRUE
EPI_ISL_63469	A/chicken/Yunnan/Wenshan/2007	Y280B	Y280B	TRUE
EPI_ISL_97979	A/chicken/Henan/E1/2011	Y280B	Y280B	TRUE
EPI_ISL_4468	A/chicken/HongKong/SSP418/03	Y280B	Y280B	TRUE
EPI_ISL_7408	A/partridge/Shantou/4525/2002	Y280B	Y280B	TRUE
EPI_ISL_2297	A/duck/Shantou/2143/00	Y280B	Y280B	TRUE
EPI_ISL_89710	A/chicken/Anhui/WANG/2010	Y280B	Y280B	TRUE
EPI_ISL_97867	A/chicken/Jiangsu/B4/2011	Y280B	Y280B	TRUE
EPI_ISL_7449	A/partridge/Shantou/5692/2000	Y280B	Y280B	TRUE
EPI_ISL_7326	A/silky_chicken/Shantou/7790/2004	Y280B	Y280B	TRUE
EPI_ISL_69437	A/chicken/Zhejiang/HE1/2009	Y280B	Y280B	TRUE
EPI_ISL_62988	A/chicken/Anhui/G20/2008	Y280B	Y280B	TRUE
EPI_ISL_63462	A/chicken/Liaoning/41/17/2007	Y280B	Y280B	TRUE
EPI_ISL_24723	A/chicken/Hebei/2/2002	Y280B	Y280B	TRUE
EPI_ISL_97703	A/chicken/Guizhou/D26/2011	Y280B	Y280B	TRUE
EPI_ISL_69416	A/chicken/Guangdong/B4/2006	Y280B	Y280B	TRUE
EPI_ISL_7417	A/pheasant/Shantou/3716/2003	Y280B	Y280B	TRUE
EPI_ISL_24917	A/chicken/Guangdong/02/2007	Y280B	Y280B	TRUE
EPI_ISL_2232	A/chicken/Beijing/8/98	Y280B	Y280B	TRUE
EPI_ISL_7395	A/duck/Shantou/4103/2002	Y280B	Y280B	TRUE
EPI_ISL_7478	A/silky_chicken/Shantou/1818/2000	Y280B	Y280B	TRUE
EPI_ISL_97992	A/chicken/Hainan/J3/2011	Y280B	Y280B	TRUE
EPI_ISL_83293	A/chicken/Ningxia/R13/2009	Y280B	Y280B	TRUE
EPI_ISL_70190	A/environment/Hunan/1-81/2007	Y280B	Y280B	TRUE
EPI_ISL_29167	A/chicken/Hunan/HE5/2007	Y280B	Y280B	TRUE
EPI_ISL_11312	A/quail/Shantou/3502/2003	Y280B	Y280B	TRUE
EPI_ISL_69429	A/chicken/Guangdong/A4/2003	Y280B	Y280B	TRUE
EPI_ISL_4453	A/chicken/HongKong/BD90/03	Y280B	Y280B	TRUE
EPI_ISL_67372	A/chicken/Henan/1/2003	Y280B	Y280B	TRUE
EPI_ISL_89651	A/chicken/Zhejiang/Q1D4/2010	Y280B	Y280B	TRUE

## Sheet: full HA2
Accession	Strain	Annotation	Prediction	Correct
EPI_ISL_68496	A/chicken/Iran/705/1999	G1_Mideast_D	G1_Mideast_B	FALSE
EPI_ISL_128	A/parakeet/Narita/92A/98	G1_Mideast_D	G1_Asia	FALSE
EPI_ISL_3446	A/chicken/Beijing/1/00	Y280_G9	Chk_Bei	FALSE
EPI_ISL_2439	A/chicken/Beijing/1/95	Y280_G9	Chk_Bei	FALSE
EPI_ISL_2441	A/chicken/Beijing/3/99	Y280_G9	Chk_Bei	FALSE
EPI_ISL_24717	A/chicken/Fujian/2/2002	Y280_G9	Chk_Bei	FALSE
EPI_ISL_8498	A/chicken/Guangdong/5/97	Y280_G9	Chk_Bei	FALSE
EPI_ISL_68684	A/chicken/Guangdong/97_	Y280_G9	Chk_Bei	FALSE
EPI_ISL_68726	A/chicken/Guangdong/SS/94	Y280_G9	Chk_Bei	FALSE
EPI_ISL_24726	A/chicken/Jiangsu/nj13/2001	Y280_G9	Chk_Bei	FALSE
EPI_ISL_3692	A/chicken/Mudanjiang/0823/2000	Y280_G9	Chk_Bei	FALSE
EPI_ISL_2166	A/chicken/Tianjing/1/96	Y280_G9	Y280B	FALSE
EPI_ISL_2243	A/duck/Nanjing/1/97	Y280_G9	Chk_Bei	FALSE
EPI_ISL_8511	A/duck/Nanjing/2/97	Y280_G9	Chk_Bei	FALSE
EPI_ISL_2170	A/chicken/Beijing/1/97	Y280B	Y280_G9	FALSE
EPI_ISL_2232	A/chicken/Beijing/8/98	Y280B	Y280_G9	FALSE
EPI_ISL_24723	A/chicken/Hebei/2/2002	Y280B	Y280_G9	FALSE
EPI_ISL_2445	A/chicken/Hebei/3/98	Y280B	Y280_G9	FALSE
EPI_ISL_24710	A/chicken/Henan/5/2001	Y280B	Y280_G9	FALSE
EPI_ISL_69859	A/chicken/Hubei	Y280B	Y280_G9	FALSE
EPI_ISL_68503	A/chicken/Liaoning/99	Y280B	Y280_G9	FALSE
EPI_ISL_8512	A/chicken/Ningxia/4/99	Y280B	Y280_G9	FALSE
EPI_ISL_2162	A/chicken/Shandong/2/99	Y280B	Y280_G9	FALSE
EPI_ISL_7342	A/chicken/Shantou/22504/2005	Y280B	Y280_Fuj_SL6	FALSE
EPI_ISL_64342	A/chicken/Yunnan/Diqing/2006	Y280B	Y280_Fuj_SL6	FALSE
EPI_ISL_69873	A/duck/China	Y280B	Y280_G9	FALSE
EPI_ISL_10144	A/duck/Hubei/W1/2004	Y280B	Y280_G9	FALSE
EPI_ISL_7398	A/Guinea_fowl/Shantou/1677/2000	Y280B	Y280_G9	FALSE
EPI_ISL_7377	A/chicken/Hunan/4246/2005	Chk_Bei	Chk_Bei	TRUE
EPI_ISL_7324	A/chicken/Shantou/6786/2004	Chk_Bei	Chk_Bei	TRUE
EPI_ISL_7412	A/chukkar/Shantou/1039/2003	Chk_Bei	Chk_Bei	TRUE
EPI_ISL_7399	A/chukkar/Shantou/1059/2002	Chk_Bei	Chk_Bei	TRUE
EPI_ISL_7418	A/chukkar/Shantou/3980/2003	Chk_Bei	Chk_Bei	TRUE
EPI_ISL_7365	A/chukkar/Shantou/465/2002	Chk_Bei	Chk_Bei	TRUE
EPI_ISL_2303	A/duck/Shantou/2134/00	Chk_Bei	Chk_Bei	TRUE
EPI_ISL_9788	A/Gf/HK/SSP607/2003	Chk_Bei	Chk_Bei	TRUE
EPI_ISL_7463	A/Guinea_fowl/Shantou/630/2005	Chk_Bei	Chk_Bei	TRUE
EPI_ISL_4465	A/guineafowl/HongKong/NT184/03	Chk_Bei	Chk_Bei	TRUE
EPI_ISL_9786	A/HK/2108/2003	Chk_Bei	Chk_Bei	TRUE
EPI_ISL_7416	A/partridge/Shantou/1800/2000	Chk_Bei	Chk_Bei	TRUE
EPI_ISL_7469	A/partridge/Shantou/22102/2005	Chk_Bei	Chk_Bei	TRUE
EPI_ISL_7430	A/partridge/Shantou/25/2004	Chk_Bei	Chk_Bei	TRUE
EPI_ISL_7354	A/partridge/Shantou/354/2002	Chk_Bei	Chk_Bei	TRUE
EPI_ISL_7420	A/partridge/Shantou/4093/2003	Chk_Bei	Chk_Bei	TRUE
EPI_ISL_7310	A/partridge/Shantou/4541/2001	Chk_Bei	Chk_Bei	TRUE
EPI_ISL_7321	A/partridge/Shantou/4829/2001	Chk_Bei	Chk_Bei	TRUE
EPI_ISL_7429	A/partridge/Shantou/4889/2003	Chk_Bei	Chk_Bei	TRUE
EPI_ISL_7434	A/partridge/Shantou/688/2004	Chk_Bei	Chk_Bei	TRUE
EPI_ISL_7457	A/partridge/Shantou/7343/2004	Chk_Bei	Chk_Bei	TRUE
EPI_ISL_7415	A/pheasant/Shantou/3530/2003	Chk_Bei	Chk_Bei	TRUE
EPI_ISL_7409	A/pheasant/Shantou/443/2003	Chk_Bei	Chk_Bei	TRUE
EPI_ISL_7428	A/pheasant/Shantou/4709/2003	Chk_Bei	Chk_Bei	TRUE
EPI_ISL_7410	A/pheasant/Shantou/511/2003	Chk_Bei	Chk_Bei	TRUE
EPI_ISL_7458	A/pheasant/Shantou/7501/2004	Chk_Bei	Chk_Bei	TRUE
EPI_ISL_7459	A/pheasant/Shantou/7814/2004	Chk_Bei	Chk_Bei	TRUE
EPI_ISL_7435	A/pheasant/Shantou/841/2004	Chk_Bei	Chk_Bei	TRUE
EPI_ISL_11297	A/quail/Shantou/1038/2002	Chk_Bei	Chk_Bei	TRUE
EPI_ISL_11305	A/quail/Shantou/1140/2003	Chk_Bei	Chk_Bei	TRUE
EPI_ISL_11272	A/quail/Shantou/1318/2000	Chk_Bei	Chk_Bei	TRUE
EPI_ISL_11282	A/quail/Shantou/1461/2001	Chk_Bei	Chk_Bei	TRUE
EPI_ISL_11338	A/quail/Shantou/15892/2005	Chk_Bei	Chk_Bei	TRUE
EPI_ISL_11306	A/quail/Shantou/1780/2003	Chk_Bei	Chk_Bei	TRUE
EPI_ISL_11307	A/quail/Shantou/1978/2003	Chk_Bei	Chk_Bei	TRUE
EPI_ISL_11340	A/quail/Shantou/20787/2005	Chk_Bei	Chk_Bei	TRUE
EPI_ISL_11269	A/quail/Shantou/243/2000	Chk_Bei	Chk_Bei	TRUE
EPI_ISL_11308	A/quail/Shantou/2608/2003	Chk_Bei	Chk_Bei	TRUE
EPI_ISL_11313	A/quail/Shantou/3700/2003	Chk_Bei	Chk_Bei	TRUE
EPI_ISL_11287	A/quail/Shantou/4179/2001	Chk_Bei	Chk_Bei	TRUE
EPI_ISL_11289	A/quail/Shantou/4762/2001	Chk_Bei	Chk_Bei	TRUE
EPI_ISL_11319	A/quail/Shantou/5/2004	Chk_Bei	Chk_Bei	TRUE
EPI_ISL_7311	A/silky_chicken/Shantou/473/2004	Chk_Bei	Chk_Bei	TRUE
EPI_ISL_7470	A/chukkar/Shantou/22116/2005	G1_Asia	G1_Asia	TRUE
EPI_ISL_66541	A/ferret/Maryland/P10-UMD/2008	G1_Asia	G1_Asia	TRUE
EPI_ISL_3215	A/guinea_fowl/Hong_Kong/WF10/99	G1_Asia	G1_Asia	TRUE
EPI_ISL_7471	A/Guinea_fowl/Shantou/2076/2001	G1_Asia	G1_Asia	TRUE
EPI_ISL_69733	A/Hong_Kong/33982/2009	G1_Asia	G1_Asia	TRUE
EPI_ISL_7288	A/partridge/Shantou/2875/2001	G1_Asia	G1_Asia	TRUE
EPI_ISL_11336	A/quail/Shantou/11195/2005	G1_Asia	G1_Asia	TRUE
EPI_ISL_11280	A/quail/Shantou/1242/2001	G1_Asia	G1_Asia	TRUE
EPI_ISL_11271	A/quail/Shantou/1310/2000	G1_Asia	G1_Asia	TRUE
EPI_ISL_11337	A/quail/Shantou/13425/2005	G1_Asia	G1_Asia	TRUE
EPI_ISL_11298	A/quail/Shantou/1551/2002	G1_Asia	G1_Asia	TRUE
EPI_ISL_11283	A/quail/Shantou/1555/2001	G1_Asia	G1_Asia	TRUE
EPI_ISL_11339	A/quail/Shantou/19506/2005	G1_Asia	G1_Asia	TRUE
EPI_ISL_11341	A/quail/Shantou/21605/2005	G1_Asia	G1_Asia	TRUE
EPI_ISL_11275	A/quail/Shantou/2816/2000	G1_Asia	G1_Asia	TRUE
EPI_ISL_11303	A/quail/Shantou/308/2003	G1_Asia	G1_Asia	TRUE
EPI_ISL_11314	A/quail/Shantou/3768/2003	G1_Asia	G1_Asia	TRUE
EPI_ISL_11299	A/quail/Shantou/3851/2002	G1_Asia	G1_Asia	TRUE
EPI_ISL_11317	A/quail/Shantou/4044/2003	G1_Asia	G1_Asia	TRUE
EPI_ISL_11288	A/quail/Shantou/4641/2001	G1_Asia	G1_Asia	TRUE
EPI_ISL_11318	A/quail/Shantou/4850/2003	G1_Asia	G1_Asia	TRUE
EPI_ISL_63454	A/chicken/Israel/114/2007	G1_Mideast_A	G1_Mideast_A	TRUE
EPI_ISL_19621	A/chicken/Israel/178/2006	G1_Mideast_A	G1_Mideast_A	TRUE
EPI_ISL_10376	A/chicken/Israel/1953/2004	G1_Mideast_A	G1_Mideast_A	TRUE
EPI_ISL_19622	A/chicken/Israel/282/2005	G1_Mideast_A	G1_Mideast_A	TRUE
EPI_ISL_30443	A/chicken/Israel/375/2007	G1_Mideast_A	G1_Mideast_A	TRUE
EPI_ISL_19627	A/chicken/Israel/853/2005	G1_Mideast_A	G1_Mideast_A	TRUE
EPI_ISL_85779	A/chicken/Jordan/09vir579-2/2007	G1_Mideast_A	G1_Mideast_A	TRUE
EPI_ISL_85772	A/chicken/Jordan/1436-1451/2004	G1_Mideast_A	G1_Mideast_A	TRUE
EPI_ISL_85774	A/chicken/Jordan/1436-643/2004	G1_Mideast_A	G1_Mideast_A	TRUE
EPI_ISL_4535	A/ostrich/Eshkol/1436/03	G1_Mideast_A	G1_Mideast_A	TRUE
EPI_ISL_10375	A/turkey/Israel/1209/2003	G1_Mideast_A	G1_Mideast_A	TRUE
EPI_ISL_19623	A/turkey/Israel/425/2005	G1_Mideast_A	G1_Mideast_A	TRUE
EPI_ISL_10373	A/turkey/Israel/810/2001	G1_Mideast_A	G1_Mideast_A	TRUE
EPI_ISL_19628	A/turkey/Israel/884/2005	G1_Mideast_A	G1_Mideast_A	TRUE
EPI_ISL_9481	A/turkey/Shadmot_Dvorah/1567/04	G1_Mideast_A	G1_Mideast_A	TRUE
EPI_ISL_62976	A/avian/Israel/313/2008	G1_Mideast_B	G1_Mideast_B	TRUE
EPI_ISL_80921	A/avian/Saudi_Arabia/910134/2006	G1_Mideast_B	G1_Mideast_B	TRUE
EPI_ISL_63782	A/chicken/Afghanistan/329-3vir09-AFG-Khost2/2008	G1_Mideast_B	G1_Mideast_B	TRUE
EPI_ISL_63784	A/chicken/Afghanistan/329-5vir09-AFG-Khost4/2008	G1_Mideast_B	G1_Mideast_B	TRUE
EPI_ISL_63787	A/chicken/Afghanistan/329-8vir09-AFG-Heart7/2009	G1_Mideast_B	G1_Mideast_B	TRUE
EPI_ISL_78703	A/chicken/Chandigarh/2048/2003	G1_Mideast_B	G1_Mideast_B	TRUE
EPI_ISL_85790	A/chicken/Dubai/09vir3771-3/2008	G1_Mideast_B	G1_Mideast_B	TRUE
EPI_ISL_78704	A/chicken/Gujarat/3697/2004	G1_Mideast_B	G1_Mideast_B	TRUE
EPI_ISL_27600	A/chicken/Haryana/2051/2003	G1_Mideast_B	G1_Mideast_B	TRUE
EPI_ISL_97221	A/chicken/India/IVRI-0004/2010	G1_Mideast_B	G1_Mideast_B	TRUE
EPI_ISL_97215	A/chicken/India/IVRI-0011/2011	G1_Mideast_B	G1_Mideast_B	TRUE
EPI_ISL_85792	A/chicken/Iran/10VIR854-3/2009	G1_Mideast_B	G1_Mideast_B	TRUE
EPI_ISL_85794	A/chicken/Iran/10VIR854-4/2009	G1_Mideast_B	G1_Mideast_B	TRUE
EPI_ISL_85791	A/chicken/Iran/10VIR854-5/2008	G1_Mideast_B	G1_Mideast_B	TRUE
EPI_ISL_65650	A/chicken/Iran/133/2004	G1_Mideast_B	G1_Mideast_B	TRUE
EPI_ISL_67377	A/chicken/Iran/320/2003	G1_Mideast_B	G1_Mideast_B	TRUE
EPI_ISL_64312	A/chicken/Iran/68/2006	G1_Mideast_B	G1_Mideast_B	TRUE
EPI_ISL_11180	A/chicken/Iran/B308B/2004	G1_Mideast_B	G1_Mideast_B	TRUE
EPI_ISL_97042	A/chicken/Iran/EBGV-88/2010	G1_Mideast_B	G1_Mideast_B	TRUE
EPI_ISL_63003	A/chicken/Iran/RZ28/2008	G1_Mideast_B	G1_Mideast_B	TRUE
EPI_ISL_63007	A/chicken/Iran/RZ53/2008	G1_Mideast_B	G1_Mideast_B	TRUE
EPI_ISL_63444	A/chicken/Iran/SH2/2007	G1_Mideast_B	G1_Mideast_B	TRUE
EPI_ISL_15732	A/chicken/Iran/TH186/2007	G1_Mideast_B	G1_Mideast_B	TRUE
EPI_ISL_15730	A/chicken/Iran/TH286/2007	G1_Mideast_B	G1_Mideast_B	TRUE
EPI_ISL_15729	A/chicken/Iran/TH85/2007	G1_Mideast_B	G1_Mideast_B	TRUE
EPI_ISL_63445	A/chicken/Iran/THLBM861/2007	G1_Mideast_B	G1_Mideast_B	TRUE
EPI_ISL_63446	A/chicken/Iran/THLBM862/2007	G1_Mideast_B	G1_Mideast_B	TRUE
EPI_ISL_63447	A/chicken/Iran/THLBM863/2007	G1_Mideast_B	G1_Mideast_B	TRUE
EPI_ISL_63450	A/chicken/Iran/THLBM866/2007	G1_Mideast_B	G1_Mideast_B	TRUE
EPI_ISL_63452	A/chicken/Iran/THLBM868/2007	G1_Mideast_B	G1_Mideast_B	TRUE
EPI_ISL_63453	A/chicken/Israel/1033/2007	G1_Mideast_B	G1_Mideast_B	TRUE
EPI_ISL_30437	A/chicken/Israel/1040/2007	G1_Mideast_B	G1_Mideast_B	TRUE
EPI_ISL_30439	A/chicken/Israel/182/2008	G1_Mideast_B	G1_Mideast_B	TRUE
EPI_ISL_30440	A/chicken/Israel/184/2009	G1_Mideast_B	G1_Mideast_B	TRUE
EPI_ISL_63455	A/chicken/Israel/215/2007	G1_Mideast_B	G1_Mideast_B	TRUE
EPI_ISL_63009	A/chicken/Israel/524/2008	G1_Mideast_B	G1_Mideast_B	TRUE
EPI_ISL_30445	A/chicken/Israel/694/2008	G1_Mideast_B	G1_Mideast_B	TRUE
EPI_ISL_30446	A/chicken/Israel/702/2008	G1_Mideast_B	G1_Mideast_B	TRUE
EPI_ISL_63459	A/chicken/Israel/728/2007	G1_Mideast_B	G1_Mideast_B	TRUE
EPI_ISL_30447	A/chicken/Israel/869/2007	G1_Mideast_B	G1_Mideast_B	TRUE
EPI_ISL_30448	A/chicken/Israel/883/2008	G1_Mideast_B	G1_Mideast_B	TRUE
EPI_ISL_63460	A/chicken/Israel/933/2007	G1_Mideast_B	G1_Mideast_B	TRUE
EPI_ISL_30449	A/chicken/Israel/951/2007	G1_Mideast_B	G1_Mideast_B	TRUE
EPI_ISL_85776	A/chicken/Jordan/436-1/2010	G1_Mideast_B	G1_Mideast_B	TRUE
EPI_ISL_85777	A/chicken/Jordan/436-2/2010	G1_Mideast_B	G1_Mideast_B	TRUE
EPI_ISL_85796	A/chicken/Kurdistan/4693-9/2009	G1_Mideast_B	G1_Mideast_B	TRUE
EPI_ISL_29787	A/chicken/Pakistan/UDL-01/2005	G1_Mideast_B	G1_Mideast_B	TRUE
EPI_ISL_29789	A/chicken/Pakistan/UDL-01/2006	G1_Mideast_B	G1_Mideast_B	TRUE
EPI_ISL_29793	A/chicken/Pakistan/UDL-01/2008	G1_Mideast_B	G1_Mideast_B	TRUE
EPI_ISL_29788	A/chicken/Pakistan/UDL-02/2005	G1_Mideast_B	G1_Mideast_B	TRUE
EPI_ISL_29790	A/chicken/Pakistan/UDL-02/2006	G1_Mideast_B	G1_Mideast_B	TRUE
EPI_ISL_29794	A/chicken/Pakistan/UDL-02/2008	G1_Mideast_B	G1_Mideast_B	TRUE
EPI_ISL_29786	A/chicken/Pakistan/UDL-04/2006	G1_Mideast_B	G1_Mideast_B	TRUE
EPI_ISL_29796	A/chicken/Pakistan/UDL-04/2007	G1_Mideast_B	G1_Mideast_B	TRUE
EPI_ISL_27601	A/chicken/Punjab/2063/2003	G1_Mideast_B	G1_Mideast_B	TRUE
EPI_ISL_85798	A/chicken/Qatar/4576-4/2008	G1_Mideast_B	G1_Mideast_B	TRUE
EPI_ISL_85781	A/chicken/Saudi_Arabia/08vir3489-38-as92/2005	G1_Mideast_B	G1_Mideast_B	TRUE
EPI_ISL_85782	A/chicken/Saudi_Arabia/08vir3489-44-as253/2006	G1_Mideast_B	G1_Mideast_B	TRUE
EPI_ISL_85786	A/chicken/Saudi_Arabia/08vir3489-47-as215/2007	G1_Mideast_B	G1_Mideast_B	TRUE
EPI_ISL_85785	A/chicken/Saudi_Arabia/08vir3489-48-as997/2007	G1_Mideast_B	G1_Mideast_B	TRUE
EPI_ISL_85788	A/chicken/Saudi_Arabia/08vir3489-50-as118/2008	G1_Mideast_B	G1_Mideast_B	TRUE
EPI_ISL_85787	A/chicken/Saudi_Arabia/08vir3489-51-as366/2008	G1_Mideast_B	G1_Mideast_B	TRUE
EPI_ISL_83300	A/chicken/Tripura/105131/2008	G1_Mideast_B	G1_Mideast_B	TRUE
EPI_ISL_76224	A/chicken/Uchal/8293/2006	G1_Mideast_B	G1_Mideast_B	TRUE
EPI_ISL_85784	A/falcon/Saudi_Arabia/08vir3489-40-as977/2006	G1_Mideast_B	G1_Mideast_B	TRUE
EPI_ISL_93285	A/quail/Lebanon/272/2010	G1_Mideast_B	G1_Mideast_B	TRUE
EPI_ISL_93286	A/quail/Lebanon/273/2010	G1_Mideast_B	G1_Mideast_B	TRUE
EPI_ISL_64478	A/turkey/Israel/1608/2006	G1_Mideast_B	G1_Mideast_B	TRUE
EPI_ISL_30444	A/turkey/Israel/689/2008	G1_Mideast_B	G1_Mideast_B	TRUE
EPI_ISL_69121	A/watercoot/Haryana/5844/2005	G1_Mideast_B	G1_Mideast_B	TRUE
EPI_ISL_85793	A/chicken/Iran/10VIR854-1/2002	G1_Mideast_D	G1_Mideast_D	TRUE
EPI_ISL_64828	A/chicken/Iran/119/2005	G1_Mideast_D	G1_Mideast_D	TRUE
EPI_ISL_65651	A/chicken/Iran/152/2004	G1_Mideast_D	G1_Mideast_D	TRUE
EPI_ISL_68019	A/chicken/Iran/233/2001	G1_Mideast_D	G1_Mideast_D	TRUE
EPI_ISL_68364	A/chicken/Iran/584/2000	G1_Mideast_D	G1_Mideast_D	TRUE
EPI_ISL_68591	A/chicken/Iran/661/1998	G1_Mideast_D	G1_Mideast_D	TRUE
EPI_ISL_64829	A/chicken/Iran/86/2005	G1_Mideast_D	G1_Mideast_D	TRUE
EPI_ISL_11179	A/chicken/Iran/B308A/2004	G1_Mideast_D	G1_Mideast_D	TRUE
EPI_ISL_11178	A/chicken/Iran/B314/2003	G1_Mideast_D	G1_Mideast_D	TRUE
EPI_ISL_15736	A/chicken/Iran/TH80/2000	G1_Mideast_D	G1_Mideast_D	TRUE
EPI_ISL_10141	A/chicken/Cheongju/ADL0401/2004	KR38349	KR38349	TRUE
EPI_ISL_13845	A/chicken/Korea/01310/2001	KR38349	KR38349	TRUE
EPI_ISL_77209	A/chicken/Korea/A170/2009	KR38349	KR38349	TRUE
EPI_ISL_70424	A/chicken/Korea/ADL050895/2005	KR38349	KR38349	TRUE
EPI_ISL_70426	A/chicken/Korea/ADL060162/2006	KR38349	KR38349	TRUE
EPI_ISL_70427	A/chicken/Korea/ADL060168/2006	KR38349	KR38349	TRUE
EPI_ISL_70428	A/chicken/Korea/ADL060196/2006	KR38349	KR38349	TRUE
EPI_ISL_70429	A/chicken/Korea/ADL060580/2006	KR38349	KR38349	TRUE
EPI_ISL_70439	A/chicken/Korea/ADL060831/2006	KR38349	KR38349	TRUE
EPI_ISL_70430	A/chicken/Korea/ADL060845/2006	KR38349	KR38349	TRUE
EPI_ISL_70431	A/chicken/Korea/ADL060865/2006	KR38349	KR38349	TRUE
EPI_ISL_70432	A/chicken/Korea/ADL062128/2006	KR38349	KR38349	TRUE
EPI_ISL_70438	A/chicken/Korea/ADL070121/2007	KR38349	KR38349	TRUE
EPI_ISL_70436	A/chicken/Korea/ADL070801/2007	KR38349	KR38349	TRUE
EPI_ISL_68688	A/chicken/Korea/AI-96004/1996	KR38349	KR38349	TRUE
EPI_ISL_84582	A/chicken/Korea/HC09/2009	KR38349	KR38349	TRUE
EPI_ISL_4618	A/chicken/Korea/S1/2003	KR38349	KR38349	TRUE
EPI_ISL_9886	A/chicken/Korea/S21/04	KR38349	KR38349	TRUE
EPI_ISL_4668	A/chicken/Korea/S4/03	KR38349	KR38349	TRUE
EPI_ISL_84581	A/chicken/Korea/SH0802/2008	KR38349	KR38349	TRUE
EPI_ISL_84583	A/chicken/Korea/SH0902/2009	KR38349	KR38349	TRUE
EPI_ISL_84587	A/chicken/Korea/SH0906/2009	KR38349	KR38349	TRUE
EPI_ISL_77207	A/duck/Korea/A174/2009	KR38349	KR38349	TRUE
EPI_ISL_84585	A/duck/Korea/SH0904/2009	KR38349	KR38349	TRUE
EPI_ISL_12597	A/Korea/KBNP-0028/2000	KR38349	KR38349	TRUE
EPI_ISL_4617	A/swine/Korea/S452/2004	KR38349	KR38349	TRUE
EPI_ISL_5800	A/laughing_gull/Delaware/2718/1987	MN5733	MN5733	TRUE
EPI_ISL_4067	A/mallard/Alberta/11/91	MN5733	MN5733	TRUE
EPI_ISL_4047	A/mallard/Alberta/743/83	MN5733	MN5733	TRUE
EPI_ISL_8883	A/mallard_duck/ALB/321/1988	MN5733	MN5733	TRUE
EPI_ISL_85214	A/northern_shoveler/Interior_Alaska/8BM3470/2008	MN5733	MN5733	TRUE
EPI_ISL_99499	A/ruddy_turnstone/Delaware_Bay/2774/1987	MN5733	MN5733	TRUE
EPI_ISL_99486	A/ruddy_turnstone/Virginia/2297/1988	MN5733	MN5733	TRUE
EPI_ISL_23347	A/turkey/TX/4-1-81/1981	MN5733	MN5733	TRUE
EPI_ISL_30815	A/laughing_gull/Delaware/12/2006	SB261	SB261	TRUE
EPI_ISL_99339	A/laughing_gull/Delaware_Bay/5/2003	SB261	SB261	TRUE
EPI_ISL_84624	A/shorebird/Delaware/554/2007	SB261	SB261	TRUE
EPI_ISL_94965	A/black_swan/Morpeth/194/2008	VN340	VN340	TRUE
EPI_ISL_247	A/duck/Hokkaido/13/00	VN340	VN340	TRUE
EPI_ISL_28844	A/duck/Hokkaido/238/2008	VN340	VN340	TRUE
EPI_ISL_245	A/duck/Hokkaido/9/99	VN340	VN340	TRUE
EPI_ISL_11897	A/duck/Viet_Nam/340/2001	VN340	VN340	TRUE
EPI_ISL_11896	A/duck/Viet_Nam/68/2001	VN340	VN340	TRUE
EPI_ISL_94952	A/eastern_curlew/Stockton/4204/2008	VN340	VN340	TRUE
EPI_ISL_33856	A/gadwall/Netherlands/1/2006	VN340	VN340	TRUE
EPI_ISL_63525	A/mallard/Austria/WV1090234/2007	VN340	VN340	TRUE
EPI_ISL_98893	A/mallard/France/090360/2009	VN340	VN340	TRUE
EPI_ISL_86201	A/mallard/Iran/T366/2007	VN340	VN340	TRUE
EPI_ISL_86202	A/mallard/Iran/T370/2007	VN340	VN340	TRUE
EPI_ISL_77452	A/mallard/PT/27972-B139/2007	VN340	VN340	TRUE
EPI_ISL_63562	A/mallard/Switzerland/WV1070805/2007	VN340	VN340	TRUE
EPI_ISL_63563	A/mallard/Switzerland/WV3080008/2007	VN340	VN340	TRUE
EPI_ISL_97757	A/chicken/Anhui/A21-2/2011	Y280_Fuj_SL6	Y280_Fuj_SL6	TRUE
EPI_ISL_97658	A/chicken/Guangdong/265/2011	Y280_Fuj_SL6	Y280_Fuj_SL6	TRUE
EPI_ISL_97659	A/chicken/Guangdong/283/2011	Y280_Fuj_SL6	Y280_Fuj_SL6	TRUE
EPI_ISL_99612	A/chicken/Guangdong/FJC07/2011	Y280_Fuj_SL6	Y280_Fuj_SL6	TRUE
EPI_ISL_89745	A/chicken/Guangdong/FLS/2011	Y280_Fuj_SL6	Y280_Fuj_SL6	TRUE
EPI_ISL_89721	A/chicken/Guangdong/FZH/2011	Y280_Fuj_SL6	Y280_Fuj_SL6	TRUE
EPI_ISL_99607	A/chicken/Guangdong/HMZ11/2011	Y280_Fuj_SL6	Y280_Fuj_SL6	TRUE
EPI_ISL_89744	A/chicken/Guangdong/HYF/2011	Y280_Fuj_SL6	Y280_Fuj_SL6	TRUE
EPI_ISL_89718	A/chicken/Guangdong/LHY/2011	Y280_Fuj_SL6	Y280_Fuj_SL6	TRUE
EPI_ISL_89739	A/chicken/Guangdong/LJD/2011	Y280_Fuj_SL6	Y280_Fuj_SL6	TRUE
EPI_ISL_89743	A/chicken/Guangdong/LJH/2011	Y280_Fuj_SL6	Y280_Fuj_SL6	TRUE
EPI_ISL_89724	A/chicken/Guangdong/LMQ/2011	Y280_Fuj_SL6	Y280_Fuj_SL6	TRUE
EPI_ISL_89717	A/chicken/Guangdong/LSD/2011	Y280_Fuj_SL6	Y280_Fuj_SL6	TRUE
EPI_ISL_89732	A/chicken/Guangdong/MYS/2011	Y280_Fuj_SL6	Y280_Fuj_SL6	TRUE
EPI_ISL_89719	A/chicken/Guangdong/QZL/2011	Y280_Fuj_SL6	Y280_Fuj_SL6	TRUE
EPI_ISL_99608	A/chicken/Guangdong/SQL11/2011	Y280_Fuj_SL6	Y280_Fuj_SL6	TRUE
EPI_ISL_89706	A/chicken/Guangdong/U4/2010	Y280_Fuj_SL6	Y280_Fuj_SL6	TRUE
EPI_ISL_89720	A/chicken/Guangdong/WGH/2011	Y280_Fuj_SL6	Y280_Fuj_SL6	TRUE
EPI_ISL_89731	A/chicken/Guangdong/YJX/2011	Y280_Fuj_SL6	Y280_Fuj_SL6	TRUE
EPI_ISL_98866	A/chicken/Guangdong/ZCY/2011	Y280_Fuj_SL6	Y280_Fuj_SL6	TRUE
EPI_ISL_98865	A/chicken/Guangdong/ZHJ/2011	Y280_Fuj_SL6	Y280_Fuj_SL6	TRUE
EPI_ISL_89728	A/chicken/Guangdong/ZPY/2011	Y280_Fuj_SL6	Y280_Fuj_SL6	TRUE
EPI_ISL_99609	A/chicken/Guangxi/QCR10/2011	Y280_Fuj_SL6	Y280_Fuj_SL6	TRUE
EPI_ISL_98012	A/chicken/Guizhou/E11/2011	Y280_Fuj_SL6	Y280_Fuj_SL6	TRUE
EPI_ISL_98010	A/chicken/Guizhou/G17/2011	Y280_Fuj_SL6	Y280_Fuj_SL6	TRUE
EPI_ISL_99611	A/chicken/Guizhou/LCY09/2011	Y280_Fuj_SL6	Y280_Fuj_SL6	TRUE
EPI_ISL_97998	A/chicken/Hainan/I7/2011	Y280_Fuj_SL6	Y280_Fuj_SL6	TRUE
EPI_ISL_97688	A/chicken/Ningxia/181/2011	Y280_Fuj_SL6	Y280_Fuj_SL6	TRUE
EPI_ISL_13015	A/bird/Guangxi/63/2005	Y280_G9	Y280_G9	TRUE
EPI_ISL_13017	A/bird/Guangxi/83/2005	Y280_G9	Y280_G9	TRUE
EPI_ISL_13021	A/bird/Guangxi/H1/2006	Y280_G9	Y280_G9	TRUE
EPI_ISL_68588	A/chicken/Anhui/1/1998	Y280_G9	Y280_G9	TRUE
EPI_ISL_2153	A/chicken/Anhui/1/98	Y280_G9	Y280_G9	TRUE
EPI_ISL_67715	A/chicken/Anhui/2/2002	Y280_G9	Y280_G9	TRUE
EPI_ISL_84317	A/chicken/Anhui/2h/2002	Y280_G9	Y280_G9	TRUE
EPI_ISL_67717	A/chicken/Beijing/nl/2002	Y280_G9	Y280_G9	TRUE
EPI_ISL_8494	A/chicken/Fujian/25/00	Y280_G9	Y280_G9	TRUE
EPI_ISL_24720	A/chicken/Guangdong/10/2001	Y280_G9	Y280_G9	TRUE
EPI_ISL_24721	A/chicken/Guangdong/16/1999	Y280_G9	Y280_G9	TRUE
EPI_ISL_74003	A/chicken/Guangdong/16/2003	Y280_G9	Y280_G9	TRUE
EPI_ISL_8500	A/chicken/Guangdong/6/97	Y280_G9	Y280_G9	TRUE
EPI_ISL_8501	A/chicken/Guangxi/10/99	Y280_G9	Y280_G9	TRUE
EPI_ISL_70608	A/chicken/Guangxi/101/2006	Y280_G9	Y280_G9	TRUE
EPI_ISL_70604	A/chicken/Guangxi/17/2007	Y280_G9	Y280_G9	TRUE
EPI_ISL_7366	A/chicken/Guangxi/187/2005	Y280_G9	Y280_G9	TRUE
EPI_ISL_7370	A/chicken/Guangxi/2389/2005	Y280_G9	Y280_G9	TRUE
EPI_ISL_13010	A/chicken/Guangxi/37/2005	Y280_G9	Y280_G9	TRUE
EPI_ISL_70606	A/chicken/Guangxi/39/2007	Y280_G9	Y280_G9	TRUE
EPI_ISL_78799	A/chicken/Guangxi/KMIII/1999	Y280_G9	Y280_G9	TRUE
EPI_ISL_2157	A/chicken/Hebei/1/00	Y280_G9	Y280_G9	TRUE
EPI_ISL_24724	A/chicken/Hebei/sjz2/2001	Y280_G9	Y280_G9	TRUE
EPI_ISL_2236	A/chicken/Heilongjiang/10/97	Y280_G9	Y280_G9	TRUE
EPI_ISL_24918	A/chicken/Henan/01/2007	Y280_G9	Y280_G9	TRUE
EPI_ISL_65629	A/chicken/Henan/1/2004	Y280_G9	Y280_G9	TRUE
EPI_ISL_64827	A/chicken/Henan/1/2005	Y280_G9	Y280_G9	TRUE
EPI_ISL_65630	A/chicken/Henan/2/2004	Y280_G9	Y280_G9	TRUE
EPI_ISL_2158	A/chicken/Henan/2/98	Y280_G9	Y280_G9	TRUE
EPI_ISL_93809	A/chicken/Henan/N12/2009	Y280_G9	Y280_G9	TRUE
EPI_ISL_93811	A/chicken/Henan/N3/2002	Y280_G9	Y280_G9	TRUE
EPI_ISL_68018	A/chicken/Henan/ni/2001	Y280_G9	Y280_G9	TRUE
EPI_ISL_14003	A/chicken/Hubei/C1/2007	Y280_G9	Y280_G9	TRUE
EPI_ISL_67726	A/chicken/Hunan/774/2002	Y280_G9	Y280_G9	TRUE
EPI_ISL_90381	A/chicken/Jiangsu/01/2003	Y280_G9	Y280_G9	TRUE
EPI_ISL_68502	A/chicken/Jiangsu/1/1999	Y280_G9	Y280_G9	TRUE
EPI_ISL_67729	A/chicken/Jiangsu/1/2002	Y280_G9	Y280_G9	TRUE
EPI_ISL_65631	A/chicken/Jiangsu/1/2004	Y280_G9	Y280_G9	TRUE
EPI_ISL_2151	A/chicken/Jiangsu/1/99	Y280_G9	Y280_G9	TRUE
EPI_ISL_68025	A/chicken/Jiangsu/2/2001	Y280_G9	Y280_G9	TRUE
EPI_ISL_2152	A/chicken/Jiangsu/2/98	Y280_G9	Y280_G9	TRUE
EPI_ISL_29822	A/chicken/Jiangsu/7/2002	Y280_G9	Y280_G9	TRUE
EPI_ISL_93810	A/chicken/Jiangsu/A11/2007	Y280_G9	Y280_G9	TRUE
EPI_ISL_3588	A/chicken/Jiangsu/JS-1/2002	Y280_G9	Y280_G9	TRUE
EPI_ISL_68026	A/chicken/Jiangsu/ng/2001	Y280_G9	Y280_G9	TRUE
EPI_ISL_335	A/chicken/Kobe/aq26/2001	Y280_G9	Y280_G9	TRUE
EPI_ISL_2238	A/chicken/Ningxia/5/99	Y280_G9	Y280_G9	TRUE
EPI_ISL_333	A/chicken/Osaka/aq48/97	Y280_G9	Y280_G9	TRUE
EPI_ISL_337	A/chicken/Osaka/aq69/2001	Y280_G9	Y280_G9	TRUE
EPI_ISL_82191	A/chicken/Shandong/1/2008	Y280_G9	Y280_G9	TRUE
EPI_ISL_24712	A/chicken/Shandong/2/2003	Y280_G9	Y280_G9	TRUE
EPI_ISL_84313	A/chicken/Shandong/2h/2001	Y280_G9	Y280_G9	TRUE
EPI_ISL_2240	A/chicken/Shandong/6/96	Y280_G9	Y280_G9	TRUE
EPI_ISL_8513	A/chicken/Shandong/7/96	Y280_G9	Y280_G9	TRUE
EPI_ISL_77228	A/chicken/Shandong/JN4/2005	Y280_G9	Y280_G9	TRUE
EPI_ISL_77229	A/chicken/Shandong/JN5/2005	Y280_G9	Y280_G9	TRUE
EPI_ISL_82537	A/chicken/Shandong/SD0014/2008	Y280_G9	Y280_G9	TRUE
EPI_ISL_8514	A/chicken/Shanghai/10/01	Y280_G9	Y280_G9	TRUE
EPI_ISL_25002	A/chicken/Shanghai/12/2001	Y280_G9	Y280_G9	TRUE
EPI_ISL_25003	A/chicken/Shanghai/14/2001	Y280_G9	Y280_G9	TRUE
EPI_ISL_24997	A/chicken/Shanghai/2/1999	Y280_G9	Y280_G9	TRUE
EPI_ISL_2163	A/chicken/Shanghai/3/00	Y280_G9	Y280_G9	TRUE
EPI_ISL_3093	A/chicken/Shanghai/4/01	Y280_G9	Y280_G9	TRUE
EPI_ISL_2165	A/chicken/Shanghai/4-2/01	Y280_G9	Y280_G9	TRUE
EPI_ISL_25001	A/chicken/Shanghai/7/2001	Y280_G9	Y280_G9	TRUE
EPI_ISL_68579	A/chicken/Shanghai/F/98	Y280_G9	Y280_G9	TRUE
EPI_ISL_7475	A/chicken/Shantou/1322/2000	Y280_G9	Y280_G9	TRUE
EPI_ISL_7477	A/chicken/Shantou/1690/2000	Y280_G9	Y280_G9	TRUE
EPI_ISL_7472	A/chicken/Shantou/94/2000	Y280_G9	Y280_G9	TRUE
EPI_ISL_2242	A/chicken/Shenzhen/9/97	Y280_G9	Y280_G9	TRUE
EPI_ISL_8515	A/chicken/Shijiazhuang/2/98	Y280_G9	Y280_G9	TRUE
EPI_ISL_2239	A/chicken/Sichuan/5/97	Y280_G9	Y280_G9	TRUE
EPI_ISL_2167	A/chicken/Tianjing/2/96	Y280_G9	Y280_G9	TRUE
EPI_ISL_339	A/chicken/Yokohama/aq134/2002	Y280_G9	Y280_G9	TRUE
EPI_ISL_338	A/chicken/Yokohama/aq45/2002	Y280_G9	Y280_G9	TRUE
EPI_ISL_7385	A/chicken/Yunnan/1147/2003	Y280_G9	Y280_G9	TRUE
EPI_ISL_2169	A/chicken/Yunnan/2/00	Y280_G9	Y280_G9	TRUE
EPI_ISL_7388	A/chicken/Yunnan/3511/2004	Y280_G9	Y280_G9	TRUE
EPI_ISL_7389	A/chicken/Yunnan/3727/2004	Y280_G9	Y280_G9	TRUE
EPI_ISL_7382	A/chicken/Yunnan/401/2002	Y280_G9	Y280_G9	TRUE
EPI_ISL_7383	A/chicken/Yunnan/522/2002	Y280_G9	Y280_G9	TRUE
EPI_ISL_7386	A/chicken/Yunnan/5653/2003	Y280_G9	Y280_G9	TRUE
EPI_ISL_68028	A/chicken/Yunnan/nh/2001	Y280_G9	Y280_G9	TRUE
EPI_ISL_29377	A/duck/Hong_Kong/W213/1997	Y280_G9	Y280_G9	TRUE
EPI_ISL_34046	A/duck/Jiangsu/9/2004	Y280_G9	Y280_G9	TRUE
EPI_ISL_10366	A/duck/Xuzhou/05/2001	Y280_G9	Y280_G9	TRUE
EPI_ISL_10364	A/duck/Zhejiang/03/2001	Y280_G9	Y280_G9	TRUE
EPI_ISL_97019	A/environment/Hong_Kong/1226/1999	Y280_G9	Y280_G9	TRUE
EPI_ISL_3199	A/quail/Nanchang/2-0460/2000	Y280_G9	Y280_G9	TRUE
EPI_ISL_70609	A/sparrow/Guangxi/09/2005	Y280_G9	Y280_G9	TRUE
EPI_ISL_70614	A/sparrow/Guangxi/121/2007	Y280_G9	Y280_G9	TRUE
EPI_ISL_70613	A/sparrow/Guangxi/93/2006	Y280_G9	Y280_G9	TRUE
EPI_ISL_12580	A/swine/Guangxi/58/2005	Y280_G9	Y280_G9	TRUE
EPI_ISL_13020	A/swine/Guangxi/FS2/2005	Y280_G9	Y280_G9	TRUE
EPI_ISL_13023	A/swine/Guangxi/S11/2005	Y280_G9	Y280_G9	TRUE
EPI_ISL_141	A/swine/Hong_Kong/10/98	Y280_G9	Y280_G9	TRUE
EPI_ISL_142	A/swine/Hong_Kong/9/98	Y280_G9	Y280_G9	TRUE
EPI_ISL_84311	A/swine/Shandong/3/2003	Y280_G9	Y280_G9	TRUE
EPI_ISL_84312	A/swine/Shandong/8/2003	Y280_G9	Y280_G9	TRUE
EPI_ISL_67426	A/swine/Shandong/fHZ/2003	Y280_G9	Y280_G9	TRUE
EPI_ISL_67422	A/swine/Shandong/na/2003	Y280_G9	Y280_G9	TRUE
EPI_ISL_64951	A/swine/Shandong/nc/2005	Y280_G9	Y280_G9	TRUE
EPI_ISL_67424	A/swine/Shandong/w4/2003	Y280_G9	Y280_G9	TRUE
EPI_ISL_62989	A/chicken/Anhui/G24/2008	Y280_Sha_ZB07	Y280_Sha_ZB07	TRUE
EPI_ISL_76662	A/chicken/Hebei/Y2/2009	Y280_Sha_ZB07	Y280_Sha_ZB07	TRUE
EPI_ISL_24736	A/chicken/Shandong/lx414/2007	Y280_Sha_ZB07	Y280_Sha_ZB07	TRUE
EPI_ISL_13019	A/bird/Guangxi/A1/2006	Y280B	Y280B	TRUE
EPI_ISL_93624	A/canine/Guangxi/1/2011/H9N2	Y280B	Y280B	TRUE
EPI_ISL_98117	A/chicken/Anhui/A12/2011	Y280B	Y280B	TRUE
EPI_ISL_97594	A/chicken/Anhui/A19/2010	Y280B	Y280B	TRUE
EPI_ISL_97593	A/chicken/Anhui/A20/2010	Y280B	Y280B	TRUE
EPI_ISL_97592	A/chicken/Anhui/A25/2010	Y280B	Y280B	TRUE
EPI_ISL_98101	A/chicken/Anhui/A9/2011	Y280B	Y280B	TRUE
EPI_ISL_29161	A/chicken/Anhui/AH16/2008	Y280B	Y280B	TRUE
EPI_ISL_29162	A/chicken/Anhui/AH23/2008	Y280B	Y280B	TRUE
EPI_ISL_29163	A/chicken/Anhui/AI16/2008	Y280B	Y280B	TRUE
EPI_ISL_29164	A/chicken/Anhui/AK13/2008	Y280B	Y280B	TRUE
EPI_ISL_29165	A/chicken/Anhui/AK25/2008	Y280B	Y280B	TRUE
EPI_ISL_97650	A/chicken/Anhui/B20/2010	Y280B	Y280B	TRUE
EPI_ISL_97751	A/chicken/Anhui/B24/2011	Y280B	Y280B	TRUE
EPI_ISL_98100	A/chicken/Anhui/D14/2011	Y280B	Y280B	TRUE
EPI_ISL_97584	A/chicken/Anhui/D25/2010	Y280B	Y280B	TRUE
EPI_ISL_97750	A/chicken/Anhui/D3/2011	Y280B	Y280B	TRUE
EPI_ISL_98099	A/chicken/Anhui/D30/2011	Y280B	Y280B	TRUE
EPI_ISL_98093	A/chicken/Anhui/E22/2011	Y280B	Y280B	TRUE
EPI_ISL_98089	A/chicken/Anhui/E26/2011	Y280B	Y280B	TRUE
EPI_ISL_97738	A/chicken/Anhui/F31/2011	Y280B	Y280B	TRUE
EPI_ISL_97642	A/chicken/Anhui/G15/2010	Y280B	Y280B	TRUE
EPI_ISL_97639	A/chicken/Anhui/G18/2010	Y280B	Y280B	TRUE
EPI_ISL_97734	A/chicken/Anhui/G18/2011	Y280B	Y280B	TRUE
EPI_ISL_62988	A/chicken/Anhui/G20/2008	Y280B	Y280B	TRUE
EPI_ISL_97737	A/chicken/Anhui/G6/2011	Y280B	Y280B	TRUE
EPI_ISL_98069	A/chicken/Anhui/I24/2011	Y280B	Y280B	TRUE
EPI_ISL_98064	A/chicken/Anhui/I4/2011	Y280B	Y280B	TRUE
EPI_ISL_97726	A/chicken/Anhui/J19/2011	Y280B	Y280B	TRUE
EPI_ISL_97709	A/chicken/Anhui/M18/2011	Y280B	Y280B	TRUE
EPI_ISL_97717	A/chicken/Anhui/M2/2011	Y280B	Y280B	TRUE
EPI_ISL_97715	A/chicken/Anhui/M5/2011	Y280B	Y280B	TRUE
EPI_ISL_89750	A/chicken/Anhui/XMS/2011	Y280B	Y280B	TRUE
EPI_ISL_89715	A/chicken/Anhui/ZTL/2011	Y280B	Y280B	TRUE
EPI_ISL_99613	A/chicken/Anhui/ZYX05/2011	Y280B	Y280B	TRUE
EPI_ISL_84536	A/chicken/Baoshan/111/2009	Y280B	Y280B	TRUE
EPI_ISL_84544	A/chicken/Baoshan/711/2008	Y280B	Y280B	TRUE
EPI_ISL_84333	A/chicken/Beijing/1/2006	Y280B	Y280B	TRUE
EPI_ISL_4042	A/chicken/Beijing/9/98	Y280B	Y280B	TRUE
EPI_ISL_13996	A/chicken/Beijing/L1/2005	Y280B	Y280B	TRUE
EPI_ISL_90154	A/chicken/China/AH-10-01/2010	Y280B	Y280B	TRUE
EPI_ISL_10168	A/chicken/China/Guangxi1/2000	Y280B	Y280B	TRUE
EPI_ISL_10169	A/chicken/China/Guangxi14/2000	Y280B	Y280B	TRUE
EPI_ISL_10170	A/chicken/China/Guangxi17/2000	Y280B	Y280B	TRUE
EPI_ISL_97669	A/chicken/Chongqing/A56/2011	Y280B	Y280B	TRUE
EPI_ISL_97660	A/chicken/Chongqing/D17/2011	Y280B	Y280B	TRUE
EPI_ISL_98034	A/chicken/Chongqing/G10/2011	Y280B	Y280B	TRUE
EPI_ISL_98031	A/chicken/Chongqing/G14/2011	Y280B	Y280B	TRUE
EPI_ISL_98029	A/chicken/Chongqing/G21/2011	Y280B	Y280B	TRUE
EPI_ISL_98027	A/chicken/Chongqing/G25/2011	Y280B	Y280B	TRUE
EPI_ISL_97671	A/chicken/Chongqing/K16/2011	Y280B	Y280B	TRUE
EPI_ISL_97663	A/chicken/Chongqing/K23/2011	Y280B	Y280B	TRUE
EPI_ISL_97670	A/chicken/Chongqing/K3/2011	Y280B	Y280B	TRUE
EPI_ISL_97672	A/chicken/Chongqing/K7/2011	Y280B	Y280B	TRUE
EPI_ISL_84540	A/chicken/Dehong/411/2009	Y280B	Y280B	TRUE
EPI_ISL_7359	A/chicken/Fujian/10954/2005	Y280B	Y280B	TRUE
EPI_ISL_7360	A/chicken/Fujian/11302/2005	Y280B	Y280B	TRUE
EPI_ISL_7362	A/chicken/Fujian/12252/2005	Y280B	Y280B	TRUE
EPI_ISL_7344	A/chicken/Fujian/3080/2005	Y280B	Y280B	TRUE
EPI_ISL_7345	A/chicken/Fujian/4332/2005	Y280B	Y280B	TRUE
EPI_ISL_7346	A/chicken/Fujian/4820/2005	Y280B	Y280B	TRUE
EPI_ISL_7348	A/chicken/Fujian/5683/2005	Y280B	Y280B	TRUE
EPI_ISL_7349	A/chicken/Fujian/6188/2005	Y280B	Y280B	TRUE
EPI_ISL_7351	A/chicken/Fujian/7386/2005	Y280B	Y280B	TRUE
EPI_ISL_7352	A/chicken/Fujian/7884/2005	Y280B	Y280B	TRUE
EPI_ISL_29156	A/chicken/Fujian/FB21/2007	Y280B	Y280B	TRUE
EPI_ISL_29155	A/chicken/Fujian/FB22/2007	Y280B	Y280B	TRUE
EPI_ISL_29154	A/chicken/Fujian/FG13/2007	Y280B	Y280B	TRUE
EPI_ISL_29152	A/chicken/Fujian/FH7/2007	Y280B	Y280B	TRUE
EPI_ISL_89652	A/chicken/Fujian/G9/2009	Y280B	Y280B	TRUE
EPI_ISL_99614	A/chicken/Fujian/HJF04/2011	Y280B	Y280B	TRUE
EPI_ISL_89733	A/chicken/Fujian/SL4/2011	Y280B	Y280B	TRUE
EPI_ISL_2155	A/chicken/Gangxi/1/00	Y280B	Y280B	TRUE
EPI_ISL_24917	A/chicken/Guangdong/02/2007	Y280B	Y280B	TRUE
EPI_ISL_24718	A/chicken/Guangdong/1/2002	Y280B	Y280B	TRUE
EPI_ISL_2233	A/chicken/Guangdong/10/00	Y280B	Y280B	TRUE
EPI_ISL_8495	A/chicken/Guangdong/21/02	Y280B	Y280B	TRUE
EPI_ISL_24722	A/chicken/Guangdong/22/2001	Y280B	Y280B	TRUE
EPI_ISL_8496	A/chicken/Guangdong/4/00	Y280B	Y280B	TRUE
EPI_ISL_8497	A/chicken/Guangdong/47/01	Y280B	Y280B	TRUE
EPI_ISL_69427	A/chicken/Guangdong/A10/2007	Y280B	Y280B	TRUE
EPI_ISL_69425	A/chicken/Guangdong/A3/2003	Y280B	Y280B	TRUE
EPI_ISL_69429	A/chicken/Guangdong/A4/2003	Y280B	Y280B	TRUE
EPI_ISL_69426	A/chicken/Guangdong/A5/2003	Y280B	Y280B	TRUE
EPI_ISL_69421	A/chicken/Guangdong/A6/2003	Y280B	Y280B	TRUE
EPI_ISL_69415	A/chicken/Guangdong/A7/2002	Y280B	Y280B	TRUE
EPI_ISL_69428	A/chicken/Guangdong/B2/2006	Y280B	Y280B	TRUE
EPI_ISL_69418	A/chicken/Guangdong/B5/2002	Y280B	Y280B	TRUE
EPI_ISL_69419	A/chicken/Guangdong/B7/2003	Y280B	Y280B	TRUE
EPI_ISL_69417	A/chicken/Guangdong/B9/2002	Y280B	Y280B	TRUE
EPI_ISL_97515	A/chicken/Guangdong/D2/2010	Y280B	Y280B	TRUE
EPI_ISL_97514	A/chicken/Guangdong/D4/2010	Y280B	Y280B	TRUE
EPI_ISL_97512	A/chicken/Guangdong/D8/2010	Y280B	Y280B	TRUE
EPI_ISL_99619	A/chicken/Guangdong/DJN03/2011	Y280B	Y280B	TRUE
EPI_ISL_69411	A/chicken/Guangdong/E25/2008	Y280B	Y280B	TRUE
EPI_ISL_69430	A/chicken/Guangdong/G7/2009	Y280B	Y280B	TRUE
EPI_ISL_23098	A/chicken/Guangdong/GZ02/2008	Y280B	Y280B	TRUE
EPI_ISL_97510	A/chicken/Guangdong/H11/2010	Y280B	Y280B	TRUE
EPI_ISL_97508	A/chicken/Guangdong/H28/2010	Y280B	Y280B	TRUE
EPI_ISL_97507	A/chicken/Guangdong/H29/2010	Y280B	Y280B	TRUE
EPI_ISL_69412	A/chicken/Guangdong/HE10/2009	Y280B	Y280B	TRUE
EPI_ISL_69424	A/chicken/Guangdong/HE12/2008	Y280B	Y280B	TRUE
EPI_ISL_69423	A/chicken/Guangdong/HE20/2008	Y280B	Y280B	TRUE
EPI_ISL_69413	A/chicken/Guangdong/HE21/2008	Y280B	Y280B	TRUE
EPI_ISL_69414	A/chicken/Guangdong/HE22/2008	Y280B	Y280B	TRUE
EPI_ISL_83298	A/chicken/Guangdong/L14/2009	Y280B	Y280B	TRUE
EPI_ISL_89648	A/chicken/Guangdong/Q6/2010	Y280B	Y280B	TRUE
EPI_ISL_83299	A/chicken/Guangdong/Y1/2009	Y280B	Y280B	TRUE
EPI_ISL_83297	A/chicken/Guangdongg/G9/2009	Y280B	Y280B	TRUE
EPI_ISL_13013	A/chicken/Guangxi/55/2005	Y280B	Y280B	TRUE
EPI_ISL_13012	A/chicken/Guangxi/6/2000	Y280B	Y280B	TRUE
EPI_ISL_69407	A/chicken/Guangxi/G8/2009	Y280B	Y280B	TRUE
EPI_ISL_99615	A/chicken/Guangxi/LRW04/2011	Y280B	Y280B	TRUE
EPI_ISL_89742	A/chicken/Guangxi/MFX/2011	Y280B	Y280B	TRUE
EPI_ISL_77226	A/chicken/Guangzhou/GZ/2005	Y280B	Y280B	TRUE
EPI_ISL_97579	A/chicken/Guizhou/D15/2010	Y280B	Y280B	TRUE
EPI_ISL_83288	A/chicken/Guizhou/D26/2009	Y280B	Y280B	TRUE
EPI_ISL_97703	A/chicken/Guizhou/D26/2011	Y280B	Y280B	TRUE
EPI_ISL_97572	A/chicken/Guizhou/E23/2010	Y280B	Y280B	TRUE
EPI_ISL_97571	A/chicken/Guizhou/E25/2010	Y280B	Y280B	TRUE
EPI_ISL_97570	A/chicken/Guizhou/E29/2010	Y280B	Y280B	TRUE
EPI_ISL_97577	A/chicken/Guizhou/E3/2010	Y280B	Y280B	TRUE
EPI_ISL_97575	A/chicken/Guizhou/E9/2010	Y280B	Y280B	TRUE
EPI_ISL_83290	A/chicken/Guizhou/Q16/2009	Y280B	Y280B	TRUE
EPI_ISL_99616	A/chicken/Guizhou/XK04/2011	Y280B	Y280B	TRUE
EPI_ISL_98004	A/chicken/Hainan/A4/2011	Y280B	Y280B	TRUE
EPI_ISL_97995	A/chicken/Hainan/J19/2011	Y280B	Y280B	TRUE
EPI_ISL_97992	A/chicken/Hainan/J3/2011	Y280B	Y280B	TRUE
EPI_ISL_89649	A/chicken/Hainan/Q4/2010	Y280B	Y280B	TRUE
EPI_ISL_84330	A/chicken/Hebei/0329/2007	Y280B	Y280B	TRUE
EPI_ISL_84328	A/chicken/Hebei/0822/2007	Y280B	Y280B	TRUE
EPI_ISL_2444	A/chicken/Hebei/2/98	Y280B	Y280B	TRUE
EPI_ISL_2235	A/chicken/Hebei/4/98	Y280B	Y280B	TRUE
EPI_ISL_84327	A/chicken/Hebei/C6/2007	Y280B	Y280B	TRUE
EPI_ISL_84326	A/chicken/Hebei/LC/2008	Y280B	Y280B	TRUE
EPI_ISL_8505	A/chicken/Heilongjiang/48/01	Y280B	Y280B	TRUE
EPI_ISL_24709	A/chicken/Henan/1/2001	Y280B	Y280B	TRUE
EPI_ISL_67372	A/chicken/Henan/1/2003	Y280B	Y280B	TRUE
EPI_ISL_8507	A/chicken/Henan/43/02	Y280B	Y280B	TRUE
EPI_ISL_8508	A/chicken/Henan/5/98	Y280B	Y280B	TRUE
EPI_ISL_2237	A/chicken/Henan/62/00	Y280B	Y280B	TRUE
EPI_ISL_24711	A/chicken/Henan/622/2006	Y280B	Y280B	TRUE
EPI_ISL_68577	A/chicken/Henan/98	Y280B	Y280B	TRUE
EPI_ISL_97583	A/chicken/Henan/A16/2010	Y280B	Y280B	TRUE
EPI_ISL_12623	A/chicken/Henan/A3/1998	Y280B	Y280B	TRUE
EPI_ISL_97700	A/chicken/Henan/D17/2011	Y280B	Y280B	TRUE
EPI_ISL_97981	A/chicken/Henan/D21/2011	Y280B	Y280B	TRUE
EPI_ISL_97973	A/chicken/Henan/E18/2011	Y280B	Y280B	TRUE
EPI_ISL_97632	A/chicken/Henan/E2/2010	Y280B	Y280B	TRUE
EPI_ISL_97972	A/chicken/Henan/E2/2011	Y280B	Y280B	TRUE
EPI_ISL_97971	A/chicken/Henan/E21/2011	Y280B	Y280B	TRUE
EPI_ISL_97970	A/chicken/Henan/E24/2011	Y280B	Y280B	TRUE
EPI_ISL_97630	A/chicken/Henan/F14/2010	Y280B	Y280B	TRUE
EPI_ISL_97958	A/chicken/Henan/F16/2011	Y280B	Y280B	TRUE
EPI_ISL_97955	A/chicken/Henan/F21/2011	Y280B	Y280B	TRUE
EPI_ISL_97947	A/chicken/Henan/F5/2011	Y280B	Y280B	TRUE
EPI_ISL_97631	A/chicken/Henan/F8/2010	Y280B	Y280B	TRUE
EPI_ISL_97625	A/chicken/Henan/G1/2010	Y280B	Y280B	TRUE
EPI_ISL_97617	A/chicken/Henan/G15/2010	Y280B	Y280B	TRUE
EPI_ISL_97942	A/chicken/Henan/G15/2011	Y280B	Y280B	TRUE
EPI_ISL_97615	A/chicken/Henan/G19/2010	Y280B	Y280B	TRUE
EPI_ISL_97624	A/chicken/Henan/G4/2010	Y280B	Y280B	TRUE
EPI_ISL_97915	A/chicken/Henan/H26/2011	Y280B	Y280B	TRUE
EPI_ISL_97912	A/chicken/Henan/H29/2011	Y280B	Y280B	TRUE
EPI_ISL_97905	A/chicken/Henan/I27/2011	Y280B	Y280B	TRUE
EPI_ISL_3216	A/chicken/Hong_Kong/WF2/99	Y280B	Y280B	TRUE
EPI_ISL_4452	A/chicken/HongKong/AP45/03	Y280B	Y280B	TRUE
EPI_ISL_4455	A/chicken/HongKong/CSW304/03	Y280B	Y280B	TRUE
EPI_ISL_4458	A/chicken/HongKong/NT142/03	Y280B	Y280B	TRUE
EPI_ISL_4459	A/chicken/HongKong/SF1/03	Y280B	Y280B	TRUE
EPI_ISL_4461	A/chicken/HongKong/TP38/03	Y280B	Y280B	TRUE
EPI_ISL_4466	A/chicken/HongKong/WF120/03	Y280B	Y280B	TRUE
EPI_ISL_4462	A/chicken/HongKong/WF126/03	Y280B	Y280B	TRUE
EPI_ISL_97682	A/chicken/Hubei/558/2011	Y280B	Y280B	TRUE
EPI_ISL_97679	A/chicken/Hubei/661/2011	Y280B	Y280B	TRUE
EPI_ISL_97551	A/chicken/Hubei/A23/2010	Y280B	Y280B	TRUE
EPI_ISL_97550	A/chicken/Hubei/A25/2010	Y280B	Y280B	TRUE
EPI_ISL_97548	A/chicken/Hubei/A28/2010	Y280B	Y280B	TRUE
EPI_ISL_97552	A/chicken/Hubei/A4/2010	Y280B	Y280B	TRUE
EPI_ISL_97544	A/chicken/Hubei/D2/2010	Y280B	Y280B	TRUE
EPI_ISL_69396	A/chicken/Hubei/E13/2008	Y280B	Y280B	TRUE
EPI_ISL_97533	A/chicken/Hubei/E17/2010	Y280B	Y280B	TRUE
EPI_ISL_97532	A/chicken/Hubei/E18/2010	Y280B	Y280B	TRUE
EPI_ISL_97528	A/chicken/Hubei/E23/2010	Y280B	Y280B	TRUE
EPI_ISL_97520	A/chicken/Hubei/G10/2010	Y280B	Y280B	TRUE
EPI_ISL_97517	A/chicken/Hubei/G21/2010	Y280B	Y280B	TRUE
EPI_ISL_97516	A/chicken/Hubei/G27/2010	Y280B	Y280B	TRUE
EPI_ISL_97523	A/chicken/Hubei/G5/2010	Y280B	Y280B	TRUE
EPI_ISL_97522	A/chicken/Hubei/G6/2010	Y280B	Y280B	TRUE
EPI_ISL_97521	A/chicken/Hubei/G9/2010	Y280B	Y280B	TRUE
EPI_ISL_89723	A/chicken/Hubei/GYC/2011	Y280B	Y280B	TRUE
EPI_ISL_69398	A/chicken/Hubei/HE27/2008	Y280B	Y280B	TRUE
EPI_ISL_7375	A/chicken/Hunan/3369/2005	Y280B	Y280B	TRUE
EPI_ISL_7378	A/chicken/Hunan/4444/2005	Y280B	Y280B	TRUE
EPI_ISL_7380	A/chicken/Hunan/5700/2005	Y280B	Y280B	TRUE
EPI_ISL_7381	A/chicken/Hunan/6108/2005	Y280B	Y280B	TRUE
EPI_ISL_29150	A/chicken/Hunan/HA17/2007	Y280B	Y280B	TRUE
EPI_ISL_29149	A/chicken/Hunan/HB25/2007	Y280B	Y280B	TRUE
EPI_ISL_29148	A/chicken/Hunan/HB29/2007	Y280B	Y280B	TRUE
EPI_ISL_29166	A/chicken/Hunan/HB5/2007	Y280B	Y280B	TRUE
EPI_ISL_29167	A/chicken/Hunan/HE5/2007	Y280B	Y280B	TRUE
EPI_ISL_73326	A/chicken/Jiande/01/2009	Y280B	Y280B	TRUE
EPI_ISL_8510	A/chicken/Jiangsu/1/00	Y280B	Y280B	TRUE
EPI_ISL_97565	A/chicken/Jiangsu/A20/2010	Y280B	Y280B	TRUE
EPI_ISL_97569	A/chicken/Jiangsu/A7/2010	Y280B	Y280B	TRUE
EPI_ISL_97568	A/chicken/Jiangsu/A9/2010	Y280B	Y280B	TRUE
EPI_ISL_97879	A/chicken/Jiangsu/B13/2011	Y280B	Y280B	TRUE
EPI_ISL_97867	A/chicken/Jiangsu/B4/2011	Y280B	Y280B	TRUE
EPI_ISL_97862	A/chicken/Jiangsu/D10/2011	Y280B	Y280B	TRUE
EPI_ISL_69397	A/chicken/Jiangsu/E26/2007	Y280B	Y280B	TRUE
EPI_ISL_99618	A/chicken/Jiangsu/FQD03/2011	Y280B	Y280B	TRUE
EPI_ISL_97612	A/chicken/Jiangsu/G12/2010	Y280B	Y280B	TRUE
EPI_ISL_97561	A/chicken/Jiangsu/H10/2010	Y280B	Y280B	TRUE
EPI_ISL_97860	A/chicken/Jiangsu/H10/2011	Y280B	Y280B	TRUE
EPI_ISL_97560	A/chicken/Jiangsu/H11/2010	Y280B	Y280B	TRUE
EPI_ISL_97859	A/chicken/Jiangsu/H13/2011	Y280B	Y280B	TRUE
EPI_ISL_97858	A/chicken/Jiangsu/H2/2011	Y280B	Y280B	TRUE
EPI_ISL_97853	A/chicken/Jiangsu/I2/2011	Y280B	Y280B	TRUE
EPI_ISL_97852	A/chicken/Jiangsu/I20/2011	Y280B	Y280B	TRUE
EPI_ISL_89740	A/chicken/Jiangsu/LWC/2011	Y280B	Y280B	TRUE
EPI_ISL_89646	A/chicken/Jiangsu/U1/2010	Y280B	Y280B	TRUE
EPI_ISL_89645	A/chicken/Jiangsu/U2/2010	Y280B	Y280B	TRUE
EPI_ISL_89644	A/chicken/Jiangsu/U3/2010	Y280B	Y280B	TRUE
EPI_ISL_89734	A/chicken/Jiangsu/WXY/2011	Y280B	Y280B	TRUE
EPI_ISL_89727	A/chicken/Jiangsu/ZHM/2011	Y280B	Y280B	TRUE
EPI_ISL_84325	A/chicken/Jiangxi/12/2007	Y280B	Y280B	TRUE
EPI_ISL_8509	A/chicken/Jilin/53/01	Y280B	Y280B	TRUE
EPI_ISL_83291	A/chicken/Jilin/G12/2009	Y280B	Y280B	TRUE
EPI_ISL_2160	A/chicken/Liaoning/2/00	Y280B	Y280B	TRUE
EPI_ISL_63461	A/chicken/Liaoning/21/7/2007	Y280B	Y280B	TRUE
EPI_ISL_29160	A/chicken/Liaoning/3/2007	Y280B	Y280B	TRUE
EPI_ISL_63462	A/chicken/Liaoning/41/17/2007	Y280B	Y280B	TRUE
EPI_ISL_84546	A/chicken/Lincang/711/2008	Y280B	Y280B	TRUE
EPI_ISL_97699	A/chicken/Ningxia/04/2011	Y280B	Y280B	TRUE
EPI_ISL_97692	A/chicken/Ningxia/102/2011	Y280B	Y280B	TRUE
EPI_ISL_97691	A/chicken/Ningxia/112/2011	Y280B	Y280B	TRUE
EPI_ISL_97689	A/chicken/Ningxia/153/2011	Y280B	Y280B	TRUE
EPI_ISL_97698	A/chicken/Ningxia/29/2011	Y280B	Y280B	TRUE
EPI_ISL_97696	A/chicken/Ningxia/31/2011	Y280B	Y280B	TRUE
EPI_ISL_97848	A/chicken/Ningxia/A1/2011	Y280B	Y280B	TRUE
EPI_ISL_97845	A/chicken/Ningxia/A2/2011	Y280B	Y280B	TRUE
EPI_ISL_97844	A/chicken/Ningxia/A21/2011	Y280B	Y280B	TRUE
EPI_ISL_83292	A/chicken/Ningxia/F15/2009	Y280B	Y280B	TRUE
EPI_ISL_83293	A/chicken/Ningxia/R13/2009	Y280B	Y280B	TRUE
EPI_ISL_342	A/chicken/Osaka/aq19/2001	Y280B	Y280B	TRUE
EPI_ISL_336	A/chicken/Osaka/aq58/2001	Y280B	Y280B	TRUE
EPI_ISL_84538	A/chicken/Puer/411/2009	Y280B	Y280B	TRUE
EPI_ISL_74004	A/chicken/Sandong/Li/2008	Y280B	Y280B	TRUE
EPI_ISL_67390	A/chicken/Shandong/1/2003	Y280B	Y280B	TRUE
EPI_ISL_84324	A/chicken/Shandong/1/2006	Y280B	Y280B	TRUE
EPI_ISL_2161	A/chicken/Shandong/1/98	Y280B	Y280B	TRUE
EPI_ISL_84323	A/chicken/Shandong/12/2008	Y280B	Y280B	TRUE
EPI_ISL_84321	A/chicken/Shandong/1231/2008	Y280B	Y280B	TRUE
EPI_ISL_84322	A/chicken/Shandong/22/2008	Y280B	Y280B	TRUE
EPI_ISL_80509	A/chicken/Shandong/A1/2009	Y280B	Y280B	TRUE
EPI_ISL_68379	A/chicken/Shandong/B1/2000	Y280B	Y280B	TRUE
EPI_ISL_82193	A/chicken/Shandong/C/2009	Y280B	Y280B	TRUE
EPI_ISL_24731	A/chicken/Shandong/cy1127/2007	Y280B	Y280B	TRUE
EPI_ISL_77200	A/chicken/Shandong/FX/2009	Y280B	Y280B	TRUE
EPI_ISL_97837	A/chicken/Shandong/H30/2011	Y280B	Y280B	TRUE
EPI_ISL_77198	A/chicken/Shandong/HY/2009	Y280B	Y280B	TRUE
EPI_ISL_97834	A/chicken/Shandong/J6/2011	Y280B	Y280B	TRUE
EPI_ISL_77230	A/chicken/Shandong/JN/1999	Y280B	Y280B	TRUE
EPI_ISL_97247	A/chicken/Shandong/K/2010	Y280B	Y280B	TRUE
EPI_ISL_97246	A/chicken/Shandong/L/2010	Y280B	Y280B	TRUE
EPI_ISL_24732	A/chicken/Shandong/lc1124/2007	Y280B	Y280B	TRUE
EPI_ISL_77231	A/chicken/Shandong/LW/1999	Y280B	Y280B	TRUE
EPI_ISL_24737	A/chicken/Shandong/lx1023/2007	Y280B	Y280B	TRUE
EPI_ISL_24738	A/chicken/Shandong/lx1027/2007	Y280B	Y280B	TRUE
EPI_ISL_24733	A/chicken/Shandong/lx316/2008	Y280B	Y280B	TRUE
EPI_ISL_84320	A/chicken/Shandong/LY/2006	Y280B	Y280B	TRUE
EPI_ISL_77232	A/chicken/Shandong/LY/2008	Y280B	Y280B	TRUE
EPI_ISL_97245	A/chicken/Shandong/M/2010	Y280B	Y280B	TRUE
EPI_ISL_24741	A/chicken/Shandong/mp1224/2007	Y280B	Y280B	TRUE
EPI_ISL_97244	A/chicken/Shandong/N/2010	Y280B	Y280B	TRUE
EPI_ISL_77197	A/chicken/Shandong/PD/2009	Y280B	Y280B	TRUE
EPI_ISL_24920	A/chicken/Shandong/qd04/2007	Y280B	Y280B	TRUE
EPI_ISL_77233	A/chicken/Shandong/S2/2005	Y280B	Y280B	TRUE
EPI_ISL_77201	A/chicken/Shandong/SG1/2009	Y280B	Y280B	TRUE
EPI_ISL_77202	A/chicken/Shandong/SG2/2009	Y280B	Y280B	TRUE
EPI_ISL_97602	A/chicken/Shandong/TH9/2010	Y280B	Y280B	TRUE
EPI_ISL_24922	A/chicken/Shandong/wd01/2007	Y280B	Y280B	TRUE
EPI_ISL_97830	A/chicken/Shandong/WE11/2011	Y280B	Y280B	TRUE
EPI_ISL_97823	A/chicken/Shandong/WE26/2011	Y280B	Y280B	TRUE
EPI_ISL_97812	A/chicken/Shandong/WG10/2011	Y280B	Y280B	TRUE
EPI_ISL_97810	A/chicken/Shandong/WG16/2011	Y280B	Y280B	TRUE
EPI_ISL_77199	A/chicken/Shandong/WL/2009	Y280B	Y280B	TRUE
EPI_ISL_24742	A/chicken/Shandong/yt1105/2007	Y280B	Y280B	TRUE
EPI_ISL_24730	A/chicken/Shandong/zc820/2006	Y280B	Y280B	TRUE
EPI_ISL_7480	A/chicken/Shantou/1126/2001	Y280B	Y280B	TRUE
EPI_ISL_7313	A/chicken/Shantou/1138/2004	Y280B	Y280B	TRUE
EPI_ISL_7481	A/chicken/Shantou/1205/2001	Y280B	Y280B	TRUE
EPI_ISL_7300	A/chicken/Shantou/1404/2003	Y280B	Y280B	TRUE
EPI_ISL_7476	A/chicken/Shantou/1579/2000	Y280B	Y280B	TRUE
EPI_ISL_7483	A/chicken/Shantou/1608/2001	Y280B	Y280B	TRUE
EPI_ISL_7301	A/chicken/Shantou/1689/2003	Y280B	Y280B	TRUE
EPI_ISL_7338	A/chicken/Shantou/17139/2005	Y280B	Y280B	TRUE
EPI_ISL_7315	A/chicken/Shantou/1926/2004	Y280B	Y280B	TRUE
EPI_ISL_7339	A/chicken/Shantou/19465/2005	Y280B	Y280B	TRUE
EPI_ISL_7340	A/chicken/Shantou/20817/2005	Y280B	Y280B	TRUE
EPI_ISL_7473	A/chicken/Shantou/212/2000	Y280B	Y280B	TRUE
EPI_ISL_7341	A/chicken/Shantou/22054/2005	Y280B	Y280B	TRUE
EPI_ISL_7302	A/chicken/Shantou/2686/2003	Y280B	Y280B	TRUE
EPI_ISL_7317	A/chicken/Shantou/2692/2004	Y280B	Y280B	TRUE
EPI_ISL_7487	A/chicken/Shantou/2712/2001	Y280B	Y280B	TRUE
EPI_ISL_7318	A/chicken/Shantou/2994/2004	Y280B	Y280B	TRUE
EPI_ISL_7304	A/chicken/Shantou/3341/2003	Y280B	Y280B	TRUE
EPI_ISL_7489	A/chicken/Shantou/3778/2001	Y280B	Y280B	TRUE
EPI_ISL_7294	A/chicken/Shantou/4144/2002	Y280B	Y280B	TRUE
EPI_ISL_7490	A/chicken/Shantou/4208/2001	Y280B	Y280B	TRUE
EPI_ISL_7295	A/chicken/Shantou/4342/2002	Y280B	Y280B	TRUE
EPI_ISL_7491	A/chicken/Shantou/5028/2001	Y280B	Y280B	TRUE
EPI_ISL_7292	A/chicken/Shantou/526/2002	Y280B	Y280B	TRUE
EPI_ISL_7492	A/chicken/Shantou/5319/2001	Y280B	Y280B	TRUE
EPI_ISL_7328	A/chicken/Shantou/55/2005	Y280B	Y280B	TRUE
EPI_ISL_7320	A/chicken/Shantou/5630/2004	Y280B	Y280B	TRUE
EPI_ISL_7297	A/chicken/Shantou/69/2003	Y280B	Y280B	TRUE
EPI_ISL_7325	A/chicken/Shantou/6911/2004	Y280B	Y280B	TRUE
EPI_ISL_7327	A/chicken/Shantou/7920/2004	Y280B	Y280B	TRUE
EPI_ISL_7309	A/chicken/Shantou/99/2004	Y280B	Y280B	TRUE
EPI_ISL_7336	A/chicken/Shantou/9909/2005	Y280B	Y280B	TRUE
EPI_ISL_97676	A/chicken/Shanxi/38/2011	Y280B	Y280B	TRUE
EPI_ISL_97674	A/chicken/Shanxi/43/2011	Y280B	Y280B	TRUE
EPI_ISL_97799	A/chicken/Shanxi/B29/2011	Y280B	Y280B	TRUE
EPI_ISL_97798	A/chicken/Shanxi/B3/2011	Y280B	Y280B	TRUE
EPI_ISL_97796	A/chicken/Shanxi/D24/2011	Y280B	Y280B	TRUE
EPI_ISL_97794	A/chicken/Shanxi/D30/2011	Y280B	Y280B	TRUE
EPI_ISL_97792	A/chicken/Shanxi/E30/2011	Y280B	Y280B	TRUE
EPI_ISL_83287	A/chicken/Shanxi/H14/2009	Y280B	Y280B	TRUE
EPI_ISL_97771	A/chicken/Shanxi/J4/2011	Y280B	Y280B	TRUE
EPI_ISL_97769	A/chicken/Shanxi/K1/2011	Y280B	Y280B	TRUE
EPI_ISL_69401	A/chicken/Sichuan/B1/2007	Y280B	Y280B	TRUE
EPI_ISL_69402	A/chicken/Sichuan/G2/2009	Y280B	Y280B	TRUE
EPI_ISL_69403	A/chicken/Sichuan/G3/2009	Y280B	Y280B	TRUE
EPI_ISL_69404	A/chicken/Sichuan/G4/2009	Y280B	Y280B	TRUE
EPI_ISL_69405	A/chicken/Sichuan/G5/2009	Y280B	Y280B	TRUE
EPI_ISL_69406	A/chicken/Sichuan/G6/2009	Y280B	Y280B	TRUE
EPI_ISL_83296	A/chicken/Tibet/L18/2009	Y280B	Y280B	TRUE
EPI_ISL_83295	A/chicken/Tibet/L7/2009	Y280B	Y280B	TRUE
EPI_ISL_89114	A/chicken/Tibet/S1/2009	Y280B	Y280B	TRUE
EPI_ISL_84541	A/chicken/Wenshan/412/2009	Y280B	Y280B	TRUE
EPI_ISL_83286	A/chicken/Xinjiang/07/2009	Y280B	Y280B	TRUE
EPI_ISL_29145	A/chicken/Xinjiang/XJ154/2007	Y280B	Y280B	TRUE
EPI_ISL_29146	A/chicken/Xinjiang/XJ75/2007	Y280B	Y280B	TRUE
EPI_ISL_77234	A/chicken/Yangzhou/YZ/2000	Y280B	Y280B	TRUE
EPI_ISL_13563	A/chicken/YN/BanNa2/2006	Y280B	Y280B	TRUE
EPI_ISL_340	A/chicken/Yokohama/aq135/2001	Y280B	Y280B	TRUE
EPI_ISL_343	A/chicken/Yokohama/aq144/2001	Y280B	Y280B	TRUE
EPI_ISL_334	A/chicken/Yokohama/aq55/2001	Y280B	Y280B	TRUE
EPI_ISL_13760	A/chicken/Yunnan/BaoShan3/2007	Y280B	Y280B	TRUE
EPI_ISL_13761	A/chicken/Yunnan/Chuxiong1/2007	Y280B	Y280B	TRUE
EPI_ISL_13763	A/chicken/Yunnan/Chuxiong3/2007	Y280B	Y280B	TRUE
EPI_ISL_63468	A/chicken/Yunnan/Kunming/2007	Y280B	Y280B	TRUE
EPI_ISL_19170	A/chicken/Yunnan/qujing09/07	Y280B	Y280B	TRUE
EPI_ISL_13769	A/chicken/Yunnan/Simao3/2007	Y280B	Y280B	TRUE
EPI_ISL_63469	A/chicken/Yunnan/Wenshan/2007	Y280B	Y280B	TRUE
EPI_ISL_29144	A/chicken/Yunnan/YA114/2007	Y280B	Y280B	TRUE
EPI_ISL_29143	A/chicken/Yunnan/YC12/2007	Y280B	Y280B	TRUE
EPI_ISL_13771	A/chicken/Yunnan/Yuxi2/2007	Y280B	Y280B	TRUE
EPI_ISL_63470	A/chicken/Yunnan/Zhaotong/2007	Y280B	Y280B	TRUE
EPI_ISL_84548	A/chicken/Yunnanbn/411/2009	Y280B	Y280B	TRUE
EPI_ISL_84545	A/chicken/Yunnandh/101/2008	Y280B	Y280B	TRUE
EPI_ISL_84547	A/chicken/Yunnanws/102/2008	Y280B	Y280B	TRUE
EPI_ISL_69441	A/chicken/Zhejiang/E5/2009	Y280B	Y280B	TRUE
EPI_ISL_89726	A/chicken/Zhejiang/FSQ/2011	Y280B	Y280B	TRUE
EPI_ISL_69437	A/chicken/Zhejiang/HE1/2009	Y280B	Y280B	TRUE
EPI_ISL_69434	A/chicken/Zhejiang/HE3/2009	Y280B	Y280B	TRUE
EPI_ISL_69435	A/chicken/Zhejiang/HE7/2009	Y280B	Y280B	TRUE
EPI_ISL_69433	A/chicken/Zhejiang/HF2/2009	Y280B	Y280B	TRUE
EPI_ISL_69432	A/chicken/Zhejiang/HF3/2009	Y280B	Y280B	TRUE
EPI_ISL_69438	A/chicken/Zhejiang/HF4/2009	Y280B	Y280B	TRUE
EPI_ISL_69436	A/chicken/Zhejiang/HF5/2009	Y280B	Y280B	TRUE
EPI_ISL_63471	A/chicken/Zhejiang/HJ/2007	Y280B	Y280B	TRUE
EPI_ISL_89738	A/chicken/Zhejiang/LAC/2011	Y280B	Y280B	TRUE
EPI_ISL_89651	A/chicken/Zhejiang/Q1D4/2010	Y280B	Y280B	TRUE
EPI_ISL_89653	A/chicken/Zhejiang/SJL/2009	Y280B	Y280B	TRUE
EPI_ISL_89711	A/chicken/Zhejiang/SYX/2010	Y280B	Y280B	TRUE
EPI_ISL_89737	A/chicken/Zhejiang/ZLB/2011	Y280B	Y280B	TRUE
EPI_ISL_7426	A/chukkar/Shantou/4635/2003	Y280B	Y280B	TRUE
EPI_ISL_7445	A/chukkar/Shantou/5866/2004	Y280B	Y280B	TRUE
EPI_ISL_9789	A/Ck/HK/NT142/2003	Y280B	Y280B	TRUE
EPI_ISL_9790	A/Ck/HK/WF126/2003	Y280B	Y280B	TRUE
EPI_ISL_9792	A/Ck/HK/YU463/2003	Y280B	Y280B	TRUE
EPI_ISL_97648	A/duck/Anhui/B24/2010	Y280B	Y280B	TRUE
EPI_ISL_97763	A/duck/Anhui/F26/2011	Y280B	Y280B	TRUE
EPI_ISL_84318	A/duck/Beijing/31/2005	Y280B	Y280B	TRUE
EPI_ISL_84334	A/duck/Beijing/MG0617/2005	Y280B	Y280B	TRUE
EPI_ISL_83491	A/duck/Fujian/FQ107/2007	Y280B	Y280B	TRUE
EPI_ISL_100152	A/duck/Fujian/FQ2/2007	Y280B	Y280B	TRUE
EPI_ISL_69400	A/duck/Fujian/T14/2007	Y280B	Y280B	TRUE
EPI_ISL_69399	A/duck/Fujian/T7/2007	Y280B	Y280B	TRUE
EPI_ISL_69420	A/duck/Guangdong/810/2009	Y280B	Y280B	TRUE
EPI_ISL_97604	A/duck/Guangdong/G24/2010	Y280B	Y280B	TRUE
EPI_ISL_84539	A/duck/Honghe/111/2009	Y280B	Y280B	TRUE
EPI_ISL_97526	A/duck/Hubei/F1/2010	Y280B	Y280B	TRUE
EPI_ISL_8922	A/duck/Nanchang/4-361/2001	Y280B	Y280B	TRUE
EPI_ISL_7406	A/duck/Shantou/12560/2005	Y280B	Y280B	TRUE
EPI_ISL_2297	A/duck/Shantou/2143/00	Y280B	Y280B	TRUE
EPI_ISL_2295	A/duck/Shantou/2144/00	Y280B	Y280B	TRUE
EPI_ISL_7397	A/duck/Shantou/3460/2003	Y280B	Y280B	TRUE
EPI_ISL_7390	A/duck/Shantou/3549/2001	Y280B	Y280B	TRUE
EPI_ISL_7395	A/duck/Shantou/4103/2002	Y280B	Y280B	TRUE
EPI_ISL_7396	A/duck/Shantou/4359/2002	Y280B	Y280B	TRUE
EPI_ISL_7391	A/duck/Shantou/5401/2001	Y280B	Y280B	TRUE
EPI_ISL_7393	A/duck/Shantou/5753/2001	Y280B	Y280B	TRUE
EPI_ISL_34047	A/duck/Zhejiang/3/2002	Y280B	Y280B	TRUE
EPI_ISL_70187	A/environment/Hunan/1-18/2007	Y280B	Y280B	TRUE
EPI_ISL_70190	A/environment/Hunan/1-81/2007	Y280B	Y280B	TRUE
EPI_ISL_70191	A/environment/Hunan/2-84/2007	Y280B	Y280B	TRUE
EPI_ISL_70192	A/environment/Hunan/5-38/2007	Y280B	Y280B	TRUE
EPI_ISL_70193	A/feces/Hunan/2-28/2007	Y280B	Y280B	TRUE
EPI_ISL_70194	A/feces/Hunan/3-91/2007	Y280B	Y280B	TRUE
EPI_ISL_97759	A/goose/Jilin/K5/2011	Y280B	Y280B	TRUE
EPI_ISL_19166	A/goose/Yunnan/chuxiong07/07	Y280B	Y280B	TRUE
EPI_ISL_7444	A/Guinea_fowl/Shantou/5852/2004	Y280B	Y280B	TRUE
EPI_ISL_7465	A/Guinea_fowl/Shantou/8955/2005	Y280B	Y280B	TRUE
EPI_ISL_4457	A/guineafowl/HongKong/NT101/03	Y280B	Y280B	TRUE
EPI_ISL_69735	A/Hong_Kong/3239/2008	Y280B	Y280B	TRUE
EPI_ISL_7482	A/partridge/Shantou/2617/2001	Y280B	Y280B	TRUE
EPI_ISL_7413	A/partridge/Shantou/2803/2003	Y280B	Y280B	TRUE
EPI_ISL_7299	A/partridge/Shantou/3720/2001	Y280B	Y280B	TRUE
EPI_ISL_7408	A/partridge/Shantou/4525/2002	Y280B	Y280B	TRUE
EPI_ISL_7332	A/partridge/Shantou/49/2002	Y280B	Y280B	TRUE
EPI_ISL_7449	A/partridge/Shantou/5692/2000	Y280B	Y280B	TRUE
EPI_ISL_7460	A/partridge/Shantou/645/2001	Y280B	Y280B	TRUE
EPI_ISL_7455	A/partridge/Shantou/7075/2004	Y280B	Y280B	TRUE
EPI_ISL_4464	A/pheasant/HongKong/WF54/03	Y280B	Y280B	TRUE
EPI_ISL_7462	A/pheasant/Shantou/111/2005	Y280B	Y280B	TRUE
EPI_ISL_7417	A/pheasant/Shantou/3716/2003	Y280B	Y280B	TRUE
EPI_ISL_7423	A/pheasant/Shantou/4340/2003	Y280B	Y280B	TRUE
EPI_ISL_7431	A/pheasant/Shantou/45/2004	Y280B	Y280B	TRUE
EPI_ISL_7452	A/pheasant/Shantou/6607/2004	Y280B	Y280B	TRUE
EPI_ISL_2244	A/quail/Shanghai/8/96	Y280B	Y280B	TRUE
EPI_ISL_11278	A/quail/Shantou/1158/2001	Y280B	Y280B	TRUE
EPI_ISL_11273	A/quail/Shantou/1820/2000	Y280B	Y280B	TRUE
EPI_ISL_11309	A/quail/Shantou/2615/2003	Y280B	Y280B	TRUE
EPI_ISL_11312	A/quail/Shantou/3502/2003	Y280B	Y280B	TRUE
EPI_ISL_11315	A/quail/Shantou/3856/2003	Y280B	Y280B	TRUE
EPI_ISL_11316	A/quail/Shantou/4038/2003	Y280B	Y280B	TRUE
EPI_ISL_11331	A/quail/Shantou/493/2005	Y280B	Y280B	TRUE
EPI_ISL_11334	A/quail/Shantou/5011/2005	Y280B	Y280B	TRUE
EPI_ISL_11291	A/quail/Shantou/5675/2001	Y280B	Y280B	TRUE
EPI_ISL_11325	A/quail/Shantou/6046/2004	Y280B	Y280B	TRUE
EPI_ISL_11326	A/quail/Shantou/6648/2004	Y280B	Y280B	TRUE
EPI_ISL_11327	A/quail/Shantou/6794/2004	Y280B	Y280B	TRUE
EPI_ISL_11328	A/quail/Shantou/7397/2004	Y280B	Y280B	TRUE
EPI_ISL_11296	A/quail/Shantou/786/2002	Y280B	Y280B	TRUE
EPI_ISL_11277	A/quail/Shantou/850/2001	Y280B	Y280B	TRUE
EPI_ISL_11335	A/quail/Shantou/8993/2005	Y280B	Y280B	TRUE
EPI_ISL_9791	A/SCk/HK/WF285/2003	Y280B	Y280B	TRUE
EPI_ISL_9794	A/SCk/HK/YU663/2003	Y280B	Y280B	TRUE
EPI_ISL_7330	A/silky_chicken/Shantou/1169/2005	Y280B	Y280B	TRUE
EPI_ISL_7478	A/silky_chicken/Shantou/1818/2000	Y280B	Y280B	TRUE
EPI_ISL_7314	A/silky_chicken/Shantou/1826/2004	Y280B	Y280B	TRUE
EPI_ISL_7331	A/silky_chicken/Shantou/2131/2005	Y280B	Y280B	TRUE
EPI_ISL_7486	A/silky_chicken/Shantou/2619/2001	Y280B	Y280B	TRUE
EPI_ISL_7329	A/silky_chicken/Shantou/459/2005	Y280B	Y280B	TRUE
EPI_ISL_7322	A/silky_chicken/Shantou/6020/2004	Y280B	Y280B	TRUE
EPI_ISL_7326	A/silky_chicken/Shantou/7790/2004	Y280B	Y280B	TRUE
EPI_ISL_70611	A/sparrow/Guangxi/31/2006	Y280B	Y280B	TRUE
EPI_ISL_70612	A/sparrow/Guangxi/47/2006	Y280B	Y280B	TRUE
EPI_ISL_65625	A/swine/Guangdong/wxl/2004	Y280B	Y280B	TRUE
EPI_ISL_81611	A/swine/Guangxi/10/2007	Y280B	Y280B	TRUE
EPI_ISL_81608	A/swine/Guangxi/7/2007	Y280B	Y280B	TRUE
EPI_ISL_81609	A/swine/Guangxi/8/2007	Y280B	Y280B	TRUE
EPI_ISL_81610	A/swine/Guangxi/9/2007	Y280B	Y280B	TRUE
EPI_ISL_10593	A/swine/Henan/2/2004	Y280B	Y280B	TRUE
EPI_ISL_10589	A/swine/Henan/7/2004	Y280B	Y280B	TRUE
EPI_ISL_10591	A/swine/Henan/8/2004	Y280B	Y280B	TRUE
EPI_ISL_15584	A/swine/Jiangxi/wx2/2004	Y280B	Y280B	TRUE

## Sheet: H9 Redundant Dataset
Accession	Strain	Subtype	Source
EPI_ISL_62976	A/avian/Israel/313/2008	H9N2	GISAID
EPI_ISL_62977	A/avian/Israel/314/2008	H9N2	GISAID
EPI_ISL_19625	A/avian/Israel/584/2005	H9N2	GISAID
EPI_ISL_80921	A/avian/Saudi_Arabia/910134/2006	H9N2	GISAID
EPI_ISL_80922	A/avian/Saudi_Arabia/910135/2006	H9N2	GISAID
EPI_ISL_80923	A/avian/Saudi_Arabia/910136/2006	H9N2	GISAID
EPI_ISL_94964	A/bar-tailed_godwit/Stockton/11204/2008	H9	GISAID
EPI_ISL_30817	A/Bewicks_swan/Netherlands/5/2007	H9N2	GISAID
EPI_ISL_13014	A/bird/Guangxi/62/2005	H9N2	GISAID
EPI_ISL_13015	A/bird/Guangxi/63/2005	H9N2	GISAID
EPI_ISL_13016	A/bird/Guangxi/82/2005	H9N2	GISAID
EPI_ISL_13017	A/bird/Guangxi/83/2005	H9N2	GISAID
EPI_ISL_13019	A/bird/Guangxi/A1/2006	H9N2	GISAID
EPI_ISL_13021	A/bird/Guangxi/H1/2006	H9N2	GISAID
EPI_ISL_94965	A/black_swan/Morpeth/194/2008	H9	GISAID
EPI_ISL_98372	A/black-billed_magpie/Guangxi/29/2005	H9N2	GISAID
EPI_ISL_98371	A/black-billed_magpie/Guangxi/30/2005	H9N2	GISAID
EPI_ISL_98370	A/black-billed_magpie/Guangxi/31/2005	H9N2	GISAID
EPI_ISL_93624	A/canine/Guangxi/1/2011/H9N2	H9N2	GISAID
EPI_ISL_63781	A/chicken/Afghanistan/329-2vir09-AFG-Khost1/2008	H9N2	GISAID
EPI_ISL_63782	A/chicken/Afghanistan/329-3vir09-AFG-Khost2/2008	H9N2	GISAID
EPI_ISL_63783	A/chicken/Afghanistan/329-4vir09-AFG-Khost3/2008	H9N2	GISAID
EPI_ISL_63784	A/chicken/Afghanistan/329-5vir09-AFG-Khost4/2008	H9N2	GISAID
EPI_ISL_63785	A/chicken/Afghanistan/329-6vir09-AFG-Khost9/2008	H9N2	GISAID
EPI_ISL_63786	A/chicken/Afghanistan/329-7vir09-AFG-Heart6/2009	H9N2	GISAID
EPI_ISL_63787	A/chicken/Afghanistan/329-8vir09-AFG-Heart7/2009	H9N2	GISAID
EPI_ISL_68588	A/chicken/Anhui/1/1998	H9N2	GISAID
EPI_ISL_2153	A/chicken/Anhui/1/98	H9N2	GISAID
EPI_ISL_67715	A/chicken/Anhui/2/2002	H9N2	GISAID
EPI_ISL_84317	A/chicken/Anhui/2h/2002	H9N2	GISAID
EPI_ISL_98117	A/chicken/Anhui/A12/2011	H9N2	GISAID
EPI_ISL_98114	A/chicken/Anhui/A17/2011	H9N2	GISAID
EPI_ISL_97594	A/chicken/Anhui/A19/2010	H9N2	GISAID
EPI_ISL_97593	A/chicken/Anhui/A20/2010	H9N2	GISAID
EPI_ISL_97757	A/chicken/Anhui/A21-2/2011	H9N2	GISAID
EPI_ISL_97592	A/chicken/Anhui/A25/2010	H9N2	GISAID
EPI_ISL_98110	A/chicken/Anhui/A25/2011	H9N2	GISAID
EPI_ISL_98107	A/chicken/Anhui/A28/2011	H9N2	GISAID
EPI_ISL_98105	A/chicken/Anhui/A3/2011	H9N2	GISAID
EPI_ISL_98101	A/chicken/Anhui/A9/2011	H9N2	GISAID
EPI_ISL_29161	A/chicken/Anhui/AH16/2008	H9N2	GISAID
EPI_ISL_29162	A/chicken/Anhui/AH23/2008	H9N2	GISAID
EPI_ISL_29163	A/chicken/Anhui/AI16/2008	H9N2	GISAID
EPI_ISL_29164	A/chicken/Anhui/AK13/2008	H9N2	GISAID
EPI_ISL_29165	A/chicken/Anhui/AK25/2008	H9N2	GISAID
EPI_ISL_97590	A/chicken/Anhui/B17-2/2010	H9N2	GISAID
EPI_ISL_97651	A/chicken/Anhui/B18/2010	H9N2	GISAID
EPI_ISL_97754	A/chicken/Anhui/B19/2011	H9N2	GISAID
EPI_ISL_97656	A/chicken/Anhui/B2/2010	H9N2	GISAID
EPI_ISL_97650	A/chicken/Anhui/B20/2010	H9N2	GISAID
EPI_ISL_97753	A/chicken/Anhui/B20/2011	H9N2	GISAID
EPI_ISL_97751	A/chicken/Anhui/B24/2011	H9N2	GISAID
EPI_ISL_97756	A/chicken/Anhui/B6/2011	H9N2	GISAID
EPI_ISL_97654	A/chicken/Anhui/B7/2010	H9N2	GISAID
EPI_ISL_97755	A/chicken/Anhui/B7/2011	H9N2	GISAID
EPI_ISL_98100	A/chicken/Anhui/D14/2011	H9N2	GISAID
EPI_ISL_97587	A/chicken/Anhui/D19/2010	H9N2	GISAID
EPI_ISL_97586	A/chicken/Anhui/D21/2010	H9N2	GISAID
EPI_ISL_97747	A/chicken/Anhui/D21/2011	H9N2	GISAID
EPI_ISL_97584	A/chicken/Anhui/D25/2010	H9N2	GISAID
EPI_ISL_97750	A/chicken/Anhui/D3/2011	H9N2	GISAID
EPI_ISL_98099	A/chicken/Anhui/D30/2011	H9N2	GISAID
EPI_ISL_98098	A/chicken/Anhui/E13/2011	H9N2	GISAID
EPI_ISL_97745	A/chicken/Anhui/E15/2011	H9N2	GISAID
EPI_ISL_98095	A/chicken/Anhui/E19/2011	H9N2	GISAID
EPI_ISL_98093	A/chicken/Anhui/E22/2011	H9N2	GISAID
EPI_ISL_97743	A/chicken/Anhui/E23-2/2011	H9N2	GISAID
EPI_ISL_98089	A/chicken/Anhui/E26/2011	H9N2	GISAID
EPI_ISL_98087	A/chicken/Anhui/E29/2011	H9N2	GISAID
EPI_ISL_98081	A/chicken/Anhui/E9/2011	H9N2	GISAID
EPI_ISL_97738	A/chicken/Anhui/F31/2011	H9N2	GISAID
EPI_ISL_97644	A/chicken/Anhui/G12/2010	H9N2	GISAID
EPI_ISL_97643	A/chicken/Anhui/G14/2010	H9N2	GISAID
EPI_ISL_97642	A/chicken/Anhui/G15/2010	H9N2	GISAID
EPI_ISL_97641	A/chicken/Anhui/G16/2010	H9N2	GISAID
EPI_ISL_97639	A/chicken/Anhui/G18/2010	H9N2	GISAID
EPI_ISL_97734	A/chicken/Anhui/G18/2011	H9N2	GISAID
EPI_ISL_62988	A/chicken/Anhui/G20/2008	H9N2	GISAID
EPI_ISL_62989	A/chicken/Anhui/G24/2008	H9N2	GISAID
EPI_ISL_97733	A/chicken/Anhui/G25/2011	H9N2	GISAID
EPI_ISL_62990	A/chicken/Anhui/G6/2008	H9N2	GISAID
EPI_ISL_97737	A/chicken/Anhui/G6/2011	H9N2	GISAID
EPI_ISL_89714	A/chicken/Anhui/GQY/2011	H9N2	GISAID
EPI_ISL_98079	A/chicken/Anhui/I12/2011	H9N2	GISAID
EPI_ISL_98078	A/chicken/Anhui/I13/2011	H9N2	GISAID
EPI_ISL_98069	A/chicken/Anhui/I24/2011	H9N2	GISAID
EPI_ISL_98064	A/chicken/Anhui/I4/2011	H9N2	GISAID
EPI_ISL_98062	A/chicken/Anhui/I8/2011	H9N2	GISAID
EPI_ISL_62991	A/chicken/Anhui/J13/2008	H9N2	GISAID
EPI_ISL_97726	A/chicken/Anhui/J19/2011	H9N2	GISAID
EPI_ISL_62993	A/chicken/Anhui/J2/2008	H9N2	GISAID
EPI_ISL_62995	A/chicken/Anhui/J22/2008	H9N2	GISAID
EPI_ISL_62997	A/chicken/Anhui/J7/2008	H9N2	GISAID
EPI_ISL_98056	A/chicken/Anhui/K13/2011	H9N2	GISAID
EPI_ISL_97720	A/chicken/Anhui/K17/2011	H9N2	GISAID
EPI_ISL_97725	A/chicken/Anhui/K3-2/2011	H9N2	GISAID
EPI_ISL_97711	A/chicken/Anhui/M10/2011	H9N2	GISAID
EPI_ISL_97710	A/chicken/Anhui/M13/2011	H9N2	GISAID
EPI_ISL_97709	A/chicken/Anhui/M18/2011	H9N2	GISAID
EPI_ISL_97717	A/chicken/Anhui/M2/2011	H9N2	GISAID
EPI_ISL_97708	A/chicken/Anhui/M25/2011	H9N2	GISAID
EPI_ISL_97715	A/chicken/Anhui/M5/2011	H9N2	GISAID
EPI_ISL_97713	A/chicken/Anhui/M8/2011	H9N2	GISAID
EPI_ISL_89710	A/chicken/Anhui/WANG/2010	H9N2	GISAID
EPI_ISL_89736	A/chicken/Anhui/WBQ/2011	H9N2	GISAID
EPI_ISL_89750	A/chicken/Anhui/XMS/2011	H9N2	GISAID
EPI_ISL_89715	A/chicken/Anhui/ZTL/2011	H9N2	GISAID
EPI_ISL_99613	A/chicken/Anhui/ZYX05/2011	H9N2	GISAID
EPI_ISL_84536	A/chicken/Baoshan/111/2009	H9N2	GISAID
EPI_ISL_84544	A/chicken/Baoshan/711/2008	H9N2	GISAID
EPI_ISL_3446	A/chicken/Beijing/1/00	H9N2	GISAID
EPI_ISL_84333	A/chicken/Beijing/1/2006	H9N2	GISAID
EPI_ISL_1270	A/chicken/Beijing/1/94	H9N2	GISAID
EPI_ISL_2439	A/chicken/Beijing/1/95	H9N2	GISAID
EPI_ISL_2170	A/chicken/Beijing/1/97	H9N2	GISAID
EPI_ISL_74000	A/chicken/Beijing/19/2003	H9N2	GISAID
EPI_ISL_2440	A/chicken/Beijing/2/97	H9N2	GISAID
EPI_ISL_24706	A/chicken/Beijing/3/2001	H9N2	GISAID
EPI_ISL_2441	A/chicken/Beijing/3/99	H9N2	GISAID
EPI_ISL_84332	A/chicken/Beijing/7/2005	H9N2	GISAID
EPI_ISL_2232	A/chicken/Beijing/8/98	H9N2	GISAID
EPI_ISL_4042	A/chicken/Beijing/9/98	H9N2	GISAID
EPI_ISL_13996	A/chicken/Beijing/L1/2005	H9N2	GISAID
EPI_ISL_68494	A/chicken/Beijing/ne/1999	H9N2	GISAID
EPI_ISL_67717	A/chicken/Beijing/nl/2002	H9N2	GISAID
EPI_ISL_9494	A/chicken/Beit-Aran/29/05	H9N2	GISAID
EPI_ISL_78703	A/chicken/Chandigarh/2048/2003	H9N2	GISAID
EPI_ISL_10141	A/chicken/Cheongju/ADL0401/2004	H9N2	GISAID
EPI_ISL_69854	A/chicken/China	H9N2	GISAID
EPI_ISL_2851	A/chicken/China/AG518/2001	H9N2	GISAID
EPI_ISL_90154	A/chicken/China/AH-10-01/2010	H9N2	GISAID
EPI_ISL_10168	A/chicken/China/Guangxi1/2000	H9N2	GISAID
EPI_ISL_10169	A/chicken/China/Guangxi14/2000	H9N2	GISAID
EPI_ISL_10170	A/chicken/China/Guangxi17/2000	H9N2	GISAID
EPI_ISL_97669	A/chicken/Chongqing/A56/2011	H9N2	GISAID
EPI_ISL_97660	A/chicken/Chongqing/D17/2011	H9N2	GISAID
EPI_ISL_98034	A/chicken/Chongqing/G10/2011	H9N2	GISAID
EPI_ISL_98032	A/chicken/Chongqing/G12/2011	H9N2	GISAID
EPI_ISL_98031	A/chicken/Chongqing/G14/2011	H9N2	GISAID
EPI_ISL_98029	A/chicken/Chongqing/G21/2011	H9N2	GISAID
EPI_ISL_98028	A/chicken/Chongqing/G23/2011	H9N2	GISAID
EPI_ISL_98027	A/chicken/Chongqing/G25/2011	H9N2	GISAID
EPI_ISL_98019	A/chicken/Chongqing/J23/2011	H9N2	GISAID
EPI_ISL_97662	A/chicken/Chongqing/K10/2011	H9N2	GISAID
EPI_ISL_97671	A/chicken/Chongqing/K16/2011	H9N2	GISAID
EPI_ISL_97663	A/chicken/Chongqing/K23/2011	H9N2	GISAID
EPI_ISL_97670	A/chicken/Chongqing/K3/2011	H9N2	GISAID
EPI_ISL_97668	A/chicken/Chongqing/K4/2011	H9N2	GISAID
EPI_ISL_97672	A/chicken/Chongqing/K7/2011	H9N2	GISAID
EPI_ISL_84540	A/chicken/Dehong/411/2009	H9N2	GISAID
EPI_ISL_85790	A/chicken/Dubai/09vir3771-3/2008	H9N2	GISAID
EPI_ISL_11172	A/chicken/Dubai/338/2001	H9N2	GISAID
EPI_ISL_11173	A/chicken/Dubai/339/2001	H9N2	GISAID
EPI_ISL_11174	A/chicken/Dubai/383/2002	H9N2	GISAID
EPI_ISL_11175	A/chicken/Dubai/463/2003	H9N2	GISAID
EPI_ISL_9488	A/chicken/Ein_Habsor/1808/04	H9N2	GISAID
EPI_ISL_83544	A/chicken/Emirates/R66/2002	H9N2	GISAID
EPI_ISL_7358	A/chicken/Fujian/10308/2005	H9N2	GISAID
EPI_ISL_7359	A/chicken/Fujian/10954/2005	H9N2	GISAID
EPI_ISL_73998	A/chicken/Fujian/11/2007	H9N2	GISAID
EPI_ISL_7360	A/chicken/Fujian/11302/2005	H9N2	GISAID
EPI_ISL_7361	A/chicken/Fujian/11488/2005	H9N2	GISAID
EPI_ISL_7362	A/chicken/Fujian/12252/2005	H9N2	GISAID
EPI_ISL_24717	A/chicken/Fujian/2/2002	H9N2	GISAID
EPI_ISL_8494	A/chicken/Fujian/25/00	H9N2	GISAID
EPI_ISL_7344	A/chicken/Fujian/3080/2005	H9N2	GISAID
EPI_ISL_7345	A/chicken/Fujian/4332/2005	H9N2	GISAID
EPI_ISL_7346	A/chicken/Fujian/4820/2005	H9N2	GISAID
EPI_ISL_7347	A/chicken/Fujian/5214/2005	H9N2	GISAID
EPI_ISL_7348	A/chicken/Fujian/5683/2005	H9N2	GISAID
EPI_ISL_7349	A/chicken/Fujian/6188/2005	H9N2	GISAID
EPI_ISL_7350	A/chicken/Fujian/6960/2005	H9N2	GISAID
EPI_ISL_7351	A/chicken/Fujian/7386/2005	H9N2	GISAID
EPI_ISL_7352	A/chicken/Fujian/7884/2005	H9N2	GISAID
EPI_ISL_7355	A/chicken/Fujian/9104/2005	H9N2	GISAID
EPI_ISL_7356	A/chicken/Fujian/9290/2005	H9N2	GISAID
EPI_ISL_7357	A/chicken/Fujian/9752/2005	H9N2	GISAID
EPI_ISL_29156	A/chicken/Fujian/FB21/2007	H9N2	GISAID
EPI_ISL_29155	A/chicken/Fujian/FB22/2007	H9N2	GISAID
EPI_ISL_29157	A/chicken/Fujian/FB3/2007	H9N2	GISAID
EPI_ISL_29154	A/chicken/Fujian/FG13/2007	H9N2	GISAID
EPI_ISL_29153	A/chicken/Fujian/FG14/2007	H9N2	GISAID
EPI_ISL_29151	A/chicken/Fujian/FH14/2007	H9N2	GISAID
EPI_ISL_29152	A/chicken/Fujian/FH7/2007	H9N2	GISAID
EPI_ISL_89652	A/chicken/Fujian/G9/2009	H9N2	GISAID
EPI_ISL_99614	A/chicken/Fujian/HJF04/2011	H9N2	GISAID
EPI_ISL_89733	A/chicken/Fujian/SL4/2011	H9N2	GISAID
EPI_ISL_89749	A/chicken/Fujian/SL6/2011	H9N2	GISAID
EPI_ISL_2155	A/chicken/Gangxi/1/00	H9N2	GISAID
EPI_ISL_2156	A/chicken/Gangxi/2/00	H9N2	GISAID
EPI_ISL_2154	A/chicken/Gansu/1/99	H9N2	GISAID
EPI_ISL_11187	A/chicken/Gansu/2/99	H9N2	GISAID
EPI_ISL_1493	A/chicken/Germany/R45/98	H9N2	GISAID
EPI_ISL_24917	A/chicken/Guangdong/02/2007	H9N2	GISAID
EPI_ISL_24718	A/chicken/Guangdong/1/2002	H9N2	GISAID
EPI_ISL_2233	A/chicken/Guangdong/10/00	H9N2	GISAID
EPI_ISL_24720	A/chicken/Guangdong/10/2001	H9N2	GISAID
EPI_ISL_24707	A/chicken/Guangdong/11/1999	H9N2	GISAID
EPI_ISL_2234	A/chicken/Guangdong/11/97	H9N2	GISAID
EPI_ISL_19570	A/chicken/Guangdong/126/2002	H9N2	GISAID
EPI_ISL_24721	A/chicken/Guangdong/16/1999	H9N2	GISAID
EPI_ISL_74003	A/chicken/Guangdong/16/2003	H9N2	GISAID
EPI_ISL_24719	A/chicken/Guangdong/2/2000	H9N2	GISAID
EPI_ISL_8495	A/chicken/Guangdong/21/02	H9N2	GISAID
EPI_ISL_24722	A/chicken/Guangdong/22/2001	H9N2	GISAID
EPI_ISL_97658	A/chicken/Guangdong/265/2011	H9N2	GISAID
EPI_ISL_97659	A/chicken/Guangdong/283/2011	H9N2	GISAID
EPI_ISL_97657	A/chicken/Guangdong/286/2011	H9N2	GISAID
EPI_ISL_8496	A/chicken/Guangdong/4/00	H9N2	GISAID
EPI_ISL_8497	A/chicken/Guangdong/47/01	H9N2	GISAID
EPI_ISL_8498	A/chicken/Guangdong/5/97	H9N2	GISAID
EPI_ISL_8499	A/chicken/Guangdong/56/01	H9N2	GISAID
EPI_ISL_8500	A/chicken/Guangdong/6/97	H9N2	GISAID
EPI_ISL_68684	A/chicken/Guangdong/97_	H9N2	GISAID
EPI_ISL_69427	A/chicken/Guangdong/A10/2007	H9N2	GISAID
EPI_ISL_69425	A/chicken/Guangdong/A3/2003	H9N2	GISAID
EPI_ISL_69429	A/chicken/Guangdong/A4/2003	H9N2	GISAID
EPI_ISL_69426	A/chicken/Guangdong/A5/2003	H9N2	GISAID
EPI_ISL_69421	A/chicken/Guangdong/A6/2003	H9N2	GISAID
EPI_ISL_69415	A/chicken/Guangdong/A7/2002	H9N2	GISAID
EPI_ISL_98259	A/chicken/Guangdong/B106/2009	H9N2	GISAID
EPI_ISL_98326	A/chicken/Guangdong/B15/2009	H9N2	GISAID
EPI_ISL_98302	A/chicken/Guangdong/B16/2009	H9N2	GISAID
EPI_ISL_69428	A/chicken/Guangdong/B2/2006	H9N2	GISAID
EPI_ISL_69416	A/chicken/Guangdong/B4/2006	H9N2	GISAID
EPI_ISL_69418	A/chicken/Guangdong/B5/2002	H9N2	GISAID
EPI_ISL_69422	A/chicken/Guangdong/B6/2005	H9N2	GISAID
EPI_ISL_69419	A/chicken/Guangdong/B7/2003	H9N2	GISAID
EPI_ISL_98224	A/chicken/Guangdong/B7/2009	H9N2	GISAID
EPI_ISL_98244	A/chicken/Guangdong/B87/2009	H9N2	GISAID
EPI_ISL_69417	A/chicken/Guangdong/B9/2002	H9N2	GISAID
EPI_ISL_89735	A/chicken/Guangdong/CJZ/2011	H9N2	GISAID
EPI_ISL_97515	A/chicken/Guangdong/D2/2010	H9N2	GISAID
EPI_ISL_97514	A/chicken/Guangdong/D4/2010	H9N2	GISAID
EPI_ISL_97513	A/chicken/Guangdong/D7/2010	H9N2	GISAID
EPI_ISL_97512	A/chicken/Guangdong/D8/2010	H9N2	GISAID
EPI_ISL_97511	A/chicken/Guangdong/D9/2010	H9N2	GISAID
EPI_ISL_99619	A/chicken/Guangdong/DJN03/2011	H9N2	GISAID
EPI_ISL_69409	A/chicken/Guangdong/E23/2008	H9N2	GISAID
EPI_ISL_69410	A/chicken/Guangdong/E24/2008	H9N2	GISAID
EPI_ISL_69411	A/chicken/Guangdong/E25/2008	H9N2	GISAID
EPI_ISL_99612	A/chicken/Guangdong/FJC07/2011	H9N2	GISAID
EPI_ISL_89745	A/chicken/Guangdong/FLS/2011	H9N2	GISAID
EPI_ISL_89721	A/chicken/Guangdong/FZH/2011	H9N2	GISAID
EPI_ISL_69430	A/chicken/Guangdong/G7/2009	H9N2	GISAID
EPI_ISL_23098	A/chicken/Guangdong/GZ02/2008	H9N2	GISAID
EPI_ISL_97510	A/chicken/Guangdong/H11/2010	H9N2	GISAID
EPI_ISL_97509	A/chicken/Guangdong/H12/2010	H9N2	GISAID
EPI_ISL_97508	A/chicken/Guangdong/H28/2010	H9N2	GISAID
EPI_ISL_97507	A/chicken/Guangdong/H29/2010	H9N2	GISAID
EPI_ISL_89748	A/chicken/Guangdong/HBQ/2011	H9N2	GISAID
EPI_ISL_69412	A/chicken/Guangdong/HE10/2009	H9N2	GISAID
EPI_ISL_69424	A/chicken/Guangdong/HE12/2008	H9N2	GISAID
EPI_ISL_69423	A/chicken/Guangdong/HE20/2008	H9N2	GISAID
EPI_ISL_69413	A/chicken/Guangdong/HE21/2008	H9N2	GISAID
EPI_ISL_69414	A/chicken/Guangdong/HE22/2008	H9N2	GISAID
EPI_ISL_99607	A/chicken/Guangdong/HMZ11/2011	H9N2	GISAID
EPI_ISL_89747	A/chicken/Guangdong/HXK/2011	H9N2	GISAID
EPI_ISL_89744	A/chicken/Guangdong/HYF/2011	H9N2	GISAID
EPI_ISL_98217	A/chicken/Guangdong/J22/2009	H9N2	GISAID
EPI_ISL_98315	A/chicken/Guangdong/J23/2009	H9N2	GISAID
EPI_ISL_98311	A/chicken/Guangdong/J3/2009	H9N2	GISAID
EPI_ISL_98314	A/chicken/Guangdong/J5/2009	H9N2	GISAID
EPI_ISL_98318	A/chicken/Guangdong/K2/2009	H9N2	GISAID
EPI_ISL_98308	A/chicken/Guangdong/K22/2009	H9N2	GISAID
EPI_ISL_98312	A/chicken/Guangdong/K23/2009	H9N2	GISAID
EPI_ISL_98321	A/chicken/Guangdong/K25/2009	H9N2	GISAID
EPI_ISL_98320	A/chicken/Guangdong/K3/2009	H9N2	GISAID
EPI_ISL_98301	A/chicken/Guangdong/K8/2009	H9N2	GISAID
EPI_ISL_83298	A/chicken/Guangdong/L14/2009	H9N2	GISAID
EPI_ISL_98310	A/chicken/Guangdong/L4/2009	H9N2	GISAID
EPI_ISL_89718	A/chicken/Guangdong/LHY/2011	H9N2	GISAID
EPI_ISL_89739	A/chicken/Guangdong/LJD/2011	H9N2	GISAID
EPI_ISL_89743	A/chicken/Guangdong/LJH/2011	H9N2	GISAID
EPI_ISL_99620	A/chicken/Guangdong/LJJ03/2011	H9N2	GISAID
EPI_ISL_89724	A/chicken/Guangdong/LMQ/2011	H9N2	GISAID
EPI_ISL_89717	A/chicken/Guangdong/LSD/2011	H9N2	GISAID
EPI_ISL_89712	A/chicken/Guangdong/LWQ/2010	H9N2	GISAID
EPI_ISL_89722	A/chicken/Guangdong/LYL/2011	H9N2	GISAID
EPI_ISL_89725	A/chicken/Guangdong/LYQ/2011	H9N2	GISAID
EPI_ISL_89746	A/chicken/Guangdong/LZQ/2011	H9N2	GISAID
EPI_ISL_89732	A/chicken/Guangdong/MYS/2011	H9N2	GISAID
EPI_ISL_98237	A/chicken/Guangdong/P11/2009	H9N2	GISAID
EPI_ISL_98219	A/chicken/Guangdong/P2/2009	H9N2	GISAID
EPI_ISL_98223	A/chicken/Guangdong/P20/2009	H9N2	GISAID
EPI_ISL_98327	A/chicken/Guangdong/P26/2009	H9N2	GISAID
EPI_ISL_98238	A/chicken/Guangdong/P27/2009	H9N2	GISAID
EPI_ISL_89648	A/chicken/Guangdong/Q6/2010	H9N2	GISAID
EPI_ISL_89719	A/chicken/Guangdong/QZL/2011	H9N2	GISAID
EPI_ISL_98298	A/chicken/Guangdong/R13/2009	H9N2	GISAID
EPI_ISL_98234	A/chicken/Guangdong/R17/2009	H9N2	GISAID
EPI_ISL_98300	A/chicken/Guangdong/R21/2009	H9N2	GISAID
EPI_ISL_98239	A/chicken/Guangdong/R23/2009	H9N2	GISAID
EPI_ISL_98240	A/chicken/Guangdong/R24/2009	H9N2	GISAID
EPI_ISL_89716	A/chicken/Guangdong/SK/2011	H9N2	GISAID
EPI_ISL_99608	A/chicken/Guangdong/SQL11/2011	H9N2	GISAID
EPI_ISL_68726	A/chicken/Guangdong/SS/94	H9N2	GISAID
EPI_ISL_89706	A/chicken/Guangdong/U4/2010	H9N2	GISAID
EPI_ISL_89705	A/chicken/Guangdong/U5/2010	H9N2	GISAID
EPI_ISL_98235	A/chicken/Guangdong/V11/2009	H9N2	GISAID
EPI_ISL_98216	A/chicken/Guangdong/V12/2009	H9N2	GISAID
EPI_ISL_98229	A/chicken/Guangdong/V13/2009	H9N2	GISAID
EPI_ISL_98242	A/chicken/Guangdong/V23/2009	H9N2	GISAID
EPI_ISL_89720	A/chicken/Guangdong/WGH/2011	H9N2	GISAID
EPI_ISL_83299	A/chicken/Guangdong/Y1/2009	H9N2	GISAID
EPI_ISL_98236	A/chicken/Guangdong/Y12/2009	H9N2	GISAID
EPI_ISL_98299	A/chicken/Guangdong/Y18/2009	H9N2	GISAID
EPI_ISL_98305	A/chicken/Guangdong/Y4/2009	H9N2	GISAID
EPI_ISL_98304	A/chicken/Guangdong/Y7/2009	H9N2	GISAID
EPI_ISL_98306	A/chicken/Guangdong/Y8/2009	H9N2	GISAID
EPI_ISL_89731	A/chicken/Guangdong/YJX/2011	H9N2	GISAID
EPI_ISL_98866	A/chicken/Guangdong/ZCY/2011	H9N2	GISAID
EPI_ISL_89713	A/chicken/Guangdong/ZDR/2010	H9N2	GISAID
EPI_ISL_98865	A/chicken/Guangdong/ZHJ/2011	H9N2	GISAID
EPI_ISL_89728	A/chicken/Guangdong/ZPY/2011	H9N2	GISAID
EPI_ISL_83297	A/chicken/Guangdongg/G9/2009	H9N2	GISAID
EPI_ISL_8501	A/chicken/Guangxi/10/99	H9N2	GISAID
EPI_ISL_70608	A/chicken/Guangxi/101/2006	H9N2	GISAID
EPI_ISL_7368	A/chicken/Guangxi/1032/2005	H9N2	GISAID
EPI_ISL_7369	A/chicken/Guangxi/1428/2005	H9N2	GISAID
EPI_ISL_70604	A/chicken/Guangxi/17/2007	H9N2	GISAID
EPI_ISL_65219	A/chicken/Guangxi/1857/2004	H9N2	GISAID
EPI_ISL_7366	A/chicken/Guangxi/187/2005	H9N2	GISAID
EPI_ISL_70605	A/chicken/Guangxi/21/2006	H9N2	GISAID
EPI_ISL_7370	A/chicken/Guangxi/2389/2005	H9N2	GISAID
EPI_ISL_65220	A/chicken/Guangxi/2441/2004	H9N2	GISAID
EPI_ISL_13010	A/chicken/Guangxi/37/2005	H9N2	GISAID
EPI_ISL_70606	A/chicken/Guangxi/39/2007	H9N2	GISAID
EPI_ISL_13005	A/chicken/Guangxi/4/1999	H9N2	GISAID
EPI_ISL_70607	A/chicken/Guangxi/44/2006	H9N2	GISAID
EPI_ISL_7371	A/chicken/Guangxi/4745/2005	H9N2	GISAID
EPI_ISL_7367	A/chicken/Guangxi/521/2005	H9N2	GISAID
EPI_ISL_13013	A/chicken/Guangxi/55/2005	H9N2	GISAID
EPI_ISL_13012	A/chicken/Guangxi/6/2000	H9N2	GISAID
EPI_ISL_8502	A/chicken/Guangxi/9/99	H9N2	GISAID
EPI_ISL_69407	A/chicken/Guangxi/G8/2009	H9N2	GISAID
EPI_ISL_68562	A/chicken/Guangxi/KMI/99	H9N2	GISAID
EPI_ISL_78799	A/chicken/Guangxi/KMIII/1999	H9N2	GISAID
EPI_ISL_99615	A/chicken/Guangxi/LRW04/2011	H9N2	GISAID
EPI_ISL_89742	A/chicken/Guangxi/MFX/2011	H9N2	GISAID
EPI_ISL_99609	A/chicken/Guangxi/QCR10/2011	H9N2	GISAID
EPI_ISL_89741	A/chicken/Guangxi/WSL/2011	H9N2	GISAID
EPI_ISL_77226	A/chicken/Guangzhou/GZ/2005	H9N2	GISAID
EPI_ISL_97582	A/chicken/Guizhou/A4/2010	H9N2	GISAID
EPI_ISL_98014	A/chicken/Guizhou/B11/2011	H9N2	GISAID
EPI_ISL_97704	A/chicken/Guizhou/B26/2011	H9N2	GISAID
EPI_ISL_97579	A/chicken/Guizhou/D15/2010	H9N2	GISAID
EPI_ISL_83288	A/chicken/Guizhou/D26/2009	H9N2	GISAID
EPI_ISL_97703	A/chicken/Guizhou/D26/2011	H9N2	GISAID
EPI_ISL_98012	A/chicken/Guizhou/E11/2011	H9N2	GISAID
EPI_ISL_97573	A/chicken/Guizhou/E15/2010	H9N2	GISAID
EPI_ISL_97572	A/chicken/Guizhou/E23/2010	H9N2	GISAID
EPI_ISL_97571	A/chicken/Guizhou/E25/2010	H9N2	GISAID
EPI_ISL_97570	A/chicken/Guizhou/E29/2010	H9N2	GISAID
EPI_ISL_97577	A/chicken/Guizhou/E3/2010	H9N2	GISAID
EPI_ISL_97575	A/chicken/Guizhou/E9/2010	H9N2	GISAID
EPI_ISL_98011	A/chicken/Guizhou/G12/2011	H9N2	GISAID
EPI_ISL_97702	A/chicken/Guizhou/G12-2/2011	H9N2	GISAID
EPI_ISL_98010	A/chicken/Guizhou/G17/2011	H9N2	GISAID
EPI_ISL_98009	A/chicken/Guizhou/G22/2011	H9N2	GISAID
EPI_ISL_98008	A/chicken/Guizhou/G23/2011	H9N2	GISAID
EPI_ISL_98007	A/chicken/Guizhou/H24/2011	H9N2	GISAID
EPI_ISL_99610	A/chicken/Guizhou/HCF09/2011	H9N2	GISAID
EPI_ISL_97701	A/chicken/Guizhou/J22/2011	H9N2	GISAID
EPI_ISL_99611	A/chicken/Guizhou/LCY09/2011	H9N2	GISAID
EPI_ISL_83290	A/chicken/Guizhou/Q16/2009	H9N2	GISAID
EPI_ISL_83289	A/chicken/Guizhou/Q6/2009	H9N2	GISAID
EPI_ISL_99616	A/chicken/Guizhou/XK04/2011	H9N2	GISAID
EPI_ISL_78704	A/chicken/Gujarat/3697/2004	H9N2	GISAID
EPI_ISL_27603	A/chicken/Gujarat/3724/2004	H9N2	GISAID
EPI_ISL_98006	A/chicken/Hainan/A13/2011	H9N2	GISAID
EPI_ISL_98005	A/chicken/Hainan/A26/2011	H9N2	GISAID
EPI_ISL_98004	A/chicken/Hainan/A4/2011	H9N2	GISAID
EPI_ISL_98000	A/chicken/Hainan/I22/2011	H9N2	GISAID
EPI_ISL_97999	A/chicken/Hainan/I28/2011	H9N2	GISAID
EPI_ISL_97998	A/chicken/Hainan/I7/2011	H9N2	GISAID
EPI_ISL_97997	A/chicken/Hainan/J13/2011	H9N2	GISAID
EPI_ISL_97995	A/chicken/Hainan/J19/2011	H9N2	GISAID
EPI_ISL_97992	A/chicken/Hainan/J3/2011	H9N2	GISAID
EPI_ISL_97989	A/chicken/Hainan/J5/2011	H9N2	GISAID
EPI_ISL_97988	A/chicken/Hainan/J6/2011	H9N2	GISAID
EPI_ISL_89649	A/chicken/Hainan/Q4/2010	H9N2	GISAID
EPI_ISL_27600	A/chicken/Haryana/2051/2003	H9N2	GISAID
EPI_ISL_78705	A/chicken/Haryana/2424/2004	H9N2	GISAID
EPI_ISL_84330	A/chicken/Hebei/0329/2007	H9N2	GISAID
EPI_ISL_84329	A/chicken/Hebei/0617/2007	H9N2	GISAID
EPI_ISL_84328	A/chicken/Hebei/0822/2007	H9N2	GISAID
EPI_ISL_2157	A/chicken/Hebei/1/00	H9N2	GISAID
EPI_ISL_3447	A/chicken/Hebei/1/01	H9N2	GISAID
EPI_ISL_84316	A/chicken/Hebei/1/1999	H9N2	GISAID
EPI_ISL_2443	A/chicken/Hebei/1/96	H9N2	GISAID
EPI_ISL_84314	A/chicken/Hebei/11/2002	H9N2	GISAID
EPI_ISL_2171	A/chicken/Hebei/2/00	H9N2	GISAID
EPI_ISL_24723	A/chicken/Hebei/2/2002	H9N2	GISAID
EPI_ISL_2444	A/chicken/Hebei/2/98	H9N2	GISAID
EPI_ISL_2445	A/chicken/Hebei/3/98	H9N2	GISAID
EPI_ISL_8503	A/chicken/Hebei/31/00	H9N2	GISAID
EPI_ISL_71046	A/chicken/Hebei/4/2008	H9N2	GISAID
EPI_ISL_2235	A/chicken/Hebei/4/98	H9N2	GISAID
EPI_ISL_76659	A/chicken/Hebei/7/2008	H9N2	GISAID
EPI_ISL_76661	A/chicken/Hebei/A/2007	H9N2	GISAID
EPI_ISL_13995	A/chicken/Hebei/B1/2001	H9N2	GISAID
EPI_ISL_84327	A/chicken/Hebei/C6/2007	H9N2	GISAID
EPI_ISL_84326	A/chicken/Hebei/LC/2008	H9N2	GISAID
EPI_ISL_67722	A/chicken/Hebei/nj/2002	H9N2	GISAID
EPI_ISL_24724	A/chicken/Hebei/sjz2/2001	H9N2	GISAID
EPI_ISL_76662	A/chicken/Hebei/Y2/2009	H9N2	GISAID
EPI_ISL_74001	A/chicken/Heibei/8/2003	H9N2	GISAID
EPI_ISL_2236	A/chicken/Heilongjiang/10/97	H9N2	GISAID
EPI_ISL_24725	A/chicken/Heilongjiang/2/2002	H9N2	GISAID
EPI_ISL_8504	A/chicken/Heilongjiang/35/00	H9N2	GISAID
EPI_ISL_8505	A/chicken/Heilongjiang/48/01	H9N2	GISAID
EPI_ISL_68589	A/chicken/Heilongjiang/u/1998	H9N2	GISAID
EPI_ISL_24918	A/chicken/Henan/01/2007	H9N2	GISAID
EPI_ISL_76660	A/chicken/Henan/1.2/2008	H9N2	GISAID
EPI_ISL_24709	A/chicken/Henan/1/2001	H9N2	GISAID
EPI_ISL_67723	A/chicken/Henan/1/2002	H9N2	GISAID
EPI_ISL_67372	A/chicken/Henan/1/2003	H9N2	GISAID
EPI_ISL_65629	A/chicken/Henan/1/2004	H9N2	GISAID
EPI_ISL_64827	A/chicken/Henan/1/2005	H9N2	GISAID
EPI_ISL_65630	A/chicken/Henan/2/2004	H9N2	GISAID
EPI_ISL_2158	A/chicken/Henan/2/98	H9N2	GISAID
EPI_ISL_8506	A/chicken/Henan/26/00	H9N2	GISAID
EPI_ISL_8507	A/chicken/Henan/43/02	H9N2	GISAID
EPI_ISL_24710	A/chicken/Henan/5/2001	H9N2	GISAID
EPI_ISL_8508	A/chicken/Henan/5/98	H9N2	GISAID
EPI_ISL_2237	A/chicken/Henan/62/00	H9N2	GISAID
EPI_ISL_24711	A/chicken/Henan/622/2006	H9N2	GISAID
EPI_ISL_68577	A/chicken/Henan/98	H9N2	GISAID
EPI_ISL_97583	A/chicken/Henan/A16/2010	H9N2	GISAID
EPI_ISL_12623	A/chicken/Henan/A3/1998	H9N2	GISAID
EPI_ISL_97985	A/chicken/Henan/B16/2011	H9N2	GISAID
EPI_ISL_97984	A/chicken/Henan/B19/2011	H9N2	GISAID
EPI_ISL_97983	A/chicken/Henan/B6/2011	H9N2	GISAID
EPI_ISL_97634	A/chicken/Henan/B8/2010	H9N2	GISAID
EPI_ISL_97700	A/chicken/Henan/D17/2011	H9N2	GISAID
EPI_ISL_97981	A/chicken/Henan/D21/2011	H9N2	GISAID
EPI_ISL_97633	A/chicken/Henan/E1/2010	H9N2	GISAID
EPI_ISL_97979	A/chicken/Henan/E1/2011	H9N2	GISAID
EPI_ISL_97978	A/chicken/Henan/E10/2011	H9N2	GISAID
EPI_ISL_97973	A/chicken/Henan/E18/2011	H9N2	GISAID
EPI_ISL_97632	A/chicken/Henan/E2/2010	H9N2	GISAID
EPI_ISL_97972	A/chicken/Henan/E2/2011	H9N2	GISAID
EPI_ISL_97971	A/chicken/Henan/E21/2011	H9N2	GISAID
EPI_ISL_97970	A/chicken/Henan/E24/2011	H9N2	GISAID
EPI_ISL_97963	A/chicken/Henan/F10/2011	H9N2	GISAID
EPI_ISL_97962	A/chicken/Henan/F12/2011	H9N2	GISAID
EPI_ISL_97630	A/chicken/Henan/F14/2010	H9N2	GISAID
EPI_ISL_97958	A/chicken/Henan/F16/2011	H9N2	GISAID
EPI_ISL_97629	A/chicken/Henan/F17/2010	H9N2	GISAID
EPI_ISL_97628	A/chicken/Henan/F18/2010	H9N2	GISAID
EPI_ISL_97627	A/chicken/Henan/F20/2010	H9N2	GISAID
EPI_ISL_97626	A/chicken/Henan/F21/2010	H9N2	GISAID
EPI_ISL_97955	A/chicken/Henan/F21/2011	H9N2	GISAID
EPI_ISL_97947	A/chicken/Henan/F5/2011	H9N2	GISAID
EPI_ISL_97631	A/chicken/Henan/F8/2010	H9N2	GISAID
EPI_ISL_97625	A/chicken/Henan/G1/2010	H9N2	GISAID
EPI_ISL_97619	A/chicken/Henan/G11/2010	H9N2	GISAID
EPI_ISL_97617	A/chicken/Henan/G15/2010	H9N2	GISAID
EPI_ISL_97942	A/chicken/Henan/G15/2011	H9N2	GISAID
EPI_ISL_97941	A/chicken/Henan/G17/2011	H9N2	GISAID
EPI_ISL_97615	A/chicken/Henan/G19/2010	H9N2	GISAID
EPI_ISL_97940	A/chicken/Henan/G19/2011	H9N2	GISAID
EPI_ISL_97614	A/chicken/Henan/G20/2010	H9N2	GISAID
EPI_ISL_97934	A/chicken/Henan/G27/2011	H9N2	GISAID
EPI_ISL_97624	A/chicken/Henan/G4/2010	H9N2	GISAID
EPI_ISL_97924	A/chicken/Henan/H11/2011	H9N2	GISAID
EPI_ISL_97922	A/chicken/Henan/H15/2011	H9N2	GISAID
EPI_ISL_97920	A/chicken/Henan/H19/2011	H9N2	GISAID
EPI_ISL_97919	A/chicken/Henan/H22/2011	H9N2	GISAID
EPI_ISL_97917	A/chicken/Henan/H24/2011	H9N2	GISAID
EPI_ISL_97915	A/chicken/Henan/H26/2011	H9N2	GISAID
EPI_ISL_97914	A/chicken/Henan/H27/2011	H9N2	GISAID
EPI_ISL_97912	A/chicken/Henan/H29/2011	H9N2	GISAID
EPI_ISL_97910	A/chicken/Henan/H5/2011	H9N2	GISAID
EPI_ISL_97909	A/chicken/Henan/H6/2011	H9N2	GISAID
EPI_ISL_97907	A/chicken/Henan/I23/2011	H9N2	GISAID
EPI_ISL_97905	A/chicken/Henan/I27/2011	H9N2	GISAID
EPI_ISL_97901	A/chicken/Henan/J14/2011	H9N2	GISAID
EPI_ISL_97898	A/chicken/Henan/J22/2011	H9N2	GISAID
EPI_ISL_97890	A/chicken/Henan/K1/2011	H9N2	GISAID
EPI_ISL_97886	A/chicken/Henan/K19/2011	H9N2	GISAID
EPI_ISL_93809	A/chicken/Henan/N12/2009	H9N2	GISAID
EPI_ISL_93811	A/chicken/Henan/N3/2002	H9N2	GISAID
EPI_ISL_68590	A/chicken/Henan/nd/1998	H9N2	GISAID
EPI_ISL_68018	A/chicken/Henan/ni/2001	H9N2	GISAID
EPI_ISL_1269	A/chicken/Hong_Kong/739/94	H9N2	GISAID
EPI_ISL_1264	A/chicken/Hong_Kong/G23/97	H9N2	GISAID
EPI_ISL_1263	A/chicken/Hong_Kong/G9/97	H9N2	GISAID
EPI_ISL_3216	A/chicken/Hong_Kong/WF2/99	H9N2	GISAID
EPI_ISL_4452	A/chicken/HongKong/AP45/03	H9N2	GISAID
EPI_ISL_4453	A/chicken/HongKong/BD90/03	H9N2	GISAID
EPI_ISL_4451	A/chicken/HongKong/CSW153/03	H9N2	GISAID
EPI_ISL_4454	A/chicken/HongKong/CSW291/03	H9N2	GISAID
EPI_ISL_4455	A/chicken/HongKong/CSW304/03	H9N2	GISAID
EPI_ISL_4456	A/chicken/HongKong/FY23/03	H9N2	GISAID
EPI_ISL_4458	A/chicken/HongKong/NT142/03	H9N2	GISAID
EPI_ISL_4467	A/chicken/HongKong/NT366/03	H9N2	GISAID
EPI_ISL_4459	A/chicken/HongKong/SF1/03	H9N2	GISAID
EPI_ISL_4460	A/chicken/HongKong/SSP101/03	H9N2	GISAID
EPI_ISL_4468	A/chicken/HongKong/SSP418/03	H9N2	GISAID
EPI_ISL_4461	A/chicken/HongKong/TP38/03	H9N2	GISAID
EPI_ISL_4466	A/chicken/HongKong/WF120/03	H9N2	GISAID
EPI_ISL_4462	A/chicken/HongKong/WF126/03	H9N2	GISAID
EPI_ISL_4469	A/chicken/HongKong/YU427/03	H9N2	GISAID
EPI_ISL_69859	A/chicken/Hubei	H9N2	GISAID
EPI_ISL_96868	A/chicken/Hubei/01/1999	H9N2	GISAID
EPI_ISL_97682	A/chicken/Hubei/558/2011	H9N2	GISAID
EPI_ISL_97681	A/chicken/Hubei/580/2011	H9N2	GISAID
EPI_ISL_97680	A/chicken/Hubei/581/2011	H9N2	GISAID
EPI_ISL_97679	A/chicken/Hubei/661/2011	H9N2	GISAID
EPI_ISL_97553	A/chicken/Hubei/A1/2010	H9N2	GISAID
EPI_ISL_97551	A/chicken/Hubei/A23/2010	H9N2	GISAID
EPI_ISL_97550	A/chicken/Hubei/A25/2010	H9N2	GISAID
EPI_ISL_97549	A/chicken/Hubei/A27/2010	H9N2	GISAID
EPI_ISL_97548	A/chicken/Hubei/A28/2010	H9N2	GISAID
EPI_ISL_97546	A/chicken/Hubei/A30/2010	H9N2	GISAID
EPI_ISL_97552	A/chicken/Hubei/A4/2010	H9N2	GISAID
EPI_ISL_98260	A/chicken/Hubei/B23/2009	H9N2	GISAID
EPI_ISL_14003	A/chicken/Hubei/C1/2007	H9N2	GISAID
EPI_ISL_97543	A/chicken/Hubei/D17/2010	H9N2	GISAID
EPI_ISL_97544	A/chicken/Hubei/D2/2010	H9N2	GISAID
EPI_ISL_69396	A/chicken/Hubei/E13/2008	H9N2	GISAID
EPI_ISL_97536	A/chicken/Hubei/E13/2010	H9N2	GISAID
EPI_ISL_97534	A/chicken/Hubei/E16/2010	H9N2	GISAID
EPI_ISL_97533	A/chicken/Hubei/E17/2010	H9N2	GISAID
EPI_ISL_97532	A/chicken/Hubei/E18/2010	H9N2	GISAID
EPI_ISL_97531	A/chicken/Hubei/E19/2010	H9N2	GISAID
EPI_ISL_97530	A/chicken/Hubei/E20/2010	H9N2	GISAID
EPI_ISL_97528	A/chicken/Hubei/E23/2010	H9N2	GISAID
EPI_ISL_97539	A/chicken/Hubei/E8/2010	H9N2	GISAID
EPI_ISL_69395	A/chicken/Hubei/E9/2008	H9N2	GISAID
EPI_ISL_97538	A/chicken/Hubei/E9/2010	H9N2	GISAID
EPI_ISL_97520	A/chicken/Hubei/G10/2010	H9N2	GISAID
EPI_ISL_97518	A/chicken/Hubei/G19/2010	H9N2	GISAID
EPI_ISL_97525	A/chicken/Hubei/G2/2010	H9N2	GISAID
EPI_ISL_97517	A/chicken/Hubei/G21/2010	H9N2	GISAID
EPI_ISL_97516	A/chicken/Hubei/G27/2010	H9N2	GISAID
EPI_ISL_97524	A/chicken/Hubei/G4/2010	H9N2	GISAID
EPI_ISL_97523	A/chicken/Hubei/G5/2010	H9N2	GISAID
EPI_ISL_97522	A/chicken/Hubei/G6/2010	H9N2	GISAID
EPI_ISL_97521	A/chicken/Hubei/G9/2010	H9N2	GISAID
EPI_ISL_89723	A/chicken/Hubei/GYC/2011	H9N2	GISAID
EPI_ISL_69398	A/chicken/Hubei/HE27/2008	H9N2	GISAID
EPI_ISL_89730	A/chicken/Hubei/HWC/2011	H9N2	GISAID
EPI_ISL_98297	A/chicken/Hubei/J9/2009	H9N2	GISAID
EPI_ISL_99617	A/chicken/Hubei/LLM03/2011	H9N2	GISAID
EPI_ISL_98295	A/chicken/Hubei/N11/2009	H9N2	GISAID
EPI_ISL_98293	A/chicken/Hubei/X21/2009	H9N2	GISAID
EPI_ISL_89729	A/chicken/Hubei/ZWC/2011	H9N2	GISAID
EPI_ISL_7373	A/chicken/Hunan/2536/2005	H9N2	GISAID
EPI_ISL_7374	A/chicken/Hunan/2903/2005	H9N2	GISAID
EPI_ISL_7375	A/chicken/Hunan/3369/2005	H9N2	GISAID
EPI_ISL_7377	A/chicken/Hunan/4246/2005	H9N2	GISAID
EPI_ISL_7378	A/chicken/Hunan/4444/2005	H9N2	GISAID
EPI_ISL_7379	A/chicken/Hunan/5260/2005	H9N2	GISAID
EPI_ISL_7380	A/chicken/Hunan/5700/2005	H9N2	GISAID
EPI_ISL_7381	A/chicken/Hunan/6108/2005	H9N2	GISAID
EPI_ISL_67726	A/chicken/Hunan/774/2002	H9N2	GISAID
EPI_ISL_29150	A/chicken/Hunan/HA17/2007	H9N2	GISAID
EPI_ISL_29149	A/chicken/Hunan/HB25/2007	H9N2	GISAID
EPI_ISL_29148	A/chicken/Hunan/HB29/2007	H9N2	GISAID
EPI_ISL_29166	A/chicken/Hunan/HB5/2007	H9N2	GISAID
EPI_ISL_29167	A/chicken/Hunan/HE5/2007	H9N2	GISAID
EPI_ISL_29147	A/chicken/Hunan/HG29/2007	H9N2	GISAID
EPI_ISL_89704	A/chicken/Hunan/U6/2010	H9N2	GISAID
EPI_ISL_9474	A/chicken/Iarah/1376/03	H9N2	GISAID
EPI_ISL_97221	A/chicken/India/IVRI-0004/2010	H9N2	GISAID
EPI_ISL_97215	A/chicken/India/IVRI-0011/2011	H9N2	GISAID
EPI_ISL_85793	A/chicken/Iran/10VIR854-1/2002	H9N2	GISAID
EPI_ISL_85792	A/chicken/Iran/10VIR854-3/2009	H9N2	GISAID
EPI_ISL_85794	A/chicken/Iran/10VIR854-4/2009	H9N2	GISAID
EPI_ISL_85791	A/chicken/Iran/10VIR854-5/2008	H9N2	GISAID
EPI_ISL_64828	A/chicken/Iran/119/2005	H9N2	GISAID
EPI_ISL_1498	A/chicken/Iran/11T/99	H9N2	GISAID
EPI_ISL_65650	A/chicken/Iran/133/2004	H9N2	GISAID
EPI_ISL_65651	A/chicken/Iran/152/2004	H9N2	GISAID
EPI_ISL_64311	A/chicken/Iran/20/2006	H9N2	GISAID
EPI_ISL_68019	A/chicken/Iran/233/2001	H9N2	GISAID
EPI_ISL_67727	A/chicken/Iran/284/2002	H9N2	GISAID
EPI_ISL_67377	A/chicken/Iran/320/2003	H9N2	GISAID
EPI_ISL_68020	A/chicken/Iran/450/2001	H9N2	GISAID
EPI_ISL_67728	A/chicken/Iran/466/2002	H9N2	GISAID
EPI_ISL_68363	A/chicken/Iran/565/2000	H9N2	GISAID
EPI_ISL_68364	A/chicken/Iran/584/2000	H9N2	GISAID
EPI_ISL_68591	A/chicken/Iran/661/1998	H9N2	GISAID
EPI_ISL_64312	A/chicken/Iran/68/2006	H9N2	GISAID
EPI_ISL_68592	A/chicken/Iran/698/1998	H9N2	GISAID
EPI_ISL_68496	A/chicken/Iran/705/1999	H9N2	GISAID
EPI_ISL_68497	A/chicken/Iran/772/1999	H9N2	GISAID
EPI_ISL_64829	A/chicken/Iran/86/2005	H9N2	GISAID
EPI_ISL_67378	A/chicken/Iran/92/2003	H9N2	GISAID
EPI_ISL_2849	A/chicken/Iran/AG541/2000	H9N2	GISAID
EPI_ISL_11184	A/chicken/Iran/B102/2005	H9N2	GISAID
EPI_ISL_11185	A/chicken/Iran/B11A/2005	H9N2	GISAID
EPI_ISL_11177	A/chicken/Iran/B263/2003	H9N2	GISAID
EPI_ISL_11179	A/chicken/Iran/B308A/2004	H9N2	GISAID
EPI_ISL_11180	A/chicken/Iran/B308B/2004	H9N2	GISAID
EPI_ISL_11178	A/chicken/Iran/B314/2003	H9N2	GISAID
EPI_ISL_11181	A/chicken/Iran/B322/2004	H9N2	GISAID
EPI_ISL_11186	A/chicken/Iran/B326/2005	H9N2	GISAID
EPI_ISL_11182	A/chicken/Iran/B76/2004	H9N2	GISAID
EPI_ISL_11183	A/chicken/Iran/B99/2005	H9N2	GISAID
EPI_ISL_97042	A/chicken/Iran/EBGV-88/2010	H9N2	GISAID
EPI_ISL_10545	A/chicken/Iran/L248/03	H9N2	GISAID
EPI_ISL_11176	A/chicken/Iran/L252/2003	H9N2	GISAID
EPI_ISL_63003	A/chicken/Iran/RZ28/2008	H9N2	GISAID
EPI_ISL_63004	A/chicken/Iran/RZ36/2008	H9N2	GISAID
EPI_ISL_63005	A/chicken/Iran/RZ37/2008	H9N2	GISAID
EPI_ISL_63006	A/chicken/Iran/RZ42/2008	H9N2	GISAID
EPI_ISL_63007	A/chicken/Iran/RZ53/2008	H9N2	GISAID
EPI_ISL_63443	A/chicken/Iran/SH1/2007	H9N2	GISAID
EPI_ISL_63444	A/chicken/Iran/SH2/2007	H9N2	GISAID
EPI_ISL_29275	A/chicken/Iran/SS1/1998	H9N2	GISAID
EPI_ISL_29276	A/chicken/Iran/SS2/2008	H9N2	GISAID
EPI_ISL_15732	A/chicken/Iran/TH186/2007	H9N2	GISAID
EPI_ISL_15730	A/chicken/Iran/TH286/2007	H9N2	GISAID
EPI_ISL_15731	A/chicken/Iran/TH386/2007	H9N2	GISAID
EPI_ISL_29274	A/chicken/Iran/TH486-masoumi/2007	H9N2	GISAID
EPI_ISL_15728	A/chicken/Iran/TH77/1998	H9N2	GISAID
EPI_ISL_15734	A/chicken/Iran/TH78/1999	H9N2	GISAID
EPI_ISL_15735	A/chicken/Iran/TH79/2000	H9N2	GISAID
EPI_ISL_15736	A/chicken/Iran/TH80/2000	H9N2	GISAID
EPI_ISL_15733	A/chicken/Iran/TH81/2002	H9N2	GISAID
EPI_ISL_15729	A/chicken/Iran/TH85/2007	H9N2	GISAID
EPI_ISL_63445	A/chicken/Iran/THLBM861/2007	H9N2	GISAID
EPI_ISL_63446	A/chicken/Iran/THLBM862/2007	H9N2	GISAID
EPI_ISL_63447	A/chicken/Iran/THLBM863/2007	H9N2	GISAID
EPI_ISL_63448	A/chicken/Iran/THLBM864/2007	H9N2	GISAID
EPI_ISL_63449	A/chicken/Iran/THLBM865/2007	H9N2	GISAID
EPI_ISL_63450	A/chicken/Iran/THLBM866/2007	H9N2	GISAID
EPI_ISL_63451	A/chicken/Iran/THLBM867/2007	H9N2	GISAID
EPI_ISL_63452	A/chicken/Iran/THLBM868/2007	H9N2	GISAID
EPI_ISL_85797	A/chicken/Iraq/09vir579-8/2005	H9N2	GISAID
EPI_ISL_63453	A/chicken/Israel/1033/2007	H9N2	GISAID
EPI_ISL_30437	A/chicken/Israel/1040/2007	H9N2	GISAID
EPI_ISL_63454	A/chicken/Israel/114/2007	H9N2	GISAID
EPI_ISL_64314	A/chicken/Israel/1525/2006	H9N2	GISAID
EPI_ISL_64315	A/chicken/Israel/1548/2006	H9N2	GISAID
EPI_ISL_64316	A/chicken/Israel/1638/2006	H9N2	GISAID
EPI_ISL_19621	A/chicken/Israel/178/2006	H9N2	GISAID
EPI_ISL_30439	A/chicken/Israel/182/2008	H9N2	GISAID
EPI_ISL_30440	A/chicken/Israel/184/2009	H9N2	GISAID
EPI_ISL_10376	A/chicken/Israel/1953/2004	H9N2	GISAID
EPI_ISL_10377	A/chicken/Israel/1966/2004	H9N2	GISAID
EPI_ISL_63455	A/chicken/Israel/215/2007	H9N2	GISAID
EPI_ISL_19622	A/chicken/Israel/282/2005	H9N2	GISAID
EPI_ISL_63008	A/chicken/Israel/292/2008	H9N2	GISAID
EPI_ISL_30441	A/chicken/Israel/310/2008	H9N2	GISAID
EPI_ISL_30442	A/chicken/Israel/330/2008	H9N2	GISAID
EPI_ISL_30443	A/chicken/Israel/375/2007	H9N2	GISAID
EPI_ISL_63456	A/chicken/Israel/386/2007	H9N2	GISAID
EPI_ISL_63457	A/chicken/Israel/402/2007	H9N2	GISAID
EPI_ISL_63458	A/chicken/Israel/449/2007	H9N2	GISAID
EPI_ISL_63009	A/chicken/Israel/524/2008	H9N2	GISAID
EPI_ISL_30438	A/chicken/Israel/54/2008	H9N2	GISAID
EPI_ISL_19624	A/chicken/Israel/554/2005	H9N2	GISAID
EPI_ISL_30445	A/chicken/Israel/694/2008	H9N2	GISAID
EPI_ISL_30446	A/chicken/Israel/702/2008	H9N2	GISAID
EPI_ISL_63459	A/chicken/Israel/728/2007	H9N2	GISAID
EPI_ISL_19620	A/chicken/Israel/793/2005	H9N2	GISAID
EPI_ISL_19627	A/chicken/Israel/853/2005	H9N2	GISAID
EPI_ISL_30447	A/chicken/Israel/869/2007	H9N2	GISAID
EPI_ISL_30448	A/chicken/Israel/883/2008	H9N2	GISAID
EPI_ISL_19629	A/chicken/Israel/909/2005	H9N2	GISAID
EPI_ISL_63460	A/chicken/Israel/933/2007	H9N2	GISAID
EPI_ISL_30449	A/chicken/Israel/951/2007	H9N2	GISAID
EPI_ISL_30450	A/chicken/Israel/953/2007	H9N2	GISAID
EPI_ISL_73326	A/chicken/Jiande/01/2009	H9N2	GISAID
EPI_ISL_90381	A/chicken/Jiangsu/01/2003	H9N2	GISAID
EPI_ISL_8510	A/chicken/Jiangsu/1/00	H9N2	GISAID
EPI_ISL_68599	A/chicken/Jiangsu/1/1998	H9N2	GISAID
EPI_ISL_68502	A/chicken/Jiangsu/1/1999	H9N2	GISAID
EPI_ISL_67729	A/chicken/Jiangsu/1/2002	H9N2	GISAID
EPI_ISL_65631	A/chicken/Jiangsu/1/2004	H9N2	GISAID
EPI_ISL_2151	A/chicken/Jiangsu/1/99	H9N2	GISAID
EPI_ISL_68025	A/chicken/Jiangsu/2/2001	H9N2	GISAID
EPI_ISL_2152	A/chicken/Jiangsu/2/98	H9N2	GISAID
EPI_ISL_90380	A/chicken/Jiangsu/48/2001	H9N2	GISAID
EPI_ISL_29822	A/chicken/Jiangsu/7/2002	H9N2	GISAID
EPI_ISL_93810	A/chicken/Jiangsu/A11/2007	H9N2	GISAID
EPI_ISL_97567	A/chicken/Jiangsu/A11/2010	H9N2	GISAID
EPI_ISL_97566	A/chicken/Jiangsu/A13/2010	H9N2	GISAID
EPI_ISL_97565	A/chicken/Jiangsu/A20/2010	H9N2	GISAID
EPI_ISL_97569	A/chicken/Jiangsu/A7/2010	H9N2	GISAID
EPI_ISL_97568	A/chicken/Jiangsu/A9/2010	H9N2	GISAID
EPI_ISL_97880	A/chicken/Jiangsu/B12/2011	H9N2	GISAID
EPI_ISL_97879	A/chicken/Jiangsu/B13/2011	H9N2	GISAID
EPI_ISL_97877	A/chicken/Jiangsu/B16/2011	H9N2	GISAID
EPI_ISL_97871	A/chicken/Jiangsu/B25/2011	H9N2	GISAID
EPI_ISL_97870	A/chicken/Jiangsu/B27/2011	H9N2	GISAID
EPI_ISL_97869	A/chicken/Jiangsu/B3/2011	H9N2	GISAID
EPI_ISL_97867	A/chicken/Jiangsu/B4/2011	H9N2	GISAID
EPI_ISL_97866	A/chicken/Jiangsu/B5/2011	H9N2	GISAID
EPI_ISL_97865	A/chicken/Jiangsu/B6/2011	H9N2	GISAID
EPI_ISL_97862	A/chicken/Jiangsu/D10/2011	H9N2	GISAID
EPI_ISL_97861	A/chicken/Jiangsu/D8/2011	H9N2	GISAID
EPI_ISL_69397	A/chicken/Jiangsu/E26/2007	H9N2	GISAID
EPI_ISL_99618	A/chicken/Jiangsu/FQD03/2011	H9N2	GISAID
EPI_ISL_97612	A/chicken/Jiangsu/G12/2010	H9N2	GISAID
EPI_ISL_97561	A/chicken/Jiangsu/H10/2010	H9N2	GISAID
EPI_ISL_97860	A/chicken/Jiangsu/H10/2011	H9N2	GISAID
EPI_ISL_97560	A/chicken/Jiangsu/H11/2010	H9N2	GISAID
EPI_ISL_97859	A/chicken/Jiangsu/H13/2011	H9N2	GISAID
EPI_ISL_97858	A/chicken/Jiangsu/H2/2011	H9N2	GISAID
EPI_ISL_97557	A/chicken/Jiangsu/H25/2010	H9N2	GISAID
EPI_ISL_97857	A/chicken/Jiangsu/H27/2011	H9N2	GISAID
EPI_ISL_97856	A/chicken/Jiangsu/H3/2011	H9N2	GISAID
EPI_ISL_97564	A/chicken/Jiangsu/H4/2010	H9N2	GISAID
EPI_ISL_97563	A/chicken/Jiangsu/H6/2010	H9N2	GISAID
EPI_ISL_97853	A/chicken/Jiangsu/I2/2011	H9N2	GISAID
EPI_ISL_97852	A/chicken/Jiangsu/I20/2011	H9N2	GISAID
EPI_ISL_97851	A/chicken/Jiangsu/I8/2011	H9N2	GISAID
EPI_ISL_3588	A/chicken/Jiangsu/JS-1/2002	H9N2	GISAID
EPI_ISL_89740	A/chicken/Jiangsu/LWC/2011	H9N2	GISAID
EPI_ISL_68026	A/chicken/Jiangsu/ng/2001	H9N2	GISAID
EPI_ISL_24726	A/chicken/Jiangsu/nj13/2001	H9N2	GISAID
EPI_ISL_24727	A/chicken/Jiangsu/nj15/2001	H9N2	GISAID
EPI_ISL_89650	A/chicken/Jiangsu/Q3/2010	H9N2	GISAID
EPI_ISL_89647	A/chicken/Jiangsu/Q7/2010	H9N2	GISAID
EPI_ISL_89646	A/chicken/Jiangsu/U1/2010	H9N2	GISAID
EPI_ISL_89645	A/chicken/Jiangsu/U2/2010	H9N2	GISAID
EPI_ISL_89644	A/chicken/Jiangsu/U3/2010	H9N2	GISAID
EPI_ISL_67730	A/chicken/Jiangsu/wa/2002	H9N2	GISAID
EPI_ISL_89734	A/chicken/Jiangsu/WXY/2011	H9N2	GISAID
EPI_ISL_89727	A/chicken/Jiangsu/ZHM/2011	H9N2	GISAID
EPI_ISL_84325	A/chicken/Jiangxi/12/2007	H9N2	GISAID
EPI_ISL_98222	A/chicken/Jilin/147/2009	H9N2	GISAID
EPI_ISL_98313	A/chicken/Jilin/181/2009	H9N2	GISAID
EPI_ISL_98348	A/chicken/Jilin/2/2009	H9N2	GISAID
EPI_ISL_98343	A/chicken/Jilin/209/2009	H9N2	GISAID
EPI_ISL_98273	A/chicken/Jilin/43/2009	H9N2	GISAID
EPI_ISL_8509	A/chicken/Jilin/53/01	H9N2	GISAID
EPI_ISL_98270	A/chicken/Jilin/63/2009	H9N2	GISAID
EPI_ISL_24746	A/chicken/Jilin/dh1024/2007	H9N2	GISAID
EPI_ISL_83291	A/chicken/Jilin/G12/2009	H9N2	GISAID
EPI_ISL_98347	A/chicken/Jilin/M19/2009	H9N2	GISAID
EPI_ISL_98346	A/chicken/Jilin/X27/2009	H9N2	GISAID
EPI_ISL_98268	A/chicken/Jilin/Y20/2009	H9N2	GISAID
EPI_ISL_85779	A/chicken/Jordan/09vir579-2/2007	H9N2	GISAID
EPI_ISL_85778	A/chicken/Jordan/09vir579-3/2007	H9N2	GISAID
EPI_ISL_85772	A/chicken/Jordan/1436-1451/2004	H9N2	GISAID
EPI_ISL_85774	A/chicken/Jordan/1436-643/2004	H9N2	GISAID
EPI_ISL_85775	A/chicken/Jordan/1436-997/2004	H9N2	GISAID
EPI_ISL_85776	A/chicken/Jordan/436-1/2010	H9N2	GISAID
EPI_ISL_85777	A/chicken/Jordan/436-2/2010	H9N2	GISAID
EPI_ISL_335	A/chicken/Kobe/aq26/2001	H9N2	GISAID
EPI_ISL_13845	A/chicken/Korea/01310/2001	H9N2	GISAID
EPI_ISL_10526	A/chicken/Korea/164/04	H9N8	GISAID
EPI_ISL_1275	A/chicken/Korea/25232-96006/96	H9N2	GISAID
EPI_ISL_1274	A/chicken/Korea/38349-p96323/96	H9N2	GISAID
EPI_ISL_77209	A/chicken/Korea/A170/2009	H9N2	GISAID
EPI_ISL_70424	A/chicken/Korea/ADL050895/2005	H9N2	GISAID
EPI_ISL_70425	A/chicken/Korea/ADL060050/2006	H9N2	GISAID
EPI_ISL_70426	A/chicken/Korea/ADL060162/2006	H9N2	GISAID
EPI_ISL_70427	A/chicken/Korea/ADL060168/2006	H9N2	GISAID
EPI_ISL_70428	A/chicken/Korea/ADL060196/2006	H9N2	GISAID
EPI_ISL_70429	A/chicken/Korea/ADL060580/2006	H9N2	GISAID
EPI_ISL_70439	A/chicken/Korea/ADL060831/2006	H9N2	GISAID
EPI_ISL_70430	A/chicken/Korea/ADL060845/2006	H9N2	GISAID
EPI_ISL_70431	A/chicken/Korea/ADL060865/2006	H9N2	GISAID
EPI_ISL_70432	A/chicken/Korea/ADL062128/2006	H9N2	GISAID
EPI_ISL_70433	A/chicken/Korea/ADL062203/2006	H9N2	GISAID
EPI_ISL_70434	A/chicken/Korea/ADL070097/2007	H9N2	GISAID
EPI_ISL_70438	A/chicken/Korea/ADL070121/2007	H9N2	GISAID
EPI_ISL_70435	A/chicken/Korea/ADL070575/2007	H9N2	GISAID
EPI_ISL_70436	A/chicken/Korea/ADL070801/2007	H9N2	GISAID
EPI_ISL_70440	A/chicken/Korea/ADL071783/2007	H9N2	GISAID
EPI_ISL_68688	A/chicken/Korea/AI-96004/1996	H9N2	GISAID
EPI_ISL_86563	A/chicken/Korea/GH2/2007	H9N2	GISAID
EPI_ISL_84597	A/chicken/Korea/HC0410/2009	H9N2	GISAID
EPI_ISL_84582	A/chicken/Korea/HC09/2009	H9N2	GISAID
EPI_ISL_98913	A/chicken/Korea/KNUGJ09/2009	H9N2	GISAID
EPI_ISL_98908	A/chicken/Korea/KNUSWR09/2009	H9N2	GISAID
EPI_ISL_1446	A/chicken/Korea/MS96/96	H9N2	GISAID
EPI_ISL_68689	A/chicken/Korea/MS96-CE6/1996	H9N2	GISAID
EPI_ISL_4618	A/chicken/Korea/S1/2003	H9N2	GISAID
EPI_ISL_4675	A/chicken/Korea/S18/03	H9N2	GISAID
EPI_ISL_9886	A/chicken/Korea/S21/04	H9N2	GISAID
EPI_ISL_4668	A/chicken/Korea/S4/03	H9N2	GISAID
EPI_ISL_84581	A/chicken/Korea/SH0802/2008	H9N2	GISAID
EPI_ISL_84583	A/chicken/Korea/SH0902/2009	H9N2	GISAID
EPI_ISL_84584	A/chicken/Korea/SH0903/2009	H9N2	GISAID
EPI_ISL_84586	A/chicken/Korea/SH0905/2009	H9N2	GISAID
EPI_ISL_84587	A/chicken/Korea/SH0906/2009	H9N2	GISAID
EPI_ISL_84588	A/chicken/Korea/SH0907/2009	H9N2	GISAID
EPI_ISL_84591	A/chicken/Korea/SH0910/2009	H9N2	GISAID
EPI_ISL_84592	A/chicken/Korea/SH0911/2009	H9N2	GISAID
EPI_ISL_84594	A/chicken/Korea/SH0913/2009	H9N2	GISAID
EPI_ISL_84595	A/chicken/Korea/SH0914/2009	H9N2	GISAID
EPI_ISL_85795	A/chicken/Kurdistan/4693-88/2009	H9N2	GISAID
EPI_ISL_85796	A/chicken/Kurdistan/4693-9/2009	H9N2	GISAID
EPI_ISL_2159	A/chicken/Liaoning/1/00	H9N2	GISAID
EPI_ISL_2160	A/chicken/Liaoning/2/00	H9N2	GISAID
EPI_ISL_63461	A/chicken/Liaoning/21/7/2007	H9N2	GISAID
EPI_ISL_29160	A/chicken/Liaoning/3/2007	H9N2	GISAID
EPI_ISL_63462	A/chicken/Liaoning/41/17/2007	H9N2	GISAID
EPI_ISL_68503	A/chicken/Liaoning/99	H9N2	GISAID
EPI_ISL_24728	A/chicken/Liaoning/hld1024/2007	H9N2	GISAID
EPI_ISL_84546	A/chicken/Lincang/711/2008	H9N2	GISAID
EPI_ISL_9357	A/chicken/Maale_HaHamisha/90658/00	H9N2	GISAID
EPI_ISL_68504	A/chicken/Middle_East/ED-1/1999	H9N2	GISAID
EPI_ISL_3692	A/chicken/Mudanjiang/0823/2000	H9N2	GISAID
EPI_ISL_3197	A/chicken/Nanchang/4-301/2001	H9N2	GISAID
EPI_ISL_74002	A/chicken/Nanjing/13/2003	H9N2	GISAID
EPI_ISL_67738	A/chicken/Neimonggu/nk/2002	H9N2	GISAID
EPI_ISL_97699	A/chicken/Ningxia/04/2011	H9N2	GISAID
EPI_ISL_97693	A/chicken/Ningxia/101/2011	H9N2	GISAID
EPI_ISL_97692	A/chicken/Ningxia/102/2011	H9N2	GISAID
EPI_ISL_97691	A/chicken/Ningxia/112/2011	H9N2	GISAID
EPI_ISL_97689	A/chicken/Ningxia/153/2011	H9N2	GISAID
EPI_ISL_97688	A/chicken/Ningxia/181/2011	H9N2	GISAID
EPI_ISL_97687	A/chicken/Ningxia/182/2011	H9N2	GISAID
EPI_ISL_97685	A/chicken/Ningxia/184/2011	H9N2	GISAID
EPI_ISL_97684	A/chicken/Ningxia/189/2011	H9N2	GISAID
EPI_ISL_97698	A/chicken/Ningxia/29/2011	H9N2	GISAID
EPI_ISL_97696	A/chicken/Ningxia/31/2011	H9N2	GISAID
EPI_ISL_8512	A/chicken/Ningxia/4/99	H9N2	GISAID
EPI_ISL_97695	A/chicken/Ningxia/47/2011	H9N2	GISAID
EPI_ISL_2238	A/chicken/Ningxia/5/99	H9N2	GISAID
EPI_ISL_97694	A/chicken/Ningxia/99/2011	H9N2	GISAID
EPI_ISL_97848	A/chicken/Ningxia/A1/2011	H9N2	GISAID
EPI_ISL_97846	A/chicken/Ningxia/A15/2011	H9N2	GISAID
EPI_ISL_98329	A/chicken/Ningxia/A18/2009	H9N2	GISAID
EPI_ISL_97845	A/chicken/Ningxia/A2/2011	H9N2	GISAID
EPI_ISL_97844	A/chicken/Ningxia/A21/2011	H9N2	GISAID
EPI_ISL_97840	A/chicken/Ningxia/A8/2011	H9N2	GISAID
EPI_ISL_98333	A/chicken/Ningxia/E24/2009	H9N2	GISAID
EPI_ISL_83292	A/chicken/Ningxia/F15/2009	H9N2	GISAID
EPI_ISL_98330	A/chicken/Ningxia/N22/2009	H9N2	GISAID
EPI_ISL_83293	A/chicken/Ningxia/R13/2009	H9N2	GISAID
EPI_ISL_83294	A/chicken/Ningxia/S17/2009	H9N2	GISAID
EPI_ISL_78706	A/chicken/Orissa/2317/2004	H9N2	GISAID
EPI_ISL_342	A/chicken/Osaka/aq19/2001	H9N2	GISAID
EPI_ISL_333	A/chicken/Osaka/aq48/97	H9N2	GISAID
EPI_ISL_336	A/chicken/Osaka/aq58/2001	H9N2	GISAID
EPI_ISL_337	A/chicken/Osaka/aq69/2001	H9N2	GISAID
EPI_ISL_1501	A/chicken/Pakistan/2/99	H9N2	GISAID
EPI_ISL_1503	A/chicken/Pakistan/4/99	H9N2	GISAID
EPI_ISL_1504	A/chicken/Pakistan/5/99	H9N2	GISAID
EPI_ISL_2847	A/chicken/Pakistan/AG519/98	H9N2	GISAID
EPI_ISL_96803	A/chicken/Pakistan/NCVI-09/2010	H9N2	GISAID
EPI_ISL_96802	A/chicken/Pakistan/NCVI-10/2010	H9N2	GISAID
EPI_ISL_96801	A/chicken/Pakistan/NCVI-11/2010	H9N2	GISAID
EPI_ISL_96800	A/chicken/Pakistan/NCVI-12/2010	H9N2	GISAID
EPI_ISL_29787	A/chicken/Pakistan/UDL-01/2005	H9N2	GISAID
EPI_ISL_29789	A/chicken/Pakistan/UDL-01/2006	H9N2	GISAID
EPI_ISL_29785	A/chicken/Pakistan/UDL-01/2007	H9N2	GISAID
EPI_ISL_29793	A/chicken/Pakistan/UDL-01/2008	H9N2	GISAID
EPI_ISL_29788	A/chicken/Pakistan/UDL-02/2005	H9N2	GISAID
EPI_ISL_29790	A/chicken/Pakistan/UDL-02/2006	H9N2	GISAID
EPI_ISL_29794	A/chicken/Pakistan/UDL-02/2008	H9N2	GISAID
EPI_ISL_29791	A/chicken/Pakistan/UDL-03/2005	H9N2	GISAID
EPI_ISL_29795	A/chicken/Pakistan/UDL-03/2008	H9N2	GISAID
EPI_ISL_29786	A/chicken/Pakistan/UDL-04/2006	H9N2	GISAID
EPI_ISL_29796	A/chicken/Pakistan/UDL-04/2007	H9N2	GISAID
EPI_ISL_9367	A/chicken/Pardes-Hana-Carcur/1475/03	H9N2	GISAID
EPI_ISL_84538	A/chicken/Puer/411/2009	H9N2	GISAID
EPI_ISL_27601	A/chicken/Punjab/2063/2003	H9N2	GISAID
EPI_ISL_85798	A/chicken/Qatar/4576-4/2008	H9N2	GISAID
EPI_ISL_74004	A/chicken/Sandong/Li/2008	H9N2	GISAID
EPI_ISL_85780	A/chicken/Saudi_Arabia/08vir3489-33-as638/2005	H9N2	GISAID
EPI_ISL_85781	A/chicken/Saudi_Arabia/08vir3489-38-as92/2005	H9N2	GISAID
EPI_ISL_85782	A/chicken/Saudi_Arabia/08vir3489-44-as253/2006	H9N2	GISAID
EPI_ISL_85786	A/chicken/Saudi_Arabia/08vir3489-47-as215/2007	H9N2	GISAID
EPI_ISL_85785	A/chicken/Saudi_Arabia/08vir3489-48-as997/2007	H9N2	GISAID
EPI_ISL_85788	A/chicken/Saudi_Arabia/08vir3489-50-as118/2008	H9N2	GISAID
EPI_ISL_85787	A/chicken/Saudi_Arabia/08vir3489-51-as366/2008	H9N2	GISAID
EPI_ISL_2850	A/chicken/Saudi_Arabia/AG516/2000	H9	GISAID
EPI_ISL_87538	A/chicken/Saudi_Arabia/CP7/1998	H9N2	GISAID
EPI_ISL_80956	A/chicken/Saudi_Arabia/EPD-22-01/2002	H9N2	GISAID
EPI_ISL_68602	A/chicken/Shandong/1/1998	H9N2	GISAID
EPI_ISL_68378	A/chicken/Shandong/1/2000	H9N2	GISAID
EPI_ISL_67390	A/chicken/Shandong/1/2003	H9N2	GISAID
EPI_ISL_65632	A/chicken/Shandong/1/2004	H9N2	GISAID
EPI_ISL_84324	A/chicken/Shandong/1/2006	H9N2	GISAID
EPI_ISL_82191	A/chicken/Shandong/1/2008	H9N2	GISAID
EPI_ISL_2161	A/chicken/Shandong/1/98	H9N2	GISAID
EPI_ISL_84323	A/chicken/Shandong/12/2008	H9N2	GISAID
EPI_ISL_84321	A/chicken/Shandong/1231/2008	H9N2	GISAID
EPI_ISL_4851	A/chicken/Shandong/2/02	H9	GISAID
EPI_ISL_24712	A/chicken/Shandong/2/2003	H9N2	GISAID
EPI_ISL_2162	A/chicken/Shandong/2/99	H9N2	GISAID
EPI_ISL_84322	A/chicken/Shandong/22/2008	H9N2	GISAID
EPI_ISL_84313	A/chicken/Shandong/2h/2001	H9N2	GISAID
EPI_ISL_2240	A/chicken/Shandong/6/96	H9N2	GISAID
EPI_ISL_8513	A/chicken/Shandong/7/96	H9N2	GISAID
EPI_ISL_68578	A/chicken/Shandong/98	H9N2	GISAID
EPI_ISL_80509	A/chicken/Shandong/A1/2009	H9N2	GISAID
EPI_ISL_97249	A/chicken/Shandong/B/2009	H9N2	GISAID
EPI_ISL_68379	A/chicken/Shandong/B1/2000	H9N2	GISAID
EPI_ISL_77227	A/chicken/Shandong/BD/2009	H9N2	GISAID
EPI_ISL_82193	A/chicken/Shandong/C/2009	H9N2	GISAID
EPI_ISL_24731	A/chicken/Shandong/cy1127/2007	H9N2	GISAID
EPI_ISL_97248	A/chicken/Shandong/E/2010	H9N2	GISAID
EPI_ISL_77200	A/chicken/Shandong/FX/2009	H9N2	GISAID
EPI_ISL_97837	A/chicken/Shandong/H30/2011	H9N2	GISAID
EPI_ISL_97836	A/chicken/Shandong/H7/2011	H9N2	GISAID
EPI_ISL_77198	A/chicken/Shandong/HY/2009	H9N2	GISAID
EPI_ISL_97834	A/chicken/Shandong/J6/2011	H9N2	GISAID
EPI_ISL_77230	A/chicken/Shandong/JN/1999	H9N2	GISAID
EPI_ISL_77228	A/chicken/Shandong/JN4/2005	H9N2	GISAID
EPI_ISL_24729	A/chicken/Shandong/jn408/2007	H9N2	GISAID
EPI_ISL_77229	A/chicken/Shandong/JN5/2005	H9N2	GISAID
EPI_ISL_97247	A/chicken/Shandong/K/2010	H9N2	GISAID
EPI_ISL_97246	A/chicken/Shandong/L/2010	H9N2	GISAID
EPI_ISL_24732	A/chicken/Shandong/lc1124/2007	H9N2	GISAID
EPI_ISL_77231	A/chicken/Shandong/LW/1999	H9N2	GISAID
EPI_ISL_24919	A/chicken/Shandong/lx06/2007	H9N2	GISAID
EPI_ISL_24737	A/chicken/Shandong/lx1023/2007	H9N2	GISAID
EPI_ISL_24738	A/chicken/Shandong/lx1027/2007	H9N2	GISAID
EPI_ISL_24739	A/chicken/Shandong/lx1029/2007	H9N2	GISAID
EPI_ISL_24740	A/chicken/Shandong/lx1129/2007	H9N2	GISAID
EPI_ISL_24714	A/chicken/Shandong/lx316/2007	H9N2	GISAID
EPI_ISL_24733	A/chicken/Shandong/lx316/2008	H9N2	GISAID
EPI_ISL_24734	A/chicken/Shandong/lx327/2007	H9N2	GISAID
EPI_ISL_24735	A/chicken/Shandong/lx331/2007	H9N2	GISAID
EPI_ISL_24736	A/chicken/Shandong/lx414/2007	H9N2	GISAID
EPI_ISL_24716	A/chicken/Shandong/lx827/2007	H9N2	GISAID
EPI_ISL_24715	A/chicken/Shandong/lx929/2007	H9N2	GISAID
EPI_ISL_84315	A/chicken/Shandong/LY/2003	H9N2	GISAID
EPI_ISL_84320	A/chicken/Shandong/LY/2006	H9N2	GISAID
EPI_ISL_77232	A/chicken/Shandong/LY/2008	H9N2	GISAID
EPI_ISL_24713	A/chicken/Shandong/ly421/2007	H9N2	GISAID
EPI_ISL_97245	A/chicken/Shandong/M/2010	H9N2	GISAID
EPI_ISL_24741	A/chicken/Shandong/mp1224/2007	H9N2	GISAID
EPI_ISL_97244	A/chicken/Shandong/N/2010	H9N2	GISAID
EPI_ISL_77197	A/chicken/Shandong/PD/2009	H9N2	GISAID
EPI_ISL_24920	A/chicken/Shandong/qd04/2007	H9N2	GISAID
EPI_ISL_77233	A/chicken/Shandong/S2/2005	H9N2	GISAID
EPI_ISL_82537	A/chicken/Shandong/SD0014/2008	H9N2	GISAID
EPI_ISL_77201	A/chicken/Shandong/SG1/2009	H9N2	GISAID
EPI_ISL_77202	A/chicken/Shandong/SG2/2009	H9N2	GISAID
EPI_ISL_97602	A/chicken/Shandong/TH9/2010	H9N2	GISAID
EPI_ISL_24922	A/chicken/Shandong/wd01/2007	H9N2	GISAID
EPI_ISL_97830	A/chicken/Shandong/WE11/2011	H9N2	GISAID
EPI_ISL_97823	A/chicken/Shandong/WE26/2011	H9N2	GISAID
EPI_ISL_97812	A/chicken/Shandong/WG10/2011	H9N2	GISAID
EPI_ISL_97810	A/chicken/Shandong/WG16/2011	H9N2	GISAID
EPI_ISL_77199	A/chicken/Shandong/WL/2009	H9N2	GISAID
EPI_ISL_24742	A/chicken/Shandong/yt1105/2007	H9N2	GISAID
EPI_ISL_84319	A/chicken/Shandong/ZB/2007	H9N2	GISAID
EPI_ISL_24730	A/chicken/Shandong/zc820/2006	H9N2	GISAID
EPI_ISL_3462	A/chicken/Shanghai/1/02	H9N2	GISAID
EPI_ISL_25005	A/chicken/Shanghai/1/2002	H9N2	GISAID
EPI_ISL_8514	A/chicken/Shanghai/10/01	H9N2	GISAID
EPI_ISL_25002	A/chicken/Shanghai/12/2001	H9N2	GISAID
EPI_ISL_25003	A/chicken/Shanghai/14/2001	H9N2	GISAID
EPI_ISL_25004	A/chicken/Shanghai/16/2001	H9N2	GISAID
EPI_ISL_24997	A/chicken/Shanghai/2/1999	H9N2	GISAID
EPI_ISL_25000	A/chicken/Shanghai/2/2001	H9N2	GISAID
EPI_ISL_25006	A/chicken/Shanghai/2/2002	H9N2	GISAID
EPI_ISL_2163	A/chicken/Shanghai/3/00	H9N2	GISAID
EPI_ISL_3092	A/chicken/Shanghai/3/01	H9N2	GISAID
EPI_ISL_24998	A/chicken/Shanghai/3/2000	H9N2	GISAID
EPI_ISL_3093	A/chicken/Shanghai/4/01	H9N2	GISAID
EPI_ISL_2164	A/chicken/Shanghai/4-1/01	H9N2	GISAID
[truncated: 637 more rows]

## Sheet: Acknowledge Table
We acknowledge the authors, originating and submitting laboratories of the sequences from GISAID’s EpiFlu™ Database on which this research is based. The list is detailed below.
[truncated: 2,133 more rows]
