# Supplementary material for: LABEL: Fast and Accurate Lineage Assignment with Assessment of H5N1 and H9N2 Influenza A Hemagglutinins
Source: PLOS journal article supplement (doi:10.1371/journal.pone.0086921), 2014-01-23
Supplement: S5 (10.1371/journal.pone.0086921.s005) [file journal.pone.0086921.s005]

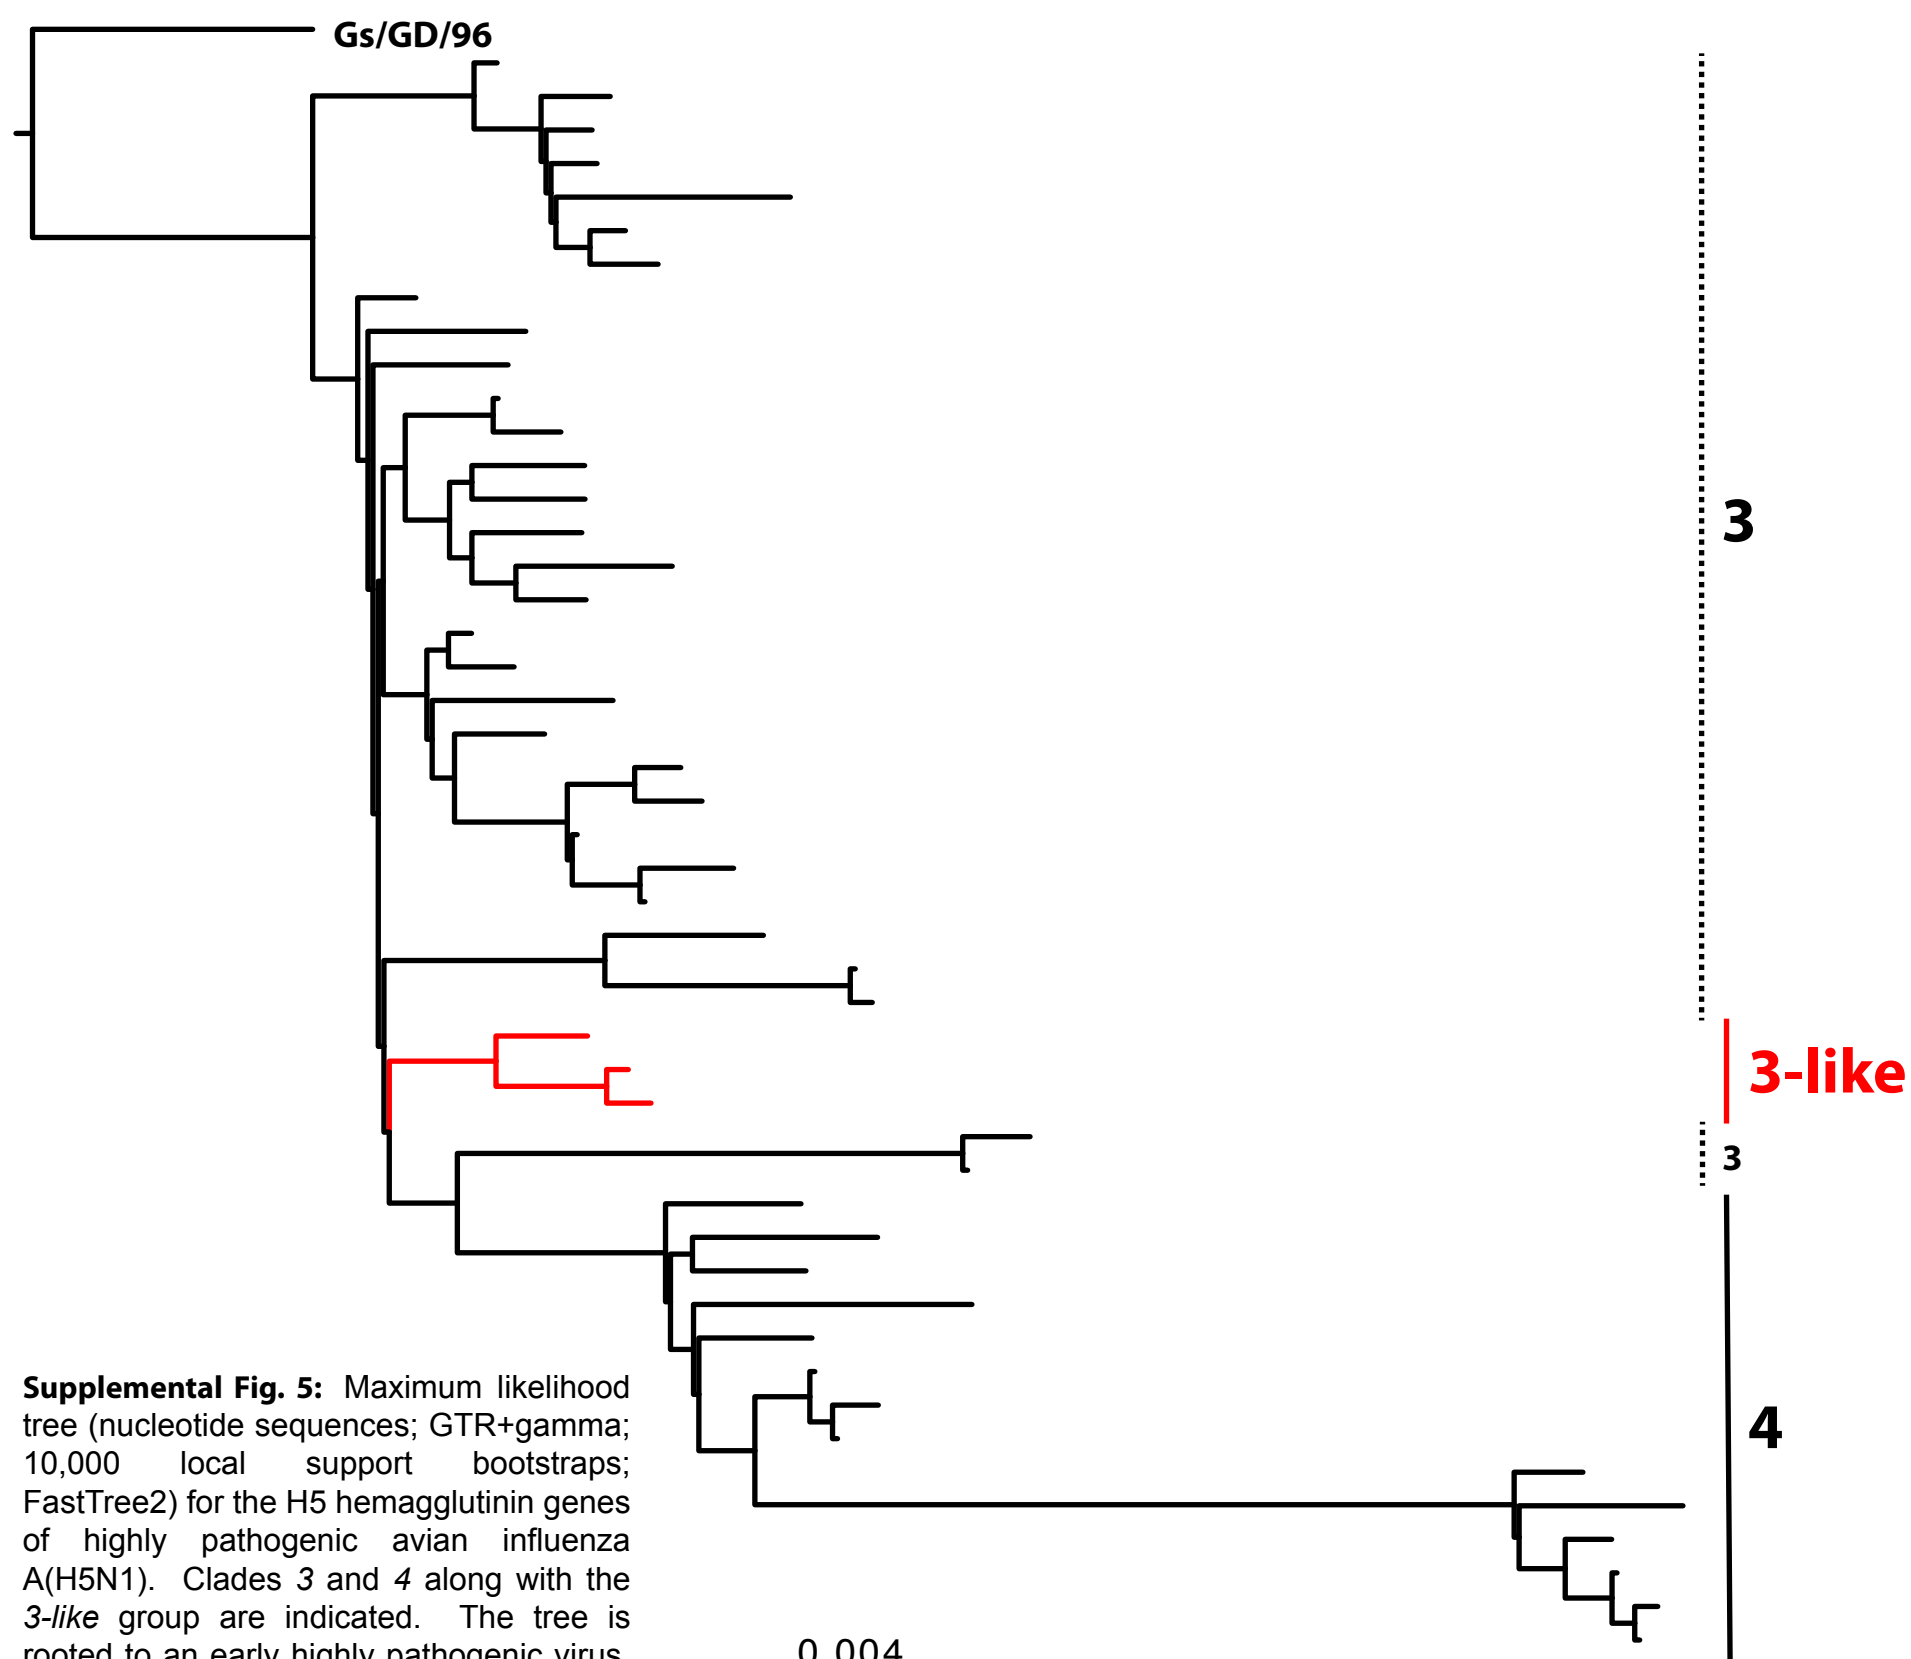

**Supplemental Fig. 5:** Maximum likelihood tree (nucleotide sequences; GTR+gamma; 10,000 local support bootstraps; FastTree2) for the H5 hemagglutinin genes of highly pathogenic avian influenza A(H5N1). Clades 3 and 4 along with the 3-like group are indicated. The tree is rooted to an early highly pathogenic virus, A/goose/Guangdong/96, from clade 0.
